# Supplementary material for: Gill Transcriptomic Responses to Toxin-producing Alga Prymnesium parvum in Rainbow Trout
Source: Front Immunol. 2021 Dec 8;12:794593. doi: 10.3389/fimmu.2021.794593 (PMC8693183; doi:10.3389/fimmu.2021.794593)
Supplement: Supplementary file 6 [file Table_1.xlsx]

## Sheet: Suppl Table 1
	Supplementary Table 1. List of differentially expressed RNA targets in the gills of rainbow trout from HH vs control groups (HH, high exposure/high response), with the cut-off criteria
	at adjusted p-value < 0.05 and absolute Log2 FC > 1. The RNA targets (representing fish genes) were mapped to human orthologs (BLASTX, E-value < 0.00001, top hit) to generate
	HGNC gene identifiers (HGNC, HUGO Gene Nomenclature Committee). Only RNA targets with the unique HGNC gene identifiers (1119 human genes) and the multiple RNA targets
	mapped to the same HGNC identifier with the same direction of change (317 human genes for which the multiple Log2 FC values were averaged) were subjected to functional analysis,
	yielding in total 1436 human orthologs. When submitted to Ingenuity Pathway Analysis (IPA), 1423 of the 1436 human orthologs were recognised as analysis-ready (for information
	retrieved from IPA see columns I and K–M). The remaining 13 genes (not analysis-ready) are denoted by a hyphen (-).
	Probe ID/RNA target	Fish gene ID	Fish gene description	Log2 FC	adj p-value	HGNC symbol		HGNC symbol by IPA	mean Log2 FC	HGNC gene name	Gene location	Gene type
	RNA targets mapped to the unique HGNC gene identifiers (1 RNA target → 1 unique HGNC gene identifier)
	TC167186	AM419432	Chionodraco rastrospinosus mRNA for ceruloplasmin (cp gene)	8.639	2e-05	CP		CP	8.639	ceruloplasmin	Extracellular Space	enzyme
	TC153091	XM_002666701	PREDICTED: Danio rerio carnitine O-palmitoyltransferase 1 liver isoform-like (LOC100333227) mRNA	7.081	0.002945	CPT1A		CPT1A	7.081	carnitine palmitoyltransferase 1A	Cytoplasm	enzyme
	TC152709	AM982800	Oncorhynchus mykiss csf-3 gene for granulocyte colony-stimulating factor exons 1-5	6.004	2e-06	CSF3		CSF3	6.004	colony stimulating factor 3	Extracellular Space	cytokine
	TC160539	CR711242	Tetraodon nigroviridis full-length cDNA	5.466	0.000188	GTPBP2		GTPBP2	5.466	GTP binding protein 2	Extracellular Space	enzyme
	TC144815	not-annotated	not-annotated	5.14	0.046202	SYT12		SYT12	5.14	synaptotagmin 12	Plasma Membrane	transporter
	TC157741	not-annotated	not-annotated	4.338	0	ADAMTS1		ADAMTS1	4.338	ADAM metallopeptidase with thrombospondin type 1 motif 1	Extracellular Space	peptidase
	TC146965	BX255917	Zebrafish DNA sequence from clone DKEY-1H6 in linkage group 20 Contains the gene for a novel protein (zgc:153349) the gene for a novel zinc finger protein the gene for a novel protein (zgc:153157) the gene for a transposase the gene for a novel protein similar to vertebrate methylenetetrahydrofolate dehydrogenase (NADP+ dependent) methenyltetrahydrofolate cyclohydrolase formyltetrahydrofolate syn…	3.784	0	ZBTB1		ZBTB1	3.784	zinc finger and BTB domain containing 1	Nucleus	transcription regulator
	TC154844	BT046226	Salmo salar clone ssal-evd-572-300 Cytochrome c oxidase polypeptide VIII-heart mitochondrial precursor putative mRNA complete cds	3.775	0.042132	COX8A		COX8A	3.775	cytochrome c oxidase subunit 8A	Cytoplasm	enzyme
	TC162975	BT072576	Salmo salar clone ssal-rgf-531-075 Ubiquitin carboxyl-terminal hydrolase isozyme L5 putative mRNA pseudogene cds	3.732	0	UCHL5		UCHL5	3.732	ubiquitin C-terminal hydrolase L5	Cytoplasm	peptidase
	TC140579	BT050084	Salmo salar clone ssal-evf-564-311 MORN repeat-containing protein 3 putative mRNA complete cds	3.635	0.001861	MORN3		MORN3	3.635	MORN repeat containing 3	Nucleus	other
	TC134707	not-annotated	not-annotated	3.62	1e-06	DUSP2		DUSP2	3.62	dual specificity phosphatase 2	Nucleus	phosphatase
	IMM 1095	NM_001173953	Salmo salar Eukaryotic translation initiation factor 2C 3 (i2c3) mRNA_x0001_gb-BT059491.1- Salmo salar clone ssal-rgf-513-072 Eukaryotic translation initiation factor 2C 3 putative mRNA complete cds	3.607	0.001881	AGO3		AGO3	3.607	argonaute RISC catalytic component 3	Cytoplasm	translation regulator
	TC134790	not-annotated	not-annotated	3.362	0	LPAR6		LPAR6	3.362	lysophosphatidic acid receptor 6	Plasma Membrane	G-protein coupled receptor
	TC132480	NM_001124386	Oncorhynchus mykiss alpha-1-microglobulin/bikunin precursor (ambp) mRNA_x0001_emb-AJ544263.1- Oncorhynchus mykiss mRNA for alpha-1-microglobulin/bikunin precursor (ambp gene)	3.347	0.037229	AMBP		AMBP	3.347	alpha-1-microglobulin/bikunin precursor	Extracellular Space	transporter
	TC139519	not-annotated	not-annotated	3.234	0.00563	ARHGAP24		ARHGAP24	3.234	Rho GTPase activating protein 24	Cytoplasm	other
	TC159386	CU463315	Zebrafish DNA sequence from clone CH73-243G21 in linkage group 5 complete sequence	3.216	0	SMTN		SMTN	3.216	smoothelin	Extracellular Space	other
	TC168111	GU108576	Oncorhynchus mykiss BDNF (BDNF) mRNA partial cds	3.187	1e-06	BDNF		BDNF	3.187	brain derived neurotrophic factor	Extracellular Space	growth factor
	TC163645	BT059832	Salmo salar clone ssal-rgg-504-047 Spindle and kinetochore-associated protein 2 putative mRNA complete cds	3.18	0	SKA2		SKA2	3.18	spindle and kinetochore associated complex subunit 2	Nucleus	other
	TC163374	NM_001173933	Salmo salar Glutamate decarboxylase-like protein 1 (gadl1) mRNA_x0001_gb-BT059173.1- Salmo salar clone ssal-rgf-530-029 Glutamate decarboxylase-like protein 1 putative mRNA complete cds	3.153	0	GADL1		GADL1	3.153	glutamate decarboxylase like 1	Cytoplasm	enzyme
	CUST_28_PI420312184	FJ455497	Oreochromis niloticus thrombospondin-1b mRNA complete cds	3.145	0	THBS2		THBS2	3.145	thrombospondin 2	Extracellular Space	other
	TC171135	XM_001922673	PREDICTED: Danio rerio ring finger protein 111 (rnf111) mRNA	3.142	0.000674	RNF111		RNF111	3.142	ring finger protein 111	Nucleus	enzyme
	TC166993	BT072376	Salmo salar clone ssal-rgf-523-021 DNA topoisomerase 2-alpha putative mRNA partial cds	3.124	0.031302	TOP2A		TOP2A	3.124	DNA topoisomerase II alpha	Nucleus	enzyme
	TC143505	BT074136	Oncorhynchus mykiss clone omyk-evo-502-066 CXorf33 precursor putative mRNA complete cds	3.092	0	APOO		APOO	3.092	apolipoprotein O	Extracellular Space	other
	TC138778	BT072616	Salmo salar clone ssal-rgf-532-215 Transposable element Tcb2 transposase putative mRNA pseudogene cds	3.074	1e-06	CD1C		CD1C	3.074	CD1c molecule	Plasma Membrane	other
	TC165197	BT050166	Salmo salar clone ssal-evf-534-154 Mitochondrial ribosomal protein 63 putative mRNA complete cds	3.04	4.6e-05	MRP63		MRPL57	3.04	mitochondrial ribosomal protein L57	Cytoplasm	other
	TC141710	NM_001140097	Salmo salar transglutaminase 1 (K polypeptide epidermal type I protein-glutamine-gamma-glutamyltransferase) (tgm1) mRNA_x0001_gb-BT045232.1- Salmo salar clone ssal-rgf-515-349 Protein-glutamine gamma-glutamyltransferase K putative mRNA complete cds	3.005	0	TGM1		TGM1	3.005	transglutaminase 1	Plasma Membrane	enzyme
	TC149008	BT049284	Salmo salar clone ssal-evd-526-271 Gastrotropin putative mRNA complete cds	2.916	0	FABP6		FABP6	2.916	fatty acid binding protein 6	Cytoplasm	transporter
	CUST_29_PI420312184	BT059485	Salmo salar clone ssal-rgf-516-265 Cyclic AMP-dependent transcription factor ATF-3 putative mRNA complete cds	2.913	0	ATF3		ATF3	2.913	activating transcription factor 3	Nucleus	transcription regulator
	TC144172	BT028065	Gasterosteus aculeatus clone CNB118-A06 mRNA sequence	2.807	0	SLC26A5		SLC26A5	2.807	solute carrier family 26 member 5	Plasma Membrane	transporter
	TC164183	X01064	Rainbow trout histone H2A and H3 genes	2.806	0.020598	HIST1H2AH		H2AC12	2.806	H2A clustered histone 12	Nucleus	other
	TC162902	NM_001161448	Oncorhynchus mykiss apolipoprotein A-II (apoa2) mRNA_x0001_dbj-AB212663.1- Oncorhynchus mykiss apoa2 mRNA for apolipoprotein A-II complete cds	2.804	0.011248	APOA2		APOA2	2.804	apolipoprotein A2	Extracellular Space	transporter
	TC169570	CR724636	Tetraodon nigroviridis full-length cDNA	2.796	0	PLEK2		PLEK2	2.796	pleckstrin 2	Plasma Membrane	other
	IMM 786	AF093808	Oncorhynchus mykiss clone J3 chemokine CK-1 gene complete cds	2.775	0.023621	CK1		-	2.775	-	-	-
	TC147099	FJ455497	Oreochromis niloticus thrombospondin-1b mRNA complete cds	2.75	2e-06	THBS1		THBS1	2.75	thrombospondin 1	Extracellular Space	other
	TC154495	NM_001104831	Oryzias latipes tissue-type plasminogen activator (tpa) mRNA_x0001_dbj-AB178522.1- Oryzias latipes tPA mRNA for tissue-type plasminogen activator complete cds	2.749	0	TMPRSS11B		TMPRSS11B	2.749	transmembrane serine protease 11B	Cytoplasm	peptidase
	TC163091	BC165610	Danio rerio ERO1-like (S. cerevisiae) mRNA (cDNA clone MGC:192698 IMAGE:100061157) complete cds	2.735	9e-06	ERO1L		ERO1A	2.735	endoplasmic reticulum oxidoreductase 1 alpha	Cytoplasm	enzyme
	TC158965	NM_001140052	Salmo salar DnaJ homolog subfamily B member 1 (dnjb1) mRNA_x0001_gb-BT045145.1- Salmo salar clone ssal-rgf-513-142 DnaJ homolog subfamily B member 1 putative mRNA complete cds	2.718	1e-06	DNAJB5		DNAJB5	2.718	DnaJ heat shock protein family (Hsp40) member B5	Cytoplasm	other
	TC155801	EU025719	Salmo salar lunapark (Lnp) and even-skipped homeobox 2 (Evx2) genes complete cds; HoxD13ab pseudogene complete sequence; homeobox protein HoxD12ab (HoxD12ab) homeobox protein HoxD11ab (HoxD11ab) homeobox protein HoxD10ab (HoxD10ab) homeobox protein HoxD9ab (HoxD9ab) homeobox protein HoxD4ab (HoxD4ab) and homeobox protein HoxD3ab (HoxD3ab) genes complete cds; and HoxD1ab pseudogene complete sequen…	2.702	1e-06	HOXD3		HOXD3	2.702	homeobox D3	Nucleus	transcription regulator
	TC134526	BT027393	Gasterosteus aculeatus clone CFW265-A06 mRNA sequence	2.701	0	RASSF8		RASSF8	2.701	Ras association domain family member 8	Extracellular Space	other
	TC149924	not-annotated	not-annotated	2.7	0	PPP1R15B		PPP1R15B	2.7	protein phosphatase 1 regulatory subunit 15B	Cytoplasm	phosphatase
	TC163315	AF063216	Oncorhynchus keta insulin-like growth factor I precursor (IGF-I.1) gene complete cds	2.686	0.000733	PLEKHG5		PLEKHG5	2.686	pleckstrin homology and RhoGEF domain containing G5	Cytoplasm	other
	TC164662	BT072698	Salmo salar clone ssal-rgf-537-067 6-phosphofructo-2-kinase/fructose-26-biphosphatase 3 putative mRNA partial cds	2.678	1e-06	PFKFB3		PFKFB3	2.678	6-phosphofructo-2-kinase/fructose-2,6-biphosphatase 3	Cytoplasm	kinase
	TC141908	not-annotated	not-annotated	2.645	0.040585	GRP		GRP	2.645	gastrin releasing peptide	Extracellular Space	growth factor
	TC153761	FQ310506	Dicentrarchus labrax chromosome sequence corresponding to linkage group 1 top part complete sequence	2.642	0.038752	AGGF1		AGGF1	2.642	angiogenic factor with G-patch and FHA domains 1	Cytoplasm	other
	TC151711	not-annotated	not-annotated	2.629	0	SLC5A3		SLC5A3	2.629	solute carrier family 5 member 3	Plasma Membrane	transporter
	TC155559	NM_001139623	Salmo salar LOC394070 protein-like (LOC100194537) mRNA_x0001_gb-BT043570.1- Salmo salar clone HM4_2395 LOC394070 protein-like mRNA complete cds	2.626	0.002092	TRIM54		TRIM54	2.626	tripartite motif containing 54	Cytoplasm	other
	TC168434	BT050297	Salmo salar clone ssal-eve-547-204 slowmo homolog 2 putative mRNA complete cds	2.62	3e-06	SLMO2		PRELID3B	2.62	PRELI domain containing 3B	Cytoplasm	other
	TC151127	BT075192	Osmerus mordax clone omor-eva-507-053 ADP-ribosylation factor-like protein 5B putative mRNA complete cds	2.612	1e-06	ARL5B		ARL5B	2.612	ADP ribosylation factor like GTPase 5B	Other	enzyme
	TC142091	BT049175	Salmo salar clone ssal-eve-525-347 Dual specificity protein phosphatase 5 putative mRNA complete cds	2.612	0	DUSP5		DUSP5	2.612	dual specificity phosphatase 5	Nucleus	phosphatase
	TC164551	not-annotated	not-annotated	2.605	0.039396	SRRM1		SRRM1	2.605	serine and arginine repetitive matrix 1	Nucleus	other
	TC165246	BT073110	Oncorhynchus mykiss clone omyk-evn-511-317 60S ribosomal protein L36 putative mRNA complete cds	2.59	0	RPL36		RPL36	2.59	ribosomal protein L36	Cytoplasm	other
	TC171904	NM_001114437	Danio rerio zgc:175108 (zgc:175108) mRNA_x0001_gb-BC155323.1- Danio rerio zgc:175108 mRNA (cDNA clone MGC:175108 IMAGE:6959935) complete cds	2.584	0.023543	FAM5C		BRINP3	2.584	BMP/retinoic acid inducible neural specific 3	Cytoplasm	other
	TC161674	CR637562	Tetraodon nigroviridis full-length cDNA	2.583	3.3e-05	MAFK		MAFK	2.583	MAF bZIP transcription factor K	Nucleus	transcription regulator
	TC149583	not-annotated	not-annotated	2.58	3e-06	PPAP2A		PLPP1	2.58	phospholipid phosphatase 1	Plasma Membrane	phosphatase
	TC152536	not-annotated	not-annotated	2.578	0.049047	SLC16A8		SLC16A8	2.578	solute carrier family 16 member 8	Plasma Membrane	transporter
	TC158604	not-annotated	not-annotated	2.567	5e-06	SSH1		SSH1	2.567	slingshot protein phosphatase 1	Cytoplasm	phosphatase
	TC136782	BT059729	Salmo salar clone ssal-rgf-537-311 Transcription factor jun-D putative mRNA complete cds	2.566	1e-06	JUND		JUND	2.566	JunD proto-oncogene, AP-1 transcription factor subunit	Nucleus	transcription regulator
	TC140127	NM_001140121	Salmo salar IMM ediate early response 2 (ier2) mRNA_x0001_gb-BT045276.1- Salmo salar clone ssal-rgf-517-071 IMM ediate early response gene 2 protein putative mRNA complete cds	2.562	4e-06	IER2		IER2	2.562	immediate early response 2	Cytoplasm	transcription regulator
	TC163106	BT027597	Gasterosteus aculeatus clone CGX58-C04 mRNA sequence	2.56	0.001368	MMP19		MMP19	2.56	matrix metallopeptidase 19	Extracellular Space	peptidase
	TC155035	NM_001173658	Salmo salar 14-3-3 protein gamma-1 (143g1) mRNA_x0001_gb-BT059187.1- Salmo salar clone ssal-rgf-531-165 14-3-3 protein gamma-1 putative mRNA complete cds	2.552	0.047624	YWHAG		YWHAG	2.552	tyrosine 3-monooxygenase/tryptophan 5-monooxygenase activation protein gamma	Cytoplasm	other
	TC133956	HQ287746	Coregonus clupeaformis heat shock cognate 70 kDa protein (HSP70) gene partial cds	2.547	0.022462	AQP4		AQP4	2.547	aquaporin 4	Plasma Membrane	transporter
	TC136239	BT047374	Salmo salar clone ssal-evd-503-122 Ankyrin repeat domain-containing protein 9 putative mRNA complete cds	2.52	6.5e-05	ANKRD9		ANKRD9	2.52	ankyrin repeat domain 9	Cytoplasm	other
	IMM 765	NM_001124748	Oncorhynchus mykiss heat shock transcription factor 1b (hsf1b) mRNA_x0001_dbj-AB062549.1- Oncorhynchus mykiss HSF1 mRNA for heat shock transcription factor 1 isoform b complete cds	2.511	0.027043	HSF1		HSF1	2.511	heat shock transcription factor 1	Nucleus	transcription regulator
	TC138811	NM_001124516	Oncorhynchus mykiss regulator of G-protein signalling 14 (LOC100136252) mRNA_x0001_gb-AY606041.1- Oncorhynchus mykiss regulator of G-protein signalling 14 mRNA complete cds	2.51	3.3e-05	RGS12		RGS12	2.51	regulator of G protein signaling 12	Nucleus	enzyme
	TC159787	NM_001141465	Salmo salar FAM86A (fa86a) mRNA_x0001_gb-BT049756.1- Salmo salar clone ssal-rgb2-523-033 FAM86A putative mRNA complete cds	2.506	0.003007	FAM86A		EEF2KMT	2.506	eukaryotic elongation factor 2 lysine methyltransferase	Cytoplasm	enzyme
	TC152892	NM_001098787	Homo sapiens blocked early in transport 1 homolog (S. cerevisiae)-like (BET1L) transcript variant 1 mRNA	2.494	0.010292	BET1L		BET1L	2.494	Bet1 golgi vesicular membrane trafficking protein like	Cytoplasm	transporter
	TC156824	BT059092	Salmo salar clone ssal-rgf-524-260 WD repeat and SOF domain-containing protein 1 putative mRNA complete cds	2.494	0.017789	DCAF13		DCAF13	2.494	DDB1 and CUL4 associated factor 13	Nucleus	other
	TC158951	BT072461	Salmo salar clone ssal-rgf-526-152 unknown large open reading frame mRNA novel cds	2.466	4.5e-05	C10orf118		CCDC186	2.466	coiled-coil domain containing 186	Cytoplasm	other
	TC169661	not-annotated	not-annotated	2.459	1e-06	CASP3		CASP3	2.459	caspase 3	Cytoplasm	peptidase
	TC137721	NM_001140813	Salmo salar E3 ubiquitin-protein ligase LINCR (lincr) mRNA_x0001_gb-BT047112.1- Salmo salar clone ssal-eve-522-230 E3 ubiquitin-protein ligase LINCR putative mRNA complete cds	2.436	7e-06	NEURL1B		NEURL1B	2.436	neuralized E3 ubiquitin protein ligase 1B	Other	enzyme
	TC138769	BT072355	Salmo salar clone ssal-rgf-522-209 Gamma-soluble NSF attachment protein putative mRNA pseudogene cds	2.43	0.03181	NAPG		NAPG	2.43	NSF attachment protein gamma	Cytoplasm	transporter
	IMM 750	AF281339	Oncorhynchus mykiss hemopexin-like protein variant 1 mRNA partial cds	2.426	0.021803	HPX		HPX	2.426	hemopexin	Extracellular Space	transporter
	TC138035	NM_001173596	Salmo salar Cysteine-rich secretory protein LCCL domain-containing 2 (crld2) mRNA_x0001_gb-BT059013.1- Salmo salar clone ssal-rgf-520-134 Cysteine-rich secretory protein LCCL domain-containing 2 precursor putative mRNA complete cds	2.425	3e-06	CRISPLD2		CRISPLD2	2.425	cysteine rich secretory protein LCCL domain containing 2	Cytoplasm	other
	CUST_1_PI425348775	NP_001182113	Oncorhynchus mykiss GMCSF	2.418	0.001156	GMCSF		-	2.418	-	-	-
	TC139384	not-annotated	not-annotated	2.402	3e-06	UGDH		UGDH	2.402	UDP-glucose 6-dehydrogenase	Nucleus	enzyme
	TC136272	BT045043	Salmo salar clone ssal-rgf-510-202 Signal recognition particle receptor subunit beta putative mRNA complete cds	2.4	0.010216	SRPRB		SRPRB	2.4	SRP receptor subunit beta	Cytoplasm	other
	TC144295	NM_001146575	Salmo salar Astrocytic phosphoprotein PEA-15 (pea15) mRNA_x0001_gb-BT057531.1- Salmo salar clone ssal-sjb-015-214 Astrocytic phosphoprotein PEA-15 putative mRNA complete cds	2.399	0.013229	PEA15		PEA15	2.399	proliferation and apoptosis adaptor protein 15	Cytoplasm	transporter
	TC160560	NM_001146673	Salmo salar Intracellular hyaluronan-binding protein 4 (habp4) mRNA_x0001_gb-BT057765.1- Salmo salar clone ssal-rgb2-509-276 Intracellular hyaluronan-binding protein 4 putative mRNA complete cds	2.396	0.029185	SERBP1		SERBP1	2.396	SERPINE1 mRNA binding protein 1	Cytoplasm	other
	TC133055	BT075244	Osmerus mordax clone omor-rgc-510-377 Alpha-N-acetylgalactosaminide alpha-26-sialyltransferase 2 putative mRNA complete cds	2.393	0.019222	ST6GALNAC2		ST6GALNAC2	2.393	ST6 N-acetylgalactosaminide alpha-2,6-sialyltransferase 2	Cytoplasm	enzyme
	TC137311	BT072037	Salmo salar clone ssal-rgf-508-227 High affinity cAMP-specific 35-cyclic phosphodiesterase 7A putative mRNA pseudogene cds	2.376	1.4e-05	PDE7A		PDE7A	2.376	phosphodiesterase 7A	Cytoplasm	enzyme
	TC160535	BX510646	Zebrafish DNA sequence from clone CH211-221B16 in linkage group 9 Contains the gene for a novel protein with Zinc finger C3HC4 type (RING finger) and B-box zinc finger domains the 5' end of the mycbp2 gene for MYC binding protein 2 the gene for a novel protein similar to vertebrate kelch repeat and BTB (POZ) domain the scel gene for sciellin the gene for a novel protein similar to vertebrate RAB3…	2.371	0.037214	THOC1		THOC1	2.371	THO complex 1	Nucleus	transcription regulator
	TC172345	BT045651	Salmo salar clone ssal-rgf-527-327 Golgi-associated plant pathogenesis-related protein 1 putative mRNA complete cds	2.37	3e-06	GLIPR2		GLIPR2	2.37	GLI pathogenesis related 2	Cytoplasm	other
	TC143191	NM_001141836	Salmo salar proenkephalin (penk) mRNA_x0001_gb-BT046858.1- Salmo salar clone ssal-evf-501-168 Proenkephalin A precursor putative mRNA complete cds	2.369	0.029678	PENK		PENK	2.369	proenkephalin	Extracellular Space	other
	IMM 748	AF281352	Oncorhynchus mykiss putative fibrinogen gamma A chain. mRNA partial cds	2.368	0.000506	FGG		FGG	2.368	fibrinogen gamma chain	Extracellular Space	other
	TC136463	not-annotated	not-annotated	2.366	7e-06	ADAM19		ADAM19	2.366	ADAM metallopeptidase domain 19	Plasma Membrane	peptidase
	TC162094	NM_001141273	Salmo salar LIM domain and actin binding 1 (lima1) mRNA_x0001_gb-BT048876.2- Salmo salar clone ssal-eve-506-175 LIM domain and actin-binding protein 1 putative mRNA complete cds	2.363	1e-06	LIMA1		LIMA1	2.363	LIM domain and actin binding 1	Cytoplasm	other
	TC147623	NM_001160475	Oncorhynchus mykiss pepsinogen (LOC100301637) mRNA_x0001_gb-EU880230.1- Oncorhynchus mykiss pepsinogen mRNA complete cds	2.332	0.036002	PGA5		PGA5 (includes others)	2.332	pepsinogen A4	Extracellular Space	peptidase
	TC168898	NM_001173609	Salmo salar Serine/threonine-protein phosphatase 2A catalytic subunit alpha isoform (pp2aa) mRNA_x0001_gb-BT059043.1- Salmo salar clone ssal-rgf-522-013 Serine/threonine-protein phosphatase 2A catalytic subunit alpha isoform putative mRNA complete cds	2.324	0.045184	PPP2CA		PPP2CA	2.324	protein phosphatase 2 catalytic subunit alpha	Cytoplasm	phosphatase
	TC168316	XM_696143	PREDICTED: Danio rerio e3 ubiquitin-protein ligase HACE1-like (LOC572430) mRNA	2.322	0.00015	HACE1		HACE1	2.322	HECT domain and ankyrin repeat containing E3 ubiquitin protein ligase 1	Cytoplasm	enzyme
	TC163822	NM_001173559	Salmo salar ADP-ribosylation factor 1 like (arf1l) mRNA_x0001_gb-BT045630.1- Salmo salar clone ssal-rgf-527-050 ADP-ribosylation factor 1 putative mRNA complete cds	2.318	0.037588	ARF1		ARF1	2.318	ADP ribosylation factor 1	Cytoplasm	enzyme
	TC143115	AB258536	Oncorhynchus mykiss Onmy-LDA gene for MHC class I antigen allele: Onmy-LDA*0101 and other genes complete cds	2.318	0.043461	ASB14		ASB14	2.318	ankyrin repeat and SOCS box containing 14	Cytoplasm	other
	TC143863	NM_001165305	Salmo salar Sodium-coupled neutral amino acid transporter 2 (s38a2) mRNA_x0001_gb-BT058721.1- Salmo salar clone ssal-rgf-001-053 Sodium-coupled neutral amino acid transporter 2 putative mRNA complete cds	2.318	0	SLC38A2		SLC38A2	2.318	solute carrier family 38 member 2	Plasma Membrane	transporter
	TC138299	not-annotated	not-annotated	2.307	0.026811	ZNF770		ZNF770	2.307	zinc finger protein 770	Other	other
	TC138593	BC165239	Danio rerio nudE nuclear distribution gene E homolog like 1 (A. nidulans) B mRNA (cDNA clone MGC:193101 IMAGE:100060724) complete cds	2.304	0.000971	NDEL1		NDEL1	2.304	nudE neurodevelopment protein 1 like 1	Nucleus	peptidase
	TC146724	NM_001101670	Danio rerio T-box 3 (tbx3) mRNA	2.304	0.034145	TBX3		TBX3	2.304	T-box transcription factor 3	Nucleus	transcription regulator
	TC155870	not-annotated	not-annotated	2.302	1e-06	FRRS1		FRRS1	2.302	ferric chelate reductase 1	Plasma Membrane	cell surface receptor
	TC136643	NM_001124401	Oncorhynchus mykiss alpha23-sialyltransferase (st3gal-i) mRNA_x0001_emb-AJ585760.1- Oncorhynchus mykiss mRNA for alpha23-sialyltransferase (st3Gal-I gene)	2.299	0.005476	ST3GAL1		ST3GAL1	2.299	ST3 beta-galactoside alpha-2,3-sialyltransferase 1	Cytoplasm	enzyme
	TC134871	NM_001164765	Salmo salar leptin receptor (lepr) mRNA_x0001_dbj-AB489201.1- Salmo salar LEPR mRNA for leptin receptor complete cds	2.294	3e-06	LEPR		LEPR	2.294	leptin receptor	Plasma Membrane	cell surface receptor
	TC150845	NM_001146638	Salmo salar Gap junction beta-5 protein (cxb5) mRNA_x0001_gb-BT057893.1- Salmo salar clone ssal-evf-512-286 Gap junction beta-5 protein putative mRNA complete cds	2.279	0.003281	SRRM2		SRRM2	2.279	serine/arginine repetitive matrix 2	Nucleus	other
	TC156307	HM159472	Salmo salar clone BAC 261D01 Foxl2-like protein (Foxl2) gene complete cds	2.276	1.8e-05	KDELC2		POGLUT3	2.276	protein O-glucosyltransferase 3	Other	other
	TC150131	not-annotated	not-annotated	2.269	0.004084	EMR3		ADGRE3	2.269	adhesion G protein-coupled receptor E3	Plasma Membrane	G-protein coupled receptor
	TC149612	BT046014	Salmo salar clone ssal-rgf-539-123 Myelin proteolipid protein putative mRNA complete cds	2.269	0.004701	GPM6B		GPM6B	2.269	glycoprotein M6B	Plasma Membrane	other
	TC146229	BT045758	Salmo salar clone ssal-rgf-530-251 CD99 antigen precursor putative mRNA complete cds	2.259	0.010028	CD99		CD99	2.259	CD99 molecule (Xg blood group)	Plasma Membrane	other
	TC161494	NM_001173646	Salmo salar Pyridoxal phosphate phosphatase (plpp) mRNA_x0001_gb-BT059157.1- Salmo salar clone ssal-rgf-528-321 Pyridoxal phosphate phosphatase putative mRNA complete cds	2.256	1e-06	PDXP		PDXP	2.256	pyridoxal phosphatase	Plasma Membrane	phosphatase
	TC153421	XM_002665785	PREDICTED: Danio rerio fermitin family member 1 (fermt1) mRNA	2.222	3e-06	FERMT1		FERMT1	2.222	fermitin family member 1	Plasma Membrane	other
	TC153286	BT045314	Salmo salar clone ssal-rgf-518-097 Neuroendocrine convertase 2 precursor putative mRNA complete cds	2.221	0.006997	PCSK2		PCSK2	2.221	proprotein convertase subtilisin/kexin type 2	Extracellular Space	peptidase
	TC159929	GU817336	Salmo salar clone BAC CHORI214-109F19 complete sequence	2.212	3e-06	ZNF708		ZNF708	2.212	zinc finger protein 708	Nucleus	other
	TC162751	HQ287746	Coregonus clupeaformis heat shock cognate 70 kDa protein (HSP70) gene partial cds	2.203	0.002303	LCMT1		LCMT1	2.203	leucine carboxyl methyltransferase 1	Cytoplasm	enzyme
	TC144170	XM_002664615	PREDICTED: Danio rerio unc-51-like kinase 2 (C. elegans) (ulk2) mRNA	2.197	0.001385	ULK2		ULK2	2.197	unc-51 like autophagy activating kinase 2	Cytoplasm	kinase
	TC138777	NM_001141209	Salmo salar Cell death activator CIDE-3 (cidec) mRNA_x0001_gb-BT048671.1- Salmo salar clone ssal-evd-565-241 Cell death activator CIDE-3 putative mRNA complete cds	2.193	0	CIDEC		CIDEC	2.193	cell death inducing DFFA like effector c	Cytoplasm	other
	TC162797	XR_026691	PREDICTED: Gallus gallus hypothetical protein LOC769661 (LOC769661) partial mRNA	2.177	0.006228	ATF7		ATF7	2.177	activating transcription factor 7	Nucleus	transcription regulator
	TC158841	not-annotated	not-annotated	2.166	1e-06	PIK3R5		PIK3R5	2.166	phosphoinositide-3-kinase regulatory subunit 5	Cytoplasm	kinase
	TC162013	NM_200181	Danio rerio SH3-domain GRB2-like 3 (sh3gl3) mRNA_x0001_gb-AY398419.1- Danio rerio clone RK101A1F07 SH3-domain GRB2-like 3 (SH3GL3) mRNA complete cds	2.163	0.004828	SH3GL3		SH3GL3	2.163	SH3 domain containing GRB2 like 3, endophilin A3	Cytoplasm	other
	TC172307	EU221179	Salmo salar clone 261P24 interferon-inducible GTPase_b and interferon-inducible GTPase_a genes complete cds; and TCR-gamma constant region locus	2.152	1e-06	IRGC		IRGC	2.152	immunity related GTPase cinema	Other	other
	TC152405	not-annotated	not-annotated	2.144	2.3e-05	HRNR		HRNR	2.144	hornerin	Cytoplasm	other
	TC146511	BT072461	Salmo salar clone ssal-rgf-526-152 unknown large open reading frame mRNA novel cds	2.128	0.000354	CEP250		CEP250	2.128	centrosomal protein 250	Nucleus	other
	TC160118	HM210102	Danio rerio polo-like kinase 3 mRNA complete cds	2.12	0.000152	PLK3		PLK3	2.12	polo like kinase 3	Nucleus	kinase
	TC158716	not-annotated	not-annotated	2.111	0.012487	ANGPT2		ANGPT2	2.111	angiopoietin 2	Extracellular Space	growth factor
	TC144422	NM_001172549	Oncorhynchus mykiss carbonic anhydrase II (ca2) mRNA_x0001_gb-AY514870.1- Oncorhynchus mykiss cytoplasmic carbonic anhydrase (CA2) mRNA complete cds	2.103	3.4e-05	CA2		CA2	2.103	carbonic anhydrase 2	Cytoplasm	enzyme
	IMM 831	AF281354	Oncorhynchus mykiss putative hepcidin antibacterial peptide mRNA partial cds	2.101	0.007023	HAMP		HAMP	2.101	hepcidin antimicrobial peptide	Extracellular Space	other
	TC166175	BT056800	Salmo salar clone ssal-evf-555-267 FAM60A putative mRNA complete cds	2.098	0.003371	FAM60A		SINHCAF	2.098	SIN3-HDAC complex associated factor	Extracellular Space	other
	TC166658	NM_001140281	Salmo salar RAB14 member RAS oncogene family (rab14) mRNA_x0001_gb-BT045578.1- Salmo salar clone ssal-rgf-525-209 Ras-related protein Rab-14 putative mRNA complete cds	2.088	0.049825	RAB14		RAB14	2.088	RAB14, member RAS oncogene family	Cytoplasm	enzyme
	TC132408	NM_001124527	Oncorhynchus mykiss vasoactive intestinal polypeptide receptor type 2 (LOC100136266) mRNA_x0001_gb-AY706217.1- Oncorhynchus mykiss vasoactive intestinal polypeptide receptor type 2 mRNA complete cds	2.087	0.011072	VIPR2		VIPR2	2.087	vasoactive intestinal peptide receptor 2	Plasma Membrane	G-protein coupled receptor
	TC142948	XM_002690526	PREDICTED: Bos taurus coronin actin binding protein 2B-like (LOC615274) mRNA	2.079	0.035447	CORO2A		CORO2A	2.079	coronin 2A	Cytoplasm	other
	TC157886	AJ717301	Oncorhynchus mykiss mRNA for vascular endothelial growth factor precursor (vegf gene) isoform VEGF122	2.074	1.8e-05	VEGFA		VEGFA	2.074	vascular endothelial growth factor A	Extracellular Space	growth factor
	TC141603	NM_001140154	Salmo salar B-cell CLL/lymphoma 7b (bcl7b) mRNA_x0001_gb-BT045337.1- Salmo salar clone ssal-rgf-518-281 B-cell CLL/lymphoma 7 protein family member B putative mRNA complete cds	2.064	2.4e-05	BCL7B		BCL7B	2.064	BAF chromatin remodeling complex subunit BCL7B	Nucleus	other
	IMM 182	BC134807	Danio rerio fibroblast growth factor receptor 2 mRNA (cDNA clone MGC:158199 IMAGE:6524173) complete cds	2.064	0.011545	FGFR2		FGFR2	2.064	fibroblast growth factor receptor 2	Plasma Membrane	kinase
	TC158301	XM_003263167	PREDICTED: Nomascus leucogenys triple functional domain protein-like (LOC100582587) mRNA	2.064	0.018819	TRIO		TRIO	2.064	trio Rho guanine nucleotide exchange factor	Cytoplasm	kinase
	TC159851	XR_084230	PREDICTED: Danio rerio trinucleotide repeat-containing gene 6A protein-like (LOC100333223) miscRNA	2.053	0.047277	TNRC6A		TNRC6A	2.053	trinucleotide repeat containing adaptor 6A	Nucleus	other
	TC171240	XM_001372035	PREDICTED: Monodelphis domestica similar to neuregulin 1 (LOC100019114) mRNA	2.051	0.025461	NRG1		NRG1	2.051	neuregulin 1	Plasma Membrane	growth factor
	TC154116	GU817337	Salmo salar clone BAC CHORI214-107E05 complete sequence	2.05	6e-06	ARL4C		ARL4C	2.05	ADP ribosylation factor like GTPase 4C	Nucleus	enzyme
	TC163962	NM_001140288	Salmo salar Polypyrimidine tract-binding protein 1 (ptbp1) mRNA_x0001_gb-BT045589.1- Salmo salar clone ssal-rgf-525-345 Polypyrimidine tract-binding protein 1 putative mRNA complete cds	2.05	0.036643	PTBP1		PTBP1	2.05	polypyrimidine tract binding protein 1	Nucleus	enzyme
	TC165542	BX255950	Zebrafish DNA sequence from clone CH211-250K6 in linkage group 9 Contains the tbx15 gene for T-box 15 and a gene for a novel protein similar to vertebrate tryptophanyl tRNA synthetase 2 (mitochondrial) (WARS2 zgc:110828) complete sequence	2.039	0.016791	TBX15		TBX15	2.039	T-box transcription factor 15	Nucleus	transcription regulator
	TC153937	NM_001045268	Danio rerio YY1 associated factor 2 (yaf2) mRNA_x0001_gb-BC116594.1- Danio rerio YY1 associated factor 2 mRNA (cDNA clone MGC:136577 IMAGE:7294132) complete cds	2.039	8e-05	YAF2		YAF2	2.039	YY1 associated factor 2	Nucleus	transcription regulator
	TC156144	BT056792	Salmo salar clone ssal-eve-558-331 Eukaryotic translation initiation factor 1b putative mRNA complete cds	2.038	1e-06	EIF1		EIF1	2.038	eukaryotic translation initiation factor 1	Cytoplasm	translation regulator
	TC133303	NM_001141526	Salmo salar Pleckstrin homology-like domain family A member 2 (phla2) mRNA_x0001_gb-BT050012.1- Salmo salar clone ssal-eve-579-162 Pleckstrin homology-like domain family A member 2 putative mRNA complete cds	2.038	1e-06	PHLDA2		PHLDA2	2.038	pleckstrin homology like domain family A member 2	Cytoplasm	other
	TC158766	AJ320156	Oncorhynchus mykiss iip1 gene for interferon inducible protein 1 exons 1-2	2.034	2.8e-05	IFITM3		IFITM3	2.034	interferon induced transmembrane protein 3	Plasma Membrane	other
	TC133949	XM_002400886	Ixodes scapularis sulfite-dehydrogenase putative mRNA	2.034	6.2e-05	SUOX		SUOX	2.034	sulfite oxidase	Cytoplasm	enzyme
	TC147730	NM_001111160	Danio rerio prostaglandin I2 (prostacyclin) synthase (ptgis) mRNA_x0001_gb-EU236593.1- Danio rerio prostaglandin I2 synthase (PGIS) mRNA complete cds	2.031	0	PTGIS		PTGIS	2.031	prostaglandin I2 synthase	Cytoplasm	enzyme
	TC139517	AF281345	Oncorhynchus mykiss trout C-polysaccharide binding protein 1 mRNA partial cds	2.026	0.03428	C1QTNF3		C1QTNF3	2.026	C1q and TNF related 3	Extracellular Space	other
	TC136012	not-annotated	not-annotated	2.018	4.5e-05	TMIGD2		TMIGD2	2.018	transmembrane and immunoglobulin domain containing 2	Other	other
	TC171614	NM_001123011	Danio rerio zgc:158426 (zgc:158426) mRNA_x0001_gb-BC160606.1- Danio rerio zgc:158426 mRNA (cDNA clone MGC:158426 IMAGE:7069672) complete cds	2.012	1e-06	FAM13B		FAM13B	2.012	family with sequence similarity 13 member B	Cytoplasm	other
	TC163221	NM_001139660	Salmo salar ATP synthase H+ transporting mitochondrial F1 complex alpha subunit 1 cardiac muscle (atp5a1) nuclear gene encoding mitochondrial protein mRNA_x0001_gb-BT043637.1- Salmo salar clone HM5_0660 ATP synthase H+ transporting mitochondrial F1 complex alpha subunit 1 (atp5a1) mRNA complete cds; nuclear gene for mitochondrial product	2.009	0.008445	ATP5A1		ATP5F1A	2.009	ATP synthase F1 subunit alpha	Cytoplasm	transporter
	TC167513	not-annotated	not-annotated	2.005	5.5e-05	C1orf170		PERM1	2.005	PPARGC1 and ESRR induced regulator, muscle 1	Other	other
	TC150440	not-annotated	not-annotated	2.005	0.033867	GAS2		GAS2	2.005	growth arrest specific 2	Cytoplasm	other
	IMM 648	BT049610	Salmo salar clone ssal-rgb-527-353 Mannose-binding protein C precursor putative mRNA complete cds	1.999	0.010327	MBL2		MBL2	1.999	mannose binding lectin 2	Extracellular Space	other
	TC168387	BX548078	Zebrafish DNA sequence from clone CH211-212C13 in linkage group 15 complete sequence	1.995	9e-06	PZP		PZP	1.995	PZP alpha-2-macroglobulin like	Extracellular Space	other
	TC141241	XM_002938129	PREDICTED: Xenopus (Silurana) tropicalis serine/threonine-protein kinase 35-like (LOC100497495) partial mRNA	1.991	0.00066	STK35		STK35	1.991	serine/threonine kinase 35	Cytoplasm	kinase
	TC145254	HQ021732	Sparus aurata clone contig01026 genomic sequence	1.985	0.006609	SWAP70		SWAP70	1.985	switching B cell complex subunit SWAP70	Cytoplasm	other
	TC154899	GQ505858	Salmo salar clone BAC CHORI214-129P21 genomic sequence	1.979	0.000251	ESRRG		ESRRG	1.979	estrogen related receptor gamma	Nucleus	ligand-dependent nuclear receptor
	TC170627	CR643744	Tetraodon nigroviridis full-length cDNA	1.971	0.01611	EEPD1		EEPD1	1.971	endonuclease/exonuclease/phosphatase family domain containing 1	Plasma Membrane	other
	TC172493	not-annotated	not-annotated	1.961	0.030213	BAZ2A		BAZ2A	1.961	bromodomain adjacent to zinc finger domain 2A	Nucleus	transcription regulator
	TC140486	BT049670	Salmo salar clone ssal-evf-542-140 Aldose reductase putative mRNA complete cds	1.938	1.6e-05	AKR1B1		AKR1B1	1.938	aldo-keto reductase family 1 member B	Cytoplasm	enzyme
	TC171459	not-annotated	not-annotated	1.932	0.034062	RBL2		RBL2	1.932	RB transcriptional corepressor like 2	Nucleus	other
	TC143468	BT056439	Salmo salar clone ssal-eve-509-328 Eukaryotic translation initiation factor 1A X-chromosomal putative mRNA complete cds	1.931	0.027038	EIF1AX		EIF1AX	1.931	eukaryotic translation initiation factor 1A X-linked	Cytoplasm	translation regulator
	TC143308	AY391406	Danio rerio adducin 3 gamma (ADD3) mRNA complete cds	1.929	0.008297	ADD3		ADD3	1.929	adducin 3	Cytoplasm	other
	TC137930	BT048446	Salmo salar clone ssal-evd-529-350 Annexin A2-A putative mRNA complete cds	1.926	2.9e-05	ANXA2		ANXA2	1.926	annexin A2	Plasma Membrane	other
	TC149738	BT058982	Salmo salar clone ssal-rgf-517-305 N-arachidonyl glycine receptor putative mRNA complete cds	1.912	4.5e-05	GPR18		GPR18	1.912	G protein-coupled receptor 18	Plasma Membrane	G-protein coupled receptor
	TC142819	NM_001139683	Salmo salar protein arginine methyltransferase 1 (prmt1) mRNA_x0001_gb-BT043702.1- Salmo salar clone HM5_2390 protein arginine methyltransferase 1 (prmt1) mRNA complete cds	1.911	3.2e-05	PRMT1		PRMT1	1.911	protein arginine methyltransferase 1	Nucleus	enzyme
	TC169729	not-annotated	not-annotated	1.91	0.002918	MFSD2A		MFSD2A	1.91	major facilitator superfamily domain containing 2A	Plasma Membrane	transporter
	TC153194	NM_001146545	Salmo salar cysteine-rich protein 2 (crip2) mRNA_x0001_gb-BT057381.1- Salmo salar clone ssal-rgb2-504-366 Cysteine-rich protein 2 putative mRNA complete cds	1.906	0.000271	CRIP2		CRIP2	1.906	cysteine rich protein 2	Nucleus	other
	TC140139	not-annotated	not-annotated	1.906	0.046202	POT1		POT1	1.906	protection of telomeres 1	Nucleus	other
	TC152857	BT059476	Salmo salar clone ssal-rgf-536-337 Nattectin precursor putative mRNA complete cds	1.902	0.030819	CEP78		CEP78	1.902	centrosomal protein 78	Cytoplasm	other
	TC137049	NM_001141910	Salmo salar PDZ and LIM domain protein 4 (pdli4) mRNA_x0001_gb-BT044618.1- Salmo salar clone ssal-rgf-001-030 PDZ and LIM domain protein 4 putative mRNA complete cds	1.902	0.000738	PDLIM4		PDLIM4	1.902	PDZ and LIM domain 4	Plasma Membrane	other
	TC148829	not-annotated	not-annotated	1.899	0.025461	SASH1		SASH1	1.899	SAM and SH3 domain containing 1	Extracellular Space	other
	TC141712	BT049176	Salmo salar clone ssal-eve-561-206 Heat shock factor-binding protein 1 putative mRNA complete cds	1.897	0.036965	HSBP1		HSBP1	1.897	heat shock factor binding protein 1	Nucleus	other
	TC151167	AF063216	Oncorhynchus keta insulin-like growth factor I precursor (IGF-I.1) gene complete cds	1.897	8.2e-05	IGF1		IGF1	1.897	insulin like growth factor 1	Extracellular Space	growth factor
	TC150222	not-annotated	not-annotated	1.897	0.000781	SAMD9L		SAMD9L	1.897	sterile alpha motif domain containing 9 like	Extracellular Space	other
	TC152693	XM_422636	PREDICTED: Gallus gallus retinol binding protein 2 cellular (RBP2) mRNA	1.892	0.021254	RBP2		RBP2	1.892	retinol binding protein 2	Cytoplasm	transporter
	TC133243	BT071997	Salmo salar clone ssal-rgf-507-007 E3 ubiquitin-protein ligase HECTD1 putative mRNA partial cds	1.888	0.007023	HECTD1		HECTD1	1.888	HECT domain E3 ubiquitin protein ligase 1	Other	enzyme
	TC164832	XM_003264156	PREDICTED: Nomascus leucogenys angiopoietin-like 2 (ANGPTL2) mRNA	1.886	3.6e-05	ANGPTL2		ANGPTL2	1.886	angiopoietin like 2	Extracellular Space	other
	TC146141	BT059908	Salmo salar clone ssal-rgg-509-006 Cytochrome b-c1 complex subunit 9 putative mRNA complete cds	1.872	0.014876	UQCR10		UQCR10	1.872	ubiquinol-cytochrome c reductase, complex III subunit X	Cytoplasm	enzyme
	TC161634	BT045802	Salmo salar clone ssal-rgf-531-328 TSC22 domain family protein 3 putative mRNA complete cds	1.869	0.000221	TSC22D3		TSC22D3	1.869	TSC22 domain family member 3	Nucleus	transcription regulator
	TC163318	FJ195617	Salmo salar Indian hedgehog mRNA partial cds	1.865	0.014678	SHH		SHH	1.865	sonic hedgehog signaling molecule	Extracellular Space	peptidase
	TC148362	XM_703863	PREDICTED: Danio rerio phosphodiesterase 4B cAMP-specific transcript variant 2 (pde4b) mRNA	1.86	2e-06	PDE4B		PDE4B	1.86	phosphodiesterase 4B	Cytoplasm	enzyme
	TC156274	XM_003199023	PREDICTED: Danio rerio protein tyrosine phosphatase receptor type D a (ptprda) mRNA	1.854	3.5e-05	PTPRF		PTPRF	1.854	protein tyrosine phosphatase receptor type F	Plasma Membrane	phosphatase
	TC146797	NM_001008643	Danio rerio oligonucleotide/oligosaccharide-binding fold containing 2Aa (obfc2aa) mRNA_x0001_gb-BC086713.1- Danio rerio zgc:101644 mRNA (cDNA clone MGC:101644 IMAGE:7225995) complete cds	1.843	0.045913	NABP1		NABP1	1.843	nucleic acid binding protein 1	Nucleus	other
	TC134170	NM_001124445	Oncorhynchus mykiss oocyte protease inhibitor-1 (opi-1) mRNA_x0001_gb-AY094359.1- Oncorhynchus mykiss oocyte protease inhibitor-1 (OPI-1) mRNA complete cds	1.84	0.018001	NID1		NID1	1.84	nidogen 1	Extracellular Space	other
	TC163875	XM_689101	PREDICTED: Danio rerio tumor necrosis factor alpha-induced protein 2-like (LOC565839) mRNA	1.835	0.005001	EXOC3L2		EXOC3L2	1.835	exocyst complex component 3 like 2	Cytoplasm	other
	TC149594	BT072098	Salmo salar clone ssal-rgf-511-219 Matrin-3 putative mRNA pseudogene cds	1.831	0.036606	MATR3		MATR3	1.831	matrin 3	Nucleus	other
	TC145892	BT074169	Oncorhynchus mykiss clone omyk-evo-510-359 Bladder cancer-associated protein putative mRNA complete cds	1.825	0.027982	BLCAP		BLCAP	1.825	BLCAP apoptosis inducing factor	Other	other
	TC159028	NM_001124509	Oncorhynchus mykiss cyclin L1 (LOC100136245) mRNA_x0001_gb-AY606031.1- Oncorhynchus mykiss cyclin L1 mRNA complete cds	1.823	2e-06	KRTAP9-1		KRTAP9-1	1.823	keratin associated protein 9-1	Cytoplasm	other
	TC143978	BT056577	Salmo salar clone ssal-rgb2-607-352 Acidic leucine-rich nuclear phosphoprotein 32 family member B putative mRNA complete cds	1.819	0.025461	ANP32B		ANP32B	1.819	acidic nuclear phosphoprotein 32 family member B	Nucleus	other
	TC136702	BT074223	Oncorhynchus mykiss clone omyk-evo-510-034 Myc protein putative mRNA complete cds	1.815	4e-06	MYC		MYC	1.815	MYC proto-oncogene, bHLH transcription factor	Nucleus	transcription regulator
	TC151250	not-annotated	not-annotated	1.8	0.002632	R3HDM2		R3HDM2	1.8	R3H domain containing 2	Nucleus	other
	TC140354	BT072024	Salmo salar clone ssal-rgf-508-024 Sushi von Willebrand factor type A EGF and pentraxin domain-containing protein 1 precursor putative mRNA pseudogene cds	1.793	8.7e-05	CR1		CR1	1.793	complement C3b/C4b receptor 1 (Knops blood group)	Plasma Membrane	cell surface receptor
	TC149369	NM_001193624	Gallus gallus dishevelled associated activator of morphogenesis 1 (DAAM1) mRNA	1.792	1.1e-05	DAAM1		DAAM1	1.792	dishevelled associated activator of morphogenesis 1	Cytoplasm	other
	TC159135	NM_001140524	Salmo salar Collagenase 3 (mmp13) mRNA_x0001_gb-BT046016.1- Salmo salar clone ssal-rgf-539-134 Collagenase 3 precursor putative mRNA complete cds	1.789	3.9e-05	MMP3		MMP3	1.789	matrix metallopeptidase 3	Extracellular Space	peptidase
	IMM 123	NM_001124607	Oncorhynchus mykiss complement component 8 beta polypeptide (c8b) mRNA_x0001_gb-AF418597.1- Oncorhynchus mykiss complement component C8 beta (C8B) mRNA complete cds	1.785	0.014119	C8B		C8B	1.785	complement C8 beta chain	Extracellular Space	other
	TC155728	NM_001165387	Salmo salar death-associated protein kinase 3 (dapk3) mRNA_x0001_gb-BT058912.1- Salmo salar clone ssal-rgf-512-355 Death-associated protein kinase 3 putative mRNA complete cds	1.784	5.6e-05	DAPK3		DAPK3	1.784	death associated protein kinase 3	Cytoplasm	kinase
	TC167508	EU025716	Salmo salar retinoic acid receptor gamma b (Rargb) gene partial cds; and homeobox protein HoxC13ba (HoxC13ba) homeobox protein HoxC12ba (HoxC12ba) homeobox protein HoxC11ba (HoxC11ba) homeobox protein HoxC10ba (HoxC10ba) homeobox protein HoxC9ba (HoxC9ba) homeobox protein HoxC8ba (HoxC8ba) homeobox protein HoxC6ba (HoxC6ba) homeobox protein HoxC5ba (HoxC5ba) and homeobox protein HoxC4ba (HoxC4ba)…	1.783	0.001252	INTS4		INTS4	1.783	integrator complex subunit 4	Nucleus	other
	TC139360	CR753874	Zebrafish DNA sequence from clone DKEY-11F4 in linkage group 9 complete sequence	1.778	0.035159	STAC3		STAC3	1.778	SH3 and cysteine rich domain 3	Extracellular Space	other
	TC157486	NM_001139940	Salmo salar Cytosolic purine 5-nucleotidase (5ntc) mRNA_x0001_gb-BT044922.1- Salmo salar clone ssal-rgf-507-200 Cytosolic purine 5-nucleotidase putative mRNA complete cds	1.77	0.000287	NT5C2		NT5C2	1.77	5'-nucleotidase, cytosolic II	Cytoplasm	phosphatase
	TC135386	NM_001173741	Salmo salar MCM4 minichromosome maintenance deficient 4 mitotin (S. cerevisiae) (mcm4) mRNA_x0001_gb-BT059391.1- Salmo salar clone ssal-rgf-517-383 DNA replication licensing factor mcm4 putative mRNA complete cds	1.768	0.033426	MCM4		MCM4	1.768	minichromosome maintenance complex component 4	Nucleus	enzyme
	TC164962	BT073751	Oncorhynchus mykiss clone omyk-evo-514-175 Flavin reductase putative mRNA complete cds	1.766	0.023166	NAAA		NAAA	1.766	N-acylethanolamine acid amidase	Cytoplasm	enzyme
	TC154616	not-annotated	not-annotated	1.764	0.03641	THPO		THPO	1.764	thrombopoietin	Extracellular Space	cytokine
	TC166523	AJ300555	Oncorhynchus mykiss mRNA for inducible nitric oxide synthase (iNOS gene)	1.762	0.004912	NOS2		NOS2	1.762	nitric oxide synthase 2	Cytoplasm	enzyme
	TC159868	XM_003264103	PREDICTED: Nomascus leucogenys RING finger and CCCH-type zinc finger domain-containing protein 2-like (LOC100589492) mRNA	1.762	1.4e-05	RC3H2		RC3H2	1.762	ring finger and CCCH-type domains 2	Plasma Membrane	enzyme
	TC161125	BT048374	Salmo salar clone ssal-evf-579-369 Ras-like protein family member 11B putative mRNA complete cds	1.758	0.004263	RERGL		RERGL	1.758	RERG like	Other	other
	TC135510	BT049189	Salmo salar clone ssal-evd-523-154 LBH putative mRNA complete cds	1.753	0.044559	LBH		LBH	1.753	LBH regulator of WNT signaling pathway	Nucleus	transcription regulator
	TC155624	BT049854	Salmo salar clone ssal-sjb-012-243 Gamma-aminobutyric acid receptor-associated protein-like 2 putative mRNA complete cds	1.752	0.002654	GABARAPL2		GABARAPL2	1.752	GABA type A receptor associated protein like 2	Cytoplasm	other
	TC163853	BT045905	Salmo salar clone ssal-rgf-536-147 Proactivator polypeptide precursor putative mRNA complete cds	1.752	0.044553	PSAP		PSAP	1.752	prosaposin	Extracellular Space	enzyme
	TC144460	BT074153	Oncorhynchus mykiss clone omyk-evo-501-104 Sorcin putative mRNA complete cds	1.751	0.049411	SRI		SRI	1.751	sorcin	Cytoplasm	transporter
	TC148233	BT059053	Salmo salar clone ssal-rgf-522-322 AN1-type zinc finger protein 3 putative mRNA complete cds	1.749	0.000573	ZFAND3		ZFAND3	1.749	zinc finger AN1-type containing 3	Other	other
	TC149728	NM_001173763	Salmo salar Septin-8 (sept8) mRNA_x0001_gb-BT059441.1- Salmo salar clone ssal-rgf-535-180 Septin-8 putative mRNA complete cds	1.748	0.0378	SEPT8		SEPTIN8	1.748	septin 8	Extracellular Space	other
	TC148800	NM_001140386	Salmo salar Neuron-specific protein family member 1 (nsg1) mRNA_x0001_gb-BT045771.1- Salmo salar clone ssal-rgf-530-358 Neuron-specific protein family member 1 putative mRNA complete cds	1.748	0.043596	NSG1		NSG1	1.748	neuronal vesicle trafficking associated 1	Cytoplasm	other
	TC135201	BT059793	Salmo salar clone ssal-rgf-503-059 High mobility group protein B3 putative mRNA complete cds	1.746	3e-06	HMGB3		HMGB3	1.746	high mobility group box 3	Nucleus	other
	TC143550	NM_001159671	Mus musculus radial spoke head 6 homolog A (Chlamydomonas) (Rsph6a) transcript variant 2 mRNA	1.743	2e-06	RSPH6A		RSPH6A	1.743	radial spoke head 6 homolog A	Extracellular Space	other
	TC141262	BT125236	Salmo salar clone ssal-rgb2-595-290 Cholesterol 25-hydroxylase-like protein A putative mRNA complete cds	1.736	1e-06	CH25H		CH25H	1.736	cholesterol 25-hydroxylase	Cytoplasm	enzyme
	TC164293	not-annotated	not-annotated	1.735	0.03351	RBBP6		RBBP6	1.735	RB binding protein 6, ubiquitin ligase	Nucleus	enzyme
	TC133928	not-annotated	not-annotated	1.732	0.004194	NT5C1B		NT5C1B	1.732	5'-nucleotidase, cytosolic IB	Cytoplasm	phosphatase
	TC145197	BT043968	Salmo salar clone HM5_1326 AF4/FMR2 family member 3 isoform 2-like mRNA partial cds	1.728	0.00772	AFF3		AFF3	1.728	AF4/FMR2 family member 3	Nucleus	transcription regulator
	TC141893	BT075489	Osmerus mordax clone omor-eva-509-157 VIP peptides precursor putative mRNA complete cds	1.728	0.017023	VIP		VIP	1.728	vasoactive intestinal peptide	Extracellular Space	other
	TC166671	not-annotated	not-annotated	1.721	0.000968	C1orf106		INAVA	1.721	innate immunity activator	Other	other
	TC144076	NM_001141346	Salmo salar CA123 protein (ca123) mRNA_x0001_gb-BT049223.1- Salmo salar clone ssal-eve-539-251 C1orf123 putative mRNA complete cds	1.715	0.036112	C1orf123		CZIB	1.715	CXXC motif containing zinc binding protein	Cytoplasm	other
	TC167087	NM_001140425	Salmo salar Serine protease 23 (prs23) mRNA_x0001_gb-BT045840.1- Salmo salar clone ssal-rgf-534-154 Serine protease 23 precursor putative mRNA complete cds	1.714	0.000168	TPRXL		TPRXL	1.714	tetrapeptide repeat homeobox like (pseudogene)	Other	other
	TC161387	BT073223	Oncorhynchus mykiss clone omyk-evn-503-292 40S ribosomal protein S17 putative mRNA complete cds	1.709	0.022861	RPS17L		RPS17	1.709	ribosomal protein S17	Cytoplasm	other
	TC143330	NM_001173970	Salmo salar Interleukin-31 receptor A (il31r) mRNA_x0001_gb-BT059257.1- Salmo salar clone ssal-rgf-536-369 Interleukin-31 receptor A precursor putative mRNA complete cds	1.707	8.6e-05	CSF3R		CSF3R	1.707	colony stimulating factor 3 receptor	Plasma Membrane	cell surface receptor
	IMM 365	BT057502	Salmo salar clone ssal-rgb2-571-349 Retinol-binding protein I cellular putative mRNA complete cds	1.705	0.018465	RBP1		RBP1	1.705	retinol binding protein 1	Extracellular Space	transporter
	TC161545	NM_001030265	Danio rerio zgc:114107 (zgc:114107) mRNA_x0001_gb-BC097167.1- Danio rerio zgc:114107 mRNA (cDNA clone MGC:114107 IMAGE:7448987) complete cds	1.702	0.000275	UBTD1		UBTD1	1.702	ubiquitin domain containing 1	Other	other
	TC140234	FQ310506	Dicentrarchus labrax chromosome sequence corresponding to linkage group 1 top part complete sequence	1.695	0.026435	UBAP1		UBAP1	1.695	ubiquitin associated protein 1	Cytoplasm	other
	TC140514	BT048693	Salmo salar clone ssal-evd-502-349 Tumor necrosis factor receptor superfamily member 11B precursor putative mRNA complete cds	1.693	0.000213	TNFRSF9		TNFRSF9	1.693	TNF receptor superfamily member 9	Plasma Membrane	cell surface receptor
	TC144728	GU588073	Ictalurus furcatus clone CBZC5179 upf0468 protein c16orf80-like protein (CP080) mRNA complete cds	1.685	2e-06	C16orf80		CFAP20	1.685	cilia and flagella associated protein 20	Cytoplasm	other
	TC143926	not-annotated	not-annotated	1.682	0.000448	TNS4		TNS4	1.682	tensin 4	Cytoplasm	other
	TC156872	NM_001139916	Salmo salar Filamin-binding LIM protein 1 (fbli1) mRNA_x0001_gb-BT044877.1- Salmo salar clone ssal-rgf-506-108 Filamin-binding LIM protein 1 putative mRNA complete cds	1.672	0.002158	FBLIM1		FBLIM1	1.672	filamin binding LIM protein 1	Plasma Membrane	other
	TC149791	not-annotated	not-annotated	1.672	0.002896	MUC16		MUC16	1.672	mucin 16, cell surface associated	Cytoplasm	other
	TC170810	AF500273	Gadus morhua fast skeletal muscle alpha-actin mRNA complete cds	1.67	0.006669	ACTC1		ACTC1	1.67	actin alpha cardiac muscle 1	Cytoplasm	enzyme
	TC142770	BT028526	Gasterosteus aculeatus clone CNB236-G01 mRNA sequence	1.663	0.049018	CHN2		CHN2	1.663	chimerin 2	Cytoplasm	other
	TC148839	BT072658	Salmo salar clone ssal-rgf-535-126 Cysteine-rich protein 3 putative mRNA pseudogene cds	1.663	6.2e-05	CRIP3		CRIP3	1.663	cysteine rich protein 3	Cytoplasm	other
	TC160090	NM_001140382	Salmo salar fibrinogen-like 2 (fgl2) mRNA_x0001_gb-BT045764.1- Salmo salar clone ssal-rgf-530-311 Fibroleukin precursor putative mRNA complete cds	1.659	2.4e-05	FGL2		FGL2	1.659	fibrinogen like 2	Extracellular Space	peptidase
	TC165545	not-annotated	not-annotated	1.649	0.022566	LEO1		LEO1	1.649	LEO1 homolog, Paf1/RNA polymerase II complex component	Nucleus	other
	TC168942	BC154242	Danio rerio cDNA clone IMAGE:5411374	1.649	9e-06	LPHN2		ADGRL2	1.649	adhesion G protein-coupled receptor L2	Plasma Membrane	G-protein coupled receptor
	TC140361	NM_001141677	Salmo salar adenosine monophosphate deaminase 1 (isoform M) (ampd1) mRNA_x0001_gb-BT043506.1- Salmo salar clone HM4_0643 adenosine monophosphate deaminase 1 (ampd1) mRNA complete cds	1.643	0.009672	AMPD1		AMPD1	1.643	adenosine monophosphate deaminase 1	Cytoplasm	enzyme
	TC171616	EU008541	Salmo salar neurogranin TIP41-like protein (TIP41) MHC class II antigen beta chain (Sasa-DBB) MHC class II antigen alpha chain (Sasa-DBA) leucine rich repeat containing 35-like protein and alpha-tectorin-like protein genes complete cds	1.638	0.028874	CCDC78		CCDC78	1.638	coiled-coil domain containing 78	Cytoplasm	other
	TC155998	BT026860	Gasterosteus aculeatus clone CFW73-G09 mRNA sequence	1.638	6.5e-05	LMOD3		LMOD3	1.638	leiomodin 3	Cytoplasm	other
	TC134866	D00531	Oncorhynchus masou mRNA for apopolysialoglycoprotein complete cds	1.638	0.000284	MUC21		MUC21	1.638	mucin 21, cell surface associated	Cytoplasm	other
	TC143513	DQ199618	Paralichthys olivaceus DnaJ-like subfamily A member 4 (Hsp40A4) mRNA complete cds	1.637	2.4e-05	DNAJA4		DNAJA4	1.637	DnaJ heat shock protein family (Hsp40) member A4	Nucleus	other
	TC141632	BT072558	Salmo salar clone ssal-rgf-530-149 CD166 antigen homolog precursor putative mRNA partial cds	1.636	7.4e-05	ALCAM		ALCAM	1.636	activated leukocyte cell adhesion molecule	Plasma Membrane	other
	TC148662	NM_001160487	Oncorhynchus mykiss follistatin-like 3 glycoprotein (LOC100301654) mRNA_x0001_gb-EU285577.1- Oncorhynchus mykiss follistatin-like 3 glycoprotein mRNA complete cds	1.636	0.000112	FSTL3		FSTL3	1.636	follistatin like 3	Extracellular Space	other
	TC165075	BT047672	Salmo salar clone ssal-evd-562-113 Mitochondrial import receptor subunit TOM20 homolog putative mRNA complete cds	1.635	0.01125	TOMM20		TOMM20	1.635	translocase of outer mitochondrial membrane 20	Cytoplasm	transporter
	TC167864	NM_001141460	Salmo salar Tumor-associated calcium signal transducer 2 (tacd2) mRNA_x0001_gb-BT049742.1- Salmo salar clone ssal-evf-545-016 Tumor-associated calcium signal transducer 2 precursor putative mRNA complete cds	1.624	2e-06	TACSTD2		TACSTD2	1.624	tumor associated calcium signal transducer 2	Plasma Membrane	other
	TC164569	NM_001165162	Oncorhynchus mykiss potassium channel tetramerisation domain containing 5 (kctd5) mRNA_x0001_gb-BT074147.1- Oncorhynchus mykiss clone omyk-evo-504-040 BTB/POZ domain-containing protein KCTD5 putative mRNA complete cds	1.623	0.000361	KCTD5		KCTD5	1.623	potassium channel tetramerization domain containing 5	Cytoplasm	other
	TC158202	BT046065	Salmo salar clone ssal-rgf-540-246 Microtubule-associated proteins 1A/1B light chain 3B precursor putative mRNA complete cds	1.621	6.1e-05	MAP1LC3B		MAP1LC3B	1.621	microtubule associated protein 1 light chain 3 beta	Cytoplasm	other
	TC142813	BT059693	Salmo salar clone ssal-rgf-523-191 Activin receptor type-1B precursor putative mRNA complete cds	1.619	0.033047	ACVR1B		ACVR1B	1.619	activin A receptor type 1B	Plasma Membrane	kinase
	TC146139	CU459065	Zebrafish DNA sequence from clone CH211-149K23 in linkage group 16 complete sequence	1.619	0.000533	CDC42EP5		CDC42EP5	1.619	CDC42 effector protein 5	Cytoplasm	other
	TC169976	not-annotated	not-annotated	1.619	8e-06	NHS		NHS	1.619	NHS actin remodeling regulator	Nucleus	other
	TC165366	BT072448	Salmo salar clone ssal-rgf-525-359 Transketolase-like protein 2 putative mRNA partial cds	1.619	0.034472	TKTL2		TKTL2	1.619	transketolase like 2	Cytoplasm	enzyme
	TC160866	NM_001173903	Salmo salar EF-hand domain-containing protein D2 (efhd2) mRNA_x0001_gb-BT059790.1- Salmo salar clone ssal-rgf-503-139 EF-hand domain-containing protein D2 putative mRNA complete cds	1.615	0.020889	EFHD2		EFHD2	1.615	EF-hand domain family member D2	Other	other
	TC163895	NM_001124467	Oncorhynchus mykiss C5a receptor (c5ar) mRNA_x0001_gb-AY366353.1- Oncorhynchus mykiss C5a receptor mRNA complete cds	1.613	7e-06	C5A		-	1.613	-	-	-
	TC134331	NM_001124370	Oncorhynchus mykiss matrix metalloproteinase 9 (mmp9) mRNA_x0001_emb-AJ320533.1- Oncorhynchus mykiss mRNA for matrix metalloproteinase 9 (mmp9 gene)	1.613	0.018898	MMP9		MMP9	1.613	matrix metallopeptidase 9	Extracellular Space	peptidase
	IMM 460	AJ867256	Oncorhynchus mykiss IL11 gene for interleukin-11 exons 1-5	1.613	0.048012	ZNF628		ZNF628	1.613	zinc finger protein 628	Nucleus	transcription regulator
	TC144934	NM_001034174	Danio rerio G protein-coupled receptor 157 (gpr157) mRNA_x0001_gb-BC100046.1- Danio rerio G protein-coupled receptor 157 mRNA (cDNA clone MGC:112049 IMAGE:7409559) complete cds	1.612	0.000918	GPR157		GPR157	1.612	G protein-coupled receptor 157	Plasma Membrane	G-protein coupled receptor
	TC168735	BX465206	Zebrafish DNA sequence from clone DKEYP-25A3 in linkage group 19 Contains the gene for a novel protein (zgc:55580) the gene for a novel protein similar to vertebrate sclerostin domain containing 1 (SOSTDC1) the rbb4 gene for retinoblastoma binding protein 4 the gene for a novel protein similar to vertebrate ankyrin repeat and MYND domain containing 2 (ANKMY2) two novel genes and four CpG islands …	1.603	7e-05	SOSTDC1		SOSTDC1	1.603	sclerostin domain containing 1	Extracellular Space	growth factor
	TC144188	not-annotated	not-annotated	1.6	0.035289	C10orf11		LRMDA	1.6	leucine rich melanocyte differentiation associated	Other	other
	TC172601	not-annotated	not-annotated	1.6	3.3e-05	PML		PML	1.6	promyelocytic leukemia	Nucleus	transcription regulator
	TC134509	not-annotated	not-annotated	1.596	0.000171	C17orf97		C17orf97	1.596	chromosome 17 open reading frame 97	Other	other
	TC168883	NM_001124656	Oncorhynchus mykiss bile salt export pump (abcb11) mRNA_x0001_gb-DQ865266.2- Oncorhynchus mykiss bile salt export pump (Abcb11) mRNA complete cds	1.592	0.000664	ABCB11		ABCB11	1.592	ATP binding cassette subfamily B member 11	Plasma Membrane	transporter
	TC153326	NM_001173600	Salmo salar Interferon regulatory factor 2-binding protein 1 (i2bp1) mRNA_x0001_gb-BT059020.1- Salmo salar clone ssal-rgf-520-248 Interferon regulatory factor 2-binding protein 1 putative mRNA complete cds	1.59	0.016127	IRF2BP1		IRF2BP1	1.59	interferon regulatory factor 2 binding protein 1	Nucleus	transcription regulator
	TC157146	GU480583	Oncorhynchus mykiss multidrug resistance protein 4 (Abcc4) mRNA partial cds	1.589	3.6e-05	ABCC4		ABCC4	1.589	ATP binding cassette subfamily C member 4	Plasma Membrane	transporter
	TC139645	BT047230	Salmo salar clone ssal-sjb-017-163 Regulator of G-protein signaling 1 putative mRNA complete cds	1.582	0.000529	RGS21		RGS21	1.582	regulator of G protein signaling 21	Plasma Membrane	enzyme
	TC161051	XR_054476	PREDICTED: Taeniopygia guttata misc_RNA (LOC100219574) miscRNA	1.58	0.01155	TNC		TNC	1.58	tenascin C	Extracellular Space	other
	TC140471	XM_684152	PREDICTED: Danio rerio ankyrin repeat domain 28 (ankrd28) mRNA	1.578	0.000593	ANKRD28		ANKRD28	1.578	ankyrin repeat domain 28	Cytoplasm	other
	TC156615	FQ312010	Zebrafish DNA sequence from clone CH73-19E6 in linkage group 21 complete sequence	1.576	0.002149	ZBTB16		ZBTB16	1.576	zinc finger and BTB domain containing 16	Nucleus	transcription regulator
	TC134734	XM_691233	PREDICTED: Danio rerio salt-inducible kinase 2b (sik2b) mRNA	1.575	0.032755	SIK2		SIK2	1.575	salt inducible kinase 2	Cytoplasm	kinase
	TC166770	NM_001139776	Salmo salar YQ007 protein (yq007) mRNA_x0001_gb-BT044635.1- Salmo salar clone ssal-rgf-001-207 PKHD domain-containing transmembrane protein FLJ22222 putative mRNA complete cds	1.574	0.001262	OGFOD3		OGFOD3	1.574	2-oxoglutarate and iron dependent oxygenase domain containing 3	Cytoplasm	enzyme
	TC136890	not-annotated	not-annotated	1.574	0.047563	SDSL		SDSL	1.574	serine dehydratase like	Cytoplasm	enzyme
	TC160849	BT072743	Salmo salar clone ssal-rgf-538-365 SAFB-like transcription modulator putative mRNA pseudogene cds	1.572	0.005299	SLTM		SLTM	1.572	SAFB like transcription modulator	Nucleus	other
	TC164056	BT059055	Salmo salar clone ssal-rgf-522-352 Caspase-8 precursor putative mRNA complete cds	1.564	3e-06	CASP9		CASP9	1.564	caspase 9	Cytoplasm	peptidase
	TC165910	EF427379	Salmo salar clone BAC CHORI214-8I14 complete sequence	1.561	3.3e-05	ZBTB22		ZBTB22	1.561	zinc finger and BTB domain containing 22	Nucleus	transcription regulator
	TC169152	NM_001098052	Bos taurus actinin alpha 4 (ACTN4) mRNA_x0001_gb-BC140512.1- Bos taurus actinin alpha 4 mRNA (cDNA clone MGC:138973 IMAGE:8093657) complete cds	1.56	0.01165	ACTN4		ACTN4	1.56	actinin alpha 4	Cytoplasm	transcription regulator
	TC166702	NM_001124615	Oncorhynchus mykiss TNF receptor-associated factor 3 (traf3) mRNA_x0001_emb-AJ517803.1- Oncorhynchus mykiss mRNA for tumour necrosis factor receptor associated factor (traf3 gene)	1.56	0.014333	TRAF3		TRAF3	1.56	TNF receptor associated factor 3	Cytoplasm	enzyme
	TC167917	BC056772	Danio rerio interferon regulatory factor 6 mRNA (cDNA clone MGC:63500 IMAGE:2640695) complete cds	1.555	6.8e-05	IRF6		IRF6	1.555	interferon regulatory factor 6	Nucleus	transcription regulator
	TC147260	NM_001140517	Salmo salar Proteinase-activated receptor 2 (par2) mRNA_x0001_gb-FJ184032.1- Salmo salar proteinase-activated receptor-2b (PAR-2) mRNA complete cds	1.554	2.2e-05	F2RL1		F2RL1	1.554	F2R like trypsin receptor 1	Plasma Membrane	G-protein coupled receptor
	TC147214	NM_001007452	Danio rerio zgc:101614 (zgc:101614) mRNA_x0001_gb-BC085387.1- Danio rerio zgc:101614 mRNA (cDNA clone MGC:101614 IMAGE:7224720) complete cds	1.55	0.002	GNB2		GNB2	1.55	G protein subunit beta 2	Plasma Membrane	enzyme
	TC159246	BT080102	Esox lucius clone eluc-evq-530-368 MARVEL domain-containing protein 1 putative mRNA complete cds	1.55	5e-06	MARVELD1		MARVELD1	1.55	MARVEL domain containing 1	Other	other
	TC141566	BC165046	Danio rerio zgc:56112 mRNA (cDNA clone MGC:192221 IMAGE:100060530) complete cds	1.547	3e-06	CHMP4B		CHMP4B	1.547	charged multivesicular body protein 4B	Cytoplasm	other
	TC133607	not-annotated	not-annotated	1.547	0.031345	TMPRSS4		TMPRSS4	1.547	transmembrane serine protease 4	Cytoplasm	peptidase
	TC138651	XM_692016	PREDICTED: Danio rerio ATPase Ca++ transporting ubiquitous (atp2a3) mRNA	1.534	0.000111	ATP2A1		ATP2A1	1.534	ATPase sarcoplasmic/endoplasmic reticulum Ca2+ transporting 1	Cytoplasm	transporter
	TC142930	XM_001338200	PREDICTED: Danio rerio peroxisome proliferator-activated receptor gamma coactivator-related 1 (pprc1) mRNA	1.532	2.4e-05	PPRC1		PPRC1	1.532	PPARG related coactivator 1	Nucleus	transcription regulator
	TC134867	not-annotated	not-annotated	1.527	0.006052	NUDT18		NUDT18	1.527	nudix hydrolase 18	Cytoplasm	enzyme
	TC171077	NM_001173847	Salmo salar acyl-Coenzyme A oxidase 1 palmitoyl (acox1) mRNA_x0001_gb-BT059635.1- Salmo salar clone ssal-rgf-539-008 Acyl-coenzyme A oxidase 1 peroxisomal putative mRNA complete cds	1.523	0.02025	ACOX1		ACOX1	1.523	acyl-CoA oxidase 1	Cytoplasm	enzyme
	TC169841	HQ287745	Coregonus clupeaformis putative liver carboxylesterase 22 precursor (CE) gene partial cds	1.523	0.040759	CES1		CES1	1.523	carboxylesterase 1	Cytoplasm	enzyme
	TC169124	NM_001124459	Oncorhynchus mykiss Na/K ATPase alpha subunit isoform 1c (LOC100136183) mRNA_x0001_gb-AY319389.1- Oncorhynchus mykiss Na/K ATPase alpha subunit isoform 1c mRNA complete cds	1.522	0.000172	ATP1A1		ATP1A1	1.522	ATPase Na+/K+ transporting subunit alpha 1	Plasma Membrane	transporter
	TC149912	BT028764	Gasterosteus aculeatus clone CNB300-F03 mRNA sequence	1.518	8e-06	SEC23B		SEC23B	1.518	SEC23 homolog B, COPII coat complex component	Extracellular Space	transporter
	TC132519	not-annotated	not-annotated	1.517	0.000324	FITM2		FITM2	1.517	fat storage inducing transmembrane protein 2	Cytoplasm	other
	TC166573	BT072384	Salmo salar clone ssal-rgf-523-177 MCM10 homolog putative mRNA pseudogene cds	1.517	3e-06	MCM10		MCM10	1.517	minichromosome maintenance 10 replication initiation factor	Nucleus	other
	TC141711	NM_001173590	Salmo salar Transmembrane protein 179 (tm179) mRNA_x0001_gb-BT059002.1- Salmo salar clone ssal-rgf-519-027 Transmembrane protein 179 putative mRNA complete cds	1.515	6.7e-05	TMEM179		TMEM179	1.515	transmembrane protein 179	Other	other
	TC161475	NM_001139814	Salmo salar archease (arch) mRNA_x0001_gb-BT044713.1- Salmo salar clone ssal-rgf-501-249 archease putative mRNA complete cds	1.514	0.000217	ZBTB8OS		ZBTB8OS	1.514	zinc finger and BTB domain containing 8 opposite strand	Cytoplasm	other
	TC161055	BT076129	Caligus rogercresseyi clone crog-evp-503-093 Chloride intracellular channel protein 2 putative mRNA complete cds	1.511	1.2e-05	CLIC2		CLIC2	1.511	chloride intracellular channel 2	Cytoplasm	enzyme
	TC166888	XR_117642	PREDICTED: Danio rerio metabotropic glutamate receptor 8-like (LOC792371) miscRNA	1.509	0.049721	GRM8		GRM8	1.509	glutamate metabotropic receptor 8	Plasma Membrane	G-protein coupled receptor
	TC137826	NM_199707	Danio rerio elongation factor RNA polymerase II (ell) mRNA_x0001_gb-BC058072.1- Danio rerio elongation factor RNA polymerase II mRNA (cDNA clone MGC:63836 IMAGE:3817105) complete cds	1.5	0.000111	ELL		ELL	1.5	elongation factor for RNA polymerase II	Nucleus	transcription regulator
	TC139303	BT071914	Salmo salar clone ssal-rgf-503-225 Coagulation factor V precursor putative mRNA pseudogene cds	1.498	0.00141	F5		F5	1.498	coagulation factor V	Extracellular Space	other
	TC164353	BC075904	Danio rerio RasGEF domain family member 1Ba mRNA (cDNA clone MGC:92145 IMAGE:7049522) complete cds	1.491	2.2e-05	RASGEF1B		RASGEF1B	1.491	RasGEF domain family member 1B	Other	other
	TC155166	CR749178	Zebrafish DNA sequence from clone DKEY-220H13 in linkage group 21 complete sequence	1.491	0.001068	SUPT6H		SUPT6H	1.491	SPT6 homolog, histone chaperone and transcription elongation factor	Nucleus	transcription regulator
	TC164522	not-annotated	not-annotated	1.489	0.011382	IQSEC1		IQSEC1	1.489	IQ motif and Sec7 domain ArfGEF 1	Cytoplasm	other
	TC170111	BC135020	Danio rerio microsomal triglyceride transfer protein mRNA (cDNA clone MGC:162558 IMAGE:7165324) complete cds	1.485	0.005142	MTTP		MTTP	1.485	microsomal triglyceride transfer protein	Cytoplasm	transporter
	TC154365	not-annotated	not-annotated	1.485	0.020046	NCDN		NCDN	1.485	neurochondrin	Cytoplasm	other
	TC165847	not-annotated	not-annotated	1.485	0.00015	PRB3		PRB3	1.485	proline rich protein BstNI subfamily 3	Other	other
	TC168470	XM_689200	PREDICTED: Danio rerio thyroglobulin (tg) mRNA	1.484	0.027136	TG		TG	1.484	thyroglobulin	Extracellular Space	other
	TC156233	NM_001145563	Danio rerio sphingomyelin synthase 2 (sgms2) mRNA	1.483	2.8e-05	SGMS2		SGMS2	1.483	sphingomyelin synthase 2	Plasma Membrane	enzyme
	TC166663	AC187702	Gasterosteus aculeatus clone VMRC26-150C14 complete sequence	1.482	4e-06	CXCR7		ACKR3	1.482	atypical chemokine receptor 3	Plasma Membrane	G-protein coupled receptor
	TC154299	NM_001141803	Salmo salar GTPase activating protein (SH3 domain) binding protein 2 (g3bp2) mRNA_x0001_gb-BT045877.1- Salmo salar clone ssal-rgf-535-191 Ras GTPase-activating protein-binding protein 2 putative mRNA complete cds	1.48	7.8e-05	G3BP1		G3BP1	1.48	G3BP stress granule assembly factor 1	Nucleus	enzyme
	TC148823	BT058825	Salmo salar clone ssal-rgf-505-278 Cryptochrome-1 putative mRNA complete cds	1.478	0.000181	CRY1		CRY1	1.478	cryptochrome circadian regulator 1	Nucleus	enzyme
	IMM 236	DQ156149	Salmo salar clone BAC S0085O16 partial sequence	1.478	0.040806	HERPUD1		HERPUD1	1.478	homocysteine inducible ER protein with ubiquitin like domain 1	Cytoplasm	other
	TC151753	not-annotated	not-annotated	1.473	0.025646	BAG6		BAG6	1.473	BAG cochaperone 6	Nucleus	enzyme
	TC171354	NM_001140401	Salmo salar calponin 2 (cnn2) mRNA_x0001_gb-BT045796.1- Salmo salar clone ssal-rgf-531-216 Calponin-2 putative mRNA complete cds	1.47	0.000112	CNN2		CNN2	1.47	calponin 2	Cytoplasm	other
	TC149055	BT078933	Esox lucius clone eluc-evq-536-198 S100-P putative mRNA complete cds	1.465	0.007814	S100P		S100P	1.465	S100 calcium binding protein P	Cytoplasm	other
	TC151027	not-annotated	not-annotated	1.464	0.018393	C6orf136		C6orf136	1.464	chromosome 6 open reading frame 136	Cytoplasm	other
	TC163093	BC044337	Danio rerio myocyte enhancer factor 2a mRNA (cDNA clone MGC:55208 IMAGE:3818991) complete cds	1.462	0.001475	MEF2A		MEF2A	1.462	myocyte enhancer factor 2A	Nucleus	transcription regulator
	TC138418	NM_001165209	Oncorhynchus mykiss Tumor suppressor candidate 2 (tusc2) mRNA_x0001_gb-BT074316.1- Oncorhynchus mykiss clone omyk-evo-508-281 Tumor suppressor candidate 2 putative mRNA complete cds	1.461	0.000234	TUSC2		TUSC2	1.461	tumor suppressor 2, mitochondrial calcium regulator	Nucleus	other
	TC149540	NM_001165041	Oncorhynchus mykiss programmed cell death 6 (LOC100305136) mRNA_x0001_gb-FJ591154.1- Oncorhynchus mykiss programmed cell death 6 mRNA complete cds	1.457	1.4e-05	PDCD6		PDCD6	1.457	programmed cell death 6	Cytoplasm	other
	TC167973	BT072492	Salmo salar clone ssal-rgf-527-224 unknown large open reading frame mRNA novel cds	1.456	0.000194	PIEZO2		PIEZO2	1.456	piezo type mechanosensitive ion channel component 2	Other	ion channel
	TC168665	BT058930	Salmo salar clone ssal-rgf-514-096 Ankyrin repeat domain-containing protein 10 putative mRNA complete cds	1.449	0.001398	ANKRD10		ANKRD10	1.449	ankyrin repeat domain 10	Nucleus	transcription regulator
	TC160057	FQ310508	Dicentrarchus labrax chromosome sequence corresponding to linkage group 18 complete sequence	1.445	0.00172	MTRR		MTRR	1.445	5-methyltetrahydrofolate-homocysteine methyltransferase reductase	Cytoplasm	enzyme
	TC161937	not-annotated	not-annotated	1.444	0.000506	GPA33		GPA33	1.444	glycoprotein A33	Plasma Membrane	other
	TC153762	NM_001141024	Salmo salar Heat shock protein Hsp-16.1/Hsp-16.11 (hsp11) mRNA	1.443	0.003696	HSPB8		HSPB8	1.443	heat shock protein family B (small) member 8	Cytoplasm	kinase
	TC170621	BT072243	Salmo salar clone ssal-rgf-518-093 Proto-oncogene vav putative mRNA pseudogene cds	1.442	3.4e-05	VAV1		VAV1	1.442	vav guanine nucleotide exchange factor 1	Nucleus	transcription regulator
	TC164778	NM_200444	Danio rerio Rho GTPase activating protein 4a (arhgap4a) mRNA_x0001_gb-BC054931.1- Danio rerio zgc:63672 mRNA (cDNA clone MGC:63672 IMAGE:5913725) complete cds	1.439	0.000733	SRGAP3		SRGAP3	1.439	SLIT-ROBO Rho GTPase activating protein 3	Cytoplasm	other
	TC172209	BC153555	Danio rerio methyl-CpG binding domain protein 2 mRNA (cDNA clone MGC:174294 IMAGE:8811863) complete cds	1.438	1e-05	MBD2		MBD2	1.438	methyl-CpG binding domain protein 2	Nucleus	transcription regulator
	TC142351	XM_001368156	PREDICTED: Monodelphis domestica similar to C-src tyrosine kinase (LOC100021766) mRNA	1.43	4.6e-05	BHLHE22		BHLHE22	1.43	basic helix-loop-helix family member e22	Nucleus	transcription regulator
	TC171073	NM_001139843	Salmo salar Vesicle-fusing ATPase (nsf) mRNA_x0001_gb-BT044753.1- Salmo salar clone ssal-rgf-502-247 Vesicle-fusing ATPase putative mRNA complete cds	1.423	0.007585	NSF		NSF	1.423	N-ethylmaleimide sensitive factor, vesicle fusing ATPase	Cytoplasm	transporter
	TC136201	CR711487	Tetraodon nigroviridis full-length cDNA	1.422	4.2e-05	PPP6R3		PPP6R3	1.422	protein phosphatase 6 regulatory subunit 3	Cytoplasm	other
	TC167624	NM_001045019	Danio rerio TCDD-inducible poly(ADP-ribose) polymerase (tiparp) mRNA	1.422	7e-06	TIPARP		TIPARP	1.422	TCDD inducible poly(ADP-ribose) polymerase	Nucleus	enzyme
	TC165142	NM_001173919	Salmo salar 3-hydroxy-3-methylglutaryl-coenzyme A reductase (hmdh) mRNA_x0001_gb-BT058953.1- Salmo salar clone ssal-rgf-515-333 3-hydroxy-3-methylglutaryl-coenzyme A reductase putative mRNA complete cds	1.42	0.001086	HMGCR		HMGCR	1.42	3-hydroxy-3-methylglutaryl-CoA reductase	Cytoplasm	enzyme
	TC140192	BT072357	Salmo salar clone ssal-rgf-522-218 Inositol hexakisphosphate kinase 2 putative mRNA pseudogene cds	1.42	0.000251	IP6K2		IP6K2	1.42	inositol hexakisphosphate kinase 2	Cytoplasm	kinase
	TC146479	AF502957	Oncorhynchus kisutch adipose glucose transporter mRNA complete cds	1.418	0.002246	SLC2A4		SLC2A4	1.418	solute carrier family 2 member 4	Plasma Membrane	transporter
	TC160975	AC189974	Gasterosteus aculeatus clone VMRC28-91C03 complete sequence	1.413	2.4e-05	ABL1		ABL1	1.413	ABL proto-oncogene 1, non-receptor tyrosine kinase	Nucleus	kinase
	TC147921	NM_001141265	Salmo salar RAS and EF-hand domain-containing protein (rasef) mRNA_x0001_gb-BT048847.1- Salmo salar clone ssal-evd-546-053 RAS and EF-hand domain-containing protein putative mRNA complete cds	1.41	0.047458	RASEF		RASEF	1.41	RAS and EF-hand domain containing	Cytoplasm	other
	TC139045	BC165187	Danio rerio sperm associated antigen 6 mRNA (cDNA clone MGC:193049 IMAGE:100060672) complete cds	1.409	0.027781	SPAG6		SPAG6	1.409	sperm associated antigen 6	Cytoplasm	other
	TC133329	XM_684379	PREDICTED: Danio rerio ethanolamine kinase 1 transcript variant 1 (etnk1) mRNA	1.406	0.000333	ETNK1		ETNK1	1.406	ethanolamine kinase 1	Cytoplasm	kinase
	TC167794	NM_001173917	Salmo salar C-terminal binding protein 2 (ctbp2) mRNA_x0001_gb-BT059703.1- Salmo salar clone ssal-rgf-517-331 C-terminal-binding protein 2 putative mRNA complete cds	1.405	8.6e-05	CTBP1		CTBP1	1.405	C-terminal binding protein 1	Nucleus	enzyme
	TC138716	NM_001173578	Salmo salar SMEK homolog 2 suppressor of mek1 (Dictyostelium) (smek2) mRNA_x0001_gb-BT058971.1- Salmo salar clone ssal-rgf-517-082 SMEK homolog 2 putative mRNA complete cds	1.404	0.023184	SMEK2		PPP4R3B	1.404	protein phosphatase 4 regulatory subunit 3B	Nucleus	other
	TC148140	BT027083	Gasterosteus aculeatus clone CFW166-D02 mRNA sequence	1.4	0.035554	SMYD1		SMYD1	1.4	SET and MYND domain containing 1	Nucleus	transcription regulator
	TC153190	NM_001139685	Salmo salar betaine-homocysteine methyltransferase (bhmt) mRNA_x0001_gb-BT043706.1- Salmo salar clone HM5_2534 betaine-homocysteine methyltransferase (bhmt) mRNA complete cds	1.395	0.003427	BHMT		BHMT	1.395	betaine--homocysteine S-methyltransferase	Cytoplasm	enzyme
	TC170681	CU929133	Zebrafish DNA sequence from clone CH73-111K22 in linkage group 20 complete sequence	1.395	0.000684	CLEC11A		CLEC11A	1.395	C-type lectin domain containing 11A	Extracellular Space	growth factor
	TC132874	XM_001337469	PREDICTED: Danio rerio cyclin-J-like (LOC100001904) mRNA	1.392	0.03105	CCNJ		CCNJ	1.392	cyclin J	Nucleus	other
	TC150475	NM_201109	Danio rerio musashi homolog 2b (Drosophila) (msi2b) mRNA_x0001_gb-BC055251.1- Danio rerio musashi homolog 2b (Drosophila) mRNA (cDNA clone MGC:63812 IMAGE:3815670) complete cds	1.388	0.00338	MSI2		MSI2	1.388	musashi RNA binding protein 2	Cytoplasm	other
	TC165652	not-annotated	not-annotated	1.388	0.000458	TNK2		TNK2	1.388	tyrosine kinase non receptor 2	Cytoplasm	kinase
	TC153743	BT072014	Salmo salar clone ssal-rgf-507-189 Neuronal pentraxin-1 precursor putative mRNA partial cds	1.385	0.002684	NPTX1		NPTX1	1.385	neuronal pentraxin 1	Extracellular Space	other
	TC167577	XR_026874	PREDICTED: Gallus gallus similar to KIAA1867 protein (LOC419719) mRNA	1.383	0.043251	KIRREL3		KIRREL3	1.383	kirre like nephrin family adhesion molecule 3	Extracellular Space	other
	TC151929	NM_001141496	Salmo salar enkurin TRPC channel interacting protein (enkur) mRNA_x0001_gb-BT049878.1- Salmo salar clone ssal-evf-507-100 Enkurin putative mRNA complete cds	1.381	0.030477	ENKUR		ENKUR	1.381	enkurin, TRPC channel interacting protein	Cytoplasm	other
	TC154245	XM_686199	PREDICTED: Danio rerio im:7162646 (im:7162646) mRNA	1.381	0.000558	SLC12A4		SLC12A4	1.381	solute carrier family 12 member 4	Plasma Membrane	transporter
	TC170277	BT049750	Salmo salar clone ssal-eve-527-342 Steroid receptor RNA activator 1 putative mRNA complete cds	1.381	3.7e-05	SRA1		SRA1	1.381	steroid receptor RNA activator 1	Nucleus	transcription regulator
	TC136556	NM_200108	Danio rerio zinc finger protein 395 (znf395) mRNA_x0001_gb-BC045305.1- Danio rerio zinc finger protein 395 mRNA (cDNA clone MGC:55309 IMAGE:2600536) complete cds	1.379	0.00389	FAM49A		CYRIA	1.379	CYFIP related Rac1 interactor A	Other	other
	TC166070	NM_001141730	Salmo salar NEDD4 family-interacting protein 2 (nfip2) mRNA_x0001_gb-BT044957.1- Salmo salar clone ssal-rgf-508-169 NEDD4 family-interacting protein 2 putative mRNA complete cds	1.379	0.015007	NDFIP2		NDFIP2	1.379	Nedd4 family interacting protein 2	Cytoplasm	other
	TC168126	NM_200008	Danio rerio pancreatic progenitor cell differentiation and proliferation factor b (ppdpfb) mRNA_x0001_gb-BC059699.1- Danio rerio c20orf149 homolog (H. sapiens) b mRNA (cDNA clone MGC:73395 IMAGE:4787352) complete cds	1.376	0.008046	PPDPF		PPDPF	1.376	pancreatic progenitor cell differentiation and proliferation factor	Other	other
	TC139318	HM159469	Salmo salar clone BAC 33H18 orphan nuclear receptor Dax-1 (Dax1) gene complete cds; and X-linked interleukin-1 receptor accessory protein-like 1 precursor (IL1RAPL-1) pseudogene complete sequence	1.375	0.001901	IL1RAPL1		IL1RAPL1	1.375	interleukin 1 receptor accessory protein like 1	Plasma Membrane	cell surface receptor
	TC137987	NM_001140535	Salmo salar lipase hormone-sensitive (lipe) mRNA_x0001_gb-BT046037.1- Salmo salar clone ssal-rgf-539-381 Endothelial lipase precursor putative mRNA complete cds	1.372	6.6e-05	LIPG		LIPG	1.372	lipase G, endothelial type	Extracellular Space	enzyme
	TC166185	GU130436	Gasterosteus aculeatus clone BAC CHORI215-217N05 genomic sequence	1.37	2.5e-05	LARP1		LARP1	1.37	La ribonucleoprotein 1, translational regulator	Cytoplasm	translation regulator
	TC138945	not-annotated	not-annotated	1.368	0.035447	MOCS1		MOCS1	1.368	molybdenum cofactor synthesis 1	Cytoplasm	other
	TC142665	NM_001004993	Xenopus (Silurana) tropicalis NIPA-like domain containing 4 (nipal4) mRNA_x0001_gb-BC075570.1- Xenopus tropicalis MGC89537 protein mRNA (cDNA clone MGC:89537 IMAGE:6993217) complete cds	1.364	0.004659	NIPAL1		NIPAL1	1.364	NIPA like domain containing 1	Cytoplasm	other
	TC136586	XM_002663812	PREDICTED: Danio rerio macrophage stimulating 1 receptor (c-met-related tyrosine kinase) b (mst1rb) mRNA	1.358	0.000107	MET		MET	1.358	MET proto-oncogene, receptor tyrosine kinase	Plasma Membrane	kinase
	CUST_25_PI425348775	SMAD3	0	1.357	0.021436	SMAD3		SMAD3	1.357	SMAD family member 3	Nucleus	transcription regulator
	TC166963	BT072526	Salmo salar clone ssal-rgf-528-347 MAP kinase-activated protein kinase 3 putative mRNA pseudogene cds	1.355	6.7e-05	CHST15		CHST15	1.355	carbohydrate sulfotransferase 15	Plasma Membrane	enzyme
	TC141401	NM_001140270	Salmo salar Mps one binder kinase activator-like 1A (mol1a) mRNA_x0001_gb-BT045557.1- Salmo salar clone ssal-rgf-524-342 Mps one binder kinase activator-like 1A putative mRNA complete cds	1.354	0.014184	MOB1B		MOB1B	1.354	MOB kinase activator 1B	Cytoplasm	other
	TC145080	BT059368	Salmo salar clone ssal-rgf-510-150 Elongation factor 1-alpha oocyte form putative mRNA complete cds	1.353	1e-05	EEF1A1		EEF1A1	1.353	eukaryotic translation elongation factor 1 alpha 1	Cytoplasm	translation regulator
	TC158588	BT078808	Esox lucius clone eluc-evq-516-039 Epithelial membrane protein 2 putative mRNA complete cds	1.352	0.000122	EMP2		EMP2	1.352	epithelial membrane protein 2	Plasma Membrane	other
	TC145490	GQ505860	Salmo salar clone BAC CHORI214-68O19 genomic sequence	1.351	0.020582	KIF5C		KIF5C	1.351	kinesin family member 5C	Cytoplasm	enzyme
	TC142960	BT059482	Salmo salar clone ssal-rgf-529-375 Leupaxin putative mRNA complete cds	1.351	0.03077	LPXN		LPXN	1.351	leupaxin	Cytoplasm	transcription regulator
	TC147903	BT072377	Salmo salar clone ssal-rgf-523-022 Eukaryotic initiation factor 4A-I putative mRNA pseudogene cds	1.348	0.023455	EIF4A2		EIF4A2	1.348	eukaryotic translation initiation factor 4A2	Cytoplasm	translation regulator
	TC170335	BT047738	Salmo salar clone ssal-sjb-017-109 C1orf93 homolog putative mRNA complete cds	1.346	0.000298	FAM213B		PRXL2B	1.346	peroxiredoxin like 2B	Cytoplasm	enzyme
	TC151083	EU816603	Salmo salar clone BAC S0142M23 complete sequence	1.345	5.4e-05	TIMM44		TIMM44	1.345	translocase of inner mitochondrial membrane 44	Cytoplasm	transporter
	TC155313	NM_001025182	Danio rerio syntaxin binding protein 1a (stxbp1a) mRNA_x0001_gb-BC097221.1- Danio rerio syntaxin binding protein 1 mRNA (cDNA clone MGC:114171 IMAGE:7430225) complete cds	1.343	0.005169	STXBP1		STXBP1	1.343	syntaxin binding protein 1	Cytoplasm	transporter
	TC132999	NM_001124481	Oncorhynchus mykiss zinc/iron-regulated protein (zip1) mRNA_x0001_gb-AY387045.1- Oncorhynchus mykiss zinc/iron-regulated protein (ZIP1) mRNA complete cds	1.341	0.00012	SLC39A1		SLC39A1	1.341	solute carrier family 39 member 1	Plasma Membrane	transporter
	TC142582	BT047838	Salmo salar clone ssal-plnb-025-105 NHP2-like protein 1 putative mRNA complete cds	1.339	4e-05	NHP2L1		SNU13	1.339	small nuclear ribonucleoprotein 13	Nucleus	other
	TC166867	NM_001139709	Salmo salar aldolase a fructose-bisphosphate 1 (LOC100194624) mRNA_x0001_gb-BT043789.1- Salmo salar clone HM5_3082 aldolase a fructose-bisphosphate 1 mRNA complete cds	1.337	0.0497	ALDOA		ALDOA	1.337	aldolase, fructose-bisphosphate A	Cytoplasm	enzyme
	TC170902	not-annotated	not-annotated	1.336	0.002013	P2RX5		P2RX5	1.336	purinergic receptor P2X 5	Plasma Membrane	ion channel
	IMM 571	NM_001124533	Oncorhynchus mykiss CTLA4-like protein (LOC100136275) mRNA_x0001_gb-AY789436.1- Oncorhynchus mykiss CTLA4-like protein mRNA complete cds	1.334	0.000259	CTLA4		CTLA4	1.334	cytotoxic T-lymphocyte associated protein 4	Plasma Membrane	cell surface receptor
	TC144376	BC165170	Danio rerio zgc:103421 mRNA (cDNA clone MGC:193032 IMAGE:100060655) complete cds	1.334	0.036164	FIP1L1		FIP1L1	1.334	factor interacting with PAPOLA and CPSF1	Nucleus	other
	TC166442	AC186558	Gasterosteus aculeatus clone VMRC26-150D01 complete sequence	1.334	4.8e-05	PODXL		PODXL	1.334	podocalyxin like	Plasma Membrane	kinase
	TC153382	NM_001200341	Ictalurus punctatus wnt1-inducible-signaling pathway protein 1 (wisp1) mRNA_x0001_gb-GU588470.1- Ictalurus punctatus clone CBPN25065 wnt1-inducible-signaling pathway protein 1 (WISP1) mRNA complete cds	1.332	0.007016	WISP1		CCN4	1.332	cellular communication network factor 4	Extracellular Space	other
	TC156764	BT046203	Salmo salar clone ssal-eve-578-149 Vacuolar ATP synthase subunit e 1 putative mRNA complete cds	1.331	0.003717	ATP6V0E1		ATP6V0E1	1.331	ATPase H+ transporting V0 subunit e1	Cytoplasm	transporter
	TC132481	NM_001124563	Oncorhynchus mykiss connexin 43 (cx43) mRNA_x0001_gb-DQ204869.1- Oncorhynchus mykiss connexin 43 (Cx43) mRNA complete cds	1.331	0.000286	GJA1		GJA1	1.331	gap junction protein alpha 1	Plasma Membrane	transporter
	TC168874	NM_001173711	Salmo salar ERBB receptor feedback inhibitor 1 (errfi) mRNA_x0001_gb-BT059301.1- Salmo salar clone ssal-rgf-540-055 ERBB receptor feedback inhibitor 1 putative mRNA complete cds	1.33	6.6e-05	ERRFI1		ERRFI1	1.33	ERBB receptor feedback inhibitor 1	Cytoplasm	other
	TC136143	BC097075	Danio rerio hippocampus abundant transcript 1b mRNA (cDNA clone MGC:114002 IMAGE:2600163) complete cds	1.328	0.049915	HIAT1		MFSD14A	1.328	major facilitator superfamily domain containing 14A	Other	transporter
	TC140209	XM_002662877	PREDICTED: Danio rerio SIN3 homolog A transcription regulator (yeast) b (sin3ab) mRNA	1.327	0.0208	SIN3A		SIN3A	1.327	SIN3 transcription regulator family member A	Nucleus	transcription regulator
	TC138139	XM_003200523	PREDICTED: Danio rerio hypothetical protein LOC100537908 (LOC100537908) mRNA	1.327	0.043938	SMIM13		SMIM13	1.327	small integral membrane protein 13	Other	other
	TC134992	NM_001141485	Salmo salar cysteine and glycine-rich protein 3 (cardiac LIM protein) (csrp3) mRNA_x0001_gb-BT049834.1- Salmo salar clone ssal-evd-530-178 Cysteine and glycine-rich protein 3 putative mRNA complete cds	1.323	0.011627	CSRP3		CSRP3	1.323	cysteine and glycine rich protein 3	Nucleus	other
	TC141653	DQ025606	Oncorhynchus tshawytscha clone Ots.DRB1.15.60 genomic sequence	1.321	9e-06	RBM45		RBM45	1.321	RNA binding motif protein 45	Cytoplasm	other
	TC147307	not-annotated	not-annotated	1.317	0.013614	ZNF471		ZNF471	1.317	zinc finger protein 471	Nucleus	transcription regulator
	TC162608	BT072631	Salmo salar clone ssal-rgf-534-010 La-related protein 6 putative mRNA pseudogene cds	1.316	0.00037	LARP6		LARP6	1.316	La ribonucleoprotein 6, translational regulator	Cytoplasm	other
	TC152900	DQ143971	Dissostichus mawsoni gamma S1 crystallin mRNA complete cds	1.313	0.00101	CRYGB		CRYGB	1.313	crystallin gamma B	Nucleus	other
	TC141973	NM_001141431	Salmo salar regulator of G-protein signaling 16 (rgs16) mRNA_x0001_gb-BT049577.1- Salmo salar clone ssal-rgb2-557-192 Regulator of G-protein signaling 16 putative mRNA complete cds	1.31	0.016357	RGS16		RGS16	1.31	regulator of G protein signaling 16	Cytoplasm	enzyme
	TC167900	NM_001173874	Salmo salar FXYD domain containing ion transport regulator 6 (fxyd6) mRNA_x0001_gb-BT059723.1- Salmo salar clone ssal-rgf-002-208 FXYD domain-containing ion transport regulator 6 precursor putative mRNA complete cds	1.309	0.001706	FXYD6		FXYD6	1.309	FXYD domain containing ion transport regulator 6	Plasma Membrane	ion channel
	TC167397	not-annotated	not-annotated	1.307	0.028025	EMILIN2		EMILIN2	1.307	elastin microfibril interfacer 2	Extracellular Space	other
	TC162283	NM_001124237	Oncorhynchus mykiss sex hormone-binding globulin (LOC100135850) mRNA_x0001_dbj-AB243054.1- Oncorhynchus mykiss mRNA for sex hormone-binding globulin complete cds	1.306	0.018452	RPL3		RPL3	1.306	ribosomal protein L3	Nucleus	other
	TC156051	CR708573	Tetraodon nigroviridis full-length cDNA	1.305	0.008738	FBXL3		FBXL3	1.305	F-box and leucine rich repeat protein 3	Nucleus	enzyme
	TC139717	NM_001124276	Oncorhynchus mykiss glucose transporter 1A (glut1a) mRNA_x0001_gb-AF247728.1-AF247728 Oncorhynchus mykiss glucose transporter 1A mRNA complete cds	1.304	5.7e-05	SLC2A1		SLC2A1	1.304	solute carrier family 2 member 1	Plasma Membrane	transporter
	TC159631	BT057205	Salmo salar clone ssal-evd-533-068 C21orf51 putative mRNA complete cds	1.304	6.5e-05	SMIM11		SMIM11A	1.304	small integral membrane protein 11A	Plasma Membrane	other
	CUST_34_PI425348775	IL-2Rgamma2	0	1.302	6.4e-05	IL2RG		IL2RG	1.302	interleukin 2 receptor subunit gamma	Plasma Membrane	cell surface receptor
	TC151769	NM_001140228	Salmo salar DNA-directed RNA polymerase III subunit RPC4 (rpc4) mRNA_x0001_gb-BT045461.1- Salmo salar clone ssal-rgf-522-073 DNA-directed RNA polymerase III subunit RPC4 putative mRNA complete cds	1.299	0.036506	POLR3D		POLR3D	1.299	RNA polymerase III subunit D	Nucleus	transcription regulator
	TC167148	BT030700	Bos taurus hydroxy-delta-5-steroid dehydrogenase 3 beta- and steroid delta-isomerase 7 (HSD3B7) mRNA complete cds	1.297	3.6e-05	HSD3B7		HSD3B7	1.297	hydroxy-delta-5-steroid dehydrogenase, 3 beta- and steroid delta-isomerase 7	Cytoplasm	enzyme
	TC155470	NM_001140569	Salmo salar Synuclein (syu) mRNA_x0001_gb-BT046103.1- Salmo salar clone ssal-rgf-541-255 Synuclein putative mRNA complete cds	1.297	0.020014	SNCG		SNCG	1.297	synuclein gamma	Cytoplasm	other
	TC158167	BT073341	Oncorhynchus mykiss clone omyk-evn-512-056 Ubiquitin-like protein FUBI putative mRNA complete cds	1.294	0.000114	FAU		FAU	1.294	FAU ubiquitin like and ribosomal protein S30 fusion	Cytoplasm	other
	TC162200	BT071857	Salmo salar clone ssal-rgf-002-249 Transmembrane emp24 domain-containing protein 10 precursor putative mRNA partial cds	1.293	0.000946	TMED10		TMED10	1.293	transmembrane p24 trafficking protein 10	Cytoplasm	transporter
	TC153799	BC165880	Danio rerio 4-hydroxyphenylpyruvate dioxygenase mRNA (cDNA clone MGC:192968 IMAGE:100061460) complete cds	1.292	0.023699	HPD		HPD	1.292	4-hydroxyphenylpyruvate dioxygenase	Cytoplasm	enzyme
	TC135580	NM_001141776	Salmo salar Geranylgeranyl pyrophosphate synthetase (ggpps) mRNA_x0001_gb-BT045593.1- Salmo salar clone ssal-rgf-525-353 Geranylgeranyl pyrophosphate synthetase putative mRNA complete cds	1.289	3.2e-05	GGPS1		GGPS1	1.289	geranylgeranyl diphosphate synthase 1	Cytoplasm	enzyme
	TC143985	BT045839	Salmo salar clone ssal-rgf-534-131 Nicotinic acid receptor 1 putative mRNA complete cds	1.286	7.5e-05	HCAR2		HCAR2	1.286	hydroxycarboxylic acid receptor 2	Plasma Membrane	G-protein coupled receptor
	TC153285	NM_001080064	Danio rerio inositol polyphosphate multikinase b (ipmkb) mRNA_x0001_gb-BC128841.1- Danio rerio zgc:158331 mRNA (cDNA clone MGC:158331 IMAGE:7060161) complete cds	1.283	0.009271	IPMK		IPMK	1.283	inositol polyphosphate multikinase	Nucleus	kinase
	TC164216	BT050323	Salmo salar clone ssal-rgb2-608-010 60S ribosomal protein L36a putative mRNA complete cds	1.282	0.045535	RPL36A		RPL36A	1.282	ribosomal protein L36a	Cytoplasm	other
	TC142784	AF256661	Salmo salar clone BHMS111 microsatellite sequence	1.28	6.8e-05	CHD1		CHD1	1.28	chromodomain helicase DNA binding protein 1	Nucleus	enzyme
	TC160887	BT057617	Salmo salar clone ssal-rgb-543-355 Splicing factor arginine/serine-rich 7 putative mRNA complete cds	1.278	0.001862	SRSF7		SRSF7	1.278	serine and arginine rich splicing factor 7	Nucleus	other
	TC167050	NM_205634	Danio rerio zgc:77391 (zgc:77391) mRNA_x0001_gb-BC065355.1- Danio rerio zgc:77391 mRNA (cDNA clone MGC:77391 IMAGE:6969490) complete cds	1.277	0.005894	WBP1		WBP1	1.277	WW domain binding protein 1	Cytoplasm	other
	TC147265	NM_001171853	Oncorhynchus mykiss cytokine inducible SH2-containing protein (cish) mRNA_x0001_emb-AM903340.1- Oncorhynchus mykiss mRNA for cytokine-inducible SH2-containing protein (cish gene)	1.276	0.000522	SOCS2		SOCS2	1.276	suppressor of cytokine signaling 2	Cytoplasm	other
	TC169118	NM_001141723	Salmo salar transglutaminase 2 C polypeptide (tgm2) mRNA_x0001_gb-BT044878.1- Salmo salar clone ssal-rgf-506-116 Protein-glutamine gamma-glutamyltransferase 2 putative mRNA complete cds	1.275	0.000171	TGM2		TGM2	1.275	transglutaminase 2	Cytoplasm	enzyme
	TC158195	NM_001173751	Salmo salar Cytohesin-2 (cyh2) mRNA_x0001_gb-BT059417.1- Salmo salar clone ssal-rgf-541-375 Cytohesin-2 putative mRNA complete cds	1.274	0.000518	CYTH4		CYTH4	1.274	cytohesin 4	Cytoplasm	other
	TC141606	tpg-BK001518.1-	TPA_inf: Takifugu rubripes FAM20C2 mRNA complete cds	1.274	0.002181	FAM20C		FAM20C	1.274	FAM20C golgi associated secretory pathway kinase	Extracellular Space	enzyme
	TC150130	M25754	Chinook salmon melanin-concentrating hormone 1 (MCH 1) mRNA complete cds	1.272	0.012662	PMCH		PMCH	1.272	pro-melanin concentrating hormone	Extracellular Space	other
	TC143710	BT073257	Oncorhynchus mykiss clone omyk-evn-506-134 Ubiquitin-conjugating enzyme E2 variant 1 putative mRNA complete cds	1.272	3.6e-05	TMEM189		TMEM189	1.272	transmembrane protein 189	Cytoplasm	enzyme
	TC166473	not-annotated	not-annotated	1.268	3.9e-05	ITGA6		ITGA6	1.268	integrin subunit alpha 6	Plasma Membrane	cell surface receptor
	TC138042	NM_001141384	Salmo salar NADH dehydrogenase 1 alpha subcomplex subunit 4-like 2 (nua4l) mRNA_x0001_gb-BT049369.1- Salmo salar clone ssal-rgb2-616-091 NADH dehydrogenase 1 alpha subcomplex subunit 4-like 2 putative mRNA complete cds	1.26	0.026628	NDUFA4L2		NDUFA4L2	1.26	NDUFA4 mitochondrial complex associated like 2	Other	enzyme
	TC139639	CR712755	Tetraodon nigroviridis full-length cDNA	1.259	0.049825	OSBPL10		OSBPL10	1.259	oxysterol binding protein like 10	Cytoplasm	transporter
	TC148852	BT071855	Salmo salar clone ssal-rgf-002-197 DNA mismatch repair protein Mlh3 putative mRNA pseudogene cds	1.256	0.010755	MLH3		MLH3	1.256	mutL homolog 3	Nucleus	other
	TC143908	NM_001140014	Salmo salar FK506-binding protein 1A (fkb1a) mRNA_x0001_gb-BT045069.1- Salmo salar clone ssal-rgf-511-075 FK506-binding protein 1A putative mRNA complete cds	1.255	0.01632	FKBP1A		FKBP1A	1.255	FKBP prolyl isomerase 1A	Cytoplasm	enzyme
	TC155351	BT060207	Salmo salar clone ssal-rgh-509-031 Claudin-like protein ZF4A22 putative mRNA complete cds	1.254	0.001824	CLDN7		CLDN7	1.254	claudin 7	Plasma Membrane	other
	TC158061	BT057516	Salmo salar clone ssal-evd-514-241 Differentially expressed in FDCP 6 putative mRNA complete cds	1.252	7.2e-05	DEF6		DEF6	1.252	DEF6 guanine nucleotide exchange factor	Extracellular Space	other
	TC133321	BT079844	Esox lucius clone eluc-evq-508-189 Proteasome assembly chaperone 2 putative mRNA complete cds	1.25	0.01059	PSMG2		PSMG2	1.25	proteasome assembly chaperone 2	Nucleus	other
	TC150434	not-annotated	not-annotated	1.249	0.000141	CCDC64		BICDL1	1.249	BICD family like cargo adaptor 1	Cytoplasm	other
	TC160412	FQ310506	Dicentrarchus labrax chromosome sequence corresponding to linkage group 1 top part complete sequence	1.246	0.007093	GCNT7		GCNT7	1.246	glucosaminyl (N-acetyl) transferase family member 7	Other	other
	TC146126	BT045163	Salmo salar clone ssal-rgf-513-355 PQ-loop repeat-containing protein 2 putative mRNA complete cds	1.242	9.8e-05	PQLC2		SLC66A1	1.242	solute carrier family 66 member 1	Cytoplasm	transporter
	TC151350	BX957294	Zebrafish DNA sequence from clone DKEY-187I15 in linkage group 6 complete sequence	1.238	0.003371	VPS37B		VPS37B	1.238	VPS37B subunit of ESCRT-I	Cytoplasm	other
	TC153409	BT048694	Salmo salar clone ssal-eve-522-219 Digestive organ expansion factor putative mRNA complete cds	1.237	0.000125	DIEXF		UTP25	1.237	UTP25 small subunit processor component	Nucleus	other
	TC156166	CR640056	Tetraodon nigroviridis full-length cDNA	1.235	3.8e-05	RASL11B		RASL11B	1.235	RAS like family 11 member B	Plasma Membrane	enzyme
	TC145726	HM190267	Oncorhynchus mykiss transmembrane protein 120B mRNA partial cds	1.235	2.3e-05	TMEM120B		TMEM120B	1.235	transmembrane protein 120B	Nucleus	other
	TC156365	BT072062	Salmo salar clone ssal-rgf-509-333 transport protein Sec61 subunit alpha isoform B putative mRNA pseudogene cds	1.234	0.000823	SEC61A1		SEC61A1	1.234	SEC61 translocon subunit alpha 1	Cytoplasm	transporter
	TC140865	NM_001093303	Xenopus laevis Tax1 (human T-cell leukemia virus type I) binding protein 3 (tax1bp3) mRNA_x0001_gb-BC077422.1- Xenopus laevis Tax1 (human T-cell leukemia virus type I) binding protein 3 mRNA (cDNA clone MGC:82188 IMAGE:3400425) complete cds	1.234	7.1e-05	TAX1BP3		TAX1BP3	1.234	Tax1 binding protein 3	Cytoplasm	transcription regulator
	TC142275	NM_001045059	Danio rerio si:ch211-153j24.4 (si:ch211-153j24.4) mRNA	1.233	0.021618	BATF		BATF	1.233	basic leucine zipper ATF-like transcription factor	Nucleus	transcription regulator
	TC166586	BC141791	Danio rerio zgc:152968 mRNA (cDNA clone MGC:162729 IMAGE:2602202) complete cds	1.232	0.048687	REXO1		REXO1	1.232	RNA exonuclease 1 homolog	Nucleus	transcription regulator
	TC159618	NM_001165379	Salmo salar Influenza virus NS1A-binding protein homolog A (ns1ba) mRNA_x0001_gb-BT058894.1- Salmo salar clone ssal-rgf-511-317 Influenza virus NS1A-binding protein homolog A putative mRNA complete cds	1.23	0.000809	IVNS1ABP		IVNS1ABP	1.23	influenza virus NS1A binding protein	Nucleus	other
	TC138682	NM_001173969	Salmo salar TraB domain containing (trabd) mRNA_x0001_gb-BT060390.1- Salmo salar clone ssal-rgh-518-130 TraB domain-containing protein putative mRNA complete cds	1.228	0.006789	TRABD		TRABD	1.228	TraB domain containing	Extracellular Space	other
	TC167547	BT043977	Salmo salar clone HM5_1926 Kruppel-like factor 11 mRNA partial cds	1.227	0.006134	KLF11		KLF11	1.227	Kruppel like factor 11	Nucleus	transcription regulator
	TC145993	not-annotated	not-annotated	1.226	0.006325	ATXN2		ATXN2	1.226	ataxin 2	Nucleus	other
	TC152349	NM_001079192	Xenopus (Silurana) tropicalis dishevelled dsh homolog 2 (dvl2) mRNA_x0001_gb-BC123948.1- Xenopus tropicalis dishevelled dsh homolog 2 mRNA (cDNA clone MGC:146359 IMAGE:7693791) complete cds	1.224	0.000762	DVL2		DVL2	1.224	dishevelled segment polarity protein 2	Cytoplasm	other
	TC144260	AB370192	Thunnus orientalis LPL mRNA for lipoprotein lipase complete cds	1.224	0.000934	LPL		LPL	1.224	lipoprotein lipase	Cytoplasm	enzyme
	TC146379	NM_001141412	Salmo salar Ras-related protein Rab-37 (rab37) mRNA_x0001_gb-BT049497.2- Salmo salar clone ssal-evf-563-336 Ras-related protein Rab-37 putative mRNA complete cds	1.222	0.000103	EFCAB4B		CRACR2A	1.222	calcium release activated channel regulator 2A	Cytoplasm	other
	TC160243	BT059236	Salmo salar clone ssal-rgf-535-248 14-3-3 protein beta/alpha putative mRNA complete cds	1.222	2.2e-05	YWHAB		YWHAB	1.222	tyrosine 3-monooxygenase/tryptophan 5-monooxygenase activation protein beta	Cytoplasm	other
	TC160325	GU129140	Salmo salar IgH locus B genomic sequence	1.22	0.000126	CDO1		CDO1	1.22	cysteine dioxygenase type 1	Cytoplasm	enzyme
	TC145147	BT072131	Salmo salar clone ssal-rgf-512-378 CDV3 homolog putative mRNA partial cds	1.22	6.9e-05	CDV3		CDV3	1.22	CDV3 homolog	Cytoplasm	other
	TC151882	X17327	Oncorhynchus keta mRNA for vasotocin-1 and neurophysin	1.218	0.011791	AVP		AVP	1.218	arginine vasopressin	Plasma Membrane	other
	TC172052	EF467296	Salmo salar clone 31E09 TCR-alpha/delta locus genomic sequence	1.216	0.001582	LAMC1		LAMC1	1.216	laminin subunit gamma 1	Extracellular Space	other
	TC159415	EU025684	Salmo salar homeobox protein HoxA7aa (HoxA7aa) gene complete cds	1.214	0.014003	HOXA7		HOXA7	1.214	homeobox A7	Nucleus	transcription regulator
	TC134850	BT044977	Salmo salar clone ssal-rgf-508-334 Leukocyte elastase inhibitor putative mRNA complete cds	1.213	2.6e-05	SERPINB6		SERPINB6	1.213	serpin family B member 6	Cytoplasm	other
	TC161447	NM_001165245	Oncorhynchus mykiss Apoptosis-inducing factor-like mitochondrion-associated inducer of death (amid) nuclear gene encoding mitochondrial protein mRNA_x0001_gb-BT074103.1- Oncorhynchus mykiss clone omyk-evo-513-349 Apoptosis-inducing factor-like mitochondrion-associated inducer of death putative mRNA complete cds	1.212	2.2e-05	AIFM2		AIFM2	1.212	apoptosis inducing factor mitochondria associated 2	Cytoplasm	enzyme
	TC150667	BT060233	Salmo salar clone ssal-rgh-510-150 Endonuclease domain-containing 1 protein precursor putative mRNA complete cds	1.212	0.000543	ENDOD1		ENDOD1	1.212	endonuclease domain containing 1	Extracellular Space	enzyme
	TC156463	BT072545	Salmo salar clone ssal-rgf-529-339 Mixed lineage kinase domain-like protein putative mRNA pseudogene cds	1.212	0.002728	MLKL		MLKL	1.212	mixed lineage kinase domain like pseudokinase	Cytoplasm	kinase
	TC147645	NM_200449	Danio rerio alanine-glyoxylate aminotransferase 2-like 1 (agxt2l1) mRNA_x0001_gb-BC055122.1- Danio rerio zgc:63486 mRNA (cDNA clone MGC:63486 IMAGE:2602373) complete cds	1.211	0.018479	AGXT2L1		ETNPPL	1.211	ethanolamine-phosphate phospho-lyase	Cytoplasm	enzyme
	TC133229	NM_001173914	Salmo salar 35 kDa SR repressor protein (srr35) mRNA_x0001_gb-BT059492.1- Salmo salar clone ssal-rgf-516-225 35 kDa SR repressor protein putative mRNA complete cds	1.21	0.020582	Srsf10		-	1.21	-	-	-
	IMM 992	AY263797	Oncorhynchus mykiss CD83 (Onmy-CD83) mRNA Onmy-CD83*HC.2 allele complete cds	1.209	0.000383	CD83		CD83	1.209	CD83 molecule	Plasma Membrane	cell surface receptor
	TC150571	NM_001141216	Salmo salar THAP domain-containing protein 1 (thap1) mRNA_x0001_gb-BT048687.2- Salmo salar clone ssal-eve-548-164 THAP domain-containing protein 1 putative mRNA complete cds	1.209	0.000191	THAP1		THAP1	1.209	THAP domain containing 1	Nucleus	transcription regulator
	TC164977	XM_002721808	PREDICTED: Oryctolagus cuniculus tubulin beta 1-like (LOC100347858) mRNA	1.208	0.000382	TUBB4B		TUBB4B	1.208	tubulin beta 4B class IVb	Cytoplasm	other
	TC162822	BT074865	Osmerus mordax clone omor-eva-517-176 Ras-related protein Rab-7 putative mRNA complete cds	1.206	0.025972	RAB7A		RAB7A	1.206	RAB7A, member RAS oncogene family	Cytoplasm	enzyme
	TC135344	NM_001173758	Salmo salar Glycerol kinase testis specific 1 (glpk3) mRNA_x0001_gb-BT059430.1- Salmo salar clone ssal-rgf-535-285 Glycerol kinase testis specific 1 putative mRNA complete cds	1.205	0.013831	GK		GK	1.205	glycerol kinase	Cytoplasm	kinase
	TC137650	BT125454	Salmo salar clone ssal-evd-559-368 Telethonin putative mRNA complete cds	1.205	0.040631	TCAP		TCAP	1.205	titin-cap	Cytoplasm	other
	TC154517	EU025716	Salmo salar retinoic acid receptor gamma b (Rargb) gene partial cds; and homeobox protein HoxC13ba (HoxC13ba) homeobox protein HoxC12ba (HoxC12ba) homeobox protein HoxC11ba (HoxC11ba) homeobox protein HoxC10ba (HoxC10ba) homeobox protein HoxC9ba (HoxC9ba) homeobox protein HoxC8ba (HoxC8ba) homeobox protein HoxC6ba (HoxC6ba) homeobox protein HoxC5ba (HoxC5ba) and homeobox protein HoxC4ba (HoxC4ba)…	1.202	0.047604	BBOX1		BBOX1	1.202	gamma-butyrobetaine hydroxylase 1	Cytoplasm	enzyme
	TC164710	NM_199946	Danio rerio male germ cell-associated kinase (mak) mRNA_x0001_gb-BC052126.1- Danio rerio male germ cell-associated kinase mRNA (cDNA clone MGC:56603 IMAGE:5915345) complete cds	1.199	0.038814	MAK		MAK	1.199	male germ cell associated kinase	Cytoplasm	kinase
	TC139228	CR407595	Zebrafish DNA sequence from clone CH211-220P15 in linkage group 4 Contains the gene for a novel protein similar to H.sapiens CCDC3 coiled-coil domain containing 3 (CCDC3) the gene for a novel protein similar to H.sapiens OPTN optineurin (OPTN zgc:77868) and five novel genes complete sequence	1.196	0.006149	CCDC3		CCDC3	1.196	coiled-coil domain containing 3	Cytoplasm	other
	TC162315	BT071998	Salmo salar clone ssal-rgf-507-013 unknown large open reading frame mRNA novel cds	1.196	0.000158	HNRNPU		HNRNPU	1.196	heterogeneous nuclear ribonucleoprotein U	Nucleus	transporter
	TC164617	NM_001140492	Salmo salar tubulin folding cofactor B (tbcb) mRNA_x0001_gb-BT045966.1- Salmo salar clone ssal-rgf-537-346 Tubulin folding cofactor B putative mRNA complete cds	1.196	0.001119	TBCB		TBCB	1.196	tubulin folding cofactor B	Cytoplasm	other
	TC145067	DQ246664	Oncorhynchus mykiss SYPG1 (SYPG1) PHF1 (PHF1) and RGL2 (RGL2) genes complete cds; DNaseII pseudogene complete sequence; LGN-like PBX2 (PBX2) NOTCH-like TAP1 (TAP1) and BRD2 (BRD2) genes complete cds; and MHCII-alpha and Raftlin-like pseudogenes complete sequence	1.194	0.007915	SOS1		SOS1	1.194	SOS Ras/Rac guanine nucleotide exchange factor 1	Cytoplasm	other
	TC141064	BT045847	Salmo salar clone ssal-rgf-534-222 EGF-like domain-containing protein 7 precursor putative mRNA complete cds	1.193	2.5e-05	EGFL7		EGFL7	1.193	EGF like domain multiple 7	Extracellular Space	other
	TC146275	BT059080	Salmo salar clone ssal-rgf-524-099 S-adenosylmethionine synthetase isoform type-2 putative mRNA complete cds	1.193	3.5e-05	MAT2A		MAT2A	1.193	methionine adenosyltransferase 2A	Cytoplasm	enzyme
	TC166670	FN824519	Oncorhynchus mykiss mRNA for IL-4 receptor-2 precursor (il4R2 gene)	1.192	0.000253	CSF2RB		CSF2RB	1.192	colony stimulating factor 2 receptor subunit beta	Plasma Membrane	cell surface receptor
	TC152476	BT057876	Salmo salar clone ssal-eve-576-297 Cofilin-2 putative mRNA complete cds	1.191	0.047679	CFL2		CFL2	1.191	cofilin 2	Extracellular Space	other
	TC158135	NM_001123534	Salmo salar cystic fibrosis transmembrane conductance regulator II (LOC100136366) mRNA_x0001_gb-AF161070.1-AF161070 Salmo salar cystic fibrosis transmembrane conductance regulator II mRNA complete cds	1.188	6.6e-05	CFTR		CFTR	1.188	CF transmembrane conductance regulator	Plasma Membrane	ion channel
	TC137939	XM_684682	PREDICTED: Danio rerio PDZ domain containing 8 (pdzd8) mRNA	1.187	0.000789	PDZD8		PDZD8	1.187	PDZ domain containing 8	Extracellular Space	other
	TC164809	XM_003131317	PREDICTED: Sus scrofa proto-oncogene Wnt-3-like (LOC100519512) mRNA	1.184	0.035218	WNT11		WNT11	1.184	Wnt family member 11	Extracellular Space	other
	TC134861	XM_002709711	PREDICTED: Oryctolagus cuniculus spectrin beta 2-like (LOC100338720) mRNA	1.181	0.00495	SPTBN1		SPTBN1	1.181	spectrin beta, non-erythrocytic 1	Plasma Membrane	other
	TC148308	BC164510	Danio rerio core 1 synthase glycoprotein-N-acetylgalactosamine 3-beta-galactosyltransferase 1a mRNA (cDNA clone MGC:191685 IMAGE:100059994) complete cds	1.18	0.010089	C1GALT1		C1GALT1	1.18	core 1 synthase, glycoprotein-N-acetylgalactosamine 3-beta-galactosyltransferase 1	Plasma Membrane	enzyme
	TC145101	BT072734	Salmo salar clone ssal-rgf-538-200 ATP-binding cassette sub-family F member 3 putative mRNA pseudogene cds	1.179	0.002443	ABCF3		ABCF3	1.179	ATP binding cassette subfamily F member 3	Other	transporter
	TC159353	EU025708	Salmo salar EAP30 subunit of ELL complex a (Eap30a) nuclear domain 10 protein 52 a (Ndp52a) tubulin tyrosine ligase-like family member 6a (BAC05032) homeobox protein HoxB8ba (HoxB8ba) homeobox protein HoxB6ba (HoxB6ba) homeobox protein HoxB5ba (HoxB5ba) homeobox protein HoxB3ba (HoxB3ba) homeobox protein HoxB1ba (HoxB1ba) Src family associated phosphoprotein 1 (Scap1) sorting nexin 11 (Snx11) chr…	1.177	0.000625	NFE2L1		NFE2L1	1.177	nuclear factor, erythroid 2 like 1	Nucleus	transcription regulator
	TC162145	XM_001333471	PREDICTED: Danio rerio growth arrest-specific protein 7-like (LOC793701) mRNA	1.175	0.002251	GAS7		GAS7	1.175	growth arrest specific 7	Cytoplasm	transcription regulator
	TC143251	BT045396	Salmo salar clone ssal-rgf-520-076 Abhydrolase domain-containing protein 10 mitochondrial precursor putative mRNA complete cds	1.173	0.000553	ABHD10		ABHD10	1.173	abhydrolase domain containing 10, depalmitoylase	Cytoplasm	enzyme
	TC172082	EU325865	Oncorhynchus masou formosanus ribosomal protein L13A (RPL13A) mRNA complete cds	1.172	0.025466	SMO		SMO	1.172	smoothened, frizzled class receptor	Plasma Membrane	G-protein coupled receptor
	TC142866	CU929225	Zebrafish DNA sequence from clone CH73-140L11 in linkage group 10 complete sequence	1.171	0.000918	TRIM62		TRIM62	1.171	tripartite motif containing 62	Cytoplasm	enzyme
	TC146575	BT048586	Salmo salar clone ssal-rgb2-582-033 C3orf54 putative mRNA complete cds	1.17	9.1e-05	FAM212A		INKA1	1.17	inka box actin regulator 1	Cytoplasm	other
	TC168529	BT058923	Salmo salar clone ssal-rgf-513-297 CTP synthase 1 putative mRNA complete cds	1.168	0.000157	CTPS1		CTPS1	1.168	CTP synthase 1	Nucleus	enzyme
	TC144308	BT071875	Salmo salar clone ssal-rgf-501-202 tyrosine kinase 2 beta putative mRNA pseudogene cds	1.166	7.7e-05	PTK2B		PTK2B	1.166	protein tyrosine kinase 2 beta	Cytoplasm	kinase
	TC163580	XM_001500096	PREDICTED: Equus caballus similar to Forkhead box protein I1 (Forkhead-related protein FKHL10) (Forkhead-related transcription factor 6) (FREAC-6) (Hepatocyte nuclear factor 3 forkhead homolog 3) (HNF-3/fork-head homolog 3) (HFH-3) (LOC100070435) mRNA	1.165	0.018776	FOXI1		FOXI1	1.165	forkhead box I1	Nucleus	transcription regulator
	TC168185	BT074987	Osmerus mordax clone omor-eva-002-078 Mammalian ependymin-related protein 1 precursor putative mRNA complete cds	1.16	0.049451	EPDR1		EPDR1	1.16	ependymin related 1	Nucleus	other
	TC139858	NM_001160600	Oncorhynchus mykiss poly (ADP-ribose) polymerase family member 3 (parp3) mRNA_x0001_gb-BT073330.1- Oncorhynchus mykiss clone omyk-evn-510-153 Poly synthetase 3 putative mRNA complete cds	1.16	6.3e-05	KANSL2		KANSL2	1.16	KAT8 regulatory NSL complex subunit 2	Nucleus	other
	TC166283	BT056428	Salmo salar clone ssal-evf-542-346 Histone H3.3 putative mRNA complete cds	1.156	0.025295	PRKD2		PRKD2	1.156	protein kinase D2	Cytoplasm	kinase
	TC134881	BT049710	Salmo salar clone ssal-rgb2-576-126 GTPase IMAP family member 4 putative mRNA complete cds	1.155	0.009025	GIMAP6		GIMAP6	1.155	GTPase, IMAP family member 6	Cytoplasm	other
	TC155445	BT045040	Salmo salar clone ssal-rgf-510-164 Annexin A13 putative mRNA complete cds	1.153	0.037419	ANXA13		ANXA13	1.153	annexin A13	Plasma Membrane	other
	TC168228	NM_001140479	Salmo salar snail homolog Sna (snai) mRNA_x0001_gb-BT045941.1- Salmo salar clone ssal-rgf-537-098 snail homolog Sna putative mRNA complete cds	1.152	5.7e-05	SNAI1		SNAI1	1.152	snail family transcriptional repressor 1	Nucleus	transcription regulator
	TC162056	BT074392	Oncorhynchus mykiss clone omyk-evo-504-302 ATP synthase lipid-binding protein mitochondrial precursor putative mRNA complete cds	1.15	0.000666	ATP5G3		ATP5MC3	1.15	ATP synthase membrane subunit c locus 3	Cytoplasm	transporter
	TC155993	NM_001141351	Salmo salar Programmed cell death 1 ligand 1 (pdl1) mRNA_x0001_gb-BT049246.1- Salmo salar clone ssal-sjb-011-129 Programmed cell death 1 ligand 1 precursor putative mRNA complete cds	1.148	0.000118	CD274		CD274	1.148	CD274 molecule	Plasma Membrane	enzyme
	TC157957	not-annotated	not-annotated	1.148	0.022447	HMGCS1		HMGCS1	1.148	3-hydroxy-3-methylglutaryl-CoA synthase 1	Cytoplasm	enzyme
	TC153578	EU025705	Salmo salar homeobox protein HoxB13aa (HoxB13aa) gene complete cds	1.148	0.000144	HOXB13		HOXB13	1.148	homeobox B13	Nucleus	transcription regulator
	TC154689	GU817335	Salmo salar clone BAC CHORI214-083H23 complete sequence	1.145	0.000138	MOG		MOG	1.145	myelin oligodendrocyte glycoprotein	Extracellular Space	other
	TC151353	NM_001140347	Salmo salar RuvB-like 1 (ruvb1) mRNA_x0001_gb-BT045691.1- Salmo salar clone ssal-rgf-528-355 RuvB-like 1 putative mRNA complete cds	1.142	0.000363	RUVBL1		RUVBL1	1.142	RuvB like AAA ATPase 1	Nucleus	transcription regulator
	TC155547	not-annotated	not-annotated	1.138	0.022067	SRF		SRF	1.138	serum response factor	Nucleus	transcription regulator
	TC147726	BT046273	Salmo salar clone ssal-evf-520-147 Nascent polypeptide-associated complex subunit alpha putative mRNA complete cds	1.136	0.000941	NACA		NACA	1.136	nascent polypeptide associated complex subunit alpha	Cytoplasm	transcription regulator
	TC159070	BT046988	Salmo salar clone ssal-eve-563-192 Copper transport protein ATOX1 putative mRNA complete cds	1.133	0.046049	ATOX1		ATOX1	1.133	antioxidant 1 copper chaperone	Cytoplasm	transporter
	TC163626	AY736067	Salmo salar delta-6 fatty acyl desaturase D6fad_a gene complete cds	1.133	7.8e-05	FADS2		FADS2	1.133	fatty acid desaturase 2	Plasma Membrane	enzyme
	TC135491	not-annotated	not-annotated	1.129	0.014119	CLDN1		CLDN1	1.129	claudin 1	Plasma Membrane	other
	TC151794	BT059158	Salmo salar clone ssal-rgf-528-352 Tropomyosin alpha-3 chain putative mRNA complete cds	1.129	0.000226	TPM3		TPM3	1.129	tropomyosin 3	Cytoplasm	other
	TC150709	BT072349	Salmo salar clone ssal-rgf-522-121 Arylacetamide deacetylase-like 1 putative mRNA pseudogene cds	1.128	0.001814	NCEH1		NCEH1	1.128	neutral cholesterol ester hydrolase 1	Plasma Membrane	enzyme
	TC164471	BT072120	Salmo salar clone ssal-rgf-512-187 Tubulin alpha-1C chain putative mRNA partial cds	1.128	0.000152	TUBA1C		TUBA1C	1.128	tubulin alpha 1c	Cytoplasm	other
	TC136674	U49694	Rattus norvegicus brain cytosolic acyl coenzyme A thioester hydrolase mRNA complete cds	1.127	3.7e-05	ACOT7		ACOT7	1.127	acyl-CoA thioesterase 7	Cytoplasm	enzyme
	TC148842	NM_001146437	Salmo salar cornichon homolog (Drosophila) (cnih) mRNA_x0001_gb-BT056744.1- Salmo salar clone ssal-eve-502-265 cornichon homolog putative mRNA complete cds	1.126	0.028829	CNIH		CNIH1	1.126	cornichon family AMPA receptor auxiliary protein 1	Plasma Membrane	other
	TC171529	NM_001173902	Salmo salar RING finger protein 146 (rn146) mRNA_x0001_gb-BT059789.1- Salmo salar clone ssal-rgf-521-123 RING finger protein 146 putative mRNA complete cds	1.126	0.023166	RNF146		RNF146	1.126	ring finger protein 146	Cytoplasm	enzyme
	TC167315	XM_002666455	PREDICTED: Danio rerio hm:zehs0001 (hm:zehs0001) mRNA	1.125	0.048942	LAMB2		LAMB2	1.125	laminin subunit beta 2	Extracellular Space	enzyme
	TC140988	BT071843	Salmo salar clone ssal-rgf-001-304 Heterogeneous nuclear ribonucleoprotein L putative mRNA pseudogene cds	1.124	0.026473	HNRNPL		HNRNPL	1.124	heterogeneous nuclear ribonucleoprotein L	Nucleus	other
	TC152298	CR381538	Zebrafish DNA sequence from clone CH211-87B12 in linkage group 1 complete sequence	1.122	0.001583	FBXW7		FBXW7	1.122	F-box and WD repeat domain containing 7	Nucleus	enzyme
	TC136446	CR715416	Tetraodon nigroviridis full-length cDNA	1.121	0.027084	FAM117B		FAM117B	1.121	family with sequence similarity 117 member B	Other	other
	TC163493	NM_001139606	Salmo salar slow troponin T family-like (LOC100194520) mRNA_x0001_gb-BT043529.1- Salmo salar clone HM4_1567 slow troponin T family-like mRNA complete cds	1.121	0.001599	TNNT2		TNNT2	1.121	troponin T2, cardiac type	Cytoplasm	other
	TC138709	AB516401	Plecoglossus altivelis altivelis TRAF6 gene for TNF receptor-associated factor 6 complete cds	1.121	0.003051	TRAF6		TRAF6	1.121	TNF receptor associated factor 6	Cytoplasm	enzyme
	TC137187	NM_001124407	Oncorhynchus mykiss complement component C7-2 (c7-2) mRNA_x0001_emb-AJ622902.2- Oncorhynchus mykiss mRNA for complement component C7-2 (c7-2 gene)	1.12	0.00667	C7		C7	1.12	complement C7	Extracellular Space	other
	TC150387	NM_200260	Danio rerio protein phosphatase 4 regulatory subunit 1 (ppp4r1) mRNA_x0001_gb-BC048878.1- Danio rerio protein phosphatase 4 regulatory subunit 1 mRNA (cDNA clone MGC:55603 IMAGE:2643612) complete cds	1.119	0.000492	PPP4R1		PPP4R1	1.119	protein phosphatase 4 regulatory subunit 1	Other	phosphatase
	TC169397	NM_199219	Danio rerio E74-like factor 2b (ets domain transcription factor) (elf2b) mRNA_x0001_gb-BC056554.1- Danio rerio E74-like factor 2 (ets domain transcription factor) mRNA (cDNA clone MGC:65764 IMAGE:6795332) complete cds	1.118	0.003975	ELF2		ELF2	1.118	E74 like ETS transcription factor 2	Nucleus	transcription regulator
	TC140660	BC164165	Danio rerio growth hormone regulated TBC protein 1b mRNA (cDNA clone MGC:191340 IMAGE:100059649) complete cds	1.118	0.000387	GRTP1		GRTP1	1.118	growth hormone regulated TBC protein 1	Other	other
	TC163807	BT072561	Salmo salar clone ssal-rgf-530-188 Condensin complex subunit 3 putative mRNA partial cds	1.118	0.020997	NCAPG		NCAPG	1.118	non-SMC condensin I complex subunit G	Nucleus	other
	TC136929	not-annotated	not-annotated	1.118	0.000124	RRP12		RRP12	1.118	ribosomal RNA processing 12 homolog	Nucleus	other
	TC145105	BT056463	Salmo salar clone ssal-eve-551-110 Stromal membrane-associated protein 1 putative mRNA complete cds	1.118	0.032096	SMAP1		SMAP1	1.118	small ArfGAP 1	Cytoplasm	other
	TC143564	NM_001139799	Salmo salar NOP2/Sun domain family member 5 (nsun5) mRNA_x0001_gb-BT044678.1- Salmo salar clone ssal-rgf-002-265 methyltransferase NSUN5 putative mRNA complete cds	1.116	0.000435	NSUN5		NSUN5	1.116	NOP2/Sun RNA methyltransferase 5	Nucleus	enzyme
	TC170607	CR691698	Tetraodon nigroviridis full-length cDNA	1.116	0.004102	STUB1		STUB1	1.116	STIP1 homology and U-box containing protein 1	Cytoplasm	enzyme
	TC149099	XM_694448	PREDICTED: Danio rerio actin-binding Rho-activating protein-like (LOC570917) mRNA	1.115	0.020495	ABRA		ABRA	1.115	actin binding Rho activating protein	Cytoplasm	other
	TC134069	NM_001123630	Salmo salar solute carrier family 6 (neurotransmitter transporter taurine) member 6 (slc6a6) mRNA_x0001_gb-AF428143.1- Salmo salar taurine transporter mRNA complete cds	1.115	0.017506	SLC6A6		SLC6A6	1.115	solute carrier family 6 member 6	Plasma Membrane	transporter
	TC163762	NM_001200233	Ictalurus punctatus UDP-glucuronosyltransferase (ugt) mRNA_x0001_gb-DQ866146.1- Ictalurus punctatus UDP-glucuronosyltransferase (UGT) mRNA complete cds	1.114	0.028328	UGT1A6		UGT1A6	1.114	UDP glucuronosyltransferase family 1 member A6	Cytoplasm	enzyme
	TC138229	FP074878	Zebrafish DNA sequence from clone DKEY-283K6 in linkage group 10 complete sequence	1.113	0.001097	ZMIZ2		ZMIZ2	1.113	zinc finger MIZ-type containing 2	Nucleus	transcription regulator
	TC146936	AY325185	Rattus norvegicus Ab2-064 mRNA complete cds	1.112	0.03758	ZSWIM6		ZSWIM6	1.112	zinc finger SWIM-type containing 6	Extracellular Space	other
	TC135046	XM_001919934	PREDICTED: Danio rerio microtubule-associated tumor suppressor 1 homolog A-like (LOC557250) mRNA	1.11	0.004151	MTUS1		MTUS1	1.11	microtubule associated scaffold protein 1	Extracellular Space	other
	TC149815	AB546833	Oryzias latipes sec24c mRNA for protein transport protein Sec24c partial cds	1.109	0.03384	SEC24C		SEC24C	1.109	SEC24 homolog C, COPII coat complex component	Cytoplasm	transporter
	TC148585	NM_001140167	Salmo salar Interferon-stimulated 20 kDa exonuclease-like 1 (i20l1) mRNA_x0001_gb-BT045359.1- Salmo salar clone ssal-rgf-519-081 Interferon-stimulated 20 kDa exonuclease-like 1 putative mRNA complete cds	1.108	0.000922	AEN		AEN	1.108	apoptosis enhancing nuclease	Nucleus	enzyme
	TC153826	NM_001195172	Oncorhynchus mykiss suppressor of cytokine signaling 7 (socs7) mRNA_x0001_emb-AM903343.1- Oncorhynchus mykiss mRNA for suppressor of cytokine signaling 7 (socs7 gene)	1.108	0.026606	SOCS7		SOCS7	1.108	suppressor of cytokine signaling 7	Cytoplasm	other
	TC159192	NM_001141419	Salmo salar Sperm acrosome membrane-associated protein 4 (saca4) mRNA_x0001_gb-BT049535.2- Salmo salar clone ssal-evf-554-253 Sperm acrosome membrane-associated protein 4 precursor putative mRNA complete cds	1.108	0.001068	SPACA4		SPACA4	1.108	sperm acrosome associated 4	Other	other
	TC145113	BT074061	Oncorhynchus mykiss clone omyk-evo-512-383 Leukocyte cysteine proteinase inhibitor 1 putative mRNA complete cds	1.107	0.000316	CSTB		CSTB	1.107	cystatin B	Cytoplasm	peptidase
	TC161835	BT043605	Salmo salar clone HM4_3283 stress-induced-phosphoprotein 1 (Hsp70/Hsp90-organizing) (stip1) mRNA complete cds	1.106	0.014585	STIP1		STIP1	1.106	stress induced phosphoprotein 1	Cytoplasm	other
	TC145012	NM_001173941	Salmo salar WEE1 homolog (S. pombe) (wee1) mRNA_x0001_gb-BT059320.1- Salmo salar clone ssal-rgf-541-087 Wee1-like protein kinase putative mRNA complete cds	1.104	0.000524	WEE1		WEE1	1.104	WEE1 G2 checkpoint kinase	Nucleus	kinase
	TC163641	BT072636	Salmo salar clone ssal-rgf-534-103 Eukaryotic translation initiation factor 4 gamma 1 putative mRNA partial cds	1.103	0.000423	EIF4G1		EIF4G1	1.103	eukaryotic translation initiation factor 4 gamma 1	Cytoplasm	translation regulator
	TC134455	NM_001140222	Salmo salar PDZ and LIM domain protein 1 (pdli1) mRNA_x0001_gb-BT045450.1- Salmo salar clone ssal-rgf-521-343 PDZ and LIM domain protein 1 putative mRNA complete cds	1.103	8.4e-05	PDLIM1		PDLIM1	1.103	PDZ and LIM domain 1	Cytoplasm	transcription regulator
	TC148693	not-annotated	not-annotated	1.099	0.000384	HSPA4L		HSPA4L	1.099	heat shock protein family A (Hsp70) member 4 like	Cytoplasm	other
	TC167144	CR718976	Tetraodon nigroviridis full-length cDNA	1.099	0.000532	PAPD5		TENT4B	1.099	terminal nucleotidyltransferase 4B	Nucleus	enzyme
	TC171340	AY872256	Oncorhynchus mykiss IgH.A locus partial sequence	1.099	0.014199	PGBD4		PGBD4	1.099	piggyBac transposable element derived 4	Other	other
	TC161799	XM_001084225	PREDICTED: Macaca mulatta dipeptidyl peptidase 9-like (LOC695587) partial mRNA	1.097	0.002904	DPP9		DPP9	1.097	dipeptidyl peptidase 9	Cytoplasm	peptidase
	TC149301	NM_001146654	Salmo salar Mediator of RNA polymerase II transcription subunit 19-B (md19b) mRNA_x0001_gb-BT056901.1- Salmo salar clone ssal-eve-528-126 Mediator of RNA polymerase II transcription subunit 19-B putative mRNA complete cds	1.096	0.000292	MED19		MED19	1.096	mediator complex subunit 19	Nucleus	other
	TC158663	NM_001177454	Danio rerio zgc:175248 (zgc:175248) mRNA_x0001_gb-BC155343.1- Danio rerio zgc:175248 mRNA (cDNA clone MGC:175248 IMAGE:7062711) complete cds	1.095	0.001967	PRKD3		PRKD3	1.095	protein kinase D3	Nucleus	kinase
	TC169598	CU570987	Zebrafish DNA sequence from clone CH73-40A2 in linkage group 7 complete sequence	1.091	0.013924	TYRO3		TYRO3	1.091	TYRO3 protein tyrosine kinase	Plasma Membrane	kinase
	TC144333	NM_001141357	Salmo salar vestigial like 4 (Drosophila) (vgll4) mRNA_x0001_gb-BT049265.1- Salmo salar clone ssal-eve-524-326 Transcription cofactor vestigial-like protein 4 putative mRNA complete cds	1.089	0.000552	VGLL4		VGLL4	1.089	vestigial like family member 4	Nucleus	other
	TC152130	BT059114	Salmo salar clone ssal-rgf-526-102 Glyceraldehyde-3-phosphate dehydrogenase putative mRNA complete cds	1.088	0.000512	GAPDH		GAPDH	1.088	glyceraldehyde-3-phosphate dehydrogenase	Cytoplasm	enzyme
	TC151355	BT045437	Salmo salar clone ssal-rgf-521-199 Serine/threonine-protein kinase MST4 putative mRNA complete cds	1.088	0.000189	MST4		-	1.088	-	-	-
	TC138816	NM_001171853	Oncorhynchus mykiss cytokine inducible SH2-containing protein (cish) mRNA_x0001_emb-AM903340.1- Oncorhynchus mykiss mRNA for cytokine-inducible SH2-containing protein (cish gene)	1.087	0.004522	CISH		CISH	1.087	cytokine inducible SH2 containing protein	Cytoplasm	other
	TC154092	NM_001141552	Salmo salar PDZ domain-containing protein 11 (pdz11) mRNA_x0001_gb-BT050117.2- Salmo salar clone ssal-eve-563-334 PDZ domain-containing protein 11 putative mRNA complete cds	1.085	0.007326	PDZD11		PDZD11	1.085	PDZ domain containing 11	Extracellular Space	other
	TC153927	not-annotated	not-annotated	1.084	0.000272	ZFC3H1		ZFC3H1	1.084	zinc finger C3H1-type containing	Extracellular Space	other
	TC154364	BC163542	Danio rerio GLI-Kruppel family member GLI2a mRNA (cDNA clone MGC:195099 IMAGE:9038426) complete cds	1.083	0.024239	GLI2		GLI2	1.083	GLI family zinc finger 2	Nucleus	transcription regulator
	TC136469	BT073667	Oncorhynchus mykiss clone omyk-evo-512-064 C10orf104 homolog putative mRNA complete cds	1.082	0.006334	ANAPC16		ANAPC16	1.082	anaphase promoting complex subunit 16	Nucleus	other
	TC163348	BT044824	Salmo salar clone ssal-rgf-504-318 Heterogeneous nuclear ribonucleoprotein K putative mRNA complete cds	1.081	0.001157	HNRNPK		HNRNPK	1.081	heterogeneous nuclear ribonucleoprotein K	Nucleus	transcription regulator
	TC168519	not-annotated	not-annotated	1.081	0.001448	PIGW		PIGW	1.081	phosphatidylinositol glycan anchor biosynthesis class W	Cytoplasm	enzyme
	TC149522	not-annotated	not-annotated	1.08	0.019755	ANTXR2		ANTXR2	1.08	ANTXR cell adhesion molecule 2	Plasma Membrane	cell surface receptor
	TC139393	NM_001002507	Danio rerio neuritin 1 (nrn1) mRNA_x0001_gb-BC076292.1- Danio rerio neuritin 1 mRNA (cDNA clone MGC:92828 IMAGE:7090714) complete cds	1.08	0.014392	NRN1		NRN1	1.08	neuritin 1	Cytoplasm	other
	TC165823	BT045150	Salmo salar clone ssal-rgf-513-190 Bifunctional methylenetetrahydrofolate dehydrogenase/cyclohydrolase mitochondrial precursor putative mRNA complete cds	1.079	0.003307	MTHFD2		MTHFD2	1.079	methylenetetrahydrofolate dehydrogenase (NADP+ dependent) 2, methenyltetrahydrofolate cyclohydrolase	Cytoplasm	enzyme
	TC152894	not-annotated	not-annotated	1.076	0.001581	ZNF568		ZNF568	1.076	zinc finger protein 568	Other	other
	TC166645	NM_001020674	Danio rerio zgc:112282 (zgc:112282) mRNA_x0001_gb-BC095728.1- Danio rerio zgc:112282 mRNA (cDNA clone MGC:112282 IMAGE:7249858) complete cds	1.073	0.026746	GDA		GDA	1.073	guanine deaminase	Cytoplasm	enzyme
	TC138574	NM_001124673	Oncorhynchus mykiss sex hormone-binding globulin beta form (shbgb) mRNA_x0001_gb-EF577269.1- Oncorhynchus mykiss sex hormone-binding globulin beta form (SHBGb) mRNA complete cds	1.073	0.025082	SHBG		SHBG	1.073	sex hormone binding globulin	Extracellular Space	other
	TC166438	BC081394	Danio rerio zgc:101731 mRNA (cDNA clone MGC:101731 IMAGE:7228753) complete cds	1.073	0.049119	SNAP25		SNAP25	1.073	synaptosome associated protein 25	Plasma Membrane	transporter
	TC150579	NM_001032581	Takifugu rubripes adrenomedullin-1 (adm1) mRNA	1.071	0.000708	ADM		ADM	1.071	adrenomedullin	Extracellular Space	other
	TC144651	BT058720	Salmo salar clone ssal-rgf-001-050 Tubulin beta-1 chain putative mRNA complete cds	1.071	0.000216	TUBB3		TUBB3	1.071	tubulin beta 3 class III	Cytoplasm	other
	TC162857	not-annotated	not-annotated	1.068	0.000374	SERPINE1		SERPINE1	1.068	serpin family E member 1	Extracellular Space	other
	TC137013	NM_200277	Danio rerio zgc:56429 (zgc:56429) mRNA_x0001_gb-BC049312.1- Danio rerio zgc:56429 mRNA (cDNA clone MGC:56429 IMAGE:5612032) complete cds	1.067	0.030973	NAALAD2		NAALAD2	1.067	N-acetylated alpha-linked acidic dipeptidase 2	Plasma Membrane	peptidase
	TC161321	BT059141	Salmo salar clone ssal-rgf-528-005 Profilin-2 putative mRNA complete cds	1.067	0.000619	PFN2		PFN2	1.067	profilin 2	Cytoplasm	enzyme
	TC136579	CR719807	Tetraodon nigroviridis full-length cDNA	1.065	0.005436	SCAMP2		SCAMP2	1.065	secretory carrier membrane protein 2	Cytoplasm	other
	TC136290	BT059388	Salmo salar clone ssal-rgf-506-189 Stomatin-like protein 2 putative mRNA complete cds	1.065	0.008589	STOML2		STOML2	1.065	stomatin like 2	Plasma Membrane	other
	TC159584	BT048962	Salmo salar clone ssal-rgb2-575-183 Triosephosphate isomerase putative mRNA complete cds	1.065	0.005749	TPI1		TPI1	1.065	triosephosphate isomerase 1	Cytoplasm	enzyme
	IMM 177	BT072377	Salmo salar clone ssal-rgf-523-022 Eukaryotic initiation factor 4A-I putative mRNA pseudogene cds	1.06	0.006241	EIF4A		EIF4A1	1.06	eukaryotic translation initiation factor 4A1	Cytoplasm	translation regulator
	TC138314	BT047263	Salmo salar clone ssal-evf-559-220 Dexamethasone-induced Ras-related protein 1 precursor putative mRNA complete cds	1.059	0.015023	RASD1		RASD1	1.059	ras related dexamethasone induced 1	Cytoplasm	enzyme
	TC158898	BT027394	Gasterosteus aculeatus clone CFW265-F08 mRNA sequence	1.057	0.041328	SGK3		C8orf44-SGK3/SGK3	1.057	serum/glucocorticoid regulated kinase family member 3	Cytoplasm	kinase
	TC142342	AC203456	Salmo salar BAC CH214-397C7 (Children's Hospital Oakland Research Institute Atlantic Salmon BAC Library) complete sequence	1.056	0.03168	CDC42SE2		CDC42SE2	1.056	CDC42 small effector 2	Plasma Membrane	other
	TC132456	NM_001124572	Oncorhynchus mykiss IL15 receptor alpha chain isoform 3 (LOC100136332) mRNA_x0001_gb-DQ381970.1- Oncorhynchus mykiss IL15 receptor alpha chain isoform 3 mRNA complete cds	1.056	0.015154	IL15RA		IL15RA	1.056	interleukin 15 receptor subunit alpha	Plasma Membrane	cell surface receptor
	TC136217	not-annotated	not-annotated	1.054	0.027781	AXIN2		AXIN2	1.054	axin 2	Cytoplasm	other
	TC157353	not-annotated	not-annotated	1.054	0.021163	COL4A5		COL4A5	1.054	collagen type IV alpha 5 chain	Extracellular Space	other
	TC139494	NM_001165342	Salmo salar Nuclear cap-binding protein subunit 1-A (nbp1a) mRNA_x0001_gb-BT058812.1- Salmo salar clone ssal-rgf-504-292 Nuclear cap-binding protein subunit 1-A putative mRNA complete cds	1.054	0.006147	NCBP1		NCBP1	1.054	nuclear cap binding protein subunit 1	Nucleus	other
	TC154280	BC164218	Danio rerio UDP-N-acteylglucosamine pyrophosphorylase 1 mRNA (cDNA clone MGC:191393 IMAGE:100059702) complete cds	1.054	0.019136	UAP1		UAP1	1.054	UDP-N-acetylglucosamine pyrophosphorylase 1	Nucleus	enzyme
	TC172324	BC164023	Danio rerio vitamin K epoxide reductase complex subunit 1-like 1 mRNA (cDNA clone MGC:191198 IMAGE:100059507) complete cds	1.054	0.00177	VKORC1L1		VKORC1L1	1.054	vitamin K epoxide reductase complex subunit 1 like 1	Cytoplasm	enzyme
	TC151476	NM_001195818	Salmo salar sterol regulatory element binding transcription factor 1 (srebf1) mRNA_x0001_gb-HM561860.1- Salmo salar sterol regulatory element-binding protein 1 (SREBF1) mRNA complete cds	1.052	0.00078	SREBF1		SREBF1	1.052	sterol regulatory element binding transcription factor 1	Nucleus	transcription regulator
	TC138936	FQ310507	Dicentrarchus labrax chromosome sequence corresponding to linkage group 1 bottom part complete sequence	1.051	0.001752	PACSIN3		PACSIN3	1.051	protein kinase C and casein kinase substrate in neurons 3	Cytoplasm	other
	TC132666	NM_001124532	Oncorhynchus mykiss CD28-like protein (LOC100136274) mRNA_x0001_gb-AY789435.1- Oncorhynchus mykiss CD28-like protein mRNA complete cds	1.05	0.000296	CD28		CD28	1.05	CD28 molecule	Plasma Membrane	cell surface receptor
	TC161632	NM_001140381	Salmo salar receptor accessory protein 3 (reep3) mRNA_x0001_gb-BT045759.1- Salmo salar clone ssal-rgf-530-260 Receptor expression-enhancing protein 3 putative mRNA complete cds	1.049	0.000165	REEP3		REEP3	1.049	receptor accessory protein 3	Other	other
	CUST_37_PI425348775	IL-6Ralpha	0	1.047	0.000781	IL6R		IL6R	1.047	interleukin 6 receptor	Plasma Membrane	cell surface receptor
	TC142507	BT059295	Salmo salar clone ssal-rgf-539-326 Transcription factor MafB putative mRNA complete cds	1.047	0.000244	MAFB		MAFB	1.047	MAF bZIP transcription factor B	Nucleus	transcription regulator
	TC165557	BT058976	Salmo salar clone ssal-rgf-517-215 Stromal cell-derived factor 1 precursor putative mRNA complete cds	1.045	0.002352	CXCL12		CXCL12	1.045	C-X-C motif chemokine ligand 12	Extracellular Space	cytokine
	TC153999	BT082209	Anoplopoma fimbria clone afim-evh-526-038 FAM107B putative mRNA complete cds	1.045	0.00027	FAM107B		FAM107B	1.045	family with sequence similarity 107 member B	Other	other
	TC153182	BT073131	Oncorhynchus mykiss clone omyk-evn-503-049 Myosin light polypeptide 6 putative mRNA complete cds	1.045	0.041709	MYL6		MYL6	1.045	myosin light chain 6	Cytoplasm	enzyme
	TC141948	NM_001124179	Oncorhynchus mykiss SOX9 (LOC100135781) mRNA_x0001_dbj-AB006448.1- Oncorhynchus mykiss SOX9 mRNA complete cds	1.045	0.000326	SOX9		SOX9	1.045	SRY-box transcription factor 9	Nucleus	transcription regulator
	TC141573	BT079653	Esox lucius clone eluc-evq-505-016 Tubulin-specific chaperone C putative mRNA complete cds	1.045	0.006072	TBCC		TBCC	1.045	tubulin folding cofactor C	Cytoplasm	enzyme
	TC162924	X83373	S.alpinus DNA for IgM heavy chain constant region	1.042	0.003719	SEC24A		SEC24A	1.042	SEC24 homolog A, COPII coat complex component	Cytoplasm	transporter
	TC141562	BC165369	Danio rerio heat shock protein 4 like mRNA (cDNA clone MGC:192457 IMAGE:100060905) complete cds	1.04	0.0004	HSPA4		HSPA4	1.04	heat shock protein family A (Hsp70) member 4	Cytoplasm	other
	TC166098	XM_003215683	PREDICTED: Anolis carolinensis collagen alpha-1(XII) chain-like (LOC100555585) mRNA	1.039	0.005208	COL12A1		COL12A1	1.039	collagen type XII alpha 1 chain	Extracellular Space	other
	TC132327	NM_001124492	Oncorhynchus mykiss metal response element-binding transcription factor (mtf) mRNA_x0001_gb-AY586336.1- Oncorhynchus mykiss metal response element-binding transcription factor isoform H (MTF) mRNA complete cds; alternatively spliced	1.039	0.013039	MTF1		MTF1	1.039	metal regulatory transcription factor 1	Nucleus	transcription regulator
	TC154422	BT045606	Salmo salar clone ssal-rgf-526-125 Proliferation-associated protein 2G4 putative mRNA complete cds	1.039	0.027038	PA2G4		PA2G4	1.039	proliferation-associated 2G4	Nucleus	transcription regulator
	TC154500	BT072385	Salmo salar clone ssal-rgf-523-204 DNA topoisomerase 1 putative mRNA pseudogene cds	1.037	0.000114	TOP1		TOP1	1.037	DNA topoisomerase I	Nucleus	enzyme
	TC142689	XM_003225216	PREDICTED: Anolis carolinensis complement C1q tumor necrosis factor-related protein 2-like (LOC100559739) mRNA	1.035	0.018725	C1QTNF2		C1QTNF2	1.035	C1q and TNF related 2	Extracellular Space	other
	TC146265	BT046073	Salmo salar clone ssal-rgf-540-376 Transmembrane protein C1orf78 homolog putative mRNA complete cds	1.032	0.001636	EVA1B		EVA1B	1.032	eva-1 homolog B	Other	other
	TC148994	BT072175	Salmo salar clone ssal-rgf-515-081 unknown large open reading frame mRNA novel cds	1.031	0.000788	RNASEK		RNASEK	1.031	ribonuclease K	Other	peptidase
	TC140853	BT059711	Salmo salar clone ssal-rgf-524-184 Integrin beta-1 precursor putative mRNA complete cds	1.03	0.000583	ITGB1		ITGB1	1.03	integrin subunit beta 1	Plasma Membrane	cell surface receptor
	TC132883	NM_001140934	Salmo salar Glucosamine 6-phosphate N-acetyltransferase (gna1) mRNA_x0001_gb-BT047596.1- Salmo salar clone ssal-evf-579-356 Glucosamine 6-phosphate N-acetyltransferase putative mRNA complete cds	1.029	0.000131	GNPNAT1		GNPNAT1	1.029	glucosamine-phosphate N-acetyltransferase 1	Cytoplasm	enzyme
	TC166617	not-annotated	not-annotated	1.029	0.002707	GPR141		GPR141	1.029	G protein-coupled receptor 141	Plasma Membrane	G-protein coupled receptor
	TC138562	NM_001199684	Gallus gallus RNA binding motif protein 25 (RBM25) mRNA	1.028	0.000123	RBM25		RBM25	1.028	RNA binding motif protein 25	Nucleus	other
	TC145555	NM_001140238	Salmo salar Alpha-N-acetylgalactosaminide alpha-26-sialyltransferase 6 (sia7f) mRNA_x0001_gb-BT045490.1- Salmo salar clone ssal-rgf-522-377 Alpha-N-acetylgalactosaminide alpha-26-sialyltransferase 6 putative mRNA complete cds	1.026	0.003465	ST6GALNAC6		ST6GALNAC6	1.026	ST6 N-acetylgalactosaminide alpha-2,6-sialyltransferase 6	Cytoplasm	enzyme
	TC141015	not-annotated	not-annotated	1.025	0.000159	RSL1D1		RSL1D1	1.025	ribosomal L1 domain containing 1	Nucleus	other
	TC150095	not-annotated	not-annotated	1.023	0.004707	CD248		CD248	1.023	CD248 molecule	Plasma Membrane	other
	TC160523	NM_001173929	Salmo salar Stress 70 protein chaperone microsome-associated 60 kDa protein (stch) mRNA_x0001_gb-BT059111.1- Salmo salar clone ssal-rgf-526-051 Stress 70 protein chaperone microsome-associated 60 kDa protein precursor putative mRNA complete cds	1.018	0.000714	HSPA13		HSPA13	1.018	heat shock protein family A (Hsp70) member 13	Cytoplasm	other
	TC161165	BT071983	Salmo salar clone ssal-rgf-506-088 Zinc finger protein 264 putative mRNA pseudogene cds	1.018	0.010741	ZNF22		ZNF22	1.018	zinc finger protein 22	Nucleus	transcription regulator
	TC145746	BT074577	Osmerus mordax clone omor-eva-515-289 Eukaryotic peptide chain release factor subunit 1 putative mRNA complete cds	1.017	0.029137	ETF1		ETF1	1.017	eukaryotic translation termination factor 1	Cytoplasm	translation regulator
	TC149325	XR_117976	PREDICTED: Danio rerio ephrin type-A receptor 2-like (LOC568718) miscRNA	1.016	0.038216	EPHA2		EPHA2	1.016	EPH receptor A2	Plasma Membrane	kinase
	TC167517	NM_001141727	Salmo salar Bactericidal permeability-increasing protein (bpi) mRNA_x0001_gb-BT044920.1- Salmo salar clone ssal-rgf-507-125 Bactericidal permeability-increasing protein precursor putative mRNA complete cds	1.016	0.047557	LBP		LBP	1.016	lipopolysaccharide binding protein	Plasma Membrane	transporter
	TC158196	HM159470	Salmo salar clone BAC 105M10 orphan nuclear receptor Dax-1 (Dax1) gene complete cds	1.016	0.002171	RAB20		RAB20	1.016	RAB20, member RAS oncogene family	Cytoplasm	enzyme
	TC133746	NM_001165065	Oncorhynchus mykiss C4b-binding protein alpha chain (c4bp) mRNA_x0001_gb-BT073759.1- Oncorhynchus mykiss clone omyk-evo-507-165 C4b-binding protein alpha chain precursor putative mRNA complete cds	1.015	0.048228	CD46		CD46	1.015	CD46 molecule	Plasma Membrane	cell surface receptor
	TC162519	NM_001165381	Salmo salar v-crk sarcoma virus CT10 oncogene homolog (avian) (crk) mRNA_x0001_gb-BT058899.1- Salmo salar clone ssal-rgf-512-138 SH2/SH3 adaptor crk putative mRNA complete cds	1.014	0.001253	CRK		CRK	1.014	CRK proto-oncogene, adaptor protein	Cytoplasm	other
	TC139617	BT057246	Salmo salar clone ssal-evf-559-198 Transmembrane protein 179B putative mRNA complete cds	1.014	0.000152	TMEM179B		TMEM179B	1.014	transmembrane protein 179B	Nucleus	other
	TC137775	NM_001140683	Salmo salar Creatine kinase testis isozyme (kcrt) mRNA_x0001_gb-BT046620.2- Salmo salar clone ssal-eve-524-307 Creatine kinase testis isozyme putative mRNA complete cds	1.013	0.001267	CKB		CKB	1.013	creatine kinase B	Cytoplasm	kinase
	IMM 664	CR722688	Tetraodon nigroviridis full-length cDNA	1.013	0.004912	SDC4		SDC4	1.013	syndecan 4	Plasma Membrane	other
	TC147060	not-annotated	not-annotated	1.009	0.002943	COL11A1		COL11A1	1.009	collagen type XI alpha 1 chain	Extracellular Space	other
	TC159675	BT045821	Salmo salar clone ssal-rgf-532-223 Sushi domain-containing protein 3 putative mRNA complete cds	1.009	0.000805	SUSD3		SUSD3	1.009	sushi domain containing 3	Plasma Membrane	other
	TC148253	BT044698	Salmo salar clone ssal-rgf-501-044 BCL2/adenovirus E1B 19 kDa protein-interacting protein 3 putative mRNA complete cds	1.007	0.000869	BNIP3		BNIP3	1.007	BCL2 interacting protein 3	Cytoplasm	other
	TC152917	DQ839236	Salmo salar diacylglycerol O-acyltransferase-like protein 1 (DGAT1) mRNA partial cds	1.007	0.012447	DGAT1		DGAT1	1.007	diacylglycerol O-acyltransferase 1	Cytoplasm	enzyme
	TC138974	BT072169	Salmo salar clone ssal-rgf-514-349 Stress-70 protein mitochondrial precursor putative mRNA partial cds	1.007	0.000342	HSPA9		HSPA9	1.007	heat shock protein family A (Hsp70) member 9	Cytoplasm	other
	TC146096	FQ310508	Dicentrarchus labrax chromosome sequence corresponding to linkage group 18 complete sequence	1.006	0.005635	UBE3C		UBE3C	1.006	ubiquitin protein ligase E3C	Nucleus	enzyme
	TC169022	BX537348	Zebrafish DNA sequence from clone CH211-218O21 in linkage group 8 Contains the renbp gene for renin binding protein the gene for a novel protein similar to vertebrate family with sequence similarity 107 member B (FAM107B) the gene for a novel protein similar to vertebrate jumonji AT rich interactive domain 1 protein family the gene for a novel protein (zgc:162200) the gene for a novel protein sim…	1.004	0.00589	KDM5C		KDM5C	1.004	lysine demethylase 5C	Nucleus	enzyme
	TC149375	NM_001173889	Salmo salar myotubularin related protein 6 (mtmr6) mRNA_x0001_gb-BT059752.1- Salmo salar clone ssal-rgf-505-066 Myotubularin-related protein 6 putative mRNA complete cds	1.004	0.034528	MTMR6		MTMR6	1.004	myotubularin related protein 6	Cytoplasm	phosphatase
	TC145862	NM_001140366	Salmo salar Tumor protein D53 homolog (tpd53) mRNA_x0001_gb-BT045734.1- Salmo salar clone ssal-rgf-530-011 Tumor protein D53 homolog putative mRNA complete cds	1.002	0.000524	TPD52L1		TPD52L1	1.002	TPD52 like 1	Cytoplasm	other
	TC147619	not-annotated	not-annotated	1.001	0.000605	LRRC8C		LRRC8C	1.001	leucine rich repeat containing 8 VRAC subunit C	Plasma Membrane	ion channel
	TC137371	not-annotated	not-annotated	1.001	0.020556	MIA3		MIA3	1.001	MIA SH3 domain ER export factor 3	Cytoplasm	other
	TC160487	not-annotated	not-annotated	-1.001	0.000984	NSRP1		NSRP1	-1.001	nuclear speckle splicing regulatory protein 1	Nucleus	other
	TC145742	NM_001139991	Salmo salar ADP-ribosylation factor-related protein 1 (arfrp) mRNA_x0001_gb-BT045021.1- Salmo salar clone ssal-rgf-510-029 ADP-ribosylation factor-related protein 1 putative mRNA complete cds	-1.003	0.009474	ARFRP1		ARFRP1	-1.003	ADP ribosylation factor related protein 1	Cytoplasm	enzyme
	TC139747	XM_689796	PREDICTED: Danio rerio rho GTPase-activating protein 27-like (LOC566523) mRNA	-1.004	0.000393	ARHGAP27		ARHGAP27	-1.004	Rho GTPase activating protein 27	Cytoplasm	other
	TC170405	NM_001139688	Salmo salar si:dkey-15j16.2-like (LOC100194603) mRNA_x0001_gb-BT043713.1- Salmo salar clone HM5_2802 si:dkey-15j16.2-like mRNA complete cds	-1.004	0.000793	GINM1		GINM1	-1.004	glycoprotein integral membrane 1	Cytoplasm	other
	TC166227	EU816603	Salmo salar clone BAC S0142M23 complete sequence	-1.007	0.004087	MLLT1		MLLT1	-1.007	MLLT1 super elongation complex subunit	Nucleus	transcription regulator
	TC141317	not-annotated	not-annotated	-1.007	0.016106	NBN		NBN	-1.007	nibrin	Nucleus	other
	TC148952	not-annotated	not-annotated	-1.007	0.007559	PHGDH		PHGDH	-1.007	phosphoglycerate dehydrogenase	Cytoplasm	enzyme
	TC163809	BT059134	Salmo salar clone ssal-rgf-527-157 phosphatase 1K mitochondrial precursor putative mRNA complete cds	-1.007	0.005607	PPM1K		PPM1K	-1.007	protein phosphatase, Mg2+/Mn2+ dependent 1K	Cytoplasm	phosphatase
	TC133098	NM_001141832	Salmo salar RAD1 homolog (S. pombe) (rad1) mRNA_x0001_gb-BT046619.1- Salmo salar clone ssal-eve-524-305 Cell cycle checkpoint protein RAD1 putative mRNA complete cds	-1.007	0.005953	RAD1		RAD1	-1.007	RAD1 checkpoint DNA exonuclease	Nucleus	enzyme
	TC140116	XM_002663555	PREDICTED: Danio rerio phosphatidylinositol transfer protein alpha isoform-like (LOC100333060) mRNA	-1.008	0.001223	PITPNA		PITPNA	-1.008	phosphatidylinositol transfer protein alpha	Cytoplasm	transporter
	TC147638	CR728899	Tetraodon nigroviridis full-length cDNA	-1.009	0.00022	RSRC2		RSRC2	-1.009	arginine and serine rich coiled-coil 2	Other	other
	TC160495	NM_001165311	Salmo salar Heterogeneous nuclear ribonucleoprotein G (hnrpg) mRNA_x0001_gb-BT058737.1- Salmo salar clone ssal-rgf-002-150 Heterogeneous nuclear ribonucleoprotein G putative mRNA complete cds	-1.01	0.009334	RBMX		RBMX	-1.01	RNA binding motif protein X-linked	Nucleus	other
	TC152580	GU552297	Salmo salar clone BAC 24B13 genomic sequence	-1.01	0.003938	TCAIM		TCAIM	-1.01	T cell activation inhibitor, mitochondrial	Cytoplasm	other
	TC143747	not-annotated	not-annotated	-1.011	0.000484	CD2		CD2	-1.011	CD2 molecule	Plasma Membrane	cell surface receptor
	TC154350	not-annotated	not-annotated	-1.013	0.000832	OSBPL6		OSBPL6	-1.013	oxysterol binding protein like 6	Cytoplasm	other
	TC147723	BT048994	Salmo salar clone ssal-rgb-526-286 DET1- and DDB1-associated protein 1 putative mRNA complete cds	-1.014	0.028208	DDA1		DDA1	-1.014	DET1 and DDB1 associated 1	Nucleus	other
	TC142496	GQ505860	Salmo salar clone BAC CHORI214-68O19 genomic sequence	-1.014	0.017819	ZMYM3		ZMYM3	-1.014	zinc finger MYM-type containing 3	Nucleus	other
	TC132755	BT059570	Salmo salar clone ssal-rgf-527-281 Histidine triad nucleotide-binding protein 3 putative mRNA complete cds	-1.015	0.000271	HINT3		HINT3	-1.015	histidine triad nucleotide binding protein 3	Cytoplasm	enzyme
	TC136345	not-annotated	not-annotated	-1.016	0.00088	CRB3		CRB3	-1.016	crumbs cell polarity complex component 3	Cytoplasm	other
	TC157986	BT056544	Salmo salar clone ssal-rgb2-654-361 Lipopolysaccharide-induced tumor necrosis factor-alpha factor homolog putative mRNA complete cds	-1.016	0.010401	LITAF		LITAF	-1.016	lipopolysaccharide induced TNF factor	Nucleus	transcription regulator
	TC133627	AB081832	Pagrus major PC mRNA for pyruvate carboxylase partial cds	-1.018	0.004084	PC		PC	-1.018	pyruvate carboxylase	Cytoplasm	enzyme
	TC138886	not-annotated	not-annotated	-1.019	0.007199	CENPI		CENPI	-1.019	centromere protein I	Nucleus	other
	TC142150	not-annotated	not-annotated	-1.019	0.040154	STEAP3		STEAP3	-1.019	STEAP3 metalloreductase	Cytoplasm	transporter
	TC171479	NM_001076599	Danio rerio zgc:153947 (zgc:153947) mRNA_x0001_gb-BC124497.1- Danio rerio zgc:153947 mRNA (cDNA clone MGC:153947 IMAGE:7257547) complete cds	-1.02	0.012987	ARMC7		ARMC7	-1.02	armadillo repeat containing 7	Cytoplasm	other
	TC159794	not-annotated	not-annotated	-1.02	0.02492	POLE2		POLE2	-1.02	DNA polymerase epsilon 2, accessory subunit	Nucleus	enzyme
	TC137836	not-annotated	not-annotated	-1.022	0.004651	KRTAP12-2		KRTAP12-2	-1.022	keratin associated protein 12-2	Cytoplasm	other
	TC146512	BT072792	Salmo salar clone ssal-rgf-540-355 Probable Bax inhibitor 1 putative mRNA partial cds	-1.023	0.024503	TMBIM6		TMBIM6	-1.023	transmembrane BAX inhibitor motif containing 6	Nucleus	other
	TC158474	not-annotated	not-annotated	-1.024	0.001162	SEMA3D		SEMA3D	-1.024	semaphorin 3D	Extracellular Space	other
	CUST_4_PI425348775	GATA3	0	-1.025	0.001393	GATA3		GATA3	-1.025	GATA binding protein 3	Nucleus	transcription regulator
	TC133460	BT060219	Salmo salar clone ssal-rgh-509-222 Phenazine biosynthesis-like domain-containing protein 2 putative mRNA complete cds	-1.025	0.016597	PBLD		PBLD	-1.025	phenazine biosynthesis like protein domain containing	Cytoplasm	enzyme
	TC165739	BT026910	Gasterosteus aculeatus clone CFW98-B08 mRNA sequence	-1.026	0.00195	ARPC1A		ARPC1A	-1.026	actin related protein 2/3 complex subunit 1A	Extracellular Space	other
	TC147616	BT059870	Salmo salar clone ssal-rgg-506-344 Coactosin-like protein putative mRNA complete cds	-1.029	0.016383	COTL1		COTL1	-1.029	coactosin like F-actin binding protein 1	Cytoplasm	other
	TC138186	BT043584	Salmo salar clone HM4_2743 WD repeat domain containing 82 isoform 1 (wdr82) mRNA complete cds	-1.029	0.000964	TWF2		TWF2	-1.029	twinfilin actin binding protein 2	Cytoplasm	kinase
	TC134402	NM_001139841	Salmo salar F-box only protein 4 (fbx4) mRNA_x0001_gb-BT044751.1- Salmo salar clone ssal-rgf-502-233 F-box only protein 4 putative mRNA complete cds	-1.031	0.021806	FBXO4		FBXO4	-1.031	F-box protein 4	Nucleus	enzyme
	TC136553	XM_002719348	PREDICTED: Oryctolagus cuniculus mediator complex subunit 24 (LOC100357423) mRNA	-1.031	0.0002	MED24		MED24	-1.031	mediator complex subunit 24	Nucleus	transcription regulator
	TC151586	BT125478	Salmo salar clone ssal-evf-522-056 Actin-related protein 2/3 complex subunit 5 putative mRNA complete cds	-1.032	0.040129	ARPC5L		ARPC5L	-1.032	actin related protein 2/3 complex subunit 5 like	Cytoplasm	other
	TC146157	NM_001165353	Salmo salar acyl-Coenzyme A oxidase 3 pristanoyl (acox3) mRNA_x0001_gb-BT058841.1- Salmo salar clone ssal-rgf-506-253 Acyl-coenzyme A oxidase 3 peroxisomal putative mRNA complete cds	-1.036	0.024965	ACOX3		ACOX3	-1.036	acyl-CoA oxidase 3, pristanoyl	Cytoplasm	enzyme
	TC171751	not-annotated	not-annotated	-1.036	0.000262	FLG2		FLG2	-1.036	filaggrin family member 2	Cytoplasm	other
	TC160670	BT072587	Salmo salar clone ssal-rgf-531-250 Circumsporozoite protein precursor putative mRNA pseudogene cds	-1.036	0.005129	LDB3		LDB3	-1.036	LIM domain binding 3	Cytoplasm	transporter
	TC161929	NM_001173793	Salmo salar Zinc finger protein 135 (zn135) mRNA	-1.037	0.000223	ZKSCAN1		ZKSCAN1	-1.037	zinc finger with KRAB and SCAN domains 1	Nucleus	transcription regulator
	TC137060	CR727827	Tetraodon nigroviridis full-length cDNA	-1.04	0.000137	C2orf47		MAIP1	-1.04	matrix AAA peptidase interacting protein 1	Cytoplasm	other
	TC133370	BT047296	Salmo salar clone ssal-eve-501-079 Inorganic pyrophosphatase putative mRNA complete cds	-1.041	0.011152	PPA1		PPA1	-1.041	inorganic pyrophosphatase 1	Cytoplasm	enzyme
	TC134463	AM691831	Salmo salar partial tollip II gene for toll-interleukine I receptor interacting protein clone 187L8 exons 2-6	-1.041	0.002268	WDR76		WDR76	-1.041	WD repeat domain 76	Nucleus	other
	TC133840	BT045961	Salmo salar clone ssal-rgf-537-288 Succinate-semialdehyde dehydrogenase mitochondrial precursor putative mRNA complete cds	-1.042	0.000273	ALDH5A1		ALDH5A1	-1.042	aldehyde dehydrogenase 5 family member A1	Cytoplasm	enzyme
	TC162090	not-annotated	not-annotated	-1.042	0.001387	C4orf40		PRR27	-1.042	proline rich 27	Cytoplasm	other
	TC141369	BT047307	Salmo salar clone ssal-sjb-008-091 Metalloprotease ATP23 putative mRNA complete cds	-1.042	0.00097	XRCC6BP1		ATP23	-1.042	ATP23 metallopeptidase and ATP synthase assembly factor homolog	Plasma Membrane	kinase
	TC168899	CR700533	Tetraodon nigroviridis full-length cDNA	-1.043	0.00499	FAM219B		FAM219B	-1.043	family with sequence similarity 219 member B	Other	other
	TC147054	BT046629	Salmo salar clone ssal-eve-566-110 SH3 domain-binding glutamic acid-rich-like protein 3 putative mRNA complete cds	-1.043	0.0166	SH3BGRL3		SH3BGRL3	-1.043	SH3 domain binding glutamate rich protein like 3	Nucleus	other
	TC146865	BT073468	Oncorhynchus mykiss clone omyk-evn-502-051 Mitochondrial ribosomal protein S7 putative mRNA complete cds	-1.049	0.000423	MRPS7		MRPS7	-1.049	mitochondrial ribosomal protein S7	Cytoplasm	other
	TC135382	FQ310507	Dicentrarchus labrax chromosome sequence corresponding to linkage group 1 bottom part complete sequence	-1.052	0.002023	FAM109A		PHETA1	-1.052	PH domain containing endocytic trafficking adaptor 1	Cytoplasm	other
	TC163310	XM_686358	PREDICTED: Danio rerio DEP domain containing 5 (depdc5) mRNA	-1.055	0.002237	DEPDC5		DEPDC5	-1.055	DEP domain containing 5, GATOR1 subcomplex subunit	Cytoplasm	other
	TC139148	BT057355	Salmo salar clone ssal-rgb2-565-271 Poly polymerase 12 putative mRNA complete cds	-1.055	0.00334	PARP12		PARP12	-1.055	poly(ADP-ribose) polymerase family member 12	Nucleus	enzyme
	TC157150	AY158892	Oryzias latipes Tle1 mRNA partial cds	-1.056	0.03275	TLE1		TLE1	-1.056	TLE family member 1, transcriptional corepressor	Nucleus	transcription regulator
	TC139758	not-annotated	not-annotated	-1.058	5.9e-05	CNTN1		CNTN1	-1.058	contactin 1	Plasma Membrane	enzyme
	TC135404	BT044691	Salmo salar clone ssal-rgf-002-369 Long-chain specific acyl-CoA dehydrogenase mitochondrial precursor putative mRNA complete cds	-1.063	0.001374	ACADL		ACADL	-1.063	acyl-CoA dehydrogenase long chain	Cytoplasm	enzyme
	TC136733	BT047163	Salmo salar clone ssal-rgb2-501-155 C10orf84 homolog putative mRNA complete cds	-1.064	0.000333	FAM204A		FAM204A	-1.064	family with sequence similarity 204 member A	Other	other
	TC166058	NM_001173589	Salmo salar Erlin-2 (erln2) mRNA_x0001_gb-BT059000.1- Salmo salar clone ssal-rgf-518-378 Erlin-2 precursor putative mRNA complete cds	-1.065	0.000111	ERLIN2		ERLIN2	-1.065	ER lipid raft associated 2	Cytoplasm	other
	TC136535	NM_001160517	Oncorhynchus mykiss HSPC020 homolog (hs020) mRNA_x0001_gb-BT073037.1- Oncorhynchus mykiss clone omyk-evn-504-099 HSPC020 homolog putative mRNA complete cds	-1.068	0.006	ANAPC15		ANAPC15	-1.068	anaphase promoting complex subunit 15	Nucleus	other
	TC171603	not-annotated	not-annotated	-1.068	0.00066	FAM47C		FAM47C	-1.068	family with sequence similarity 47 member C	Other	other
	TC142056	BT074327	Oncorhynchus mykiss clone omyk-evo-512-160 Co-chaperone protein HscB mitochondrial precursor putative mRNA complete cds	-1.068	0.000328	HSCB		HSCB	-1.068	HscB mitochondrial iron-sulfur cluster cochaperone	Cytoplasm	other
	TC146468	not-annotated	not-annotated	-1.069	0.001428	DTX3		DTX3	-1.069	deltex E3 ubiquitin ligase 3	Cytoplasm	other
	TC164481	CR643521	Tetraodon nigroviridis full-length cDNA	-1.069	0.009688	NSMCE4A		NSMCE4A	-1.069	NSE4 homolog A, SMC5-SMC6 complex component	Nucleus	other
	TC158563	CR751608	Zebrafish DNA sequence from clone DKEY-41E15 in linkage group 12 complete sequence	-1.073	0.000179	ALDH18A1		ALDH18A1	-1.073	aldehyde dehydrogenase 18 family member A1	Cytoplasm	kinase
	IMM 1092	Y08604	O.mykiss mRNA for Ig heavy chain variable region (cRTVH40)	-1.074	0.002088	IGHV3-11		IGHV3-11	-1.074	immunoglobulin heavy variable 3-11 (gene/pseudogene)	Other	other
	TC147705	NM_001009587	Danio rerio protocadherin 2 alpha a 3 (pcdh2aa3) mRNA_x0001_dbj-AB160959.1- Danio rerio Pcdh mRNA for protocadherin1-alpha-av3 complete cds	-1.074	0.046534	PCDHA7		PCDHA7	-1.074	protocadherin alpha 7	Plasma Membrane	other
	TC151262	BT045429	Salmo salar clone ssal-rgf-521-119 Transmembrane protein 127 putative mRNA complete cds	-1.075	0.000129	TMEM127		TMEM127	-1.075	transmembrane protein 127	Other	other
	TC141055	not-annotated	not-annotated	-1.076	0.008594	BMI1		BMI1	-1.076	BMI1 proto-oncogene, polycomb ring finger	Nucleus	transcription regulator
	TC168374	NM_001145567	Danio rerio exosome component 1 (exosc1) mRNA	-1.076	0.036255	EXOSC1		EXOSC1	-1.076	exosome component 1	Nucleus	enzyme
	TC156494	NM_001165320	Salmo salar ATG7 autophagy related 7 homolog (S. cerevisiae) (atg7) mRNA_x0001_gb-BT058768.1- Salmo salar clone ssal-rgf-502-016 Autophagy-related protein 7 putative mRNA complete cds	-1.08	0.048244	ATG7		ATG7	-1.08	autophagy related 7	Cytoplasm	enzyme
	TC140864	NM_205636	Danio rerio zgc:77312 (zgc:77312) mRNA_x0001_gb-BC065338.1- Danio rerio zgc:77312 mRNA (cDNA clone MGC:77312 IMAGE:6966461) complete cds	-1.08	0.00019	INO80E		INO80E	-1.08	INO80 complex subunit E	Nucleus	other
	TC146249	NM_001140029	Salmo salar ilvB (bacterial acetolactate synthase)-like (ilvbl) mRNA_x0001_gb-BT045095.1- Salmo salar clone ssal-rgf-511-330 Acetolactate synthase-like protein putative mRNA complete cds	-1.081	0.002043	ILVBL		ILVBL	-1.081	ilvB acetolactate synthase like	Cytoplasm	enzyme
	TC150038	not-annotated	not-annotated	-1.082	0.000182	HEBP2		HEBP2	-1.082	heme binding protein 2	Cytoplasm	other
	TC138727	BT026586	Gasterosteus aculeatus clone CEC10-H02 mRNA sequence	-1.082	0.000326	TMEM167B		TMEM167B	-1.082	transmembrane protein 167B	Cytoplasm	other
	TC158459	XM_001345861	PREDICTED: Danio rerio zinc finger protein 644 (znf644) mRNA	-1.082	0.00146	ZNF644		ZNF644	-1.082	zinc finger protein 644	Nucleus	transcription regulator
	TC148009	BT072422	Salmo salar clone ssal-rgf-525-051 Conserved oligomeric Golgi complex component 4 putative mRNA pseudogene cds	-1.083	0.000221	COG4		COG4	-1.083	component of oligomeric golgi complex 4	Cytoplasm	transporter
	TC159331	BT026745	Gasterosteus aculeatus clone CFW18-E11 mRNA sequence	-1.084	0.001897	THOC3		THOC3	-1.084	THO complex 3	Nucleus	other
	TC166562	NM_001141363	Salmo salar 6-pyruvoyl tetrahydropterin synthase (ptps) mRNA_x0001_gb-BT049287.1- Salmo salar clone ssal-eve-574-046 6-pyruvoyl tetrahydrobiopterin synthase putative mRNA complete cds	-1.085	0.017848	PTS		PTS	-1.085	6-pyruvoyltetrahydropterin synthase	Cytoplasm	enzyme
	IMM 929	NM_001124377	Oncorhynchus mykiss heat shock factor 2 (hsf2) mRNA_x0001_emb-AJ488177.1- Oncorhynchus mykiss mRNA for heat shock factor 2 (hsf2 gene)	-1.086	0.000107	HSF2		HSF2	-1.086	heat shock transcription factor 2	Nucleus	transcription regulator
	TC138780	EU025717	Salmo salar coiled-coil transcriptional coactivator b (Kiaa1536) homeobox protein HoxC13bb (HoxC13bb) homeobox protein HoxC12bb (HoxC12bb) and homeobox protein HoxC11bb (HoxC11bb) genes complete cds; HoxC10bb (HoxC10bb) pseudogene partial sequence; and homeobox protein HoxC9bb (HoxC9bb) homeobox protein HoxC8bb (HoxC8bb) homeobox protein HoxC6bb (HoxC6bb) homeobox protein HoxC5bb (HoxC5bb) homeob…	-1.087	0.004715	BLOC1S5		BLOC1S5	-1.087	biogenesis of lysosomal organelles complex 1 subunit 5	Extracellular Space	other
	TC154704	BT059176	Salmo salar clone ssal-rgf-530-254 ATP-binding cassette sub-family B member 8 mitochondrial precursor putative mRNA complete cds	-1.088	0.005278	ABCB8		ABCB8	-1.088	ATP binding cassette subfamily B member 8	Cytoplasm	transporter
	TC167021	FQ310506	Dicentrarchus labrax chromosome sequence corresponding to linkage group 1 top part complete sequence	-1.089	0.014736	RPN2		RPN2	-1.089	ribophorin II	Cytoplasm	enzyme
	TC145013	AJ402837	Salmo salar microsatellite DNA clone 33G12UOS	-1.09	0.018317	ABR		ABR	-1.09	ABR activator of RhoGEF and GTPase	Cytoplasm	other
	TC155534	NM_199546	Danio rerio chromatin target of PRMT1a (chtopa) mRNA_x0001_gb-BC045295.1- Danio rerio zgc:55292 mRNA (cDNA clone MGC:55292 IMAGE:2600195) complete cds	-1.091	0.035113	CHTOP		CHTOP	-1.091	chromatin target of PRMT1	Nucleus	other
	TC145122	not-annotated	not-annotated	-1.092	0.010422	FUCA1		FUCA1	-1.092	alpha-L-fucosidase 1	Cytoplasm	enzyme
	TC136767	not-annotated	not-annotated	-1.092	0.001871	GTF3C5		GTF3C5	-1.092	general transcription factor IIIC subunit 5	Nucleus	transcription regulator
	TC133411	BT074046	Oncorhynchus mykiss clone omyk-evo-510-212 Mitochondrial import inner membrane translocase subunit Tim8 A putative mRNA complete cds	-1.092	0.000315	TIMM8A		TIMM8A	-1.092	translocase of inner mitochondrial membrane 8A	Cytoplasm	transporter
	TC151093	BT044981	Salmo salar clone ssal-rgf-508-383 Histone deacetylase 3 putative mRNA complete cds	-1.093	0.002717	HDAC3		HDAC3	-1.093	histone deacetylase 3	Nucleus	transcription regulator
	TC141565	BT027349	Gasterosteus aculeatus clone CFW249-H07 mRNA sequence	-1.093	0.019294	RNF144B		RNF144B	-1.093	ring finger protein 144B	Cytoplasm	enzyme
	TC151660	BT072487	Salmo salar clone ssal-rgf-527-190 Short-chain specific acyl-CoA dehydrogenase mitochondrial precursor putative mRNA pseudogene cds	-1.095	0.040195	ACADS		ACADS	-1.095	acyl-CoA dehydrogenase short chain	Cytoplasm	enzyme
	TC169393	NM_001124376	Oncorhynchus mykiss keratin 13 (k13) mRNA_x0001_emb-AJ427867.1- Oncorhynchus mykiss mRNA for Keratin 13 (k13 gene)	-1.095	0.001208	KRT14		KRT14	-1.095	keratin 14	Cytoplasm	other
	TC152607	BT072301	Salmo salar clone ssal-rgf-520-187 Pinin putative mRNA partial cds	-1.099	0.01209	PNN		PNN	-1.099	pinin, desmosome associated protein	Plasma Membrane	other
	TC164660	XM_001345130	PREDICTED: Danio rerio transcription factor 20-like (LOC100006417) mRNA	-1.099	0.000154	TCF20		TCF20	-1.099	transcription factor 20	Nucleus	transcription regulator
	TC154716	NM_001139864	Salmo salar U4/U6 small nuclear ribonucleoprotein Prp4 (prp4) mRNA_x0001_gb-BT044787.1- Salmo salar clone ssal-rgf-503-298 U4/U6 small nuclear ribonucleoprotein Prp4 putative mRNA complete cds	-1.101	0.003283	PRPF4		PRPF4	-1.101	pre-mRNA processing factor 4	Nucleus	other
	TC138279	BT050295	Salmo salar clone ssal-eve-546-232 Cornifelin homolog A putative mRNA complete cds	-1.103	0.001096	PLAC8		PLAC8	-1.103	placenta associated 8	Nucleus	other
	TC163357	AM887829	Oncorhynchus mykiss mRNA for fish virus induced TRIM protein (finTRIM gene) clone LV11	-1.103	0.000107	TRIM47		TRIM47	-1.103	tripartite motif containing 47	Cytoplasm	enzyme
	TC147071	not-annotated	not-annotated	-1.104	0.001961	GPR110		ADGRF1	-1.104	adhesion G protein-coupled receptor F1	Plasma Membrane	G-protein coupled receptor
	TC142020	NM_001140853	Salmo salar 17-beta-hydroxysteroid dehydrogenase 14 (dhb14) mRNA_x0001_gb-BT047261.1- Salmo salar clone ssal-evd-550-355 17-beta-hydroxysteroid dehydrogenase 14 putative mRNA complete cds	-1.106	0.00012	HSD17B14		HSD17B14	-1.106	hydroxysteroid 17-beta dehydrogenase 14	Cytoplasm	enzyme
	TC133740	BT027629	Gasterosteus aculeatus clone CGX68-A06 mRNA sequence	-1.106	0.011237	OBFC1		STN1	-1.106	STN1 subunit of CST complex	Nucleus	other
	TC163947	NM_001173965	Salmo salar histidine decarboxylase (hdc) mRNA_x0001_gb-BT059714.1- Salmo salar clone ssal-rgf-002-135 Headcase protein homolog putative mRNA complete cds	-1.11	0.001291	HECA		HECA	-1.11	hdc homolog, cell cycle regulator	Nucleus	other
	TC143335	not-annotated	not-annotated	-1.11	0.000786	TRAF5		TRAF5	-1.11	TNF receptor associated factor 5	Cytoplasm	transporter
	TC132800	BT074481	Osmerus mordax clone omor-eva-509-107 tRNA guanine-N1 methyltransferase putative mRNA complete cds	-1.11	0.000557	TRMT10A		TRMT10A	-1.11	tRNA methyltransferase 10A	Cytoplasm	enzyme
	TC161147	BC131863	Danio rerio zgc:136718 mRNA (cDNA clone MGC:158192 IMAGE:6965524) complete cds	-1.11	0.045198	TTC8		TTC8	-1.11	tetratricopeptide repeat domain 8	Cytoplasm	other
	TC151247	CR700599	Tetraodon nigroviridis full-length cDNA	-1.113	0.013284	GPX2		GPX2	-1.113	glutathione peroxidase 2	Cytoplasm	enzyme
	TC158528	GU817336	Salmo salar clone BAC CHORI214-109F19 complete sequence	-1.113	0.007205	IGLV9-49		IGLV9-49	-1.113	immunoglobulin lambda variable 9-49	Other	other
	TC139111	CR666626	Tetraodon nigroviridis full-length cDNA	-1.113	0.002022	MEF2BNB		BORCS8	-1.113	BLOC-1 related complex subunit 8	Cytoplasm	other
	TC167495	XM_684442	PREDICTED: Danio rerio inhibitor of kappa light polypeptide gene enhancer in B-cells kinase complex-associated protein like (ikbkapl) mRNA	-1.114	0.018211	IKBKAP		ELP1	-1.114	elongator complex protein 1	Cytoplasm	other
	TC132423	NM_001124193	Oncorhynchus mykiss Vasa (vas) mRNA_x0001_dbj-AB032566.1- Oncorhynchus mykiss vas mRNA for Vasa complete cds	-1.115	0.003223	DDX4		DDX4	-1.115	DEAD-box helicase 4	Nucleus	enzyme
	TC155540	NM_001160574	Oncorhynchus mykiss Checkpoint protein HUS1 (hus1) mRNA_x0001_gb-BT073238.1- Oncorhynchus mykiss clone omyk-evn-514-010 Checkpoint protein HUS1 putative mRNA complete cds	-1.115	0.047206	HUS1		HUS1	-1.115	HUS1 checkpoint clamp component	Nucleus	kinase
	TC139833	BT044937	Salmo salar clone ssal-rgf-508-033 Transmembrane protein 59 precursor putative mRNA complete cds	-1.117	0.027611	TMEM59		TMEM59	-1.117	transmembrane protein 59	Plasma Membrane	peptidase
	TC152312	NM_001140098	Salmo salar target of EGR1 member 1 (nuclear) (toe1) mRNA_x0001_gb-BT045237.1- Salmo salar clone ssal-rgf-516-042 Target of EGR1 protein 1 putative mRNA complete cds	-1.117	0.000359	TOE1		TOE1	-1.117	target of EGR1, exonuclease	Nucleus	enzyme
	TC148742	BT125258	Salmo salar clone ssal-sjb-012-125 ADP-ribosylation factor-like protein 2-binding protein putative mRNA complete cds	-1.118	0.001182	ARL2BP		ARL2BP	-1.118	ADP ribosylation factor like GTPase 2 binding protein	Cytoplasm	transcription regulator
	TC150957	NM_001141748	Salmo salar Mannose-1-phosphate guanyltransferase alpha-A (gmpaa) mRNA_x0001_gb-BT045178.1- Salmo salar clone ssal-rgf-514-090 Mannose-1-phosphate guanyltransferase alpha-A putative mRNA complete cds	-1.119	0.000269	GMPPA		GMPPA	-1.119	GDP-mannose pyrophosphorylase A	Cytoplasm	enzyme
	TC134083	NM_001146517	Salmo salar Anaphase-promoting complex subunit 7 (apc7) mRNA_x0001_gb-BT059012.1- Salmo salar clone ssal-rgf-519-330 Anaphase-promoting complex subunit 7 putative mRNA complete cds	-1.121	0.002517	ANAPC7		ANAPC7	-1.121	anaphase promoting complex subunit 7	Nucleus	other
	TC153191	CR659263	Tetraodon nigroviridis full-length cDNA	-1.122	0.000167	TMEM221		TMEM221	-1.122	transmembrane protein 221	Other	other
	TC138144	NM_001173674	Salmo salar TATA box binding protein (tbp) mRNA_x0001_gb-BT059217.1- Salmo salar clone ssal-rgf-534-063 TATA-box-binding protein putative mRNA complete cds	-1.123	0.00068	TBP		TBP	-1.123	TATA-box binding protein	Nucleus	transcription regulator
	TC145741	BT027464	Gasterosteus aculeatus clone CGX06-H04 mRNA sequence	-1.124	0.001106	GPSM2		GPSM2	-1.124	G protein signaling modulator 2	Nucleus	other
	CUST_103_PI420312184	NM_001171901	Oncorhynchus mykiss interferon-induced GTP-binding protein Mx (mx) mRNA_x0001_gb-U30253.1-OMU30253 Oncorhynchus mykiss Mx1 protein mRNA complete cds	-1.125	0.005674	MX1		MX1	-1.125	MX dynamin like GTPase 1	Cytoplasm	enzyme
	TC146643	BT125306	Salmo salar clone ssal-eve-518-140 Phosphoserine phosphatase putative mRNA complete cds	-1.125	0.000273	PSPH		PSPH	-1.125	phosphoserine phosphatase	Cytoplasm	phosphatase
	TC159595	NM_001141761	Salmo salar Alpha-13-mannosyl-glycoprotein 2-beta-N-acetylglucosaminyltransferase (mgat1) mRNA_x0001_gb-BT045377.1- Salmo salar clone ssal-rgf-519-282 Alpha-13-mannosyl-glycoprotein 2-beta-N-acetylglucosaminyltransferase putative mRNA complete cds	-1.126	0.000107	MGAT1		MGAT1	-1.126	alpha-1,3-mannosyl-glycoprotein 2-beta-N-acetylglucosaminyltransferase	Cytoplasm	enzyme
	TC145218	NM_001140509	Salmo salar Soluble calcium-activated nucleotidase 1 (cant1) mRNA_x0001_gb-BT045995.1- Salmo salar clone ssal-rgf-538-267 Soluble calcium-activated nucleotidase 1 putative mRNA complete cds	-1.128	0.002137	CANT1		CANT1	-1.128	calcium activated nucleotidase 1	Extracellular Space	enzyme
	TC142094	NM_001173802	Salmo salar negative regulator of ubiquitin-like proteins 1 (nub1) mRNA_x0001_gb-BT059536.1- Salmo salar clone ssal-rgf-517-165 NEDD8 ultimate buster 1 putative mRNA complete cds	-1.129	0.001907	NUB1		NUB1	-1.129	negative regulator of ubiquitin like proteins 1	Nucleus	other
	TC139247	NM_001139650	Salmo salar phosphorylase glycogen (muscle) A (pygma) mRNA_x0001_gb-BT043614.1- Salmo salar clone HM4_3578 glycogen phosphorylase (pygma) mRNA complete cds	-1.129	0.037948	PYGM		PYGM	-1.129	glycogen phosphorylase, muscle associated	Cytoplasm	enzyme
	TC135739	not-annotated	not-annotated	-1.13	0.000212	LSM11		LSM11	-1.13	LSM11, U7 small nuclear RNA associated	Nucleus	other
	TC168523	NM_001146648	Salmo salar Zinc finger protein 391 (zn391) mRNA_x0001_gb-BT056386.1- Salmo salar clone ssal-eve-563-079 Zinc finger protein 391 putative mRNA complete cds	-1.134	0.038388	ZNF436		ZNF436	-1.134	zinc finger protein 436	Nucleus	transcription regulator
	TC144078	CR792439	Zebrafish DNA sequence from clone DKEYP-100A1 in linkage group 8 Contains the 3' end of the gene for a novel protein similar to vertebrate Rho guanine exchange factor (GEF) 16 (ARHGEF16) the ybx1 gene for Y box binding protein 1 the gene for a novel protein similar to vertebrate 510-methylenetetrahydrofolate reductase (NADPH) (MTHFR) the ppih gene for peptidylprolyl isomerase H (cyclophilin H) th…	-1.135	9.5e-05	ARHGEF16		ARHGEF16	-1.135	Rho guanine nucleotide exchange factor 16	Cytoplasm	other
	TC161903	BT074748	Osmerus mordax clone omor-eva-503-377 Argininosuccinate lyase putative mRNA complete cds	-1.135	0.000561	ASL		ASL	-1.135	argininosuccinate lyase	Cytoplasm	enzyme
	TC163383	NM_001140958	Salmo salar Eukaryotic initiation factor 4A-III (if4a3) mRNA_x0001_gb-BT047669.1- Salmo salar clone ssal-evf-546-327 Eukaryotic initiation factor 4A-III putative mRNA complete cds	-1.136	0.004424	EIF4A3		EIF4A3	-1.136	eukaryotic translation initiation factor 4A3	Nucleus	enzyme
	TC145648	EF427381	Salmo salar clone BAC CHORI214-30C23 complete sequence	-1.136	0.000123	KIFC1		KIFC1	-1.136	kinesin family member C1	Nucleus	enzyme
	TC152417	NM_001165073	Oncorhynchus mykiss Mortality factor 4-like protein 1 (mo4l1) mRNA_x0001_gb-BT073803.1- Oncorhynchus mykiss clone omyk-evo-502-177 Mortality factor 4-like protein 1 putative mRNA complete cds	-1.137	0.000269	MORF4L1		MORF4L1	-1.137	mortality factor 4 like 1	Nucleus	other
	TC150896	NM_001146622	Salmo salar Pancreatic secretory trypsin inhibitor (isk1) mRNA_x0001_gb-BT057762.1- Salmo salar clone ssal-plnb-021-118 Pancreatic secretory trypsin inhibitor putative mRNA complete cds	-1.137	5.7e-05	SPINK2		SPINK2	-1.137	serine peptidase inhibitor Kazal type 2	Extracellular Space	other
	TC164318	not-annotated	not-annotated	-1.137	0.010575	TMPRSS13		TMPRSS13	-1.137	transmembrane serine protease 13	Other	peptidase
	TC151098	GQ505860	Salmo salar clone BAC CHORI214-68O19 genomic sequence	-1.139	0.012079	PEX1		PEX1	-1.139	peroxisomal biogenesis factor 1	Cytoplasm	enzyme
	TC143106	not-annotated	not-annotated	-1.139	0.00027	SNAP47		SNAP47	-1.139	synaptosome associated protein 47	Plasma Membrane	other
	IMM 793	AF115536	Oncorhynchus mykiss TAP1 protein (OnmyTAP1) mRNA OnmyTAP1*01 allele complete cds	-1.14	0.02025	TAP1		TAP1	-1.14	transporter 1, ATP binding cassette subfamily B member	Cytoplasm	transporter
	TC167747	BT125192	Salmo salar clone ssal-rgb2-575-239 Probable UPF0334 kinase-like protein C1orf57 putative mRNA complete cds	-1.143	0.030115	NTPCR		NTPCR	-1.143	nucleoside-triphosphatase, cancer-related	Cytoplasm	other
	TC138045	NM_001140312	Salmo salar N-sulphoglucosamine sulphohydrolase (sphm) mRNA_x0001_gb-BT045632.1- Salmo salar clone ssal-rgf-527-081 N-sulphoglucosamine sulphohydrolase precursor putative mRNA complete cds	-1.144	0.031145	SGSH		SGSH	-1.144	N-sulfoglucosamine sulfohydrolase	Cytoplasm	enzyme
	TC138100	NM_001173906	Salmo salar Probable O-sialoglycoprotein endopeptidase (gcp) mRNA_x0001_gb-BT060292.1- Salmo salar clone ssal-rgh-512-303 Probable O-sialoglycoprotein endopeptidase putative mRNA complete cds	-1.145	0.001273	OSGEP		OSGEP	-1.145	O-sialoglycoprotein endopeptidase	Nucleus	peptidase
	TC165398	NM_001140814	Salmo salar Pro-neuregulin-4 membrane-bound isoform (nrg4) mRNA_x0001_gb-BT047116.1- Salmo salar clone ssal-eve-541-115 Pro-neuregulin-4 membrane-bound isoform putative mRNA complete cds	-1.146	0.003169	NRG4		NRG4	-1.146	neuregulin 4	Extracellular Space	growth factor
	TC138770	not-annotated	not-annotated	-1.148	0.022518	PNKP		PNKP	-1.148	polynucleotide kinase 3'-phosphatase	Nucleus	kinase
	TC147511	NM_001139611	Salmo salar CMP-sialic acid transporter (slc35a1) mRNA_x0001_gb-BT043545.1- Salmo salar clone HM4_1930 CMP-sialic acid transporter (slc35a1) mRNA complete cds	-1.15	0.044784	SLC35A1		SLC35A1	-1.15	solute carrier family 35 member A1	Cytoplasm	transporter
	TC144325	NM_001141259	Salmo salar ring finger protein 41 (rnf41) mRNA_x0001_gb-BT048819.1- Salmo salar clone ssal-rgb2-522-318 E3 ubiquitin-protein ligase NRDP1 putative mRNA complete cds	-1.152	0.00079	RNF41		RNF41	-1.152	ring finger protein 41	Cytoplasm	enzyme
	TC138538	BT073775	Oncorhynchus mykiss clone omyk-evo-514-199 Histone H1x putative mRNA complete cds	-1.153	0.000166	H1FX		H1-10	-1.153	H1.10 linker histone	Nucleus	other
	TC138308	not-annotated	not-annotated	-1.153	0.009681	NPIPL3		NPIPB5 (includes others)	-1.153	nuclear pore complex interacting protein family member B5	Nucleus	other
	TC134063	BT073109	Oncorhynchus mykiss clone omyk-evn-505-102 Hypothetical 18.4 kDa protein in SIS2-MTD1 intergenic region putative mRNA complete cds	-1.154	0.000121	C2orf76		C2orf76	-1.154	chromosome 2 open reading frame 76	Other	other
	TC158503	NM_001089540	Danio rerio si:ch211-194d6.5 (si:ch211-194d6.5) transcript variant 1 mRNA	-1.155	0.000178	TBCCD1		TBCCD1	-1.155	TBCC domain containing 1	Cytoplasm	other
	TC157732	NM_001140617	Salmo salar Bardet-Biedl syndrome 5 (bbs5) mRNA_x0001_gb-BT046394.1- Salmo salar clone ssal-eve-576-064 Bardet-Biedl syndrome 5 protein homolog putative mRNA complete cds	-1.156	0.001808	BBS5		BBS5	-1.156	Bardet-Biedl syndrome 5	Cytoplasm	other
	TC141467	BT059457	Salmo salar clone ssal-rgf-519-117 Catalase putative mRNA complete cds	-1.156	0.020347	CAT		CAT	-1.156	catalase	Cytoplasm	enzyme
	TC172078	XM_003198928	PREDICTED: Danio rerio uncharacterized protein C11orf95 homolog (LOC100534864) mRNA	-1.164	0.023132	C11orf84		SPINDOC	-1.164	spindlin interactor and repressor of chromatin binding	Other	other
	TC166666	HM159470	Salmo salar clone BAC 105M10 orphan nuclear receptor Dax-1 (Dax1) gene complete cds	-1.167	0.007306	GPS1		GPS1	-1.167	G protein pathway suppressor 1	Nucleus	other
	TC159281	BT081033	Caligus clemensi clone ccle-evs-520-251 Peroxiredoxin-1 putative mRNA complete cds	-1.169	0.016935	PRDX2		PRDX2	-1.169	peroxiredoxin 2	Cytoplasm	enzyme
	TC132346	NM_001124455	Oncorhynchus mykiss epithelial calcium channel (ecac) mRNA_x0001_gb-AY256348.1- Oncorhynchus mykiss epithelial calcium channel (ECaC) mRNA complete cds	-1.173	7.8e-05	TRPV6		TRPV6	-1.173	transient receptor potential cation channel subfamily V member 6	Plasma Membrane	ion channel
	TC138137	BT057855	Salmo salar clone ssal-evf-529-159 C1orf149 homolog putative mRNA complete cds	-1.174	0.000116	MEAF6		MEAF6	-1.174	MYST/Esa1 associated factor 6	Nucleus	other
	TC165902	CU012044	Zebrafish DNA sequence from clone CH211-223P9 in linkage group 19 Contains the 3' end of the gene for a novel protein similar to vertebrate UNC-112 related protein 2 (URP2) the gene for a novel protein similar to vertebrate HIV-1 Tat interacting protein 60kDa (HTATIP zgc:110752) the gene for a novel protein similar to human meningioma (disrupted in balanced translocation) 1 (MN1) and five CpG isl…	-1.179	0.001266	MN1		MN1	-1.179	MN1 proto-oncogene, transcriptional regulator	Nucleus	other
	TC142440	BT045571	Salmo salar clone ssal-rgf-525-069 ADP-ribosylation factor-like protein 9 putative mRNA complete cds	-1.18	0.003051	ARL9		ARL9	-1.18	ADP ribosylation factor like GTPase 9	Other	other
	TC150900	BT071948	Salmo salar clone ssal-rgf-504-316 Copine-2 putative mRNA pseudogene cds	-1.181	0.032999	CPNE2		CPNE2	-1.181	copine 2	Cytoplasm	other
	TC160961	not-annotated	not-annotated	-1.184	0.000201	ASPM		ASPM	-1.184	assembly factor for spindle microtubules	Nucleus	other
	TC134223	NM_001140611	Salmo salar Tyrosine-protein kinase SRK2 (srk2) mRNA_x0001_gb-BT046361.1- Salmo salar clone ssal-sjb-009-071 Tyrosine-protein kinase SRK2 putative mRNA complete cds	-1.184	7.1e-05	FRK		FRK	-1.184	fyn related Src family tyrosine kinase	Nucleus	kinase
	TC157655	NM_001140760	Salmo salar cleavage and polyadenylation factor subunit homolog (S. cerevisiae) (pcf11) mRNA_x0001_gb-BT046915.2- Salmo salar clone ssal-rgb2-633-070 Pre-mRNA cleavage complex 2 protein Pcf11 putative mRNA complete cds	-1.184	0.000126	PCF11		PCF11	-1.184	PCF11 cleavage and polyadenylation factor subunit	Nucleus	other
	TC158415	BT059224	Salmo salar clone ssal-rgf-534-311 Heterogeneous nuclear ribonucleoprotein R putative mRNA complete cds	-1.187	0.031317	HNRNPR		HNRNPR	-1.187	heterogeneous nuclear ribonucleoprotein R	Nucleus	other
	TC152453	NM_001139860	Salmo salar Keratinocytes-associated transmembrane protein 2 (kct2) mRNA_x0001_gb-BT044782.1- Salmo salar clone ssal-rgf-503-236 Keratinocytes-associated transmembrane protein 2 precursor putative mRNA complete cds	-1.2	0.015077	C2orf16		C2orf16	-1.2	chromosome 2 open reading frame 16	Other	other
	TC169062	NM_001139772	Salmo salar EH domain-containing protein 4 (ehd4) mRNA_x0001_gb-BT044629.1- Salmo salar clone ssal-rgf-001-151 EH domain-containing protein 4 putative mRNA complete cds	-1.202	0.035802	EHD4		EHD4	-1.202	EH domain containing 4	Plasma Membrane	enzyme
	TC134430	not-annotated	not-annotated	-1.203	7.4e-05	ZNF778		ZNF778	-1.203	zinc finger protein 778	Nucleus	transcription regulator
	CUST_20_PI420312184	NM_001124333	Oncorhynchus mykiss VHSV-induced protein-4 (LOC100135996) mRNA_x0001_gb-AF483530.1- Oncorhynchus mykiss VHSV-induced protein-4 mRNA complete cds	-1.204	0.001289	IFIT5		IFIT5	-1.204	interferon induced protein with tetratricopeptide repeats 5	Plasma Membrane	other
	TC168475	AC145765	Gasterosteus aculeatus clone CH213-7I21 complete sequence	-1.204	3.8e-05	POF1B		POF1B	-1.204	POF1B actin binding protein	Plasma Membrane	other
	TC133421	BT028243	Gasterosteus aculeatus clone CNB168-D06 mRNA sequence	-1.206	0.048775	GOLT1B		GOLT1B	-1.206	golgi transport 1B	Cytoplasm	other
	TC169695	NM_001124628	Oncorhynchus mykiss beta-3a-adrenergic receptor (LOC100136655) mRNA_x0001_gb-AY216465.1- Oncorhynchus mykiss beta-3a-adrenergic receptor mRNA complete cds	-1.207	0.000482	ADRB1		ADRB1	-1.207	adrenoceptor beta 1	Plasma Membrane	G-protein coupled receptor
	TC167553	BC092364	Danio rerio zgc:171416 mRNA (cDNA clone IMAGE:7145273) partial cds	-1.208	0.004527	TONSL		TONSL	-1.208	tonsoku like, DNA repair protein	Cytoplasm	transcription regulator
	TC148504	NM_001139923	Salmo salar Beta-catenin-interacting protein 1 (cnbp1) mRNA_x0001_gb-BT044889.1- Salmo salar clone ssal-rgf-506-263 Beta-catenin-interacting protein 1 putative mRNA complete cds	-1.214	0.024131	CTNNBIP1		CTNNBIP1	-1.214	catenin beta interacting protein 1	Cytoplasm	other
	TC156731	DQ812886	Silurus lanzhouensis sarcoendoplasmic reticulum calcium ATPase (SERCA2) mRNA partial cds	-1.215	0.047206	ATP2A2		ATP2A2	-1.215	ATPase sarcoplasmic/endoplasmic reticulum Ca2+ transporting 2	Cytoplasm	transporter
	TC152626	NM_001165391	Salmo salar cyclin D1 (ccnd1) mRNA_x0001_gb-BT058919.1- Salmo salar clone ssal-rgf-513-156 G1/S-specific cyclin-D1 putative mRNA complete cds	-1.215	0.001647	CCND1		CCND1	-1.215	cyclin D1	Nucleus	transcription regulator
	TC135789	NM_001139934	Salmo salar Methyl-CpG-binding domain protein 3 (mbd3) mRNA_x0001_gb-BT044912.1- Salmo salar clone ssal-rgf-507-047 Methyl-CpG-binding domain protein 3 putative mRNA complete cds	-1.217	0.000497	MBD3		MBD3	-1.217	methyl-CpG binding domain protein 3	Nucleus	other
	TC140283	NM_001124510	Oncorhynchus mykiss valosin containing protein (LOC100136246) mRNA_x0001_gb-AY606032.1- Oncorhynchus mykiss valosin containing protein mRNA complete cds	-1.217	0.041536	VCP		VCP	-1.217	valosin containing protein	Cytoplasm	enzyme
	TC140304	BT125135	Salmo salar clone ssal-eve-533-265 Carbonic anhydrase 12 precursor putative mRNA complete cds	-1.219	0.000296	CA12		CA12	-1.219	carbonic anhydrase 12	Plasma Membrane	enzyme
	CUST_12_PI425348775	NP_001233270	Oncorhynchus mykiss interleukin 4/13A	-1.22	0.001918	IL4		IL4	-1.22	interleukin 4	Extracellular Space	cytokine
	TC156593	FQ310506	Dicentrarchus labrax chromosome sequence corresponding to linkage group 1 top part complete sequence	-1.221	7.1e-05	AP5B1		AP5B1	-1.221	adaptor related protein complex 5 subunit beta 1	Cytoplasm	other
	TC155714	not-annotated	not-annotated	-1.221	0.02941	KIAA1731		CEP295	-1.221	centrosomal protein 295	Cytoplasm	other
	TC160471	NM_001139844	Salmo salar bone morphogenetic protein 4 (bmp4) mRNA_x0001_gb-BT044754.1- Salmo salar clone ssal-rgf-502-254 Bone morphogenetic protein 4 precursor putative mRNA complete cds	-1.223	0.001406	BMP4		BMP4	-1.223	bone morphogenetic protein 4	Extracellular Space	growth factor
	TC139221	BT059778	Salmo salar clone ssal-rgf-516-209 Vacuolar protein sorting-associated protein 26B-B putative mRNA complete cds	-1.223	0.029985	VPS26B		VPS26B	-1.223	VPS26, retromer complex component B	Cytoplasm	transporter
	TC164758	NM_001141701	Salmo salar general transcription factor IIE polypeptide 2-2 (LOC100196672) mRNA_x0001_gb-BT043828.1- Salmo salar clone HM5_1779 general transcription factor IIE polypeptide 2-2 mRNA complete cds	-1.224	0.000215	GTF2H2		GTF2H2	-1.224	general transcription factor IIH subunit 2	Nucleus	transcription regulator
	TC140624	NM_001173599	Salmo salar lon peptidase 2 peroxisomal (lonp2) mRNA_x0001_gb-BT059019.1- Salmo salar clone ssal-rgf-520-244 Peroxisomal Lon protease homolog 2 putative mRNA complete cds	-1.224	8.9e-05	LONP2		LONP2	-1.224	lon peptidase 2, peroxisomal	Cytoplasm	peptidase
	TC162070	BT045211	Salmo salar clone ssal-rgf-514-371 RCC2 homolog putative mRNA complete cds	-1.224	0.00361	RCC2		RCC2	-1.224	regulator of chromosome condensation 2	Nucleus	other
	TC151675	NM_001140409	Salmo salar F-box only protein 37 (fbx37) mRNA_x0001_gb-BT045810.1- Salmo salar clone ssal-rgf-532-002 F-box only protein 37 putative mRNA complete cds	-1.226	0.000121	FBXL15		FBXL15	-1.226	F-box and leucine rich repeat protein 15	Cytoplasm	other
	TC132381	NM_001124542	Oncorhynchus mykiss LCK2 (LOC100136288) mRNA_x0001_gb-AY973033.1- Oncorhynchus mykiss LCK2 mRNA complete cds	-1.227	0.000181	LCK		LCK	-1.227	LCK proto-oncogene, Src family tyrosine kinase	Cytoplasm	kinase
	TC154472	NM_001129986	Oncorhynchus mykiss type II keratin E3 (e3) mRNA_x0001_emb-AJ315933.1- Oncorhynchus mykiss mRNA for type II keratin E3 (E3 gene)	-1.229	0.001311	KRT8		KRT8	-1.229	keratin 8	Cytoplasm	other
	TC155855	not-annotated	not-annotated	-1.229	0.001957	TRIM14		TRIM14	-1.229	tripartite motif containing 14	Cytoplasm	other
	TC137041	BT046558	Salmo salar clone ssal-eve-522-003 Tetraspanin-13 putative mRNA complete cds	-1.236	0.000203	TSPAN13		TSPAN13	-1.236	tetraspanin 13	Plasma Membrane	other
	TC159229	AL929389	Zebrafish DNA sequence from clone CH211-51H4 in linkage group 11 Contains the 3' end of the gene for a novel protein similar to vertebrate transducin (beta)-like 1X-linked receptor 1 (TBL1XR1 zgc:110312) and three CpG islands complete sequence	-1.239	9.9e-05	TBL1XR1		TBL1XR1	-1.239	TBL1X receptor 1	Nucleus	transcription regulator
	TC139579	NM_001124565	Oncorhynchus mykiss TNF superfamily member 10-like protein (LOC100136317) mRNA_x0001_gb-DQ218468.1- Oncorhynchus mykiss TNF superfamily member 10-like protein mRNA complete cds	-1.244	4.3e-05	TNFSF10		TNFSF10	-1.244	TNF superfamily member 10	Extracellular Space	cytokine
	TC139235	NM_001173562	Salmo salar Decorin (pgs2) mRNA_x0001_gb-BT045954.1- Salmo salar clone ssal-rgf-537-242 Decorin precursor putative mRNA complete cds	-1.246	0.000163	DCN		DCN	-1.246	decorin	Extracellular Space	other
	TC164229	BT072123	Salmo salar clone ssal-rgf-512-240 Trifunctional enzyme subunit alpha mitochondrial precursor putative mRNA partial cds	-1.246	0.033074	HADHA		HADHA	-1.246	hydroxyacyl-CoA dehydrogenase trifunctional multienzyme complex subunit alpha	Cytoplasm	enzyme
	TC148181	NM_001139786	Salmo salar Globoside alpha-13-N-acetylgalactosaminyltransferase 1 (gbgt1) mRNA_x0001_gb-BT044652.1- Salmo salar clone ssal-rgf-001-381 Globoside alpha-13-N-acetylgalactosaminyltransferase 1 putative mRNA complete cds	-1.247	0.043033	GBGT1		GBGT1	-1.247	globoside alpha-1,3-N-acetylgalactosaminyltransferase 1 (FORS blood group)	Other	enzyme
	TC144878	NM_001141529	Salmo salar PHS1 protein (phs1) mRNA_x0001_gb-BT050020.1- Salmo salar clone ssal-plnb-029-159 PHS1 putative mRNA complete cds	-1.249	0.001803	PTPLB		HACD2	-1.249	3-hydroxyacyl-CoA dehydratase 2	Cytoplasm	phosphatase
	TC156423	BT075466	Osmerus mordax clone omor-eva-514-105 Sorting nexin-24 putative mRNA complete cds	-1.249	0.001909	SNX24		SNX24	-1.249	sorting nexin 24	Other	transporter
	TC154415	not-annotated	not-annotated	-1.251	0.01649	PIK3AP1		PIK3AP1	-1.251	phosphoinositide-3-kinase adaptor protein 1	Cytoplasm	other
	TC156926	BC129310	Danio rerio TAF5 RNA polymerase II TATA box binding protein (TBP)-associated factor mRNA (cDNA clone MGC:158587 IMAGE:7890742) complete cds	-1.251	0.000248	TAF5		TAF5	-1.251	TATA-box binding protein associated factor 5	Nucleus	transcription regulator
	TC148553	NM_001141169	Salmo salar Phosphatidylinositol-specific phospholipase C X domain-containing protein 1 (plcx1) mRNA_x0001_gb-BT048509.2- Salmo salar clone ssal-evf-548-138 Phosphatidylinositol-specific phospholipase C X domain-containing protein 1 putative mRNA complete cds	-1.253	0.000774	PLCXD1		PLCXD1	-1.253	phosphatidylinositol specific phospholipase C X domain containing 1	Other	enzyme
	TC133687	NM_001124742	Oncorhynchus mykiss cytochrome P450 2K5 (cyp2k5) mRNA_x0001_gb-AF151524.1-AF151524 Oncorhynchus mykiss cytochrome P450 2K5 (CYP2K5) mRNA complete cds	-1.254	0.016807	CYP2F1		CYP2F1	-1.254	cytochrome P450 family 2 subfamily F member 1	Cytoplasm	enzyme
	TC134110	NM_001141881	Salmo salar Dual specificity protein phosphatase 18 (dus18) mRNA_x0001_gb-BT048836.1- Salmo salar clone ssal-rgb2-593-267 Dual specificity protein phosphatase 18 putative mRNA complete cds	-1.256	0.024629	DUSP18		DUSP18	-1.256	dual specificity phosphatase 18	Cytoplasm	phosphatase
	TC163013	NM_001141703	Salmo salar pyruvate kinase (pk) mRNA_x0001_gb-BT043851.1- Salmo salar clone HM4_3957 pyruvate kinase (pk) mRNA complete cds	-1.256	0.025578	PKM2		PKM	-1.256	pyruvate kinase M1/2	Cytoplasm	kinase
	TC149768	not-annotated	not-annotated	-1.26	0.032331	ZWINT		ZWINT	-1.26	ZW10 interacting kinetochore protein	Nucleus	other
	TC152972	BT044697	Salmo salar clone ssal-rgf-501-026 Agmatinase mitochondrial precursor putative mRNA complete cds	-1.263	0.010521	AGMAT		AGMAT	-1.263	agmatinase	Cytoplasm	enzyme
	TC137872	XM_003273170	PREDICTED: Nomascus leucogenys NUAK family SNF1-like kinase 2 (NUAK2) mRNA	-1.269	0.022067	NUAK2		NUAK2	-1.269	NUAK family kinase 2	Nucleus	kinase
	TC154252	BT045754	Salmo salar clone ssal-rgf-530-196 tRNA selenocysteine-associated protein 1 putative mRNA complete cds	-1.27	0.00197	TRNAU1AP		TRNAU1AP	-1.27	tRNA selenocysteine 1 associated protein 1	Nucleus	other
	TC141416	BC154420	Danio rerio zgc:171230 mRNA (cDNA clone MGC:171230 IMAGE:7285768) complete cds	-1.276	0.033014	SENP6		SENP6	-1.276	SUMO specific peptidase 6	Cytoplasm	peptidase
	TC136494	BC115082	Danio rerio zgc:136320 mRNA (cDNA clone MGC:136320 IMAGE:7293161) complete cds	-1.277	0.048481	SYCE2		SYCE2	-1.277	synaptonemal complex central element protein 2	Nucleus	other
	TC149668	BT028525	Gasterosteus aculeatus clone CNB236-F11 mRNA sequence	-1.279	2e-05	ANKH		ANKH	-1.279	ANKH inorganic pyrophosphate transport regulator	Plasma Membrane	transporter
	TC137798	BT049934	Salmo salar clone ssal-evf-564-190 Aspartoacylase-2 putative mRNA complete cds	-1.28	0.001666	ACY3		ACY3	-1.28	aminoacylase 3	Cytoplasm	enzyme
	TC156795	not-annotated	not-annotated	-1.282	0.005209	GBA3		GBA3	-1.282	glucosylceramidase beta 3 (gene/pseudogene)	Cytoplasm	enzyme
	TC149882	not-annotated	not-annotated	-1.283	0.004905	C3orf17		NEPRO	-1.283	nucleolus and neural progenitor protein	Nucleus	other
	TC133367	NM_001165362	Salmo salar CT004 protein (ct004) mRNA_x0001_gb-BT058866.1- Salmo salar clone ssal-rgf-509-025 C20orf4 homolog putative mRNA complete cds	-1.288	0.003386	AAR2		AAR2	-1.288	AAR2 splicing factor	Other	other
	TC134077	not-annotated	not-annotated	-1.294	3.4e-05	SETDB2		SETDB2	-1.294	SET domain bifurcated histone lysine methyltransferase 2	Nucleus	enzyme
	TC147125	BT045176	Salmo salar clone ssal-rgf-514-074 Arrestin domain-containing protein 2 putative mRNA complete cds	-1.298	0.024064	ARRDC2		ARRDC2	-1.298	arrestin domain containing 2	Other	other
	TC137733	BT048481	Salmo salar clone ssal-eve-502-355 Trafficking protein particle complex subunit 5 putative mRNA complete cds	-1.299	0.000517	TRIM23		TRIM23	-1.299	tripartite motif containing 23	Nucleus	enzyme
	TC151177	NM_001139784	Salmo salar Coiled-coil domain-containing protein 82 (ccd82) mRNA_x0001_gb-BT044650.1- Salmo salar clone ssal-rgf-001-370 Coiled-coil domain-containing protein 82 putative mRNA complete cds	-1.301	0.000937	CCDC82		CCDC82	-1.301	coiled-coil domain containing 82	Other	other
	TC171172	NM_001165075	Oncorhynchus mykiss Proteasome subunit beta type 4 (psb4) mRNA_x0001_gb-BT073805.1- Oncorhynchus mykiss clone omyk-evo-502-172 Proteasome subunit beta type 4 precursor putative mRNA complete cds	-1.303	0.045877	PSMB4		PSMB4	-1.303	proteasome 20S subunit beta 4	Cytoplasm	peptidase
	TC155331	not-annotated	not-annotated	-1.306	0.032588	FCRL6		FCRL6	-1.306	Fc receptor like 6	Plasma Membrane	other
	TC156028	NM_001140147	Salmo salar methylthioadenosine phosphorylase (mtap) mRNA_x0001_gb-BT045324.1- Salmo salar clone ssal-rgf-518-163 S-methyl-5-thioadenosine phosphorylase putative mRNA complete cds	-1.309	1.9e-05	MTAP		MTAP	-1.309	methylthioadenosine phosphorylase	Nucleus	enzyme
	TC152426	BT058830	Salmo salar clone ssal-rgf-506-016 Coproporphyrinogen III oxidase mitochondrial precursor putative mRNA complete cds	-1.31	0.015635	CPOX		CPOX	-1.31	coproporphyrinogen oxidase	Cytoplasm	enzyme
	TC139105	CR666673	Tetraodon nigroviridis full-length cDNA	-1.312	0.00012	ATXN7L3		ATXN7L3	-1.312	ataxin 7 like 3	Nucleus	transcription regulator
	TC135370	NM_001139969	Salmo salar N-acetyltransferase ESCO1 (esco1) mRNA_x0001_gb-BT044980.1- Salmo salar clone ssal-rgf-508-366 N-acetyltransferase ESCO1 putative mRNA complete cds	-1.316	0.000282	ESCO1		ESCO1	-1.316	establishment of sister chromatid cohesion N-acetyltransferase 1	Nucleus	enzyme
	TC160543	BC162582	Danio rerio DNA (cytosine-5-)-methyltransferase 6 mRNA (cDNA clone MGC:193836 IMAGE:9038105) complete cds	-1.32	0.018435	DNMT3A		DNMT3A	-1.32	DNA methyltransferase 3 alpha	Nucleus	enzyme
	TC168014	XM_003199173	PREDICTED: Danio rerio kalirin-like (LOC100148988) mRNA	-1.326	0.002898	KALRN		KALRN	-1.326	kalirin RhoGEF kinase	Cytoplasm	kinase
	TC140247	DQ356892	Danio rerio cell division cycle 16 (cdc16) mRNA complete cds	-1.327	0.013064	CDC16		CDC16	-1.327	cell division cycle 16	Nucleus	other
	TC135063	BT072311	Salmo salar clone ssal-rgf-520-328 ADP-ribosylation factor-binding protein GGA1 putative mRNA partial cds	-1.327	6.2e-05	GGA1		GGA1	-1.327	golgi associated, gamma adaptin ear containing, ARF binding protein 1	Cytoplasm	transporter
	TC161156	DQ858215	Danio rerio sestrin 1 (sesn1) mRNA complete cds	-1.327	9.8e-05	SESN1		SESN1	-1.327	sestrin 1	Nucleus	other
	TC141732	NM_001140025	Salmo salar TM2 domain-containing protein 2 (tm2d2) mRNA_x0001_gb-BT045089.1- Salmo salar clone ssal-rgf-511-290 TM2 domain-containing protein 2 precursor putative mRNA complete cds	-1.331	0.00308	TM2D2		TM2D2	-1.331	TM2 domain containing 2	Extracellular Space	other
	TC160815	not-annotated	not-annotated	-1.335	0.001815	CLEC17A		CLEC17A	-1.335	C-type lectin domain containing 17A	Plasma Membrane	other
	TC138266	XM_003203151	PREDICTED: Meleagris gallopavo ubiquitin protein ligase E3A (UBE3A) mRNA	-1.337	0.045184	UBE3A		UBE3A	-1.337	ubiquitin protein ligase E3A	Nucleus	enzyme
	TC158127	NM_001173673	Salmo salar Tyrosine-protein kinase SYK (ksyk) mRNA_x0001_gb-BT059215.1- Salmo salar clone ssal-rgf-532-381 Tyrosine-protein kinase SYK putative mRNA complete cds	-1.342	0.003737	SYK		SYK	-1.342	spleen associated tyrosine kinase	Cytoplasm	kinase
	TC172490	NM_001139899	Salmo salar Tripartite motif-containing protein 13 (tri13) mRNA_x0001_gb-BT044841.1- Salmo salar clone ssal-rgf-505-154 Tripartite motif-containing protein 13 putative mRNA complete cds	-1.343	0.00021	TRIM13		TRIM13	-1.343	tripartite motif containing 13	Cytoplasm	enzyme
	TC162546	BC165844	Danio rerio abhydrolase domain containing 2b mRNA (cDNA clone MGC:192932 IMAGE:100061418) complete cds	-1.345	0.027991	ABHD2		ABHD2	-1.345	abhydrolase domain containing 2, acylglycerol lipase	Cytoplasm	enzyme
	TC133323	XM_001516478	PREDICTED: Ornithorhynchus anatinus hypothetical protein LOC100086396 (LOC100086396) partial mRNA	-1.349	8e-06	GNB1L		GNB1L	-1.349	G protein subunit beta 1 like	Cytoplasm	other
	TC141545	BT049713	Salmo salar clone ssal-evd-546-257 Hemagglutinin/amebocyte aggregation factor precursor putative mRNA complete cds	-1.353	0.024949	DPT		DPT	-1.353	dermatopontin	Extracellular Space	other
	TC163864	BT072107	Salmo salar clone ssal-rgf-512-013 unknown large open reading frame mRNA novel cds	-1.357	0.011315	KIAA1191		KIAA1191	-1.357	KIAA1191	Cytoplasm	other
	TC137675	NM_001146598	Salmo salar U6 snRNA-associated Sm-like protein LSm2 (lsm2) mRNA_x0001_gb-BT057625.1- Salmo salar clone ssal-plnb-027-076 U6 snRNA-associated Sm-like protein LSm2 putative mRNA complete cds	-1.361	0.04712	LSM2		LSM2	-1.361	LSM2 homolog, U6 small nuclear RNA and mRNA degradation associated	Nucleus	other
	TC142757	NM_001077316	Danio rerio zgc:153051 (zgc:153051) mRNA_x0001_gb-BC124629.1- Danio rerio zgc:153051 mRNA (cDNA clone MGC:153051 IMAGE:7222484) complete cds	-1.361	9.7e-05	NUDT8		NUDT8	-1.361	nudix hydrolase 8	Cytoplasm	other
	TC151762	BT044777	Salmo salar clone ssal-rgf-503-164 Oocyte zinc finger protein XlCOF20 putative mRNA complete cds	-1.362	0.010057	ZNF235		ZNF235	-1.362	zinc finger protein 235	Nucleus	transcription regulator
	TC160665	BT072714	Salmo salar clone ssal-rgf-537-266 unknown large open reading frame mRNA novel cds	-1.364	3.2e-05	C7orf57		C7orf57	-1.364	chromosome 7 open reading frame 57	Other	other
	TC145379	not-annotated	not-annotated	-1.365	0.007205	MFSD6L		MFSD6L	-1.365	major facilitator superfamily domain containing 6 like	Other	other
	TC158439	BT059350	Salmo salar clone ssal-rgf-503-294 Bromodomain-containing protein 7 putative mRNA complete cds	-1.367	5.4e-05	BRD7		BRD7	-1.367	bromodomain containing 7	Nucleus	transcription regulator
	TC167077	not-annotated	not-annotated	-1.369	0.000276	IFI44L		IFI44L	-1.369	interferon induced protein 44 like	Nucleus	other
	TC144657	CR653460	Tetraodon nigroviridis full-length cDNA	-1.37	1.5e-05	MYLK		MYLK	-1.37	myosin light chain kinase	Cytoplasm	kinase
	TC132995	BT048743	Salmo salar clone ssal-evf-554-032 Tetratricopeptide repeat protein 9C putative mRNA complete cds	-1.37	0.00443	TTC9C		TTC9C	-1.37	tetratricopeptide repeat domain 9C	Other	other
	TC166285	FQ310508	Dicentrarchus labrax chromosome sequence corresponding to linkage group 18 complete sequence	-1.373	0.043234	CHPF2		CHPF2	-1.373	chondroitin polymerizing factor 2	Cytoplasm	enzyme
	TC155948	NM_001140515	Salmo salar G1/S-specific cyclin-D2 (ccnd2) mRNA_x0001_gb-BT046005.1- Salmo salar clone ssal-rgf-538-368 G1/S-specific cyclin-D2 putative mRNA complete cds	-1.375	1.9e-05	CCND2		CCND2	-1.375	cyclin D2	Nucleus	other
	TC166499	BT072345	Salmo salar clone ssal-rgf-522-072 Peroxisomal membrane protein PMP34 putative mRNA pseudogene cds	-1.375	3.8e-05	SLC25A17		SLC25A17	-1.375	solute carrier family 25 member 17	Cytoplasm	transporter
	TC144946	BT072769	Salmo salar clone ssal-rgf-539-342 Histone-lysine N-methyltransferase H3 lysine-9 specific 3 putative mRNA partial cds	-1.378	1.1e-05	EHMT2		EHMT2	-1.378	euchromatic histone lysine methyltransferase 2	Nucleus	transcription regulator
	TC169932	BT071863	Salmo salar clone ssal-rgf-501-037 C17orf37 homolog putative mRNA pseudogene cds	-1.381	0.000344	MIEN1		MIEN1	-1.381	migration and invasion enhancer 1	Cytoplasm	other
	TC138975	NM_001146615	Salmo salar DnaJ homolog subfamily C member 17 (djc17) mRNA_x0001_gb-BT057741.1- Salmo salar clone ssal-rgb2-598-029 DnaJ homolog subfamily C member 17 putative mRNA complete cds	-1.385	0.024643	DNAJC17		DNAJC17	-1.385	DnaJ heat shock protein family (Hsp40) member C17	Other	other
	TC149707	NM_001140325	Salmo salar Dr1 (nc2b) mRNA_x0001_gb-BT045654.1- Salmo salar clone ssal-rgf-527-366 Dr1 putative mRNA complete cds	-1.386	0.007746	MAT2B		MAT2B	-1.386	methionine adenosyltransferase 2B	Cytoplasm	enzyme
	TC133715	not-annotated	not-annotated	-1.401	8e-06	TST		TST	-1.401	thiosulfate sulfurtransferase	Cytoplasm	enzyme
	TC162147	BT079133	Esox lucius clone eluc-evq-506-305 Chloride intracellular channel protein 4 putative mRNA complete cds	-1.404	0.001931	CLIC4		CLIC4	-1.404	chloride intracellular channel 4	Plasma Membrane	ion channel
	TC150951	NM_200492	Danio rerio transmembrane protein 68 (tmem68) mRNA_x0001_gb-BC055249.1- Danio rerio transmembrane protein 68 mRNA (cDNA clone MGC:63809 IMAGE:3815571) complete cds	-1.406	0.001359	TMEM68		TMEM68	-1.406	transmembrane protein 68	Other	other
	TC147080	BT049679	Salmo salar clone ssal-evd-529-297 Anterior gradient protein 3 homolog precursor putative mRNA complete cds	-1.409	2.9e-05	AGR3		AGR3	-1.409	anterior gradient 3, protein disulphide isomerase family member	Extracellular Space	other
	TC158969	not-annotated	not-annotated	-1.409	0.017582	ZNF737		ZNF737	-1.409	zinc finger protein 737	Other	other
	TC152981	BC157531	Xenopus tropicalis hypothetical protein LOC100135255 mRNA (cDNA clone MGC:180647 IMAGE:8855360) complete cds	-1.413	0.001097	Nsg2		-	-1.413	-	-	-
	TC171179	BT045602	Salmo salar clone ssal-rgf-526-084 Pyridoxal kinase putative mRNA complete cds	-1.418	0.007551	PDXK		PDXK	-1.418	pyridoxal kinase	Cytoplasm	kinase
	TC152286	not-annotated	not-annotated	-1.421	0.018472	LRRC49		LRRC49	-1.421	leucine rich repeat containing 49	Cytoplasm	other
	IMM 392	AJ131019	Fugu rubripes SCL gene locus	-1.421	0.018317	TAL1		TAL1	-1.421	TAL bHLH transcription factor 1, erythroid differentiation factor	Nucleus	transcription regulator
	TC169497	CR933672	Homo sapiens mRNA; cDNA DKFZp781N0678 (from clone DKFZp781N0678)	-1.427	0.045198	IMPDH1		IMPDH1	-1.427	inosine monophosphate dehydrogenase 1	Cytoplasm	enzyme
	TC157953	FQ310506	Dicentrarchus labrax chromosome sequence corresponding to linkage group 1 top part complete sequence	-1.436	0.031643	EIF4G3		EIF4G3	-1.436	eukaryotic translation initiation factor 4 gamma 3	Cytoplasm	translation regulator
	TC135197	NM_205603	Danio rerio zgc:100846 (zgc:100846) mRNA_x0001_gb-AY394927.1- Danio rerio clone RK005A2H10 hypothetical protein MGC23980 mRNA complete cds	-1.438	0.002217	C9orf72		C9orf72	-1.438	C9orf72-SMCR8 complex subunit	Cytoplasm	other
	TC162021	NM_001141569	Salmo salar Kunitz-type protease inhibitor 1 (spit1) mRNA_x0001_gb-BT050172.1- Salmo salar clone ssal-eve-516-200 Kunitz-type protease inhibitor 1 precursor putative mRNA complete cds	-1.439	0.00859	SPINT1		SPINT1	-1.439	serine peptidase inhibitor, Kunitz type 1	Extracellular Space	other
	TC140118	BT059903	Salmo salar clone ssal-rgg-508-285 60S acidic ribosomal protein P0 putative mRNA complete cds	-1.44	0.004367	RPLP0		RPLP0	-1.44	ribosomal protein lateral stalk subunit P0	Cytoplasm	other
	TC167390	DQ156150	Salmo salar BAC S0188I22 partial sequence	-1.443	0.02014	DLL3		DLL3	-1.443	delta like canonical Notch ligand 3	Extracellular Space	other
	IMM 289	NM_001195412	Oncorhynchus mykiss DEC-205/CD205 (ly75) mRNA_x0001_gb-GQ468309.1- Oncorhynchus mykiss DEC-205/CD205 protein mRNA complete cds	-1.45	0.041705	LY75		LY75	-1.45	lymphocyte antigen 75	Plasma Membrane	cell surface receptor
	TC146270	NM_001141777	Salmo salar ectonucleotide pyrophosphatase/phosphodiesterase 4 (enpp4) mRNA_x0001_gb-BT045608.1- Salmo salar clone ssal-rgf-526-153 Ectonucleotide pyrophosphatase/phosphodiesterase family member 4 precursor putative mRNA complete cds	-1.455	0.013176	ENPP4		ENPP4	-1.455	ectonucleotide pyrophosphatase/phosphodiesterase 4	Cytoplasm	enzyme
	TC141668	BT072646	Salmo salar clone ssal-rgf-534-261 BNIP2 motif-containing molecule at the C-terminal region 1 putative mRNA pseudogene cds	-1.455	0.041854	PRUNE2		PRUNE2	-1.455	prune homolog 2 with BCH domain	Cytoplasm	other
	TC146641	FQ310506	Dicentrarchus labrax chromosome sequence corresponding to linkage group 1 top part complete sequence	-1.459	0.019779	MSX1		MSX1	-1.459	msh homeobox 1	Nucleus	transcription regulator
	TC163482	BT026799	Gasterosteus aculeatus clone CFW50-G09 mRNA sequence	-1.46	0.008746	PAPSS2		PAPSS2	-1.46	3'-phosphoadenosine 5'-phosphosulfate synthase 2	Cytoplasm	enzyme
	TC164210	DQ789362	Oncorhynchus mykiss nonclassical MHC class I antigen (Onmy-LAA) gene Onmy-LAA*0101 allele complete cds	-1.46	0.005503	ZNF577		ZNF577	-1.46	zinc finger protein 577	Other	other
	TC144425	FQ310508	Dicentrarchus labrax chromosome sequence corresponding to linkage group 18 complete sequence	-1.466	0.034412	FASN		FASN	-1.466	fatty acid synthase	Cytoplasm	enzyme
	TC169944	HM159473	Salmo salar clone BAC 19C14 DOT1-like histone H3 methyltransferase pseudogene complete sequence; anti-mullerian hormone gene complete cds; ornithine decarboxylase antizyme 1 pseudogene complete sequence; oogenesis-related protein gene complete cds; and nuclear factor interleukin 3 regulated pseudogene complete sequence	-1.466	3.3e-05	MOSPD2		MOSPD2	-1.466	motile sperm domain containing 2	Plasma Membrane	other
	TC140743	not-annotated	not-annotated	-1.466	0.02206	UMODL1		UMODL1	-1.466	uromodulin like 1	Cytoplasm	other
	TC138671	BT028239	Gasterosteus aculeatus clone CNB167-A05 mRNA sequence	-1.467	0.041411	CACNG1		CACNG1	-1.467	calcium voltage-gated channel auxiliary subunit gamma 1	Plasma Membrane	ion channel
	TC154198	not-annotated	not-annotated	-1.469	0.001639	NEK1		NEK1	-1.469	NIMA related kinase 1	Nucleus	kinase
	TC166457	XM_001512727	PREDICTED: Ornithorhynchus anatinus similar to synaptotagmin-like protein 2-a delta 2S-III (LOC100082078) mRNA	-1.47	0.002014	SYTL2		SYTL2	-1.47	synaptotagmin like 2	Cytoplasm	other
	TC135408	BT072077	Salmo salar clone ssal-rgf-510-219 kinase C eta type putative mRNA partial cds	-1.474	2.2e-05	PRKCH		PRKCH	-1.474	protein kinase C eta	Cytoplasm	kinase
	TC134428	not-annotated	not-annotated	-1.479	8e-06	TRIM69		TRIM69	-1.479	tripartite motif containing 69	Nucleus	enzyme
	TC133028	NM_001165385	Salmo salar Macrosialin (cd68) mRNA_x0001_gb-BT058906.1- Salmo salar clone ssal-rgf-512-220 Macrosialin precursor putative mRNA complete cds	-1.484	0.016756	CD68		CD68	-1.484	CD68 molecule	Plasma Membrane	other
	TC163790	BC165458	Danio rerio fumarylacetoacetate hydrolase (fumarylacetoacetase) mRNA (cDNA clone MGC:192546 IMAGE:100061002) complete cds	-1.485	0.008618	FAH		FAH	-1.485	fumarylacetoacetate hydrolase	Cytoplasm	enzyme
	TC143827	BT074820	Osmerus mordax clone omor-rgc-507-007 Ras-related protein Rab-4A putative mRNA complete cds	-1.485	0.022417	RAB4A		RAB4A	-1.485	RAB4A, member RAS oncogene family	Cytoplasm	enzyme
	TC141959	not-annotated	not-annotated	-1.488	0.021647	SERPINA1		SERPINA1	-1.488	serpin family A member 1	Extracellular Space	other
	TC147492	not-annotated	not-annotated	-1.497	2.3e-05	GPR111		ADGRF2	-1.497	adhesion G protein-coupled receptor F2	Plasma Membrane	G-protein coupled receptor
	TC139299	BT072590	Salmo salar clone ssal-rgf-531-272 Oocyte zinc finger protein XlCOF22 putative mRNA pseudogene cds	-1.501	7e-06	ZNF205		ZNF205	-1.501	zinc finger protein 205	Nucleus	transcription regulator
	TC165411	XM_003201463	PREDICTED: Danio rerio forkhead box protein B1-like transcript variant 2 (LOC100535158) mRNA	-1.506	0.039087	FOXB1		FOXB1	-1.506	forkhead box B1	Nucleus	transcription regulator
	TC157804	BT072352	Salmo salar clone ssal-rgf-522-155 Acylamino-acid-releasing enzyme putative mRNA pseudogene cds	-1.513	0.023323	APEH		APEH	-1.513	acylaminoacyl-peptide hydrolase	Cytoplasm	peptidase
	TC155195	not-annotated	not-annotated	-1.514	0.012433	TRIM28		TRIM28	-1.514	tripartite motif containing 28	Nucleus	transcription regulator
	TC166486	XM_683292	PREDICTED: Danio rerio wu:fe11c03 transcript variant 1 (wu:fe11c03) mRNA	-1.517	0.001813	GRAMD1C		GRAMD1C	-1.517	GRAM domain containing 1C	Other	other
	TC136555	BT048172	Salmo salar clone ssal-sjb-009-295 C6orf130 homolog putative mRNA complete cds	-1.518	0.000235	OARD1		OARD1	-1.518	O-acyl-ADP-ribose deacylase 1	Nucleus	enzyme
	TC171920	NM_001185053	Oncorhynchus mykiss transient receptor potential cation channel subfamily C member 1 (trpc1) mRNA_x0001_gb-GQ366701.1- Oncorhynchus mykiss transient receptor potential cation channel subfamily C member 1 (TRPC1) mRNA complete cds	-1.522	0.047531	TRPC1		TRPC1	-1.522	transient receptor potential cation channel subfamily C member 1	Plasma Membrane	ion channel
	TC163884	not-annotated	not-annotated	-1.527	0.000498	ZNF140		ZNF140	-1.527	zinc finger protein 140	Nucleus	transcription regulator
	TC162552	AY883999	Oncorhynchus mykiss Toll-like receptor 3 gene promoter region and complete cds	-1.532	0.000176	RNH1		RNH1	-1.532	ribonuclease/angiogenin inhibitor 1	Cytoplasm	other
	TC138004	NM_001141048	Salmo salar heterogeneous nuclear ribonucleoprotein L (hnrpl) mRNA_x0001_gb-BT048062.1- Salmo salar clone ssal-eve-541-145 Heterogeneous nuclear ribonucleoprotein L putative mRNA complete cds	-1.535	0.000533	DENND3		DENND3	-1.535	DENN domain containing 3	Cytoplasm	other
	TC171883	not-annotated	not-annotated	-1.535	0.001232	RGAG1		RTL9	-1.535	retrotransposon Gag like 9	Other	other
	TC146182	BT045367	Salmo salar clone ssal-rgf-519-181 Thrombopoietin receptor precursor putative mRNA complete cds	-1.538	0.035276	MPL		MPL	-1.538	MPL proto-oncogene, thrombopoietin receptor	Plasma Membrane	cell surface receptor
	TC144363	U97329	Makaira nigricans ryanodine receptor RyR1 isoform (RyR1) mRNA complete cds	-1.539	0.035289	RYR1		RYR1	-1.539	ryanodine receptor 1	Cytoplasm	ion channel
	TC165617	BT059094	Salmo salar clone ssal-rgf-525-073 ATP-dependent Clp protease ATP-binding subunit clpX-like mitochondrial precursor putative mRNA complete cds	-1.541	0.001685	CLPX		CLPX	-1.541	caseinolytic mitochondrial matrix peptidase chaperone subunit X	Cytoplasm	enzyme
	TC146770	not-annotated	not-annotated	-1.543	5.9e-05	ACSBG2		ACSBG2	-1.543	acyl-CoA synthetase bubblegum family member 2	Cytoplasm	enzyme
	TC137458	BT047829	Salmo salar clone ssal-evf-509-070 Cytochrome c oxidase subunit 7C mitochondrial precursor putative mRNA complete cds	-1.546	0.042414	COX7C		COX7C	-1.546	cytochrome c oxidase subunit 7C	Cytoplasm	enzyme
	TC164137	BT072088	Salmo salar clone ssal-rgf-511-021 Gelsolin precursor putative mRNA partial cds	-1.548	0.00071	SCIN		SCIN	-1.548	scinderin	Cytoplasm	other
	TC168346	BT059323	Salmo salar clone ssal-rgf-541-170 DNA polymerase subunit delta-2 putative mRNA complete cds	-1.556	0.002513	POLD2		POLD2	-1.556	DNA polymerase delta 2, accessory subunit	Nucleus	enzyme
	TC169755	NM_001124248	Oncorhynchus mykiss apolipoprotein A-I-2 (apoa-i-2) mRNA_x0001_gb-AF042219.1-AF042219 Oncorhynchus mykiss apolipoprotein A-I-2 (apoA-I-2) mRNA complete cds	-1.557	0.029341	APOA4		APOA4	-1.557	apolipoprotein A4	Extracellular Space	transporter
	TC163613	BT045471	Salmo salar clone ssal-rgf-522-152 TPR repeat-containing protein LOC90826 putative mRNA complete cds	-1.56	0.001935	PRMT10		PRMT9	-1.56	protein arginine methyltransferase 9	Cytoplasm	enzyme
	TC146772	NM_001141016	Salmo salar Eukaryotic translation elongation factor 1 epsilon-1 (mca3) mRNA_x0001_gb-BT047922.1- Salmo salar clone ssal-eve-514-260 Eukaryotic translation elongation factor 1 epsilon-1 putative mRNA complete cds	-1.569	0.040623	EEF1E1		EEF1E1	-1.569	eukaryotic translation elongation factor 1 epsilon 1	Cytoplasm	translation regulator
	TC144373	NM_001140848	Salmo salar Quinone oxidoreductase (qor) mRNA_x0001_gb-BT047246.1- Salmo salar clone ssal-rgb2-624-275 Quinone oxidoreductase putative mRNA complete cds	-1.57	0.043074	CRYZ		CRYZ	-1.57	crystallin zeta	Cytoplasm	enzyme
	TC157852	not-annotated	not-annotated	-1.571	0.039783	PCDHGC4		PCDHGC4	-1.571	protocadherin gamma subfamily C, 4	Extracellular Space	other
	TC148743	not-annotated	not-annotated	-1.571	0.045241	UBA1		UBA1	-1.571	ubiquitin like modifier activating enzyme 1	Cytoplasm	enzyme
	TC155408	BT059324	Salmo salar clone ssal-rgf-541-174 DNA replication licensing factor mcm5 putative mRNA complete cds	-1.573	0.000144	MCM5		MCM5	-1.573	minichromosome maintenance complex component 5	Nucleus	enzyme
	TC137773	CR649330	Tetraodon nigroviridis full-length cDNA	-1.578	0.0002	FAXDC2		FAXDC2	-1.578	fatty acid hydroxylase domain containing 2	Cytoplasm	other
	TC160360	BT072307	Salmo salar clone ssal-rgf-520-296 5-nucleotidase domain-containing protein 2 putative mRNA partial cds	-1.585	0.004568	NT5DC2		NT5DC2	-1.585	5'-nucleotidase domain containing 2	Cytoplasm	other
	TC151801	not-annotated	not-annotated	-1.59	0.022308	MUC7		MUC7	-1.59	mucin 7, secreted	Cytoplasm	other
	TC158747	NM_001140115	Salmo salar Ubiquitin-conjugating enzyme E2 R1 (ub2r1) mRNA_x0001_gb-BT045267.1- Salmo salar clone ssal-rgf-517-009 Ubiquitin-conjugating enzyme E2 R1 putative mRNA complete cds	-1.591	0.034357	CDC34		CDC34	-1.591	cell division cycle 34, ubiqiutin conjugating enzyme	Nucleus	enzyme
	TC151973	XR_086027	PREDICTED: Rattus norvegicus similar to TBC1 domain family member 4 (RGD1561609) miscRNA	-1.592	0.027765	TBC1D4		TBC1D4	-1.592	TBC1 domain family member 4	Cytoplasm	other
	TC166552	not-annotated	not-annotated	-1.594	0.000619	MPST		MPST	-1.594	mercaptopyruvate sulfurtransferase	Cytoplasm	enzyme
	TC160904	not-annotated	not-annotated	-1.601	4.8e-05	ZNF185		ZNF185	-1.601	zinc finger protein 185 with LIM domain	Plasma Membrane	other
	TC172497	BT059393	Salmo salar clone ssal-rgf-519-230 Pyruvate dehydrogenase E1 component subunit alpha somatic form mitochondrial precursor putative mRNA complete cds	-1.602	0.041843	PDHA1		PDHA1	-1.602	pyruvate dehydrogenase E1 subunit alpha 1	Cytoplasm	enzyme
	TC156219	BT059305	Salmo salar clone ssal-rgf-540-102 Guanine nucleotide-binding protein subunit beta-2-like 1 putative mRNA complete cds	-1.605	0.000728	GNB2L1		RACK1	-1.605	receptor for activated C kinase 1	Cytoplasm	enzyme
	TC137568	NM_001111150	Danio rerio BMS1-like ribosome assembly protein (yeast) (bms1l) mRNA	-1.609	0.026717	BMS1		BMS1	-1.609	BMS1 ribosome biogenesis factor	Nucleus	other
	TC139322	NM_001139817	Salmo salar Phenylalanyl-tRNA synthetase beta chain (syfb) mRNA_x0001_gb-BT044717.1- Salmo salar clone ssal-rgf-501-290 Phenylalanyl-tRNA synthetase beta chain putative mRNA complete cds	-1.609	2.7e-05	FARSB		FARSB	-1.609	phenylalanyl-tRNA synthetase subunit beta	Cytoplasm	enzyme
	TC140195	not-annotated	not-annotated	-1.612	0.019704	PPP1R9A		PPP1R9A	-1.612	protein phosphatase 1 regulatory subunit 9A	Plasma Membrane	other
	TC152224	BT046741	Salmo salar clone ssal-eve-570-215 Transcription factor HES-1 putative mRNA complete cds	-1.613	0.03725	HES1		HES1	-1.613	hes family bHLH transcription factor 1	Nucleus	transcription regulator
	TC142915	not-annotated	not-annotated	-1.614	0.000121	ZNF771		ZNF771	-1.614	zinc finger protein 771	Nucleus	transcription regulator
	TC148609	not-annotated	not-annotated	-1.617	1.1e-05	DTX3L		DTX3L	-1.617	deltex E3 ubiquitin ligase 3L	Cytoplasm	enzyme
	TC148500	not-annotated	not-annotated	-1.617	1.4e-05	NTF4		NTF4	-1.617	neurotrophin 4	Extracellular Space	growth factor
	TC156229	FN667596	Astatotilapia burtoni mRNA for dlx1a protein tissue type whole embryo	-1.624	5e-06	DLX1		DLX1	-1.624	distal-less homeobox 1	Nucleus	transcription regulator
	TC132543	AF318188	Oncorhynchus mykiss MHC class I heavy chain (Onmy-UBA) mRNA Onmy-UBA*4801 allele partial cds	-1.628	0.006518	HLA-C		HLA-C	-1.628	major histocompatibility complex, class I, C	Plasma Membrane	other
	TC155400	NM_001173750	Salmo salar Coronin-1C (cor1c) mRNA_x0001_gb-BT059416.1- Salmo salar clone ssal-rgf-519-381 Coronin-1C putative mRNA complete cds	-1.629	0.041705	CORO1C		CORO1C	-1.629	coronin 1C	Cytoplasm	other
	TC156396	NM_001140473	Salmo salar receptor-interacting serine-threonine kinase 4 (ripk4) mRNA_x0001_gb-BT045929.1- Salmo salar clone ssal-rgf-536-368 Receptor-interacting serine/threonine-protein kinase 4 putative mRNA complete cds	-1.629	0.03654	RIPK3		RIPK3	-1.629	receptor interacting serine/threonine kinase 3	Plasma Membrane	kinase
	TC145760	not-annotated	not-annotated	-1.635	0.010268	TYSND1		TYSND1	-1.635	trypsin domain containing 1	Cytoplasm	peptidase
	IMM 596	NM_001124744	Oncorhynchus mykiss membrane-Toll-like receptor 5 (tlr5m) mRNA_x0001_dbj-AB091105.1- Oncorhynchus mykiss tTLR5 mRNA for membrane-Toll-like receptor 5 complete cds	-1.636	0.014692	TLR5		TLR5	-1.636	toll like receptor 5	Plasma Membrane	cell surface receptor
	TC162530	NM_001200367	Ictalurus punctatus chromosome transmission fidelity protein 8-like protein (ctf8) mRNA_x0001_gb-GU588505.1- Ictalurus punctatus clone CBPN22852 chromosome transmission fidelity protein 8-like protein (CTF8) mRNA complete cds	-1.644	3.6e-05	CIRH1A		UTP4	-1.644	UTP4 small subunit processome component	Nucleus	other
	TC148618	BT071852	Salmo salar clone ssal-rgf-002-138 BCL2/adenovirus E1B 19 kDa protein-interacting protein 3-like putative mRNA pseudogene cds	-1.645	0.030584	BNIP3L		BNIP3L	-1.645	BCL2 interacting protein 3 like	Cytoplasm	other
	TC141799	not-annotated	not-annotated	-1.646	1.2e-05	GOLGA6L6		GOLGA6L6 (includes others)	-1.646	golgin A6 family like 6	Other	other
	TC149100	NM_001124662	Oncorhynchus mykiss Rhesus blood group family type B glycoprotein (rhgb) mRNA_x0001_gb-EF051113.1- Oncorhynchus mykiss RhBGa mRNA complete cds	-1.649	6e-06	RHBG		RHBG	-1.649	Rh family B glycoprotein (gene/pseudogene)	Plasma Membrane	transporter
	TC170120	NM_001124197	Oncorhynchus mykiss rhamnose binding lectin STL3 (stl3) mRNA_x0001_dbj-AB039024.3- Oncorhynchus mykiss stl3 mRNA for rhamnose binding lectin STL3 complete cds	-1.656	0.043644	PRKRIR		THAP12	-1.656	THAP domain containing 12	Nucleus	transcription regulator
	TC171916	AE005674	Shigella flexneri 2a str. 301 complete genome	-1.662	0.031253	KIAA1324L		ELAPOR2	-1.662	endosome-lysosome associated apoptosis and autophagy regulator family member 2	Plasma Membrane	other
	TC133617	NM_001141708	Salmo salar Pleckstrin homology domain-containing family B member 2 (pkhb2) mRNA_x0001_gb-BT044631.1- Salmo salar clone ssal-rgf-001-166 Pleckstrin homology domain-containing family B member 2 putative mRNA complete cds	-1.662	0.035718	PLEKHB2		PLEKHB2	-1.662	pleckstrin homology domain containing B2	Other	other
	TC157793	NM_001012388	Danio rerio discs large (Drosophila) homolog 1 like (dlg1l) mRNA_x0001_gb-AY819035.1- Danio rerio SAP-97B mRNA complete cds	-1.666	0.043793	DLG1		DLG1	-1.666	discs large MAGUK scaffold protein 1	Plasma Membrane	kinase
	TC144831	BT047871	Salmo salar clone ssal-rgb2-612-002 HD domain-containing protein 3 putative mRNA complete cds	-1.666	8.6e-05	HDDC3		HDDC3	-1.666	HD domain containing 3	Other	other
	TC164043	not-annotated	not-annotated	-1.67	0.030282	CUZD1		CUZD1	-1.67	CUB and zona pellucida like domains 1	Plasma Membrane	other
	TC160341	BT072231	Salmo salar clone ssal-rgf-517-292 unknown large open reading frame mRNA novel cds	-1.671	0.000636	C15orf61		C15orf61	-1.671	chromosome 15 open reading frame 61	Other	other
	TC157439	NM_001141098	Salmo salar arylformamidase (afmid) mRNA_x0001_gb-BT048246.2- Salmo salar clone ssal-eve-541-293 Probable arylformamidase putative mRNA complete cds	-1.682	0.045686	AFMID		AFMID	-1.682	arylformamidase	Nucleus	enzyme
	TC139323	XM_001341047	PREDICTED: Danio rerio si:ch211-241d21.5 (si:ch211-241d21.5) mRNA	-1.682	0.00556	C1orf228		ARMH1	-1.682	armadillo like helical domain containing 1	Other	other
	TC168829	not-annotated	not-annotated	-1.685	0.032178	ZP3		ZP3	-1.685	zona pellucida glycoprotein 3	Extracellular Space	other
	TC138660	HQ206591	Perca flavescens clone Pf_8722 organic solute transporter subunit alpha (Osta) mRNA partial cds	-1.696	0.030385	SLC51A		SLC51A	-1.696	solute carrier family 51 subunit alpha	Plasma Membrane	transporter
	TC140107	not-annotated	not-annotated	-1.697	0.037704	ACBD3		ACBD3	-1.697	acyl-CoA binding domain containing 3	Cytoplasm	other
	TC163043	not-annotated	not-annotated	-1.707	7.3e-05	GEMIN4		GEMIN4	-1.707	gem nuclear organelle associated protein 4	Nucleus	other
	TC170030	NM_001141030	Salmo salar Tumor necrosis factor-inducible protein TSG-6 (tsg6) mRNA_x0001_gb-BT047979.1- Salmo salar clone ssal-evd-553-270 Tumor necrosis factor-inducible protein TSG-6 precursor putative mRNA complete cds	-1.716	0.032111	TNFAIP6		TNFAIP6	-1.716	TNF alpha induced protein 6	Extracellular Space	other
	TC140233	XM_002595002	Branchiostoma floridae hypothetical protein mRNA	-1.718	0.022304	GUSB		GUSB	-1.718	glucuronidase beta	Cytoplasm	enzyme
	TC132894	BT045252	Salmo salar clone ssal-rgf-516-227 RNA-binding protein 39 putative mRNA complete cds	-1.722	0.031345	RBM39		RBM39	-1.722	RNA binding motif protein 39	Nucleus	transcription regulator
	TC138349	BT074755	Osmerus mordax clone omor-rgc-515-163 Beta-13-galactosyltransferase 2 putative mRNA complete cds	-1.724	3.1e-05	B3GALT2		B3GALT2	-1.724	beta-1,3-galactosyltransferase 2	Cytoplasm	enzyme
	TC165058	DQ307741	Hiodon alosoides voucher USNM 384559 frizzled-8 (fzd8) gene partial cds	-1.725	0.00188	FZD8		FZD8	-1.725	frizzled class receptor 8	Plasma Membrane	G-protein coupled receptor
	TC152227	NM_001141860	Salmo salar 12-dihydroxy-3-keto-5-methylthiopentene dioxygenase (mtnd) mRNA_x0001_gb-BT048022.1- Salmo salar clone ssal-evd-522-099 12-dihydroxy-3-keto-5-methylthiopentene dioxygenase putative mRNA complete cds	-1.74	0.013867	CABIN1		CABIN1	-1.74	calcineurin binding protein 1	Nucleus	other
	TC139095	NM_001146648	Salmo salar Zinc finger protein 391 (zn391) mRNA_x0001_gb-BT056386.1- Salmo salar clone ssal-eve-563-079 Zinc finger protein 391 putative mRNA complete cds	-1.743	8.3e-05	ZNF135		ZNF135	-1.743	zinc finger protein 135	Nucleus	transcription regulator
	TC145092	NM_001146373	Salmo salar Vesicle transport protein SFT2B (sft2b) mRNA_x0001_gb-BT056433.1- Salmo salar clone ssal-eve-503-347 Vesicle transport protein SFT2B putative mRNA complete cds	-1.748	1.2e-05	SFT2D2		SFT2D2	-1.748	SFT2 domain containing 2	Cytoplasm	other
	TC155477	not-annotated	not-annotated	-1.752	0.043581	PRG4		PRG4	-1.752	proteoglycan 4	Extracellular Space	other
	TC132716	NM_001124195	Oncorhynchus mykiss rhamnose binding lectin STL1 (stl1) mRNA_x0001_dbj-AB039022.1- Oncorhynchus mykiss stl1 mRNA for rhamnose binding lectin STL1 complete cds	-1.757	0.012809	EVA1C		EVA1C	-1.757	eva-1 homolog C	Other	other
	TC165698	not-annotated	not-annotated	-1.766	0.009207	PROM2		PROM2	-1.766	prominin 2	Plasma Membrane	cell surface receptor
	TC142459	not-annotated	not-annotated	-1.772	0.000113	UMOD		UMOD	-1.772	uromodulin	Extracellular Space	other
	TC158068	NM_001104692	Oryzias latipes Me-HNF3b protein (foxa2) mRNA_x0001_dbj-AB001572.2- Oryzias latipes Me-HNF3b mRNA for Me-HNF3B complete cds	-1.78	0.005829	FOXA2		FOXA2	-1.78	forkhead box A2	Nucleus	transcription regulator
	TC161681	BT047331	Salmo salar clone ssal-eve-501-132 Butyrophilin subfamily 1 member A1 precursor putative mRNA complete cds	-1.781	0.001037	BTN2A1		BTN2A1	-1.781	butyrophilin subfamily 2 member A1	Plasma Membrane	other
	TC157041	BT045933	Salmo salar clone ssal-rgf-537-027 Serine/threonine-protein kinase 17A putative mRNA complete cds	-1.781	0.014882	STK17A		STK17A	-1.781	serine/threonine kinase 17a	Nucleus	kinase
	TC150140	BT072147	Salmo salar clone ssal-rgf-513-342 Vacuolar protein sorting-associated protein 33A putative mRNA pseudogene cds	-1.789	0.00327	VPS33A		VPS33A	-1.789	VPS33A core subunit of CORVET and HOPS complexes	Cytoplasm	transporter
	TC132412	NM_001124644	Oncorhynchus mykiss carbonic anhydrase-related protein (car8) mRNA_x0001_gb-AY860422.1- Oncorhynchus mykiss carbonic anhydrase-related protein mRNA complete cds	-1.797	0.022868	CA8		CA8	-1.797	carbonic anhydrase 8	Cytoplasm	enzyme
	TC158894	not-annotated	not-annotated	-1.798	0.024038	ST6GALNAC1		ST6GALNAC1	-1.798	ST6 N-acetylgalactosaminide alpha-2,6-sialyltransferase 1	Cytoplasm	enzyme
	TC171926	NM_001141271	Salmo salar Annexin A1 (anxa1) mRNA_x0001_gb-BT048867.1- Salmo salar clone ssal-rgb2-647-115 Annexin A1 putative mRNA complete cds	-1.802	0.000457	ANXA1		ANXA1	-1.802	annexin A1	Plasma Membrane	enzyme
	TC147170	BT059605	Salmo salar clone ssal-rgf-514-178 Ubiquitin-associated domain-containing protein 2 precursor putative mRNA complete cds	-1.802	0.035159	UBAC2		UBAC2	-1.802	UBA domain containing 2	Cytoplasm	enzyme
	TC138127	BC153514	Danio rerio zgc:162327 mRNA (cDNA clone MGC:174187 IMAGE:8770825) complete cds	-1.808	0.000151	PNPLA4		PNPLA4	-1.808	patatin like phospholipase domain containing 4	Cytoplasm	enzyme
	TC152225	BT072110	Salmo salar clone ssal-rgf-512-019 Calcineurin subunit B isoform 1 putative mRNA partial cds	-1.811	0.001668	PPP3R1		PPP3R1	-1.811	protein phosphatase 3 regulatory subunit B, alpha	Cytoplasm	phosphatase
	TC156673	not-annotated	not-annotated	-1.812	5.6e-05	SULT1C4		SULT1C4	-1.812	sulfotransferase family 1C member 4	Cytoplasm	enzyme
	TC147288	NM_001141066	Salmo salar Homeobox protein koza (koza) mRNA_x0001_gb-BT048121.1- Salmo salar clone ssal-eve-552-339 Homeobox protein koza putative mRNA complete cds	-1.824	2.9e-05	NKX3-1		NKX3-1	-1.824	NK3 homeobox 1	Nucleus	transcription regulator
	TC145514	not-annotated	not-annotated	-1.827	0.000732	TMEM218		TMEM218	-1.827	transmembrane protein 218	Extracellular Space	other
	TC162369	BT048184	Salmo salar clone ssal-evf-522-280 dpy-30 homolog putative mRNA complete cds	-1.828	0.031345	DPY30		DPY30	-1.828	dpy-30 histone methyltransferase complex regulatory subunit	Nucleus	other
	TC146937	BT072419	Salmo salar clone ssal-rgf-525-016 disulfide-isomerase A4 precursor putative mRNA pseudogene cds	-1.829	0.042553	PDIA4		PDIA4	-1.829	protein disulfide isomerase family A member 4	Cytoplasm	enzyme
	TC162316	not-annotated	not-annotated	-1.831	0.012422	C16orf93		CCDC189	-1.831	coiled-coil domain containing 189	Other	other
	TC156621	BT072253	Salmo salar clone ssal-rgf-518-260 FAM134A putative mRNA partial cds	-1.839	0.000361	FAM134A		RETREG2	-1.839	reticulophagy regulator family member 2	Other	other
	TC150330	not-annotated	not-annotated	-1.839	0.01454	ZNF211		ZNF211	-1.839	zinc finger protein 211	Nucleus	transcription regulator
	TC167221	FJ969490	Salmo salar clone BAC CHORI214-439J08 MHC class I antigen (Sasa-UDA) gene Sasa-UDA*0101 allele complete cds; similar to INSD AY523662 (Sasa-UCA) pseudogene Sasa-UCA*0101 allele complete sequence; PSMB8 (PSMB8) PSMB10 (PSMB10) PSMB9b-like protein (PSMB9b-like protein) PSMB9 (PSMB9) TAP2b (TAP2b) BRD2 (BRD2) and hydroxysteroid (17-beta) dehydrogenase 8 (HSD17B8) genes complete cds; and COLLA2 gene …	-1.841	0.003331	WDR20		WDR20	-1.841	WD repeat domain 20	Nucleus	other
	TC151731	NM_001141179	Salmo salar DNA replication complex GINS protein PSF3 (psf3) mRNA_x0001_gb-BT048548.1- Salmo salar clone ssal-eve-556-064 DNA replication complex GINS protein PSF3 putative mRNA complete cds	-1.85	0.041192	GINS3		GINS3	-1.85	GINS complex subunit 3	Nucleus	other
	TC142119	BT075306	Osmerus mordax clone omor-rgc-514-333 Transcription factor Sp5 putative mRNA complete cds	-1.854	0.041053	SP5		SP5	-1.854	Sp5 transcription factor	Nucleus	transcription regulator
	TC166982	BT073152	Oncorhynchus mykiss clone omyk-evn-514-365 Hemoglobin subunit beta-4 putative mRNA complete cds	-1.866	0.04868	HBB		HBB	-1.866	hemoglobin subunit beta	Cytoplasm	transporter
	TC163655	NM_001160482	Oncorhynchus mykiss putative sodium hydrogen exchanger 3b (nhe3b) mRNA_x0001_gb-FJ376630.1- Oncorhynchus mykiss putative sodium hydrogen exchanger 3b (NHE3b) mRNA complete cds	-1.869	0.028368	SLC9A3		SLC9A3	-1.869	solute carrier family 9 member A3	Plasma Membrane	ion channel
	TC157297	not-annotated	not-annotated	-1.874	0.024554	CAPN10		CAPN10	-1.874	calpain 10	Cytoplasm	peptidase
	TC169286	NM_001165083	Oncorhynchus mykiss Guanine nucleotide-binding protein alpha-13 subunit (gna13) mRNA_x0001_gb-BT073829.1- Oncorhynchus mykiss clone omyk-evo-507-199 Guanine nucleotide-binding protein alpha-13 subunit putative mRNA complete cds	-1.88	1.3e-05	GNA13		GNA13	-1.88	G protein subunit alpha 13	Plasma Membrane	enzyme
	TC158217	NM_001141818	Salmo salar Major facilitator superfamily domain-containing protein 4 (mfsd4) mRNA_x0001_gb-BT046052.1- Salmo salar clone ssal-rgf-540-106 Major facilitator superfamily domain-containing protein 4 putative mRNA complete cds	-1.899	0.029489	MFSD4		MFSD4A	-1.899	major facilitator superfamily domain containing 4A	Other	other
	TC147603	BT058975	Salmo salar clone ssal-rgf-517-191 Transmembrane 9 superfamily member 2 precursor putative mRNA complete cds	-1.9	0.003386	TM9SF2		TM9SF2	-1.9	transmembrane 9 superfamily member 2	Plasma Membrane	transporter
	TC156216	NM_214766	Danio rerio mediator of RNA polymerase II transcription subunit 25 homolog (yeast) (med25) mRNA_x0001_gb-BC058057.1- Danio rerio mediator of RNA polymerase II transcription subunit 25 homolog (yeast) mRNA (cDNA clone MGC:63555 IMAGE:3817335) complete cds	-1.915	0.0298	MED25		MED25	-1.915	mediator complex subunit 25	Nucleus	other
	TC161801	NM_001141178	Salmo salar CS022 protein (cs022) mRNA_x0001_gb-BT048544.1- Salmo salar clone ssal-evf-543-035 C19orf22 homolog putative mRNA complete cds	-1.928	0.001867	R3HDM4		R3HDM4	-1.928	R3H domain containing 4	Other	other
	TC171792	BT072729	Salmo salar clone ssal-rgf-538-096 Autocrine motility factor receptor isoform 2 putative mRNA partial cds	-1.943	0.049138	AMFR		AMFR	-1.943	autocrine motility factor receptor	Plasma Membrane	cell surface receptor
	TC144888	NM_001141648	Salmo salar Mitogen-activated protein kinase 13 (mk13) mRNA_x0001_gb-BT045823.1- Salmo salar clone ssal-rgf-532-251 Mitogen-activated protein kinase 13 putative mRNA complete cds	-1.948	0.000129	MAPK13		MAPK13	-1.948	mitogen-activated protein kinase 13	Cytoplasm	kinase
	TC162004	EU325858	Oncorhynchus masou formosanus complement factor H1 protein (CFH) mRNA complete cds	-1.955	0.031502	F13B		F13B	-1.955	coagulation factor XIII B chain	Extracellular Space	enzyme
	TC159231	XM_682560	PREDICTED: Danio rerio glucosidase beta (bile acid) 2 (gba2) mRNA	-1.955	1e-05	GBA2		GBA2	-1.955	glucosylceramidase beta 2	Cytoplasm	enzyme
	TC143862	NM_001146480	Salmo salar NIF3-like protein 1 (nif3l) mRNA_x0001_gb-BT056978.1- Salmo salar clone ssal-eve-575-326 NIF3-like protein 1 putative mRNA complete cds	-1.964	3.7e-05	NIF3L1		NIF3L1	-1.964	NGG1 interacting factor 3 like 1	Cytoplasm	other
	TC137081	NM_001140948	Salmo salar CMRF35-like molecule 1 (clm1) mRNA_x0001_gb-BT047641.1- Salmo salar clone ssal-rgb2-658-124 CMRF35-like molecule 1 precursor putative mRNA complete cds	-1.966	0.030802	CD300LF		CD300LF	-1.966	CD300 molecule like family member f	Plasma Membrane	other
	TC158125	BT059702	Salmo salar clone ssal-rgf-002-297 DENN domain-containing protein 2D putative mRNA complete cds	-1.967	0.025233	DENND2D		DENND2D	-1.967	DENN domain containing 2D	Cytoplasm	other
	TC134183	NM_001141755	Salmo salar APEX nuclease (multifunctional DNA repair enzyme) 1 (apex1) mRNA_x0001_gb-BT045287.1- Salmo salar clone ssal-rgf-517-192 DNA-apurinic or apyrimidinic site lyase putative mRNA complete cds	-1.972	0.036166	APEX1		APEX1	-1.972	apurinic/apyrimidinic endodeoxyribonuclease 1	Nucleus	enzyme
	TC139818	not-annotated	not-annotated	-1.983	0.035435	SLC7A2		SLC7A2	-1.983	solute carrier family 7 member 2	Plasma Membrane	transporter
	IMM 822	AF281344	Oncorhynchus mykiss fatty acid binding protein mRNA partial cds	-2.002	0.035894	FABP1		FABP1	-2.002	fatty acid binding protein 1	Cytoplasm	transporter
	TC141639	not-annotated	not-annotated	-2.017	0.000484	CRISP3		CRISP3	-2.017	cysteine rich secretory protein 3	Extracellular Space	other
	TC171113	NM_001173709	Salmo salar ADP-ribosylation factor-like 15 (arl15) mRNA_x0001_gb-BT059299.1- Salmo salar clone ssal-rgf-540-027 ADP-ribosylation factor-like protein 15 putative mRNA complete cds	-2.025	6e-06	ARL15		ARL15	-2.025	ADP ribosylation factor like GTPase 15	Cytoplasm	other
	TC171139	NM_001141753	Salmo salar 1-acyl-sn-glycerol-3-phosphate acyltransferase eta (plcg) mRNA_x0001_gb-BT045266.1- Salmo salar clone ssal-rgf-516-359 1-acyl-sn-glycerol-3-phosphate acyltransferase eta putative mRNA complete cds	-2.04	0.013206	RPF2		RPF2	-2.04	ribosome production factor 2 homolog	Nucleus	other
	TC167246	GU588088	Ictalurus furcatus clone CBZC5717 elongation of very long chain fatty acids protein 7 (ELOV7) mRNA complete cds	-2.042	9e-05	ELOVL7		ELOVL7	-2.042	ELOVL fatty acid elongase 7	Cytoplasm	enzyme
	TC150624	NM_001160555	Oncorhynchus mykiss Hemoglobin subunit beta-1 (hbb1) mRNA_x0001_gb-BT073157.1- Oncorhynchus mykiss clone omyk-evn-504-341 Hemoglobin subunit beta-1 putative mRNA complete cds	-2.053	0.001548	LANCL1		LANCL1	-2.053	LanC like 1	Plasma Membrane	enzyme
	TC132693	HM159472	Salmo salar clone BAC 261D01 Foxl2-like protein (Foxl2) gene complete cds	-2.058	3.1e-05	FOXL2		FOXL2	-2.058	forkhead box L2	Nucleus	transcription regulator
	TC133008	EF210363	Salmo salar clone CH214-714P22 MHC Class I (Sasa-UBA) gene Sasa-UBA*0601 allele partial cds; and proteasome subunit beta type 8 (PSMB8a) proteasome subunit beta type 10 (PSMB10a) PSMB9a-like (PSMB9a-like) proteosome subunit beta type 9 (PSMB9) transporter 2 ATP binding cassette (TAP2a) bromodomain containing 2 (BRD2) collagen Type XI Alpha2 (COL11A2) retinoid X receptor beta (RXRB) solute carrier…	-2.064	0.026266	SLC39A7		SLC39A7	-2.064	solute carrier family 39 member 7	Plasma Membrane	transporter
	TC163748	not-annotated	not-annotated	-2.08	9e-06	GALNT18		GALNT18	-2.08	polypeptide N-acetylgalactosaminyltransferase 18	Cytoplasm	enzyme
	TC137010	NM_001140434	Salmo salar cyclin E2 (ccne2) mRNA_x0001_gb-BT045855.1- Salmo salar clone ssal-rgf-534-307 G1/S-specific cyclin-E2 putative mRNA complete cds	-2.085	0.042266	CCNE2		CCNE2	-2.085	cyclin E2	Nucleus	other
	TC154024	NM_001004599	Danio rerio acyl-CoA synthetase long-chain family member 5 (acsl5) mRNA_x0001_gb-BC081587.1- Danio rerio zgc:92083 mRNA (cDNA clone MGC:92083 IMAGE:7046942) complete cds	-2.1	0.039005	ACSL6		ACSL6	-2.1	acyl-CoA synthetase long chain family member 6	Cytoplasm	enzyme
	TC162186	not-annotated	not-annotated	-2.1	0.015834	NLRP1		NLRP1	-2.1	NLR family pyrin domain containing 1	Cytoplasm	other
	TC163919	not-annotated	not-annotated	-2.104	0.033308	GIN1		GIN1	-2.104	gypsy retrotransposon integrase 1	Other	other
	TC138104	BT125274	Salmo salar clone ssal-rgb2-611-367 NipSnap homolog 2 putative mRNA complete cds	-2.116	0.023132	GBAS		NIPSNAP2	-2.116	nipsnap homolog 2	Plasma Membrane	other
	TC157993	NM_001140591	Salmo salar Cathepsin O (cato) mRNA_x0001_gb-BT046291.1- Salmo salar clone ssal-evf-555-225 Cathepsin O precursor putative mRNA complete cds	-2.119	0.00176	CTSO		CTSO	-2.119	cathepsin O	Cytoplasm	peptidase
	TC156343	HM210571	Oncorhynchus mykiss strain OSU-142 MHC class IA core region genomic sequence	-2.133	0.002355	MHCI		-	-2.133	-	-	-
	TC171591	BT059476	Salmo salar clone ssal-rgf-536-337 Nattectin precursor putative mRNA complete cds	-2.15	0.024092	ASGR2		ASGR2	-2.15	asialoglycoprotein receptor 2	Plasma Membrane	cell surface receptor
	TC164087	BT059596	Salmo salar clone ssal-rgf-516-344 U2 small nuclear ribonucleoprotein B putative mRNA complete cds	-2.158	0.024942	SNRPB2		SNRPB2	-2.158	small nuclear ribonucleoprotein polypeptide B2	Nucleus	other
	IMM 155	NM_001123277	Danio rerio si:dkey-91i10.3 (si:dkey-91i10.3) mRNA	-2.197	0.004912	CYP27A1		CYP27A1	-2.197	cytochrome P450 family 27 subfamily A member 1	Cytoplasm	enzyme
	TC166542	NM_001139791	Salmo salar CP068 protein (cp068) mRNA_x0001_gb-BT044662.1- Salmo salar clone ssal-rgf-002-113 C16orf68 putative mRNA complete cds	-2.198	0.001487	OGFR		OGFR	-2.198	opioid growth factor receptor	Plasma Membrane	other
	TC163785	NM_001140117	Salmo salar Glia-derived nexin (gdn) mRNA_x0001_gb-BT045269.1- Salmo salar clone ssal-rgf-517-030 Glia-derived nexin precursor putative mRNA complete cds	-2.2	0.014072	SERPINE2		SERPINE2	-2.2	serpin family E member 2	Extracellular Space	other
	TC156700	not-annotated	not-annotated	-2.211	0.000101	MUC2		MUC2	-2.211	mucin 2, oligomeric mucus/gel-forming	Extracellular Space	other
	TC142408	BX465208	Zebrafish DNA sequence from clone DKEYP-91H6 in linkage group 6 complete sequence	-2.216	0.010493	SOX14		SOX14	-2.216	SRY-box transcription factor 14	Nucleus	transcription regulator
	TC151400	NM_001114446	Danio rerio zgc:171428 (zgc:171428) mRNA_x0001_gb-BC155063.1- Danio rerio zgc:171428 mRNA (cDNA clone MGC:171428 IMAGE:5602380) complete cds	-2.227	0.025834	TBRG1		TBRG1	-2.227	transforming growth factor beta regulator 1	Nucleus	other
	TC148277	AY168195	Salvelinus fontinalis clone SfoC129 microsatellite sequence	-2.26	0.005129	COL28A1		COL28A1	-2.26	collagen type XXVIII alpha 1 chain	Extracellular Space	other
	TC166016	not-annotated	not-annotated	-2.261	0.016357	ZNF462		ZNF462	-2.261	zinc finger protein 462	Nucleus	transcription regulator
	TC152402	XM_003198629	PREDICTED: Danio rerio microtubule-associated protein 1B (map1b) mRNA	-2.266	0.01617	MAP1B		MAP1B	-2.266	microtubule associated protein 1B	Cytoplasm	other
	IMM 356	not-annotated	not-annotated	-2.267	0.027733	PRKRA		PRKRA	-2.267	protein activator of interferon induced protein kinase EIF2AK2	Cytoplasm	other
	TC160730	XM_682882	PREDICTED: Danio rerio si:ch211-1n9.7 (si:ch211-1n9.7) mRNA	-2.297	0.022042	DNA2		DNA2	-2.297	DNA replication helicase/nuclease 2	Cytoplasm	enzyme
	TC157315	not-annotated	not-annotated	-2.299	0.01165	IPCEF1		IPCEF1	-2.299	interaction protein for cytohesin exchange factors 1	Cytoplasm	enzyme
	TC165395	AL807792	Zebrafish DNA sequence from clone CH211-247L22 in linkage group 8 Contains the 3' end of the grid2 gene for glutamate receptor ionotropic delta 2 the atoh1a gene for atonal homolog 1a the gene for a novel protein similar to vertebrate SWI/SNF-related matrix-associated actin-dependent regulator of chromatin subfamily a containing DEAD/H box 1 (SMARCAD1 zgc:113183) the gene for a novel protein simi…	-2.31	0.023955	MPEG1		MPEG1	-2.31	macrophage expressed 1	Cytoplasm	other
	TC135860	not-annotated	not-annotated	-2.315	9e-06	GRK5		GRK5	-2.315	G protein-coupled receptor kinase 5	Plasma Membrane	kinase
	TC150242	not-annotated	not-annotated	-2.317	0.021996	NLRX1		NLRX1	-2.317	NLR family member X1	Cytoplasm	other
	TC160379	XM_002723009	PREDICTED: Oryctolagus cuniculus CLIP-associating protein 1-like transcript variant 6 (LOC100345130) mRNA	-2.32	0.010474	CLASP1		CLASP1	-2.32	cytoplasmic linker associated protein 1	Cytoplasm	other
	TC141179	BT049837	Salmo salar clone ssal-eve-510-358 Cytochrome b-c1 complex subunit Rieske mitochondrial precursor putative mRNA complete cds	-2.331	0.027153	UQCRFS1		UQCRFS1	-2.331	ubiquinol-cytochrome c reductase, Rieske iron-sulfur polypeptide 1	Cytoplasm	enzyme
	TC146460	NM_001162502	Danio rerio non-SMC condensin I complex subunit D2 (ncapd2) mRNA_x0001_gb-BC133123.1- Danio rerio similar to Im:6902697 protein mRNA (cDNA clone IMAGE:2351833) partial cds	-2.335	0.025795	NCAPD2		NCAPD2	-2.335	non-SMC condensin I complex subunit D2	Nucleus	other
	TC156580	BC117601	Danio rerio LIM homeobox 8 mRNA (cDNA clone MGC:136448 IMAGE:7893804) complete cds	-2.34	0.001051	LHX8		LHX8	-2.34	LIM homeobox 8	Nucleus	transcription regulator
	TC156404	NM_001080616	Danio rerio vacuolar protein sorting 8 homolog (S. cerevisiae) (vps8) mRNA	-2.346	0.030829	VPS8		VPS8	-2.346	VPS8 subunit of CORVET complex	Cytoplasm	other
	TC146852	NM_001161340	Danio rerio myomesin 1a (skelemin) (myom1a) mRNA	-2.349	0.003765	MYOM1		MYOM1	-2.349	myomesin 1	Cytoplasm	other
	TC135143	NM_001141868	Salmo salar nuclear import 7 homolog (S. cerevisiae) (nip7) mRNA_x0001_gb-BT048261.1- Salmo salar clone ssal-eve-526-151 60S ribosome subunit biogenesis protein NIP7 homolog putative mRNA complete cds	-2.355	0.030211	NIP7		NIP7	-2.355	nucleolar pre-rRNA processing protein NIP7	Nucleus	other
	TC171691	BT043779	Salmo salar clone HM4_1447 actin alpha 1-1 (actc1-1) mRNA complete cds	-2.363	0.046294	ACTA1		ACTA1	-2.363	actin alpha 1, skeletal muscle	Cytoplasm	other
	TC150955	not-annotated	not-annotated	-2.364	9.4e-05	ERMAP		ERMAP	-2.364	erythroblast membrane associated protein (Scianna blood group)	Cytoplasm	other
	TC146228	NM_201333	Danio rerio missing oocyte meiosis regulator homolog (Drosophila) (mios) mRNA_x0001_gb-BC047198.1- Danio rerio missing oocyte meiosis regulator homolog (Drosophila) mRNA (cDNA clone MGC:55958 IMAGE:3819386) complete cds	-2.368	0.003733	MIOS		MIOS	-2.368	meiosis regulator for oocyte development	Cytoplasm	other
	TC149310	BT047272	Salmo salar clone ssal-eve-503-354 Dynein light chain 1 cytoplasmic putative mRNA complete cds	-2.381	0.02334	DYNLL2		DYNLL2	-2.381	dynein light chain LC8-type 2	Cytoplasm	other
	TC165340	BC165615	Danio rerio mannosyl (beta-14-)-glycoprotein beta-14-N-acetylglucosaminyltransferase mRNA (cDNA clone MGC:192703 IMAGE:100061162) complete cds	-2.383	0.010451	MGAT3		MGAT3	-2.383	beta-1,4-mannosyl-glycoprotein 4-beta-N-acetylglucosaminyltransferase	Cytoplasm	enzyme
	IMM 515	DQ629591	Oncorhynchus mykiss calreticulin (CRT) gene promoter region and partial cds	-2.391	0.047573	CRT		-	-2.391	-	-	-
	TC142978	not-annotated	not-annotated	-2.427	0.039678	WDPCP		WDPCP	-2.427	WD repeat containing planar cell polarity effector	Plasma Membrane	other
	TC140303	NM_001140384	Salmo salar Casein kinase I isoform epsilon (kc1e) mRNA_x0001_gb-BT045767.1- Salmo salar clone ssal-rgf-530-332 Casein kinase I isoform epsilon putative mRNA complete cds	-2.437	0.033671	CSNK1E		CSNK1E	-2.437	casein kinase 1 epsilon	Cytoplasm	kinase
	TC147667	NM_001173639	Salmo salar Spartin (spg20) mRNA_x0001_gb-BT059140.1- Salmo salar clone ssal-rgf-527-370 Spartin putative mRNA complete cds	-2.439	0.045112	SPG20		SPART	-2.439	spartin	Cytoplasm	other
	TC145821	BC092999	Danio rerio transmembrane protein 161A mRNA (cDNA clone IMAGE:7175921)	-2.439	0.012752	TMEM161A		TMEM161A	-2.439	transmembrane protein 161A	Other	other
	TC161802	BT026836	Gasterosteus aculeatus clone CFW64-D10 mRNA sequence	-2.444	1.7e-05	CDCA7		CDCA7	-2.444	cell division cycle associated 7	Nucleus	other
	TC167856	XM_002696839	PREDICTED: Bos taurus cytoplasmic dynein 1 heavy chain 1-like (LOC537748) mRNA_x0001_ref-NM_001206138.1- Bos taurus dynein cytoplasmic 1 heavy chain 1 (DYNC1H1) mRNA	-2.464	0.034073	DYNC1H1		DYNC1H1	-2.464	dynein cytoplasmic 1 heavy chain 1	Cytoplasm	peptidase
	TC172379	AB162342	Oncorhynchus mykiss genes MHC class I a region complete and partial cds	-2.47	0.010744	PRPF6		PRPF6	-2.47	pre-mRNA processing factor 6	Nucleus	transcription regulator
	TC133368	BT125249	Salmo salar clone ssal-evd-503-288 Proteasome subunit alpha type-7 putative mRNA complete cds	-2.482	0.003784	LSM14B		LSM14B	-2.482	LSM family member 14B	Other	other
	TC163616	NM_001165081	Oncorhynchus mykiss Retinol dehydrogenase 3 (rdh3) mRNA_x0001_gb-BT073827.1- Oncorhynchus mykiss clone omyk-evo-513-317 Retinol dehydrogenase 3 putative mRNA complete cds	-2.487	0.00358	RDH5		RDH5	-2.487	retinol dehydrogenase 5	Cytoplasm	enzyme
	CUST_15_PI425348775	IL-12P35	0	-2.497	0.014352	1L12A		-	-2.497	-	-	-
	TC163681	BX908795	Zebrafish DNA sequence from clone DKEY-92J12 in linkage group 1 Contains the ldb2l gene for LIM-domain binding factor 2 like the gene for a novel protein similar to quinoid dihydropteridine reductase (QDPR zgc:112405) the 5' end of the proml2 gene for prominin-like 2 the 5' end of the gtf2e2 gene for general transcription factor IIE polypeptide 2 beta a novel gene and a CpG island complete sequen…	-2.499	0.04452	TAPT1		TAPT1	-2.499	transmembrane anterior posterior transformation 1	Plasma Membrane	G-protein coupled receptor
	TC148443	BT026754	Gasterosteus aculeatus clone CFW25-F08 mRNA sequence	-2.501	0.03065	TECR		TECR	-2.501	trans-2,3-enoyl-CoA reductase	Plasma Membrane	enzyme
	TC140776	NM_001139805	Salmo salar chitinase domain containing 1 (chid1) mRNA_x0001_gb-BT044693.1- Salmo salar clone ssal-rgf-002-377 Chitinase domain-containing protein 1 precursor putative mRNA complete cds	-2.534	0.049892	CHID1		CHID1	-2.534	chitinase domain containing 1	Extracellular Space	other
	TC137396	BT072259	Salmo salar clone ssal-rgf-518-328 ATP-binding cassette sub-family G member 2 putative mRNA partial cds	-2.551	1e-06	ABCG2		ABCG2	-2.551	ATP binding cassette subfamily G member 2 (Junior blood group)	Plasma Membrane	transporter
	TC165889	BT072022	Salmo salar clone ssal-rgf-507-381 Cytoplasmic dynein 1 intermediate chain 1 putative mRNA partial cds	-2.562	0.039251	DYNC1I1		DYNC1I1	-2.562	dynein cytoplasmic 1 intermediate chain 1	Cytoplasm	other
	TC170143	BC164206	Danio rerio zgc:103530 mRNA (cDNA clone MGC:191381 IMAGE:100059690) complete cds	-2.585	0.031157	BACE2		BACE2	-2.585	beta-secretase 2	Cytoplasm	peptidase
	TC139268	NM_001140262	Salmo salar RAD21 homolog (S. pombe) (rad21) mRNA_x0001_gb-BT045542.1- Salmo salar clone ssal-rgf-524-220 Double-strand-break repair protein rad21 homolog putative mRNA complete cds	-2.62	0.005406	RAD21		RAD21	-2.62	RAD21 cohesin complex component	Nucleus	transcription regulator
	TC164647	BT059449	Salmo salar clone ssal-rgf-525-153 U4/U6 small nuclear ribonucleoprotein Prp4 putative mRNA complete cds	-2.7	0.010741	PPP1R3B		PPP1R3B	-2.7	protein phosphatase 1 regulatory subunit 3B	Cytoplasm	phosphatase
	TC154633	XR_082678	PREDICTED: Danio rerio similar to AFG3(ATPase family gene 3)-like 1 (LOC570430) miscRNA	-2.709	0.002947	AFG3L2		AFG3L2	-2.709	AFG3 like matrix AAA peptidase subunit 2	Cytoplasm	peptidase
	TC156392	BT059861	Salmo salar clone ssal-rgg-506-208 C-C motif chemokine 19 precursor putative mRNA complete cds	-2.739	0.000298	SDS		SDS	-2.739	serine dehydratase	Cytoplasm	enzyme
	TC136608	NM_001141737	Salmo salar pseudouridylate synthase 7 homolog (S. cerevisiae) (pus7) mRNA_x0001_gb-BT045056.1- Salmo salar clone ssal-rgf-510-315 Pseudouridylate synthase 7 homolog putative mRNA complete cds	-2.742	0.028951	PUS7		PUS7	-2.742	pseudouridine synthase 7	Nucleus	enzyme
	TC142386	NM_001140289	Salmo salar optineurin (optn) mRNA_x0001_gb-BT045591.1- Salmo salar clone ssal-rgf-525-350 Optineurin putative mRNA complete cds	-2.747	0.014076	OPTN		OPTN	-2.747	optineurin	Cytoplasm	other
	TC132333	NM_001124419	Oncorhynchus mykiss Toll-like receptor II (LOC100136121) mRNA_x0001_emb-AJ878915.1- Oncorhynchus mykiss mRNA for Toll-like receptor II (tlr II gene)	-2.75	0.035447	TLR3		TLR3	-2.75	toll like receptor 3	Plasma Membrane	cell surface receptor
	TC150889	BT072722	Salmo salar clone ssal-rgf-538-026 Band 4.1-like protein 2 putative mRNA partial cds	-2.755	0.014021	EPB41L2		EPB41L2	-2.755	erythrocyte membrane protein band 4.1 like 2	Plasma Membrane	other
	TC165858	not-annotated	not-annotated	-2.775	0.009034	B3GNT5		B3GNT5	-2.775	UDP-GlcNAc:betaGal beta-1,3-N-acetylglucosaminyltransferase 5	Cytoplasm	enzyme
	TC154401	NM_001140966	Salmo salar Dehydrogenase/reductase SDR family member 4 (dhrs4) mRNA_x0001_gb-BT047712.1- Salmo salar clone ssal-evf-504-340 Dehydrogenase/reductase SDR family member 4 putative mRNA complete cds	-2.791	0.009788	DHRS4L2		DHRS4L2	-2.791	dehydrogenase/reductase 4 like 2	Other	other
	TC155290	FJ438515	Epinephelus coioides CUB/zona pellucida-like domains 1-like protein mRNA partial cds	-2.804	0.000608	DMBT1		DMBT1	-2.804	deleted in malignant brain tumors 1	Plasma Membrane	cell surface receptor
	TC149173	not-annotated	not-annotated	-2.818	0.028861	ZNF774		ZNF774	-2.818	zinc finger protein 774	Other	other
	TC166964	NM_001140325	Salmo salar Dr1 (nc2b) mRNA_x0001_gb-BT045654.1- Salmo salar clone ssal-rgf-527-366 Dr1 putative mRNA complete cds	-2.879	0.014899	DR1		DR1	-2.879	down-regulator of transcription 1	Nucleus	transcription regulator
	TC132583	NM_001124506	Oncorhynchus mykiss outer dense fiber of sperm tail protein 3 (odf3) mRNA_x0001_gb-AY601673.1- Oncorhynchus mykiss outer dense fiber of sperm tail protein 3 (ODF3) mRNA complete cds	-2.909	0.015834	ODF3		ODF3	-2.909	outer dense fiber of sperm tails 3	Cytoplasm	other
	TC136878	BT026639	Gasterosteus aculeatus clone CEC30-C05 mRNA sequence	-2.982	0.028734	PABPC1		PABPC1	-2.982	poly(A) binding protein cytoplasmic 1	Cytoplasm	translation regulator
	TC142986	BT059291	Salmo salar clone ssal-rgf-539-145 Lysosome-associated membrane glycoprotein 2 precursor putative mRNA complete cds	-3.068	0.005944	LAMP2		LAMP2	-3.068	lysosomal associated membrane protein 2	Plasma Membrane	enzyme
	TC165970	BT057618	Salmo salar clone ssal-eve-567-083 Regulator of G-protein signaling 2 putative mRNA complete cds	-3.075	8e-06	RGS2		RGS2	-3.075	regulator of G protein signaling 2	Nucleus	enzyme
	TC139961	NM_001141560	Salmo salar ribonuclease P/MRP 30 subunit (rpp30) mRNA_x0001_gb-BT050151.1- Salmo salar clone ssal-eve-552-168 Ribonuclease P protein subunit p30 putative mRNA complete cds	-3.076	0.023151	RPP30		RPP30	-3.076	ribonuclease P/MRP subunit p30	Nucleus	enzyme
	TC171668	NM_001140476	Salmo salar Homeobox protein PKNOX1 (pknx1) mRNA_x0001_gb-BT045935.1- Salmo salar clone ssal-rgf-537-058 Homeobox protein PKNOX1 putative mRNA complete cds	-3.086	0.025781	PKNOX1		PKNOX1	-3.086	PBX/knotted 1 homeobox 1	Nucleus	transcription regulator
	TC139270	XM_419848	PREDICTED: Gallus gallus hypothetical LOC421824 (LOC421824) mRNA	-3.106	0.006282	C6orf165		CFAP206	-3.106	cilia and flagella associated protein 206	Cytoplasm	other
	IMM 1053	NM_001124367	Oncorhynchus mykiss CC chemokine (LOC100136057) mRNA_x0001_emb-AJ315149.2- Oncorhynchus mykiss mRNA for CC chemokine	-3.116	0.048168	CK2		-	-3.116	-	-	-
	TC156811	XM_002196677	PREDICTED: Taeniopygia guttata similar to Eps8l2 protein (LOC100220061) mRNA	-3.242	0.022645	EPS8L2		EPS8L2	-3.242	EPS8 like 2	Cytoplasm	other
	TC153166	NM_001140020	Salmo salar Transmembrane protein 163 (tm163) mRNA_x0001_gb-BT045080.1- Salmo salar clone ssal-rgf-511-188 Transmembrane protein 163 putative mRNA complete cds	-3.45	0.0426	TMEM163		TMEM163	-3.45	transmembrane protein 163	Cytoplasm	other
	TC137459	XM_001506277	PREDICTED: Ornithorhynchus anatinus similar to putative lipid kinase (LOC100074743) mRNA	-3.501	0.004665	CERK		CERK	-3.501	ceramide kinase	Plasma Membrane	kinase
	TC142811	AM993097	Dicentrarchus labrax partial mRNA for pif1 protein	-3.634	0.005649	PIF1		PIF1	-3.634	PIF1 5'-to-3' DNA helicase	Nucleus	enzyme
	TC164105	not-annotated	not-annotated	-3.728	0.015694	TRIM39		TRIM39	-3.728	tripartite motif containing 39	Cytoplasm	other
	TC143352	not-annotated	not-annotated	-3.748	0.005093	PPP1R32		PPP1R32	-3.748	protein phosphatase 1 regulatory subunit 32	Other	other
	TC156250	XM_001923227	PREDICTED: Danio rerio disintegrin and metalloproteinase domain-containing protein 23 (wu:fj40f01) mRNA	-3.842	0.004881	ADAM23		ADAM23	-3.842	ADAM metallopeptidase domain 23	Plasma Membrane	peptidase
	TC155990	BT071868	Salmo salar clone ssal-rgf-501-117 Suppressor of G2 allele of SKP1 homolog putative mRNA partial cds	-4.638	0.039406	SUGT1		SUGT1	-4.638	SGT1 homolog, MIS12 kinetochore complex assembly cochaperone	Nucleus	other
	TC151033	NM_001077211	Danio rerio mechanistic target of rapamycin (serine/threonine kinase) (mtor) mRNA_x0001_gb-DQ666026.2- Danio rerio target of rapamycin (tor) mRNA complete cds	-4.769	0.001192	MTOR		MTOR	-4.769	mechanistic target of rapamycin kinase	Nucleus	kinase
	TC138623	BT059061	Salmo salar clone ssal-rgf-523-120 RING finger protein 10 putative mRNA complete cds	-5.078	0.003842	RNF10		RNF10	-5.078	ring finger protein 10	Cytoplasm	enzyme
	TC170687	NM_001124552	Oncorhynchus mykiss transferrin (LOC100136298) mRNA	-5.323	0.035514	TF		TF	-5.323	transferrin	Extracellular Space	transporter
	TC154912	DQ011072	Oreochromis mossambicus TAK1-binding protein 3 isoform 1-like mRNA partial sequence	-5.554	0.000857	TAB3		TAB3	-5.554	TGF-beta activated kinase 1 (MAP3K7) binding protein 3	Cytoplasm	other
	TC170834	EU621899	Salmo salar clone 63I10 growth hormone 2 gene complete cds; and skeletal muscle sodium channel alpha subunit-like myosin alkali light chain-like and microtubule-associated protein Tau-like genes complete sequence	-5.882	0.002425	CCDC40		CCDC40	-5.882	coiled-coil domain containing 40	Cytoplasm	other
	TC144757	BX296527	Zebrafish DNA sequence from clone DKEYP-32C3 in linkage group 2 complete sequence	-6.018	0.013216	MCM6		MCM6	-6.018	minichromosome maintenance complex component 6	Nucleus	enzyme
	TC156309	not-annotated	not-annotated	-6.495	0.001577	MUC5B		MUC5B	-6.495	mucin 5B, oligomeric mucus/gel-forming	Extracellular Space	peptidase
	TC142207	GU564440	Hypomesus transpacificus chitinase mRNA partial cds	-7.777	0.00033	CHIA		CHIA	-7.777	chitinase acidic	Extracellular Space	enzyme
	Multiple RNA targets mapped to the same HGNC gene identifier (multiple RNA targets → 1 HGNC gene identifier), with the same direction of change (multiple Log2 FC values averaged)
	TC164339	HQ400613	Oncorhynchus mykiss ABC efflux transporter Abcb1b mRNA partial cds	-1.46	0.000122	ABCB4		ABCB4	-1.7985	ATP binding cassette subfamily B member 4	Plasma Membrane	transporter
	TC142529	HQ400613	Oncorhynchus mykiss ABC efflux transporter Abcb1b mRNA partial cds	-2.137	2e-06	ABCB4		ABCB4		ATP binding cassette subfamily B member 4	Plasma Membrane	transporter
	TC157608	NM_001139811	Salmo salar ATP-binding cassette sub-family F (GCN20) member 2 (abcf2) nuclear gene encoding mitochondrial protein mRNA_x0001_gb-BT044705.1- Salmo salar clone ssal-rgf-501-085 ATP-binding cassette sub-family F member 2 putative mRNA complete cds	2.204	2e-06	ABCF2		ABCF2	1.834	ATP binding cassette subfamily F member 2	Cytoplasm	transporter
	TC153932	NM_001139811	Salmo salar ATP-binding cassette sub-family F (GCN20) member 2 (abcf2) nuclear gene encoding mitochondrial protein mRNA_x0001_gb-BT044705.1- Salmo salar clone ssal-rgf-501-085 ATP-binding cassette sub-family F member 2 putative mRNA complete cds	1.748	0.003719	ABCF2		ABCF2		ATP binding cassette subfamily F member 2	Cytoplasm	transporter
	TC151203	NM_001139811	Salmo salar ATP-binding cassette sub-family F (GCN20) member 2 (abcf2) nuclear gene encoding mitochondrial protein mRNA_x0001_gb-BT044705.1- Salmo salar clone ssal-rgf-501-085 ATP-binding cassette sub-family F member 2 putative mRNA complete cds	1.55	0.000459	ABCF2		ABCF2		ATP binding cassette subfamily F member 2	Cytoplasm	transporter
	TC148603	NM_001173759	Salmo salar Abhydrolase domain-containing protein FAM108B1 (f108b) mRNA_x0001_gb-BT059431.1- Salmo salar clone ssal-rgf-535-234 Abhydrolase domain-containing protein FAM108B1 precursor putative mRNA complete cds	2.706	1e-06	ABHD17B		ABHD17B	2.6305	abhydrolase domain containing 17B, depalmitoylase	Plasma Membrane	peptidase
	TC159819	NM_001173759	Salmo salar Abhydrolase domain-containing protein FAM108B1 (f108b) mRNA_x0001_gb-BT059431.1- Salmo salar clone ssal-rgf-535-234 Abhydrolase domain-containing protein FAM108B1 precursor putative mRNA complete cds	2.555	0.000111	ABHD17B		ABHD17B		abhydrolase domain containing 17B, depalmitoylase	Plasma Membrane	peptidase
	TC167645	X73233	O.nerka mRNA for neuropeptides	2.367	0.002749	ADCYAP1		ADCYAP1	2.026	adenylate cyclase activating polypeptide 1	Extracellular Space	other
	TC157811	NM_001124297	Oncorhynchus mykiss growth hormone-releasing hormone/pituitary adenylate cyclase-activating polypeptide (LOC100135955) mRNA_x0001_gb-AF343976.1-AF343976 Oncorhynchus mykiss growth hormone-releasing hormone/pituitary adenylate cyclase-activating polypeptide mRNA complete cds alternatively spliced	1.685	0.013377	ADCYAP1		ADCYAP1		adenylate cyclase activating polypeptide 1	Extracellular Space	other
	TC169810	BT071876	Salmo salar clone ssal-rgf-501-216 unknown large open reading frame mRNA novel cds	1.364	0.012452	AHNAK		AHNAK	1.239	AHNAK nucleoprotein	Nucleus	other
	TC167413	BT072112	Salmo salar clone ssal-rgf-512-079 Neuroblast differentiation-associated protein AHNAK putative mRNA partial cds	1.114	0.041148	AHNAK		AHNAK		AHNAK nucleoprotein	Nucleus	other
	TC136560	FJ969489	Salmo salar clone BAC CHORI214-184H23 aryl hydrocarbon receptor 2 alpha (AhR2a) gene partial cds; aryl hydrocarbon receptor 1 beta-like protein (AhR1b) gene MHC class I antigen (Sasa-UHA1) gene Sasa-UHA1*0101 allele MHC class I antigen (Sasa-UHA2) gene Sasa-UHA2*0101 allele and 1-acylglycerol-3-phosphate O-acyltransferase 3 (AGPAT3) gene complete cds; and pyroxidal kinase (PDXK) gene partial cds	-1.089	0.000197	AHR		AHR	-1.8295	aryl hydrocarbon receptor	Nucleus	ligand-dependent nuclear receptor
	TC139026	FJ969489	Salmo salar clone BAC CHORI214-184H23 aryl hydrocarbon receptor 2 alpha (AhR2a) gene partial cds; aryl hydrocarbon receptor 1 beta-like protein (AhR1b) gene MHC class I antigen (Sasa-UHA1) gene Sasa-UHA1*0101 allele MHC class I antigen (Sasa-UHA2) gene Sasa-UHA2*0101 allele and 1-acylglycerol-3-phosphate O-acyltransferase 3 (AGPAT3) gene complete cds; and pyroxidal kinase (PDXK) gene partial cds	-2.57	0.011995	AHR		AHR		aryl hydrocarbon receptor	Nucleus	ligand-dependent nuclear receptor
	TC136364	NM_001195163	Oncorhynchus mykiss akirin 1(2a) (LOC100499585) mRNA_x0001_gb-GQ247782.1- Oncorhynchus mykiss akirin 1(2a) mRNA complete cds	-1.363	0.015828	AKIRIN1		AKIRIN1	-1.556	akirin 1	Cytoplasm	enzyme
	TC143355	NM_001195163	Oncorhynchus mykiss akirin 1(2a) (LOC100499585) mRNA_x0001_gb-GQ247782.1- Oncorhynchus mykiss akirin 1(2a) mRNA complete cds	-1.749	0.046799	AKIRIN1		AKIRIN1		akirin 1	Cytoplasm	enzyme
	TC132546	NM_001165183	Oncorhynchus mykiss CF166 protein (cf166) mRNA_x0001_gb-BT074237.1- Oncorhynchus mykiss clone omyk-evo-512-355 C6orf166 putative mRNA complete cds	1.369	0.000152	AKIRIN2		AKIRIN2	1.33033	akirin 2	Nucleus	other
	TC137056	NM_001195165	Oncorhynchus mykiss akirin 2(1a) (LOC100499587) mRNA_x0001_gb-GQ247784.1- Oncorhynchus mykiss akirin 2(1a) mRNA complete cds	1.359	2.2e-05	AKIRIN2		AKIRIN2		akirin 2	Nucleus	other
	TC165365	NM_001165183	Oncorhynchus mykiss CF166 protein (cf166) mRNA_x0001_gb-BT074237.1- Oncorhynchus mykiss clone omyk-evo-512-355 C6orf166 putative mRNA complete cds	1.263	0.000532	AKIRIN2		AKIRIN2		akirin 2	Nucleus	other
	TC149043	BT045241	Salmo salar clone ssal-rgf-516-072 5-aminolevulinate synthase nonspecific mitochondrial precursor putative mRNA complete cds	1.848	1e-06	ALAS1		ALAS1	1.5704	5'-aminolevulinate synthase 1	Cytoplasm	enzyme
	TC146569	BT045241	Salmo salar clone ssal-rgf-516-072 5-aminolevulinate synthase nonspecific mitochondrial precursor putative mRNA complete cds	1.756	0.001179	ALAS1		ALAS1		5'-aminolevulinate synthase 1	Cytoplasm	enzyme
	TC145487	BT045241	Salmo salar clone ssal-rgf-516-072 5-aminolevulinate synthase nonspecific mitochondrial precursor putative mRNA complete cds	1.746	6e-06	ALAS1		ALAS1		5'-aminolevulinate synthase 1	Cytoplasm	enzyme
	TC162412	BT045241	Salmo salar clone ssal-rgf-516-072 5-aminolevulinate synthase nonspecific mitochondrial precursor putative mRNA complete cds	1.403	0.000114	ALAS1		ALAS1		5'-aminolevulinate synthase 1	Cytoplasm	enzyme
	TC156910	BT045241	Salmo salar clone ssal-rgf-516-072 5-aminolevulinate synthase nonspecific mitochondrial precursor putative mRNA complete cds	1.099	0.000553	ALAS1		ALAS1		5'-aminolevulinate synthase 1	Cytoplasm	enzyme
	IMM 1013	AY594646	Oncorhynchus mykiss cathelicidin (CATH-1) gene complete cds	3.559	2e-06	AMP		-	2.62325	-	-	-
	IMM 486	NM_001124480	Oncorhynchus mykiss cathelicidin 1 (LOC100136204) mRNA_x0001_gb-AY382478.1- Oncorhynchus mykiss cathelicidin 1 mRNA complete cds	3.33	6e-06	AMP		-		-	-	-
	TC159998	NM_001124480	Oncorhynchus mykiss cathelicidin 1 (LOC100136204) mRNA_x0001_gb-AY382478.1- Oncorhynchus mykiss cathelicidin 1 mRNA complete cds	3.287	3e-06	AMP		-		-	-	-
	TC146846	NM_001124480	Oncorhynchus mykiss cathelicidin 1 (LOC100136204) mRNA_x0001_gb-AY382478.1- Oncorhynchus mykiss cathelicidin 1 mRNA complete cds	3.237	4e-06	AMP		-		-	-	-
	IMM 985	AY594646	Oncorhynchus mykiss cathelicidin (CATH-1) gene complete cds	3.205	8.6e-05	AMP		-		-	-	-
	IMM 1013	AY594646	Oncorhynchus mykiss cathelicidin (CATH-1) gene complete cds	3.159	8e-06	AMP		-		-	-	-
	IMM 1013	AY594646	Oncorhynchus mykiss cathelicidin (CATH-1) gene complete cds	3.154	7.5e-05	AMP		-		-	-	-
	IMM 486	NM_001124480	Oncorhynchus mykiss cathelicidin 1 (LOC100136204) mRNA_x0001_gb-AY382478.1- Oncorhynchus mykiss cathelicidin 1 mRNA complete cds	3.038	5e-06	AMP		-		-	-	-
	IMM 985	AY594646	Oncorhynchus mykiss cathelicidin (CATH-1) gene complete cds	3.016	8.6e-05	AMP		-		-	-	-
	IMM 984	NM_001124480	Oncorhynchus mykiss cathelicidin 1 (LOC100136204) mRNA_x0001_gb-AY382478.1- Oncorhynchus mykiss cathelicidin 1 mRNA complete cds	2.991	2.1e-05	AMP		-		-	-	-
	IMM 486	NM_001124480	Oncorhynchus mykiss cathelicidin 1 (LOC100136204) mRNA_x0001_gb-AY382478.1- Oncorhynchus mykiss cathelicidin 1 mRNA complete cds	2.975	3e-06	AMP		-		-	-	-
	IMM 568	NM_001124480	Oncorhynchus mykiss cathelicidin 1 (LOC100136204) mRNA_x0001_gb-AY382478.1- Oncorhynchus mykiss cathelicidin 1 mRNA complete cds	2.97	7e-06	AMP		-		-	-	-
	IMM 984	NM_001124480	Oncorhynchus mykiss cathelicidin 1 (LOC100136204) mRNA_x0001_gb-AY382478.1- Oncorhynchus mykiss cathelicidin 1 mRNA complete cds	2.902	1.3e-05	AMP		-		-	-	-
	IMM 568	NM_001124480	Oncorhynchus mykiss cathelicidin 1 (LOC100136204) mRNA_x0001_gb-AY382478.1- Oncorhynchus mykiss cathelicidin 1 mRNA complete cds	2.852	7e-06	AMP		-		-	-	-
	IMM 984	NM_001124480	Oncorhynchus mykiss cathelicidin 1 (LOC100136204) mRNA_x0001_gb-AY382478.1- Oncorhynchus mykiss cathelicidin 1 mRNA complete cds	2.806	7e-06	AMP		-		-	-	-
	IMM 568	NM_001124480	Oncorhynchus mykiss cathelicidin 1 (LOC100136204) mRNA_x0001_gb-AY382478.1- Oncorhynchus mykiss cathelicidin 1 mRNA complete cds	2.758	2.7e-05	AMP		-		-	-	-
	IMM 985	AY594646	Oncorhynchus mykiss cathelicidin (CATH-1) gene complete cds	2.415	9.7e-05	AMP		-		-	-	-
	TC151905	NM_001124463	Oncorhynchus mykiss cathelicidin antimicrobial peptide (LOC100136187) mRNA_x0001_gb-AY360356.1- Oncorhynchus mykiss cathelicidin antimicrobial peptide mRNA complete cds	1.839	0.000145	AMP		-		-	-	-
	IMM 563	NM_001124463	Oncorhynchus mykiss cathelicidin antimicrobial peptide (LOC100136187) mRNA_x0001_gb-AY360356.1- Oncorhynchus mykiss cathelicidin antimicrobial peptide mRNA complete cds	1.748	0.000218	AMP		-		-	-	-
	IMM 563	NM_001124463	Oncorhynchus mykiss cathelicidin antimicrobial peptide (LOC100136187) mRNA_x0001_gb-AY360356.1- Oncorhynchus mykiss cathelicidin antimicrobial peptide mRNA complete cds	1.699	0.00028	AMP		-		-	-	-
	IMM 482	NM_001124463	Oncorhynchus mykiss cathelicidin antimicrobial peptide (LOC100136187) mRNA_x0001_gb-AY360356.1- Oncorhynchus mykiss cathelicidin antimicrobial peptide mRNA complete cds	1.539	0.000732	AMP		-		-	-	-
	IMM 563	NM_001124463	Oncorhynchus mykiss cathelicidin antimicrobial peptide (LOC100136187) mRNA_x0001_gb-AY360356.1- Oncorhynchus mykiss cathelicidin antimicrobial peptide mRNA complete cds	1.534	0.000435	AMP		-		-	-	-
	IMM 482	NM_001124463	Oncorhynchus mykiss cathelicidin antimicrobial peptide (LOC100136187) mRNA_x0001_gb-AY360356.1- Oncorhynchus mykiss cathelicidin antimicrobial peptide mRNA complete cds	1.492	0.001671	AMP		-		-	-	-
	IMM 482	NM_001124463	Oncorhynchus mykiss cathelicidin antimicrobial peptide (LOC100136187) mRNA_x0001_gb-AY360356.1- Oncorhynchus mykiss cathelicidin antimicrobial peptide mRNA complete cds	1.453	0.001207	AMP		-		-	-	-
	TC155053	NM_001165333	Salmo salar Anaphase-promoting complex subunit 5 (anc5) mRNA_x0001_gb-BT058792.1- Salmo salar clone ssal-rgf-503-119 Anaphase-promoting complex subunit 5 putative mRNA complete cds	-1.114	0.001117	ANAPC5		ANAPC5	-1.2535	anaphase promoting complex subunit 5	Nucleus	other
	TC155204	NM_001165333	Salmo salar Anaphase-promoting complex subunit 5 (anc5) mRNA_x0001_gb-BT058792.1- Salmo salar clone ssal-rgf-503-119 Anaphase-promoting complex subunit 5 putative mRNA complete cds	-1.393	4.6e-05	ANAPC5		ANAPC5		anaphase promoting complex subunit 5	Nucleus	other
	TC143995	BT027676	Gasterosteus aculeatus clone CGX83-B03 mRNA sequence	2.122	1e-06	ANGPTL7		ANGPTL7	2.0085	angiopoietin like 7	Extracellular Space	other
	TC137830	BT027676	Gasterosteus aculeatus clone CGX83-B03 mRNA sequence	1.895	6e-06	ANGPTL7		ANGPTL7		angiopoietin like 7	Extracellular Space	other
	TC148246	BT059450	Salmo salar clone ssal-rgf-506-287 Acidic leucine-rich nuclear phosphoprotein 32 family member E putative mRNA complete cds	-1.177	0.022857	ANP32E		ANP32E	-1.5905	acidic nuclear phosphoprotein 32 family member E	Nucleus	other
	TC147066	BT059450	Salmo salar clone ssal-rgf-506-287 Acidic leucine-rich nuclear phosphoprotein 32 family member E putative mRNA complete cds	-2.004	0.028874	ANP32E		ANP32E		acidic nuclear phosphoprotein 32 family member E	Nucleus	other
	TC150875	BT058891	Salmo salar clone ssal-rgf-511-242 Annexin A11 putative mRNA complete cds	3.821	0	ANXA11		ANXA11	2.287	annexin A11	Nucleus	other
	TC136617	BT058891	Salmo salar clone ssal-rgf-511-242 Annexin A11 putative mRNA complete cds	3.48	0	ANXA11		ANXA11		annexin A11	Nucleus	other
	TC137268	NM_001139997	Salmo salar Annexin A11 (anx11) mRNA_x0001_gb-BT045034.1- Salmo salar clone ssal-rgf-510-144 Annexin A11 putative mRNA complete cds	1.599	0.046911	ANXA11		ANXA11		annexin A11	Nucleus	other
	TC152588	NM_001139997	Salmo salar Annexin A11 (anx11) mRNA_x0001_gb-BT045034.1- Salmo salar clone ssal-rgf-510-144 Annexin A11 putative mRNA complete cds	1.52	3e-05	ANXA11		ANXA11		annexin A11	Nucleus	other
	TC146932	NM_001139997	Salmo salar Annexin A11 (anx11) mRNA_x0001_gb-BT045034.1- Salmo salar clone ssal-rgf-510-144 Annexin A11 putative mRNA complete cds	1.015	0.000426	ANXA11		ANXA11		annexin A11	Nucleus	other
	TC136881	tpg-BK001400.1-	TPA_exp: Oncorhynchus mykiss arginase type II (ARG02) mRNA complete cds	3.447	0	ARG2		ARG2	3.2625	arginase 2	Cytoplasm	enzyme
	TC160594	tpg-BK001404.1-	TPA_inf: Oncorhynchus mykiss arginase type IIb mRNA partial cds	3.078	0	ARG2		ARG2		arginase 2	Cytoplasm	enzyme
	TC136471	BT058997	Salmo salar clone ssal-rgf-518-332 Arrestin domain-containing protein 3 putative mRNA complete cds	2.81	1e-06	ARRDC3		ARRDC3	2.639	arrestin domain containing 3	Plasma Membrane	other
	TC144761	BT058997	Salmo salar clone ssal-rgf-518-332 Arrestin domain-containing protein 3 putative mRNA complete cds	2.684	0	ARRDC3		ARRDC3		arrestin domain containing 3	Plasma Membrane	other
	TC170028	BT058997	Salmo salar clone ssal-rgf-518-332 Arrestin domain-containing protein 3 putative mRNA complete cds	2.423	1e-06	ARRDC3		ARRDC3		arrestin domain containing 3	Plasma Membrane	other
	TC168156	NM_001124630	Oncorhynchus mykiss Na/K ATPase alpha subunit isoform 3 (atp1a3) mRNA_x0001_gb-AY319388.1- Oncorhynchus mykiss Na/K ATPase alpha subunit isoform 3 mRNA complete cds	1.872	0.00972	ATP1A3		ATP1A3	1.572	ATPase Na+/K+ transporting subunit alpha 3	Plasma Membrane	transporter
	TC153254	NM_001124630	Oncorhynchus mykiss Na/K ATPase alpha subunit isoform 3 (atp1a3) mRNA_x0001_gb-AY319388.1- Oncorhynchus mykiss Na/K ATPase alpha subunit isoform 3 mRNA complete cds	1.272	0.000195	ATP1A3		ATP1A3		ATPase Na+/K+ transporting subunit alpha 3	Plasma Membrane	transporter
	TC150484	BT059032	Salmo salar clone ssal-rgf-521-252 Sodium/potassium-transporting ATPase subunit beta-233 putative mRNA complete cds	3.804	0.04685	ATP1B1		ATP1B1	1.963	ATPase Na+/K+ transporting subunit beta 1	Plasma Membrane	transporter
	TC148965	BT059325	Salmo salar clone ssal-rgf-541-199 Sodium/potassium-transporting ATPase subunit beta-233 putative mRNA complete cds	1.595	4.7e-05	ATP1B1		ATP1B1		ATPase Na+/K+ transporting subunit beta 1	Plasma Membrane	transporter
	TC146386	BT059325	Salmo salar clone ssal-rgf-541-199 Sodium/potassium-transporting ATPase subunit beta-233 putative mRNA complete cds	1.436	5e-06	ATP1B1		ATP1B1		ATPase Na+/K+ transporting subunit beta 1	Plasma Membrane	transporter
	TC157701	BT059325	Salmo salar clone ssal-rgf-541-199 Sodium/potassium-transporting ATPase subunit beta-233 putative mRNA complete cds	1.017	0.00267	ATP1B1		ATP1B1		ATPase Na+/K+ transporting subunit beta 1	Plasma Membrane	transporter
	TC147786	BC171622	Danio rerio ATPase Ca++ transporting plasma membrane 1a mRNA (cDNA clone MGC:198349 IMAGE:9039338) complete cds	2.523	0	ATP2B1		ATP2B1	2.0735	ATPase plasma membrane Ca2+ transporting 1	Plasma Membrane	transporter
	TC143843	HM190262	Oncorhynchus mykiss plasma membrane Ca++ transporting ATPase 1 mRNA partial cds	1.624	0.012077	ATP2B1		ATP2B1		ATPase plasma membrane Ca2+ transporting 1	Plasma Membrane	transporter
	TC160933	not-annotated	not-annotated	-1.311	0.02772	ATRX		ATRX	-1.75	ATRX chromatin remodeler	Nucleus	transcription regulator
	TC166570	NM_200653	Danio rerio alpha thalassemia/mental retardation syndrome X-linked homolog (human) (atrx) mRNA	-2.189	0.000851	ATRX		ATRX		ATRX chromatin remodeler	Nucleus	transcription regulator
	TC150930	not-annotated	not-annotated	1.822	0.033107	BAG4		BAG4	1.6205	BAG cochaperone 4	Cytoplasm	other
	TC157004	NM_001123656	Salmo salar fast myotomal muscle tropomyosin (LOC100136562) mRNA_x0001_gb-L25609.1-SMOFMTRMYA Salmo salar fast myotomal muscle tropomyosin mRNA complete cds	1.419	0.000155	BAG4		BAG4		BAG cochaperone 4	Cytoplasm	other
	TC145194	BT045469	Salmo salar clone ssal-rgf-522-143 3-methyl-2-oxobutanoate dehydrogenase kinase mitochondrial precursor putative mRNA complete cds	1.887	1.2e-05	BCKDK		BCKDK	1.5515	branched chain keto acid dehydrogenase kinase	Cytoplasm	kinase
	TC138197	BT045469	Salmo salar clone ssal-rgf-522-143 3-methyl-2-oxobutanoate dehydrogenase kinase mitochondrial precursor putative mRNA complete cds	1.216	0.000313	BCKDK		BCKDK		branched chain keto acid dehydrogenase kinase	Cytoplasm	kinase
	TC171460	BT072239	Salmo salar clone ssal-rgf-518-009 Apoptosis facilitator Bcl-2-like protein 14 putative mRNA pseudogene cds	1.334	0.000121	BCL2L14		BCL2L14	1.3195	BCL2 like 14	Cytoplasm	other
	CUST_32_PI420312184	BT072239	Salmo salar clone ssal-rgf-518-009 Apoptosis facilitator Bcl-2-like protein 14 putative mRNA pseudogene cds	1.305	6.6e-05	BCL2L14		BCL2L14		BCL2 like 14	Cytoplasm	other
	TC170503	BT072728	Salmo salar clone ssal-rgf-538-095 B-cell lymphoma 3-encoded protein putative mRNA pseudogene cds	1.645	0.000119	BCL3		BCL3	1.6125	BCL3 transcription coactivator	Nucleus	transcription regulator
	TC160566	BT072728	Salmo salar clone ssal-rgf-538-095 B-cell lymphoma 3-encoded protein putative mRNA pseudogene cds	1.58	1.5e-05	BCL3		BCL3		BCL3 transcription coactivator	Nucleus	transcription regulator
	TC132860	NM_001140313	Salmo salar B-cell lymphoma 6 protein homolog (bcl6) mRNA_x0001_gb-BT045633.1- Salmo salar clone ssal-rgf-527-129 B-cell lymphoma 6 protein homolog putative mRNA complete cds	2.198	6e-06	BCL6		BCL6	1.4385	BCL6 transcription repressor	Nucleus	transcription regulator
	TC158857	NM_001140313	Salmo salar B-cell lymphoma 6 protein homolog (bcl6) mRNA_x0001_gb-BT045633.1- Salmo salar clone ssal-rgf-527-129 B-cell lymphoma 6 protein homolog putative mRNA complete cds	1.874	2.2e-05	BCL6		BCL6		BCL6 transcription repressor	Nucleus	transcription regulator
	IMM 28	NM_001140313	Salmo salar B-cell lymphoma 6 protein homolog (bcl6) mRNA_x0001_gb-BT045633.1- Salmo salar clone ssal-rgf-527-129 B-cell lymphoma 6 protein homolog putative mRNA complete cds	1.234	0.002739	BCL6		BCL6		BCL6 transcription repressor	Nucleus	transcription regulator
	IMM 28	NM_001140313	Salmo salar B-cell lymphoma 6 protein homolog (bcl6) mRNA_x0001_gb-BT045633.1- Salmo salar clone ssal-rgf-527-129 B-cell lymphoma 6 protein homolog putative mRNA complete cds	1.155	0.049598	BCL6		BCL6		BCL6 transcription repressor	Nucleus	transcription regulator
	IMM 28	NM_001140313	Salmo salar B-cell lymphoma 6 protein homolog (bcl6) mRNA_x0001_gb-BT045633.1- Salmo salar clone ssal-rgf-527-129 B-cell lymphoma 6 protein homolog putative mRNA complete cds	1.128	0.006823	BCL6		BCL6		BCL6 transcription repressor	Nucleus	transcription regulator
	IMM 28	NM_001140313	Salmo salar B-cell lymphoma 6 protein homolog (bcl6) mRNA_x0001_gb-BT045633.1- Salmo salar clone ssal-rgf-527-129 B-cell lymphoma 6 protein homolog putative mRNA complete cds	1.042	0.00437	BCL6		BCL6		BCL6 transcription repressor	Nucleus	transcription regulator
	TC168457	XM_002692033	PREDICTED: Bos taurus BTB (POZ) domain containing 3 (BTBD3) mRNA	-1.063	0.00068	BTBD3		BTBD3	-1.172	BTB domain containing 3	Other	other
	TC147269	NM_001024815	Danio rerio BTB (POZ) domain containing 6b (btbd6b) mRNA	-1.281	0.025783	BTBD3		BTBD3		BTB domain containing 3	Other	other
	IMM 635	BT045669	Salmo salar clone ssal-rgf-528-113 BTG1 putative mRNA complete cds	1.458	4e-06	BTG1		BTG1	1.243	BTG anti-proliferation factor 1	Nucleus	transcription regulator
	IMM 635	BT045669	Salmo salar clone ssal-rgf-528-113 BTG1 putative mRNA complete cds	1.228	2.1e-05	BTG1		BTG1		BTG anti-proliferation factor 1	Nucleus	transcription regulator
	IMM 635	BT045669	Salmo salar clone ssal-rgf-528-113 BTG1 putative mRNA complete cds	1.223	6.5e-05	BTG1		BTG1		BTG anti-proliferation factor 1	Nucleus	transcription regulator
	TC160072	BT045669	Salmo salar clone ssal-rgf-528-113 BTG1 putative mRNA complete cds	1.063	5.8e-05	BTG1		BTG1		BTG anti-proliferation factor 1	Nucleus	transcription regulator
	TC137224	BT045644	Salmo salar clone ssal-rgf-527-229 BTG2 putative mRNA complete cds	1.507	5e-06	BTG2		BTG2	1.43433	BTG anti-proliferation factor 2	Nucleus	transcription regulator
	TC135705	BT045644	Salmo salar clone ssal-rgf-527-229 BTG2 putative mRNA complete cds	1.491	8e-06	BTG2		BTG2		BTG anti-proliferation factor 2	Nucleus	transcription regulator
	TC154667	BT045644	Salmo salar clone ssal-rgf-527-229 BTG2 putative mRNA complete cds	1.305	3.4e-05	BTG2		BTG2		BTG anti-proliferation factor 2	Nucleus	transcription regulator
	TC156287	NM_001165080	Oncorhynchus mykiss B-cell translocation gene 3 (btg3) mRNA_x0001_gb-BT073824.1- Oncorhynchus mykiss clone omyk-evo-512-053 BTG3 protein putative mRNA complete cds	1.847	3e-06	BTG3		BTG3	1.50033	BTG anti-proliferation factor 3	Nucleus	other
	TC140952	NM_001141217	Salmo salar B-cell translocation gene 3 (btg3) mRNA_x0001_gb-BT048691.1- Salmo salar clone ssal-evf-575-286 BTG3 putative mRNA complete cds	1.372	0.000452	BTG3		BTG3		BTG anti-proliferation factor 3	Nucleus	other
	TC138039	EU723246	Oncorhynchus mykiss B-cell translocation gene 3 (btg3) mRNA complete cds	1.282	0.000451	BTG3		BTG3		BTG anti-proliferation factor 3	Nucleus	other
	TC151398	NM_001140339	Salmo salar potential DNA-binding protein C17orf49 homolog (cq049) mRNA_x0001_gb-BT045676.1- Salmo salar clone ssal-rgf-528-251 potential DNA-binding protein C17orf49 homolog putative mRNA complete cds	-1.18	0.001357	C17orf49		C17orf49	-1.221	chromosome 17 open reading frame 49	Nucleus	other
	TC143323	NM_001140339	Salmo salar potential DNA-binding protein C17orf49 homolog (cq049) mRNA_x0001_gb-BT045676.1- Salmo salar clone ssal-rgf-528-251 potential DNA-binding protein C17orf49 homolog putative mRNA complete cds	-1.262	0.000148	C17orf49		C17orf49		chromosome 17 open reading frame 49	Nucleus	other
	TC143148	BT125239	Salmo salar clone ssal-sjb-001-087 C1orf174 homolog putative mRNA complete cds	2.162	1e-06	C1orf174		C1orf174	2.095	chromosome 1 open reading frame 174	Nucleus	other
	TC139727	BT125239	Salmo salar clone ssal-sjb-001-087 C1orf174 homolog putative mRNA complete cds	2.028	2e-06	C1orf174		C1orf174		chromosome 1 open reading frame 174	Nucleus	other
	TC132404	AJ620466	Oncorhynchus mykiss mRNA for complement receptor-like protein 1 splice variant 2	1.771	5e-06	C4BPA		C4BPA	1.38	complement component 4 binding protein alpha	Extracellular Space	other
	IMM 448	AJ620465	Oncorhynchus mykiss mRNA for complement receptor-like protein 1 splice variant 1	1.537	0.000173	C4BPA		C4BPA		complement component 4 binding protein alpha	Extracellular Space	other
	IMM 449	AJ620466	Oncorhynchus mykiss mRNA for complement receptor-like protein 1 splice variant 2	1.387	0.002831	C4BPA		C4BPA		complement component 4 binding protein alpha	Extracellular Space	other
	IMM 448	AJ620465	Oncorhynchus mykiss mRNA for complement receptor-like protein 1 splice variant 1	1.357	0.000715	C4BPA		C4BPA		complement component 4 binding protein alpha	Extracellular Space	other
	IMM 448	AJ620465	Oncorhynchus mykiss mRNA for complement receptor-like protein 1 splice variant 1	1.314	0.000754	C4BPA		C4BPA		complement component 4 binding protein alpha	Extracellular Space	other
	TC132438	AJ620465	Oncorhynchus mykiss mRNA for complement receptor-like protein 1 splice variant 1	1.278	0.000277	C4BPA		C4BPA		complement component 4 binding protein alpha	Extracellular Space	other
	TC157575	AJ620466	Oncorhynchus mykiss mRNA for complement receptor-like protein 1 splice variant 2	1.253	0.001376	C4BPA		C4BPA		complement component 4 binding protein alpha	Extracellular Space	other
	IMM 449	AJ620466	Oncorhynchus mykiss mRNA for complement receptor-like protein 1 splice variant 2	1.143	0.001232	C4BPA		C4BPA		complement component 4 binding protein alpha	Extracellular Space	other
	TC149993	BT044890	Salmo salar clone ssal-rgf-506-272 Calcium/calmodulin-dependent protein kinase II inhibitor 2 putative mRNA complete cds	2.195	7e-06	CAMK2N2		CAMK2N2	1.967	calcium/calmodulin dependent protein kinase II inhibitor 2	Nucleus	other
	TC150224	BT044890	Salmo salar clone ssal-rgf-506-272 Calcium/calmodulin-dependent protein kinase II inhibitor 2 putative mRNA complete cds	1.739	0.005294	CAMK2N2		CAMK2N2		calcium/calmodulin dependent protein kinase II inhibitor 2	Nucleus	other
	IMM 491	AY542964	Oncorhynchus mykiss clone TrtCathGF0R0-6 cathelicidin-derived antimicrobial peptide 2 isoform A (CATH-2A) gene complete cds	2.833	0.000488	CAMP		CAMP	2.152	cathelicidin antimicrobial peptide	Cytoplasm	other
	IMM 687	NM_001123573	Salmo salar cathelicidin antimicrobial peptide (LOC100136439) mRNA_x0001_gb-AY360357.1- Salmo salar cathelicidin antimicrobial peptide mRNA complete cds	2.143	0.000662	CAMP		CAMP		cathelicidin antimicrobial peptide	Cytoplasm	other
	IMM 687	NM_001123573	Salmo salar cathelicidin antimicrobial peptide (LOC100136439) mRNA_x0001_gb-AY360357.1- Salmo salar cathelicidin antimicrobial peptide mRNA complete cds	1.901	0.001683	CAMP		CAMP		cathelicidin antimicrobial peptide	Cytoplasm	other
	IMM 687	NM_001123573	Salmo salar cathelicidin antimicrobial peptide (LOC100136439) mRNA_x0001_gb-AY360357.1- Salmo salar cathelicidin antimicrobial peptide mRNA complete cds	1.731	0.005835	CAMP		CAMP		cathelicidin antimicrobial peptide	Cytoplasm	other
	TC168463	NM_001165360	Salmo salar cancer susceptibility candidate 4 (casc4) mRNA_x0001_gb-BT058862.1- Salmo salar clone ssal-rgf-508-303 CASC4 putative mRNA complete cds	-1.073	0.000484	CASC4		GOLM2	-1.28	golgi membrane protein 2	Cytoplasm	other
	TC171241	NM_001165360	Salmo salar cancer susceptibility candidate 4 (casc4) mRNA_x0001_gb-BT058862.1- Salmo salar clone ssal-rgf-508-303 CASC4 putative mRNA complete cds	-1.487	3.6e-05	CASC4		GOLM2		golgi membrane protein 2	Cytoplasm	other
	TC172513	BT059055	Salmo salar clone ssal-rgf-522-352 Caspase-8 precursor putative mRNA complete cds	1.758	1e-05	CASP10		CASP10	1.727	caspase 10	Cytoplasm	peptidase
	TC169338	not-annotated	not-annotated	1.696	2e-06	CASP10		CASP10		caspase 10	Cytoplasm	peptidase
	TC156264	BT059055	Salmo salar clone ssal-rgf-522-352 Caspase-8 precursor putative mRNA complete cds	1.686	0.000453	CASP8		CASP8	1.662	caspase 8	Nucleus	peptidase
	TC133215	BT059055	Salmo salar clone ssal-rgf-522-352 Caspase-8 precursor putative mRNA complete cds	1.638	1e-06	CASP8		CASP8		caspase 8	Nucleus	peptidase
	TC142292	NM_001124686	Oncorhynchus mykiss cystathionine-beta-synthase (cbs) mRNA_x0001_gb-EU315112.1- Oncorhynchus mykiss cystathionine-beta-synthase mRNA complete cds	2.176	0.000852	CBS		CBS/CBSL	1.634	cystathionine beta-synthase	Cytoplasm	enzyme
	TC136765	NM_001124686	Oncorhynchus mykiss cystathionine-beta-synthase (cbs) mRNA_x0001_gb-EU315112.1- Oncorhynchus mykiss cystathionine-beta-synthase mRNA complete cds	1.092	0.037544	CBS		CBS/CBSL		cystathionine beta-synthase	Cytoplasm	enzyme
	TC145343	not-annotated	not-annotated	-1.001	0.00687	CCL14		CCL14	-1.16467	C-C motif chemokine ligand 14	Extracellular Space	cytokine
	IMM 1042	not-annotated	not-annotated	-1.076	0.003862	CCL14		CCL14		C-C motif chemokine ligand 14	Extracellular Space	cytokine
	IMM 1042	not-annotated	not-annotated	-1.108	0.001492	CCL14		CCL14		C-C motif chemokine ligand 14	Extracellular Space	cytokine
	IMM 377	not-annotated	not-annotated	-1.151	0.000675	CCL14		CCL14		C-C motif chemokine ligand 14	Extracellular Space	cytokine
	IMM 377	not-annotated	not-annotated	-1.267	0.000883	CCL14		CCL14		C-C motif chemokine ligand 14	Extracellular Space	cytokine
	IMM 377	not-annotated	not-annotated	-1.385	0.000296	CCL14		CCL14		C-C motif chemokine ligand 14	Extracellular Space	cytokine
	TC161755	BT074182	Oncorhynchus mykiss clone omyk-evo-506-271 Small inducible cytokine A4 precursor putative mRNA complete cds	1.499	0.002092	CCL3L3		CCL3L3	1.2545	C-C motif chemokine ligand 3 like 3	Extracellular Space	cytokine
	IMM 1047	BT074182	Oncorhynchus mykiss clone omyk-evo-506-271 Small inducible cytokine A4 precursor putative mRNA complete cds	1.01	0.006334	CCL3L3		CCL3L3		C-C motif chemokine ligand 3 like 3	Extracellular Space	cytokine
	IMM 65	NM_001160689	Oncorhynchus mykiss Small inducible cytokine A13 (ccl13) mRNA_x0001_gb-BT073669.1- Oncorhynchus mykiss clone omyk-evo-509-147 Small inducible cytokine A13 precursor putative mRNA complete cds	-1.004	0.005616	CCL7		CCL7	-1.023	C-C motif chemokine ligand 7	Extracellular Space	cytokine
	IMM 65	NM_001160689	Oncorhynchus mykiss Small inducible cytokine A13 (ccl13) mRNA_x0001_gb-BT073669.1- Oncorhynchus mykiss clone omyk-evo-509-147 Small inducible cytokine A13 precursor putative mRNA complete cds	-1.042	0.004258	CCL7		CCL7		C-C motif chemokine ligand 7	Extracellular Space	cytokine
	TC150472	NM_001140199	Salmo salar cyclin A2 (ccna2) mRNA_x0001_gb-BT045412.1- Salmo salar clone ssal-rgf-520-270 Cyclin-A2 putative mRNA complete cds	-1.038	0.004659	CCNA2		CCNA2	-1.08867	cyclin A2	Nucleus	other
	TC153680	NM_001140199	Salmo salar cyclin A2 (ccna2) mRNA_x0001_gb-BT045412.1- Salmo salar clone ssal-rgf-520-270 Cyclin-A2 putative mRNA complete cds	-1.048	0.009759	CCNA2		CCNA2		cyclin A2	Nucleus	other
	TC159163	NM_001140199	Salmo salar cyclin A2 (ccna2) mRNA_x0001_gb-BT045412.1- Salmo salar clone ssal-rgf-520-270 Cyclin-A2 putative mRNA complete cds	-1.18	0.035309	CCNA2		CCNA2		cyclin A2	Nucleus	other
	TC169917	BT048797	Salmo salar clone ssal-rgb2-604-311 G2/mitotic-specific cyclin-B1 putative mRNA complete cds	-1.041	0.000709	CCNB1		CCNB1	-1.215	cyclin B1	Cytoplasm	kinase
	TC133940	BT072533	Salmo salar clone ssal-rgf-529-095 G2/mitotic-specific cyclin-B1 putative mRNA pseudogene cds	-1.047	0.003782	CCNB1		CCNB1		cyclin B1	Cytoplasm	kinase
	TC132566	NM_001124658	Oncorhynchus mykiss cyclin B1 (LOC100136690) mRNA_x0001_gb-DQ888229.1- Oncorhynchus mykiss cyclin B1 mRNA complete cds	-1.209	0.048042	CCNB1		CCNB1		cyclin B1	Cytoplasm	kinase
	TC142979	BT048797	Salmo salar clone ssal-rgb2-604-311 G2/mitotic-specific cyclin-B1 putative mRNA complete cds	-1.563	7.9e-05	CCNB1		CCNB1		cyclin B1	Cytoplasm	kinase
	IMM 1018	NM_001124509	Oncorhynchus mykiss cyclin L1 (LOC100136245) mRNA_x0001_gb-AY606031.1- Oncorhynchus mykiss cyclin L1 mRNA complete cds	1.35	2.6e-05	CCNL1		CCNL1	1.274	cyclin L1	Nucleus	other
	IMM 1018	NM_001124509	Oncorhynchus mykiss cyclin L1 (LOC100136245) mRNA_x0001_gb-AY606031.1- Oncorhynchus mykiss cyclin L1 mRNA complete cds	1.254	5.9e-05	CCNL1		CCNL1		cyclin L1	Nucleus	other
	TC142197	NM_001124509	Oncorhynchus mykiss cyclin L1 (LOC100136245) mRNA_x0001_gb-AY606031.1- Oncorhynchus mykiss cyclin L1 mRNA complete cds	1.218	0.00021	CCNL1		CCNL1		cyclin L1	Nucleus	other
	IMM 100	BT045872	Salmo salar clone ssal-rgf-535-127 C-C chemokine receptor type 9 putative mRNA complete cds	1.523	0.003568	CCR9		CCR9	1.3412	C-C motif chemokine receptor 9	Plasma Membrane	G-protein coupled receptor
	IMM 99	BT082726	Anoplopoma fimbria clone afim-evh-534-304 C-C chemokine receptor type 9 putative mRNA complete cds	1.516	0.00025	CCR9		CCR9		C-C motif chemokine receptor 9	Plasma Membrane	G-protein coupled receptor
	IMM 100	BT045872	Salmo salar clone ssal-rgf-535-127 C-C chemokine receptor type 9 putative mRNA complete cds	1.505	0.003504	CCR9		CCR9		C-C motif chemokine receptor 9	Plasma Membrane	G-protein coupled receptor
	TC140267	NM_001124610	Oncorhynchus mykiss chemokine receptor (ccr9) mRNA_x0001_emb-AJ003159.1- Oncorhynchus mykiss mRNA for a chemokine receptor homolog	1.485	0.000231	CCR9		CCR9		C-C motif chemokine receptor 9	Plasma Membrane	G-protein coupled receptor
	IMM 878	NM_001124610	Oncorhynchus mykiss chemokine receptor (ccr9) mRNA_x0001_emb-AJ003159.1- Oncorhynchus mykiss mRNA for a chemokine receptor homolog	1.48	0.000702	CCR9		CCR9		C-C motif chemokine receptor 9	Plasma Membrane	G-protein coupled receptor
	IMM 99	BT082726	Anoplopoma fimbria clone afim-evh-534-304 C-C chemokine receptor type 9 putative mRNA complete cds	1.396	0.001037	CCR9		CCR9		C-C motif chemokine receptor 9	Plasma Membrane	G-protein coupled receptor
	IMM 576	NM_001124610	Oncorhynchus mykiss chemokine receptor (ccr9) mRNA_x0001_emb-AJ003159.1- Oncorhynchus mykiss mRNA for a chemokine receptor homolog	1.369	0.001331	CCR9		CCR9		C-C motif chemokine receptor 9	Plasma Membrane	G-protein coupled receptor
	IMM 878	NM_001124610	Oncorhynchus mykiss chemokine receptor (ccr9) mRNA_x0001_emb-AJ003159.1- Oncorhynchus mykiss mRNA for a chemokine receptor homolog	1.336	0.001743	CCR9		CCR9		C-C motif chemokine receptor 9	Plasma Membrane	G-protein coupled receptor
	IMM 576	NM_001124610	Oncorhynchus mykiss chemokine receptor (ccr9) mRNA_x0001_emb-AJ003159.1- Oncorhynchus mykiss mRNA for a chemokine receptor homolog	1.325	0.003005	CCR9		CCR9		C-C motif chemokine receptor 9	Plasma Membrane	G-protein coupled receptor
	IMM 100	BT045872	Salmo salar clone ssal-rgf-535-127 C-C chemokine receptor type 9 putative mRNA complete cds	1.276	0.007943	CCR9		CCR9		C-C motif chemokine receptor 9	Plasma Membrane	G-protein coupled receptor
	IMM 100	BT045872	Salmo salar clone ssal-rgf-535-127 C-C chemokine receptor type 9 putative mRNA complete cds	1.266	0.007952	CCR9		CCR9		C-C motif chemokine receptor 9	Plasma Membrane	G-protein coupled receptor
	IMM 99	BT082726	Anoplopoma fimbria clone afim-evh-534-304 C-C chemokine receptor type 9 putative mRNA complete cds	1.265	0.001844	CCR9		CCR9		C-C motif chemokine receptor 9	Plasma Membrane	G-protein coupled receptor
	TC139672	BT082726	Anoplopoma fimbria clone afim-evh-534-304 C-C chemokine receptor type 9 putative mRNA complete cds	1.228	0.003869	CCR9		CCR9		C-C motif chemokine receptor 9	Plasma Membrane	G-protein coupled receptor
	IMM 878	NM_001124610	Oncorhynchus mykiss chemokine receptor (ccr9) mRNA_x0001_emb-AJ003159.1- Oncorhynchus mykiss mRNA for a chemokine receptor homolog	1.137	0.004443	CCR9		CCR9		C-C motif chemokine receptor 9	Plasma Membrane	G-protein coupled receptor
	IMM 576	NM_001124610	Oncorhynchus mykiss chemokine receptor (ccr9) mRNA_x0001_emb-AJ003159.1- Oncorhynchus mykiss mRNA for a chemokine receptor homolog	1.011	0.005834	CCR9		CCR9		C-C motif chemokine receptor 9	Plasma Membrane	G-protein coupled receptor
	TC134179	GU817336	Salmo salar clone BAC CHORI214-109F19 complete sequence	3.642	2e-06	CCRN4L		NOCT	3.115	nocturnin	Nucleus	transcription regulator
	TC142012	CR677175	Tetraodon nigroviridis full-length cDNA	3.333	0	CCRN4L		NOCT		nocturnin	Nucleus	transcription regulator
	TC136356	not-annotated	not-annotated	2.37	1e-06	CCRN4L		NOCT		nocturnin	Nucleus	transcription regulator
	IMM 30	not-annotated	not-annotated	1.349	0.012085	CD22		CD22	1.196	CD22 molecule	Plasma Membrane	cell surface receptor
	IMM 30	not-annotated	not-annotated	1.143	0.014834	CD22		CD22		CD22 molecule	Plasma Membrane	cell surface receptor
	IMM 30	not-annotated	not-annotated	1.096	0.010664	CD22		CD22		CD22 molecule	Plasma Membrane	cell surface receptor
	TC142281	NM_001124378	Oncorhynchus mykiss tumour necrosis factor receptor (tnfr) mRNA_x0001_emb-AJ517804.1- Oncorhynchus mykiss mRNA for tumour necrosis factor receptor (tnfr gene)	2.249	0.032671	CD40		CD40	1.57775	CD40 molecule	Plasma Membrane	cell surface receptor
	IMM 933	NM_001124378	Oncorhynchus mykiss tumour necrosis factor receptor (tnfr) mRNA_x0001_emb-AJ517804.1- Oncorhynchus mykiss mRNA for tumour necrosis factor receptor (tnfr gene)	1.492	9e-06	CD40		CD40		CD40 molecule	Plasma Membrane	cell surface receptor
	IMM 933	NM_001124378	Oncorhynchus mykiss tumour necrosis factor receptor (tnfr) mRNA_x0001_emb-AJ517804.1- Oncorhynchus mykiss mRNA for tumour necrosis factor receptor (tnfr gene)	1.314	7.5e-05	CD40		CD40		CD40 molecule	Plasma Membrane	cell surface receptor
	IMM 933	NM_001124378	Oncorhynchus mykiss tumour necrosis factor receptor (tnfr) mRNA_x0001_emb-AJ517804.1- Oncorhynchus mykiss mRNA for tumour necrosis factor receptor (tnfr gene)	1.256	3.4e-05	CD40		CD40		CD40 molecule	Plasma Membrane	cell surface receptor
	TC150168	not-annotated	not-annotated	2.977	5.7e-05	CD55		CD55	2.2365	CD55 molecule (Cromer blood group)	Plasma Membrane	other
	TC132338	NM_001124404	Oncorhynchus mykiss complement receptor-like (LOC100136105) mRNA_x0001_emb-AJ620464.1- Oncorhynchus mykiss mRNA for complement receptor-like protein 1	1.496	0.000437	CD55		CD55		CD55 molecule (Cromer blood group)	Plasma Membrane	other
	TC134971	BT060007	Salmo salar clone ssal-rgg-515-376 Cytidine deaminase putative mRNA complete cds	2.75	7e-06	CDA		CDA	2.1265	cytidine deaminase	Nucleus	enzyme
	TC142862	BC164938	Danio rerio zgc:103586 mRNA (cDNA clone MGC:192113 IMAGE:100060422) complete cds	1.503	4.5e-05	CDA		CDA		cytidine deaminase	Nucleus	enzyme
	TC151189	BT045418	Salmo salar clone ssal-rgf-520-363 Cyclin-dependent kinase 2-associated protein 2 putative mRNA complete cds	1.762	0.000522	CDK2AP2		CDK2AP2	1.5355	cyclin dependent kinase 2 associated protein 2	Nucleus	other
	TC154511	BT045418	Salmo salar clone ssal-rgf-520-363 Cyclin-dependent kinase 2-associated protein 2 putative mRNA complete cds	1.309	0.028066	CDK2AP2		CDK2AP2		cyclin dependent kinase 2 associated protein 2	Nucleus	other
	TC145234	BT045521	Salmo salar clone ssal-rgf-524-002 Cyclin-dependent kinase inhibitor 1B putative mRNA complete cds	1.998	5e-06	CDKN1B		CDKN1B	1.5355	cyclin dependent kinase inhibitor 1B	Nucleus	kinase
	TC156806	BT045521	Salmo salar clone ssal-rgf-524-002 Cyclin-dependent kinase inhibitor 1B putative mRNA complete cds	1.073	0.001609	CDKN1B		CDKN1B		cyclin dependent kinase inhibitor 1B	Nucleus	kinase
	TC135891	BT057714	Salmo salar clone ssal-eve-544-375 Cyclin-dependent kinase inhibitor 1C putative mRNA complete cds	1.457	0.006375	CDKN1C		CDKN1C	1.418	cyclin dependent kinase inhibitor 1C	Nucleus	other
	TC137508	BT057714	Salmo salar clone ssal-eve-544-375 Cyclin-dependent kinase inhibitor 1C putative mRNA complete cds	1.379	0.015132	CDKN1C		CDKN1C		cyclin dependent kinase inhibitor 1C	Nucleus	other
	IMM 988	NM_001124447	Oncorhynchus mykiss CCAAT/enhancer-binding protein beta (LOC100136165) mRNA_x0001_gb-AY144611.1- Oncorhynchus mykiss CCAAT/enhancer-binding protein beta mRNA complete cds	3.796	0	CEBPB		CEBPB	3.0305	CCAAT enhancer binding protein beta	Nucleus	transcription regulator
	IMM 988	NM_001124447	Oncorhynchus mykiss CCAAT/enhancer-binding protein beta (LOC100136165) mRNA_x0001_gb-AY144611.1- Oncorhynchus mykiss CCAAT/enhancer-binding protein beta mRNA complete cds	3.751	0	CEBPB		CEBPB		CCAAT enhancer binding protein beta	Nucleus	transcription regulator
	IMM 988	NM_001124447	Oncorhynchus mykiss CCAAT/enhancer-binding protein beta (LOC100136165) mRNA_x0001_gb-AY144611.1- Oncorhynchus mykiss CCAAT/enhancer-binding protein beta mRNA complete cds	3.716	0	CEBPB		CEBPB		CCAAT enhancer binding protein beta	Nucleus	transcription regulator
	TC166107	NM_001124447	Oncorhynchus mykiss CCAAT/enhancer-binding protein beta (LOC100136165) mRNA_x0001_gb-AY144611.1- Oncorhynchus mykiss CCAAT/enhancer-binding protein beta mRNA complete cds	3.673	0	CEBPB		CEBPB		CCAAT enhancer binding protein beta	Nucleus	transcription regulator
	TC135368	NM_001172498	Oncorhynchus mykiss CCAAT/enhancer binding protein beta2 (LOC100379112) mRNA_x0001_gb-DQ423470.1- Oncorhynchus mykiss CCAAT/enhancer binding protein beta2 mRNA complete cds	3.58	0	CEBPB		CEBPB		CCAAT enhancer binding protein beta	Nucleus	transcription regulator
	IMM 481	AY283059	Oncorhynchus mykiss CCAAT/enhancer binding protein beta (C/EBPbeta) gene complete cds	2.739	0	CEBPB		CEBPB		CCAAT enhancer binding protein beta	Nucleus	transcription regulator
	IMM 67	NM_001172498	Oncorhynchus mykiss CCAAT/enhancer binding protein beta2 (LOC100379112) mRNA_x0001_gb-DQ423470.1- Oncorhynchus mykiss CCAAT/enhancer binding protein beta2 mRNA complete cds	2.673	0	CEBPB		CEBPB		CCAAT enhancer binding protein beta	Nucleus	transcription regulator
	IMM 481	AY283059	Oncorhynchus mykiss CCAAT/enhancer binding protein beta (C/EBPbeta) gene complete cds	2.622	0	CEBPB		CEBPB		CCAAT enhancer binding protein beta	Nucleus	transcription regulator
	IMM 481	AY283059	Oncorhynchus mykiss CCAAT/enhancer binding protein beta (C/EBPbeta) gene complete cds	2.534	0	CEBPB		CEBPB		CCAAT enhancer binding protein beta	Nucleus	transcription regulator
	IMM 67	NM_001172498	Oncorhynchus mykiss CCAAT/enhancer binding protein beta2 (LOC100379112) mRNA_x0001_gb-DQ423470.1- Oncorhynchus mykiss CCAAT/enhancer binding protein beta2 mRNA complete cds	2.435	0	CEBPB		CEBPB		CCAAT enhancer binding protein beta	Nucleus	transcription regulator
	IMM 67	NM_001172498	Oncorhynchus mykiss CCAAT/enhancer binding protein beta2 (LOC100379112) mRNA_x0001_gb-DQ423470.1- Oncorhynchus mykiss CCAAT/enhancer binding protein beta2 mRNA complete cds	2.43	0	CEBPB		CEBPB		CCAAT enhancer binding protein beta	Nucleus	transcription regulator
	IMM 67	NM_001172498	Oncorhynchus mykiss CCAAT/enhancer binding protein beta2 (LOC100379112) mRNA_x0001_gb-DQ423470.1- Oncorhynchus mykiss CCAAT/enhancer binding protein beta2 mRNA complete cds	2.417	0	CEBPB		CEBPB		CCAAT enhancer binding protein beta	Nucleus	transcription regulator
	TC147872	BT057758	Salmo salar clone ssal-evd-501-089 CCAAT/enhancer-binding protein delta putative mRNA complete cds	1.925	2e-06	CEBPD		CEBPD	1.2368	CCAAT enhancer binding protein delta	Nucleus	transcription regulator
	IMM 68	NM_001160641	Oncorhynchus mykiss CCAAT/enhancer binding protein (C/EBP) delta (cebpd) mRNA_x0001_gb-BT073476.1- Oncorhynchus mykiss clone omyk-evn-504-006 CCAAT/enhancer-binding protein delta putative mRNA complete cds	1.148	0.000288	CEBPD		CEBPD		CCAAT enhancer binding protein delta	Nucleus	transcription regulator
	IMM 68	NM_001160641	Oncorhynchus mykiss CCAAT/enhancer binding protein (C/EBP) delta (cebpd) mRNA_x0001_gb-BT073476.1- Oncorhynchus mykiss clone omyk-evn-504-006 CCAAT/enhancer-binding protein delta putative mRNA complete cds	1.063	0.000963	CEBPD		CEBPD		CCAAT enhancer binding protein delta	Nucleus	transcription regulator
	TC132637	NM_001160641	Oncorhynchus mykiss CCAAT/enhancer binding protein (C/EBP) delta (cebpd) mRNA_x0001_gb-BT073476.1- Oncorhynchus mykiss clone omyk-evn-504-006 CCAAT/enhancer-binding protein delta putative mRNA complete cds	1.045	0.000758	CEBPD		CEBPD		CCAAT enhancer binding protein delta	Nucleus	transcription regulator
	IMM 68	NM_001160641	Oncorhynchus mykiss CCAAT/enhancer binding protein (C/EBP) delta (cebpd) mRNA_x0001_gb-BT073476.1- Oncorhynchus mykiss clone omyk-evn-504-006 CCAAT/enhancer-binding protein delta putative mRNA complete cds	1.003	0.001869	CEBPD		CEBPD		CCAAT enhancer binding protein delta	Nucleus	transcription regulator
	TC133394	NM_199628	Danio rerio LAG1 homolog ceramide synthase 5 (S. cerevisiae) (lass5) mRNA_x0001_gb-BC053143.1- Danio rerio LAG1 homolog ceramide synthase 5 (S. cerevisiae) mRNA (cDNA clone MGC:63908 IMAGE:6790306) complete cds	1.561	6e-06	CERS5		CERS5	1.55	ceramide synthase 5	Cytoplasm	transcription regulator
	TC139202	BT027442	Gasterosteus aculeatus clone CFW280-G07 mRNA sequence	1.539	3e-06	CERS5		CERS5		ceramide synthase 5	Cytoplasm	transcription regulator
	IMM 781	AF089860	Oncorhynchus mykiss complement factor Bf-2 mRNA partial cds	-1.242	0.003029	CFB		CFB	-1.51	complement factor B	Extracellular Space	peptidase
	IMM 781	AF089860	Oncorhynchus mykiss complement factor Bf-2 mRNA partial cds	-1.371	0.000863	CFB		CFB		complement factor B	Extracellular Space	peptidase
	IMM 128	AF089860	Oncorhynchus mykiss complement factor Bf-2 mRNA partial cds	-1.435	0.002812	CFB		CFB		complement factor B	Extracellular Space	peptidase
	IMM 128	AF089860	Oncorhynchus mykiss complement factor Bf-2 mRNA partial cds	-1.443	0.000496	CFB		CFB		complement factor B	Extracellular Space	peptidase
	IMM 781	AF089860	Oncorhynchus mykiss complement factor Bf-2 mRNA partial cds	-1.623	0.000601	CFB		CFB		complement factor B	Extracellular Space	peptidase
	IMM 128	AF089860	Oncorhynchus mykiss complement factor Bf-2 mRNA partial cds	-1.639	0.001137	CFB		CFB		complement factor B	Extracellular Space	peptidase
	IMM 128	AF089860	Oncorhynchus mykiss complement factor Bf-2 mRNA partial cds	-1.646	0.000723	CFB		CFB		complement factor B	Extracellular Space	peptidase
	TC133465	AF089860	Oncorhynchus mykiss complement factor Bf-2 mRNA partial cds	-1.681	0.000323	CFB		CFB		complement factor B	Extracellular Space	peptidase
	CUST_5_PI425348775	M17	0	1.594	0.000101	CFT1		-	1.5615	-	-	-
	CUST_5_PI425348775	M17	0	1.529	3e-05	CFT1		-		-	-	-
	TC133143	NM_001140335	Salmo salar ChaC cation transport regulator-like 1 (chac1) mRNA_x0001_gb-BT045671.1- Salmo salar clone ssal-rgf-528-175 Cation transport regulator-like protein 1 putative mRNA complete cds	1.62	9e-06	CHAC1		CHAC1	1.4345	ChaC glutathione specific gamma-glutamylcyclotransferase 1	Cytoplasm	enzyme
	TC147210	BT060254	Salmo salar clone ssal-rgh-511-072 Cation transport regulator-like protein 1 putative mRNA complete cds	1.249	4.3e-05	CHAC1		CHAC1		ChaC glutathione specific gamma-glutamylcyclotransferase 1	Cytoplasm	enzyme
	TC153071	BT049734	Salmo salar clone ssal-sjb-006-351 Mitochondrial intermembrane space import and assembly protein 40 putative mRNA complete cds	1.194	0.002609	CHCHD4		CHCHD4	1.1795	coiled-coil-helix-coiled-coil-helix domain containing 4	Cytoplasm	enzyme
	TC145523	BT049734	Salmo salar clone ssal-sjb-006-351 Mitochondrial intermembrane space import and assembly protein 40 putative mRNA complete cds	1.165	0.00027	CHCHD4		CHCHD4		coiled-coil-helix-coiled-coil-helix domain containing 4	Cytoplasm	enzyme
	TC154814	BT050401	Salmo salar clone ssal-rgf-522-184 Cold-inducible RNA-binding protein putative mRNA complete cds	2.76	0.004869	CIRBP		CIRBP	2.0695	cold inducible RNA binding protein	Nucleus	translation regulator
	TC144472	BT059171	Salmo salar clone ssal-rgf-529-373 Cold-inducible RNA-binding protein putative mRNA complete cds	1.379	1.3e-05	CIRBP		CIRBP		cold inducible RNA binding protein	Nucleus	translation regulator
	TC156959	BT059296	Salmo salar clone ssal-rgf-539-349 Cbp/p300-interacting transactivator 2 putative mRNA complete cds	1.52	0.000109	CITED2		CITED2	1.3695	Cbp/p300 interacting transactivator with Glu/Asp rich carboxy-terminal domain 2	Nucleus	transcription regulator
	TC149404	NM_001141711	Salmo salar Cbp/p300-interacting transactivator 2 (cite2) mRNA_x0001_gb-BT044666.1- Salmo salar clone ssal-rgf-002-160 Cbp/p300-interacting transactivator 2 putative mRNA complete cds	1.219	0.000149	CITED2		CITED2		Cbp/p300 interacting transactivator with Glu/Asp rich carboxy-terminal domain 2	Nucleus	transcription regulator
	TC169672	NM_001139716	Salmo salar creatine kinase-2 (ckm2) mRNA_x0001_gb-BT043799.1- Salmo salar clone HM4_0584 creatine kinase-2 (ckm2) mRNA complete cds	-3.098	0.048483	CKM		CKM	-4.4805	creatine kinase, M-type	Cytoplasm	kinase
	TC167051	BT043801	Salmo salar clone HM5_0991 creatine kinase-3 (ckm3) mRNA complete cds	-5.863	0.018544	CKM		CKM		creatine kinase, M-type	Cytoplasm	kinase
	IMM 39	NM_001160495	Oncorhynchus mykiss C type lectin receptor B (LOC100301666) mRNA_x0001_gb-FJ607865.1- Oncorhynchus mykiss C type lectin receptor B mRNA complete cds	1.301	4.3e-05	CLEC4E		CLEC4E	1.207	C-type lectin domain family 4 member E	Plasma Membrane	other
	TC142412	NM_001160495	Oncorhynchus mykiss C type lectin receptor B (LOC100301666) mRNA_x0001_gb-FJ607865.1- Oncorhynchus mykiss C type lectin receptor B mRNA complete cds	1.113	0.000847	CLEC4E		CLEC4E		C-type lectin domain family 4 member E	Plasma Membrane	other
	TC154555	NM_001140055	Salmo salar Dual specificity protein kinase CLK4 (clk4) mRNA_x0001_gb-BT045149.1- Salmo salar clone ssal-rgf-513-172 Dual specificity protein kinase CLK4 putative mRNA complete cds	-1.015	0.001167	CLK4		CLK4	-1.647	CDC like kinase 4	Nucleus	kinase
	TC156060	BT072211	Salmo salar clone ssal-rgf-517-018 Dual specificity protein kinase CLK4 putative mRNA pseudogene cds	-2.279	0.046884	CLK4		CLK4		CDC like kinase 4	Nucleus	kinase
	TC147168	BT074452	Osmerus mordax clone omor-rgc-518-339 Chemokine receptor-like 1 putative mRNA complete cds	1.592	5e-06	CMKLR1		CMKLR1	1.249	chemerin chemokine-like receptor 1	Plasma Membrane	G-protein coupled receptor
	TC163230	NM_001124406	Oncorhynchus mykiss chemokine receptor-like protein 1 (LOC100136107) mRNA_x0001_emb-AJ620468.1- Oncorhynchus mykiss mRNA for chemokine receptor-like protein 1	1.548	0.00015	CMKLR1		CMKLR1		chemerin chemokine-like receptor 1	Plasma Membrane	G-protein coupled receptor
	IMM 96	BT074452	Osmerus mordax clone omor-rgc-518-339 Chemokine receptor-like 1 putative mRNA complete cds	1.28	3e-05	CMKLR1		CMKLR1		chemerin chemokine-like receptor 1	Plasma Membrane	G-protein coupled receptor
	IMM 96	BT074452	Osmerus mordax clone omor-rgc-518-339 Chemokine receptor-like 1 putative mRNA complete cds	1.246	0.000119	CMKLR1		CMKLR1		chemerin chemokine-like receptor 1	Plasma Membrane	G-protein coupled receptor
	IMM 111	NM_001124406	Oncorhynchus mykiss chemokine receptor-like protein 1 (LOC100136107) mRNA_x0001_emb-AJ620468.1- Oncorhynchus mykiss mRNA for chemokine receptor-like protein 1	1.233	0.021996	CMKLR1		CMKLR1		chemerin chemokine-like receptor 1	Plasma Membrane	G-protein coupled receptor
	IMM 96	BT074452	Osmerus mordax clone omor-rgc-518-339 Chemokine receptor-like 1 putative mRNA complete cds	1.204	0.000823	CMKLR1		CMKLR1		chemerin chemokine-like receptor 1	Plasma Membrane	G-protein coupled receptor
	IMM 451	NM_001124406	Oncorhynchus mykiss chemokine receptor-like protein 1 (LOC100136107) mRNA_x0001_emb-AJ620468.1- Oncorhynchus mykiss mRNA for chemokine receptor-like protein 1	1.189	0.007346	CMKLR1		CMKLR1		chemerin chemokine-like receptor 1	Plasma Membrane	G-protein coupled receptor
	IMM 96	BT074452	Osmerus mordax clone omor-rgc-518-339 Chemokine receptor-like 1 putative mRNA complete cds	1.104	0.000707	CMKLR1		CMKLR1		chemerin chemokine-like receptor 1	Plasma Membrane	G-protein coupled receptor
	IMM 451	NM_001124406	Oncorhynchus mykiss chemokine receptor-like protein 1 (LOC100136107) mRNA_x0001_emb-AJ620468.1- Oncorhynchus mykiss mRNA for chemokine receptor-like protein 1	1.076	0.006459	CMKLR1		CMKLR1		chemerin chemokine-like receptor 1	Plasma Membrane	G-protein coupled receptor
	IMM 111	NM_001124406	Oncorhynchus mykiss chemokine receptor-like protein 1 (LOC100136107) mRNA_x0001_emb-AJ620468.1- Oncorhynchus mykiss mRNA for chemokine receptor-like protein 1	1.018	0.031395	CMKLR1		CMKLR1		chemerin chemokine-like receptor 1	Plasma Membrane	G-protein coupled receptor
	TC158293	BT050295	Salmo salar clone ssal-eve-546-232 Cornifelin homolog A putative mRNA complete cds	-1.164	0.00015	CNFN		CNFN	-1.24567	cornifelin	Cytoplasm	other
	TC147159	GU129140	Salmo salar IgH locus B genomic sequence	-1.285	7.4e-05	CNFN		CNFN		cornifelin	Cytoplasm	other
	TC152567	BT050295	Salmo salar clone ssal-eve-546-232 Cornifelin homolog A putative mRNA complete cds	-1.288	0.000401	CNFN		CNFN		cornifelin	Cytoplasm	other
	IMM 827	AF281349	Oncorhynchus mykiss C-type lectin 2-1 mRNA partial cds	1.225	0.000129	COLEC12		COLEC12	1.119	collectin subfamily member 12	Plasma Membrane	cell surface receptor
	IMM 827	AF281349	Oncorhynchus mykiss C-type lectin 2-1 mRNA partial cds	1.091	0.000223	COLEC12		COLEC12		collectin subfamily member 12	Plasma Membrane	cell surface receptor
	IMM 827	AF281349	Oncorhynchus mykiss C-type lectin 2-1 mRNA partial cds	1.041	0.001731	COLEC12		COLEC12		collectin subfamily member 12	Plasma Membrane	cell surface receptor
	TC155991	NM_001017747	Danio rerio coenzyme Q10 homolog B (S. cerevisiae) (coq10b) nuclear gene encoding mitochondrial protein mRNA_x0001_gb-BC093204.1- Danio rerio coenzyme Q10 homolog B (S. cerevisiae) mRNA (cDNA clone MGC:112103 IMAGE:7420187) complete cds	1.981	0.041854	COQ10B		COQ10B	1.68767	coenzyme Q10B	Cytoplasm	other
	TC156295	BT047909	Salmo salar clone ssal-rgb-553-237 Probable protein COQ10 mitochondrial precursor putative mRNA complete cds	1.947	1e-06	COQ10B		COQ10B		coenzyme Q10B	Cytoplasm	other
	TC142890	BT047909	Salmo salar clone ssal-rgb-553-237 Probable protein COQ10 mitochondrial precursor putative mRNA complete cds	1.135	0.000169	COQ10B		COQ10B		coenzyme Q10B	Cytoplasm	other
	TC135643	BT125515	Salmo salar clone ssal-plnb-502-301 Cytochrome c oxidase subunit VIb isoform 1 putative mRNA complete cds	3.511	0.004875	COX6B1		COX6B1	2.791	cytochrome c oxidase subunit 6B1	Cytoplasm	enzyme
	TC163999	BT047910	Salmo salar clone ssal-evf-518-026 Cytochrome c oxidase subunit VIb isoform 1 putative mRNA complete cds	2.071	0.028537	COX6B1		COX6B1		cytochrome c oxidase subunit 6B1	Cytoplasm	enzyme
	IMM 144	BX901976	Zebrafish DNA sequence from clone DKEY-101P20 in linkage group 22 complete sequence	1.177	0.013316	CREBBP		CREBBP	1.13033	CREB binding protein	Nucleus	transcription regulator
	IMM 144	BX901976	Zebrafish DNA sequence from clone DKEY-101P20 in linkage group 22 complete sequence	1.119	0.003181	CREBBP		CREBBP		CREB binding protein	Nucleus	transcription regulator
	IMM 144	BX901976	Zebrafish DNA sequence from clone DKEY-101P20 in linkage group 22 complete sequence	1.095	0.006149	CREBBP		CREBBP		CREB binding protein	Nucleus	transcription regulator
	TC146008	U19370	Oncorhynchus tschawytscha heat shock protein 30 (HSP30) mRNA complete cds	3.91	1e-06	CRYAB		CRYAB	1.9545	crystallin alpha B	Nucleus	other
	TC142591	BT043748	Salmo salar clone HM6_0729 heat-shock protein 30-like mRNA complete cds	2.23	3.4e-05	CRYAB		CRYAB		crystallin alpha B	Nucleus	other
	TC149958	BT049609	Salmo salar clone ssal-evd-530-172 Heat shock protein beta-11 putative mRNA complete cds	1.785	0.001357	CRYAB		CRYAB		crystallin alpha B	Nucleus	other
	IMM 215	BT049609	Salmo salar clone ssal-evd-530-172 Heat shock protein beta-11 putative mRNA complete cds	1.781	0.000148	CRYAB		CRYAB		crystallin alpha B	Nucleus	other
	IMM 215	BT049609	Salmo salar clone ssal-evd-530-172 Heat shock protein beta-11 putative mRNA complete cds	1.735	0.000321	CRYAB		CRYAB		crystallin alpha B	Nucleus	other
	IMM 215	BT049609	Salmo salar clone ssal-evd-530-172 Heat shock protein beta-11 putative mRNA complete cds	1.685	0.000168	CRYAB		CRYAB		crystallin alpha B	Nucleus	other
	TC152109	NM_001139610	Salmo salar small heat shock protein-like (hspb6l) mRNA_x0001_gb-BT043544.1- Salmo salar clone HM4_1922 small heat shock protein-like (hspb6l) mRNA complete cds	1.384	0.000346	CRYAB		CRYAB		crystallin alpha B	Nucleus	other
	TC134312	BT125509	Salmo salar clone ssal-eve-572-377 Heat shock protein beta-11 putative mRNA complete cds	1.126	0.00066	CRYAB		CRYAB		crystallin alpha B	Nucleus	other
	TC172275	BT046095	Salmo salar clone ssal-rgf-541-203 Carboxy-terminal domain RNA polymerase II polypeptide A small phosphatase 2 putative mRNA complete cds	-1.28	0.003158	CTDSP2		CTDSP2	-1.42775	CTD small phosphatase 2	Nucleus	phosphatase
	TC156374	BT046072	Salmo salar clone ssal-rgf-540-375 Carboxy-terminal domain RNA polymerase II polypeptide A small phosphatase 2 putative mRNA complete cds	-1.345	5.4e-05	CTDSP2		CTDSP2		CTD small phosphatase 2	Nucleus	phosphatase
	TC166600	BT059332	Salmo salar clone ssal-rgf-541-370 Carboxy-terminal domain RNA polymerase II polypeptide A small phosphatase 2 putative mRNA complete cds	-1.502	0.000276	CTDSP2		CTDSP2		CTD small phosphatase 2	Nucleus	phosphatase
	TC161327	BT059332	Salmo salar clone ssal-rgf-541-370 Carboxy-terminal domain RNA polymerase II polypeptide A small phosphatase 2 putative mRNA complete cds	-1.584	5e-06	CTDSP2		CTDSP2		CTD small phosphatase 2	Nucleus	phosphatase
	IMM 585	NM_001195170	Oncorhynchus mykiss IL-6 subfamily cytokine M17 (m17) mRNA_x0001_emb-FM866398.1- Oncorhynchus mykiss mRNA for IL-6 subfamily member M17 (m17 gene)	1.615	7e-06	CTF1		CTF1	1.43733	cardiotrophin 1	Extracellular Space	cytokine
	IMM 585	NM_001195170	Oncorhynchus mykiss IL-6 subfamily cytokine M17 (m17) mRNA_x0001_emb-FM866398.1- Oncorhynchus mykiss mRNA for IL-6 subfamily member M17 (m17 gene)	1.481	3e-05	CTF1		CTF1		cardiotrophin 1	Extracellular Space	cytokine
	IMM 585	NM_001195170	Oncorhynchus mykiss IL-6 subfamily cytokine M17 (m17) mRNA_x0001_emb-FM866398.1- Oncorhynchus mykiss mRNA for IL-6 subfamily member M17 (m17 gene)	1.216	0.000463	CTF1		CTF1		cardiotrophin 1	Extracellular Space	cytokine
	TC137332	NM_001139999	Salmo salar connective tissue growth factor (ctgf) mRNA_x0001_gb-BT045041.1- Salmo salar clone ssal-rgf-510-167 Connective tissue growth factor precursor putative mRNA complete cds	1.807	1.6e-05	CTGF		CCN2	1.53286	cellular communication network factor 2	Extracellular Space	growth factor
	TC168987	NM_001139999	Salmo salar connective tissue growth factor (ctgf) mRNA_x0001_gb-BT045041.1- Salmo salar clone ssal-rgf-510-167 Connective tissue growth factor precursor putative mRNA complete cds	1.796	2.4e-05	CTGF		CCN2		cellular communication network factor 2	Extracellular Space	growth factor
	IMM 138	NM_001139999	Salmo salar connective tissue growth factor (ctgf) mRNA_x0001_gb-BT045041.1- Salmo salar clone ssal-rgf-510-167 Connective tissue growth factor precursor putative mRNA complete cds	1.506	4.6e-05	CTGF		CCN2		cellular communication network factor 2	Extracellular Space	growth factor
	IMM 138	NM_001139999	Salmo salar connective tissue growth factor (ctgf) mRNA_x0001_gb-BT045041.1- Salmo salar clone ssal-rgf-510-167 Connective tissue growth factor precursor putative mRNA complete cds	1.494	6.3e-05	CTGF		CCN2		cellular communication network factor 2	Extracellular Space	growth factor
	IMM 138	NM_001139999	Salmo salar connective tissue growth factor (ctgf) mRNA_x0001_gb-BT045041.1- Salmo salar clone ssal-rgf-510-167 Connective tissue growth factor precursor putative mRNA complete cds	1.464	0.000103	CTGF		CCN2		cellular communication network factor 2	Extracellular Space	growth factor
	IMM 138	NM_001139999	Salmo salar connective tissue growth factor (ctgf) mRNA_x0001_gb-BT045041.1- Salmo salar clone ssal-rgf-510-167 Connective tissue growth factor precursor putative mRNA complete cds	1.4	0.000101	CTGF		CCN2		cellular communication network factor 2	Extracellular Space	growth factor
	TC166062	NM_001139999	Salmo salar connective tissue growth factor (ctgf) mRNA_x0001_gb-BT045041.1- Salmo salar clone ssal-rgf-510-167 Connective tissue growth factor precursor putative mRNA complete cds	1.263	0.000476	CTGF		CCN2		cellular communication network factor 2	Extracellular Space	growth factor
	CUST_23_PI420312184	NM_001124316	Oncorhynchus mykiss virus-induced CXC chemokine (LOC100135977) mRNA_x0001_gb-AF396869.1- Oncorhynchus mykiss virus-induced CXC chemokine mRNA complete cds	-1.244	0.042239	CXCL10		CXCL10	-1.99933	C-X-C motif chemokine ligand 10	Extracellular Space	cytokine
	TC132837	NM_001124316	Oncorhynchus mykiss virus-induced CXC chemokine (LOC100135977) mRNA_x0001_gb-AF396869.1- Oncorhynchus mykiss virus-induced CXC chemokine mRNA complete cds	-1.845	0.034683	CXCL10		CXCL10		C-X-C motif chemokine ligand 10	Extracellular Space	cytokine
	IMM 898	AJ303075	Oncorhynchus mykiss partial mRNA for putative CXC chemokine (cxc gene)	-2.909	0.024601	CXCL10		CXCL10		C-X-C motif chemokine ligand 10	Extracellular Space	cytokine
	IMM 897	NM_001124521	Oncorhynchus mykiss myc-regulated DEAD box protein (LOC100136257) mRNA_x0001_gb-AY614597.1- Oncorhynchus mykiss myc-regulated DEAD box protein mRNA complete cds	5.031	0	CXCL2		CXCL2	4.53871	C-X-C motif chemokine ligand 2	Extracellular Space	cytokine
	IMM 897	NM_001124521	Oncorhynchus mykiss myc-regulated DEAD box protein (LOC100136257) mRNA_x0001_gb-AY614597.1- Oncorhynchus mykiss myc-regulated DEAD box protein mRNA complete cds	4.951	0	CXCL2		CXCL2		C-X-C motif chemokine ligand 2	Extracellular Space	cytokine
	IMM 547	NM_001124521	Oncorhynchus mykiss myc-regulated DEAD box protein (LOC100136257) mRNA_x0001_gb-AY614597.1- Oncorhynchus mykiss myc-regulated DEAD box protein mRNA complete cds	4.898	0	CXCL2		CXCL2		C-X-C motif chemokine ligand 2	Extracellular Space	cytokine
	IMM 547	NM_001124521	Oncorhynchus mykiss myc-regulated DEAD box protein (LOC100136257) mRNA_x0001_gb-AY614597.1- Oncorhynchus mykiss myc-regulated DEAD box protein mRNA complete cds	4.894	0	CXCL2		CXCL2		C-X-C motif chemokine ligand 2	Extracellular Space	cytokine
	IMM 897	NM_001124521	Oncorhynchus mykiss myc-regulated DEAD box protein (LOC100136257) mRNA_x0001_gb-AY614597.1- Oncorhynchus mykiss myc-regulated DEAD box protein mRNA complete cds	4.783	0	CXCL2		CXCL2		C-X-C motif chemokine ligand 2	Extracellular Space	cytokine
	IMM 547	NM_001124521	Oncorhynchus mykiss myc-regulated DEAD box protein (LOC100136257) mRNA_x0001_gb-AY614597.1- Oncorhynchus mykiss myc-regulated DEAD box protein mRNA complete cds	4.737	0	CXCL2		CXCL2		C-X-C motif chemokine ligand 2	Extracellular Space	cytokine
	TC155613	AY160981	Oncorhynchus mykiss interleukin-8 (IL-8) mRNA IL-8-nL allele complete cds	4.585	0	CXCL2		CXCL2		C-X-C motif chemokine ligand 2	Extracellular Space	cytokine
	IMM 890	AJ279069	Oncorhynchus mykiss mRNA for putative interleukin 8 (IL-8 gene)	4.482	0	CXCL2		CXCL2		C-X-C motif chemokine ligand 2	Extracellular Space	cytokine
	IMM 890	AJ279069	Oncorhynchus mykiss mRNA for putative interleukin 8 (IL-8 gene)	4.463	0	CXCL2		CXCL2		C-X-C motif chemokine ligand 2	Extracellular Space	cytokine
	IMM 890	AJ279069	Oncorhynchus mykiss mRNA for putative interleukin 8 (IL-8 gene)	4.416	1e-06	CXCL2		CXCL2		C-X-C motif chemokine ligand 2	Extracellular Space	cytokine
	CUST_106_PI420312184	NM_001124521	Oncorhynchus mykiss myc-regulated DEAD box protein (LOC100136257) mRNA_x0001_gb-AY614597.1- Oncorhynchus mykiss myc-regulated DEAD box protein mRNA complete cds	4.285	0	CXCL2		CXCL2		C-X-C motif chemokine ligand 2	Extracellular Space	cytokine
	IMM 1056	NM_001124521	Oncorhynchus mykiss myc-regulated DEAD box protein (LOC100136257) mRNA_x0001_gb-AY614597.1- Oncorhynchus mykiss myc-regulated DEAD box protein mRNA complete cds	4.093	0	CXCL2		CXCL2		C-X-C motif chemokine ligand 2	Extracellular Space	cytokine
	IMM 1056	NM_001124521	Oncorhynchus mykiss myc-regulated DEAD box protein (LOC100136257) mRNA_x0001_gb-AY614597.1- Oncorhynchus mykiss myc-regulated DEAD box protein mRNA complete cds	4.043	1e-06	CXCL2		CXCL2		C-X-C motif chemokine ligand 2	Extracellular Space	cytokine
	IMM 1056	NM_001124521	Oncorhynchus mykiss myc-regulated DEAD box protein (LOC100136257) mRNA_x0001_gb-AY614597.1- Oncorhynchus mykiss myc-regulated DEAD box protein mRNA complete cds	3.881	1e-06	CXCL2		CXCL2		C-X-C motif chemokine ligand 2	Extracellular Space	cytokine
	TC132449	AF260960	Oncorhynchus mykiss clone HC IL-8 receptor (IL-8R) mRNA complete cds	1.591	0.00019	CXCR1		CXCR1	1.5175	C-X-C motif chemokine receptor 1	Plasma Membrane	G-protein coupled receptor
	CUST_104_PI420312184	NM_001124279	Oncorhynchus mykiss interleukin 8 receptor (il8r) mRNA_x0001_gb-AF260964.1- Oncorhynchus mykiss clone AR IL-8 receptor (IL-8R) mRNA complete cds	1.444	0.000161	CXCR1		CXCR1		C-X-C motif chemokine receptor 1	Plasma Membrane	G-protein coupled receptor
	IMM 803	AF260966	Oncorhynchus mykiss clone OSU IL-8 receptor (IL-8R) mRNA complete cds	1.976	4e-06	CXCR2		CXCR2	1.75067	C-X-C motif chemokine receptor 2	Plasma Membrane	G-protein coupled receptor
	IMM 803	AF260966	Oncorhynchus mykiss clone OSU IL-8 receptor (IL-8R) mRNA complete cds	1.729	0.000147	CXCR2		CXCR2		C-X-C motif chemokine receptor 2	Plasma Membrane	G-protein coupled receptor
	IMM 803	AF260966	Oncorhynchus mykiss clone OSU IL-8 receptor (IL-8R) mRNA complete cds	1.547	0.000212	CXCR2		CXCR2		C-X-C motif chemokine receptor 2	Plasma Membrane	G-protein coupled receptor
	TC161616	BT060355	Salmo salar clone ssal-rgh-516-216 C-X-C chemokine receptor type 4 putative mRNA complete cds	2.485	7e-06	CXCR4		CXCR4	1.71538	C-X-C motif chemokine receptor 4	Plasma Membrane	G-protein coupled receptor
	IMM 1060	NM_001124342	Oncorhynchus mykiss CXC chemokine receptor (LOC100136014) mRNA_x0001_emb-AJ001039.1- Oncorhynchus mykiss mRNA for CXC chemokine receptor	2.209	1e-06	CXCR4		CXCR4		C-X-C motif chemokine receptor 4	Plasma Membrane	G-protein coupled receptor
	IMM 1060	NM_001124342	Oncorhynchus mykiss CXC chemokine receptor (LOC100136014) mRNA_x0001_emb-AJ001039.1- Oncorhynchus mykiss mRNA for CXC chemokine receptor	2.153	8e-06	CXCR4		CXCR4		C-X-C motif chemokine receptor 4	Plasma Membrane	G-protein coupled receptor
	IMM 1060	NM_001124342	Oncorhynchus mykiss CXC chemokine receptor (LOC100136014) mRNA_x0001_emb-AJ001039.1- Oncorhynchus mykiss mRNA for CXC chemokine receptor	2.111	1e-05	CXCR4		CXCR4		C-X-C motif chemokine receptor 4	Plasma Membrane	G-protein coupled receptor
	IMM 98	BT060355	Salmo salar clone ssal-rgh-516-216 C-X-C chemokine receptor type 4 putative mRNA complete cds	1.934	1e-05	CXCR4		CXCR4		C-X-C motif chemokine receptor 4	Plasma Membrane	G-protein coupled receptor
	IMM 98	BT060355	Salmo salar clone ssal-rgh-516-216 C-X-C chemokine receptor type 4 putative mRNA complete cds	1.907	3.9e-05	CXCR4		CXCR4		C-X-C motif chemokine receptor 4	Plasma Membrane	G-protein coupled receptor
	TC137588	NM_001124342	Oncorhynchus mykiss CXC chemokine receptor (LOC100136014) mRNA_x0001_emb-AJ001039.1- Oncorhynchus mykiss mRNA for CXC chemokine receptor	1.872	6e-06	CXCR4		CXCR4		C-X-C motif chemokine receptor 4	Plasma Membrane	G-protein coupled receptor
	TC144930	BT060355	Salmo salar clone ssal-rgh-516-216 C-X-C chemokine receptor type 4 putative mRNA complete cds	1.862	8e-06	CXCR4		CXCR4		C-X-C motif chemokine receptor 4	Plasma Membrane	G-protein coupled receptor
	IMM 98	BT060355	Salmo salar clone ssal-rgh-516-216 C-X-C chemokine receptor type 4 putative mRNA complete cds	1.744	4.6e-05	CXCR4		CXCR4		C-X-C motif chemokine receptor 4	Plasma Membrane	G-protein coupled receptor
	IMM 98	BT060355	Salmo salar clone ssal-rgh-516-216 C-X-C chemokine receptor type 4 putative mRNA complete cds	1.609	0.000179	CXCR4		CXCR4		C-X-C motif chemokine receptor 4	Plasma Membrane	G-protein coupled receptor
	IMM 543	NM_001124342	Oncorhynchus mykiss CXC chemokine receptor (LOC100136014) mRNA_x0001_emb-AJ001039.1- Oncorhynchus mykiss mRNA for CXC chemokine receptor	1.326	8.3e-05	CXCR4		CXCR4		C-X-C motif chemokine receptor 4	Plasma Membrane	G-protein coupled receptor
	IMM 877	NM_001124342	Oncorhynchus mykiss CXC chemokine receptor (LOC100136014) mRNA_x0001_emb-AJ001039.1- Oncorhynchus mykiss mRNA for CXC chemokine receptor	1.312	3.6e-05	CXCR4		CXCR4		C-X-C motif chemokine receptor 4	Plasma Membrane	G-protein coupled receptor
	IMM 877	NM_001124342	Oncorhynchus mykiss CXC chemokine receptor (LOC100136014) mRNA_x0001_emb-AJ001039.1- Oncorhynchus mykiss mRNA for CXC chemokine receptor	1.291	5.5e-05	CXCR4		CXCR4		C-X-C motif chemokine receptor 4	Plasma Membrane	G-protein coupled receptor
	IMM 543	NM_001124342	Oncorhynchus mykiss CXC chemokine receptor (LOC100136014) mRNA_x0001_emb-AJ001039.1- Oncorhynchus mykiss mRNA for CXC chemokine receptor	1.263	0.000223	CXCR4		CXCR4		C-X-C motif chemokine receptor 4	Plasma Membrane	G-protein coupled receptor
	IMM 543	NM_001124342	Oncorhynchus mykiss CXC chemokine receptor (LOC100136014) mRNA_x0001_emb-AJ001039.1- Oncorhynchus mykiss mRNA for CXC chemokine receptor	1.255	0.000211	CXCR4		CXCR4		C-X-C motif chemokine receptor 4	Plasma Membrane	G-protein coupled receptor
	IMM 877	NM_001124342	Oncorhynchus mykiss CXC chemokine receptor (LOC100136014) mRNA_x0001_emb-AJ001039.1- Oncorhynchus mykiss mRNA for CXC chemokine receptor	1.113	0.000583	CXCR4		CXCR4		C-X-C motif chemokine receptor 4	Plasma Membrane	G-protein coupled receptor
	TC159941	BT074009	Oncorhynchus mykiss clone omyk-evo-512-283 Cytochrome c putative mRNA complete cds	2.682	1e-06	CYCS		CYCS	1.40367	cytochrome c, somatic	Cytoplasm	transporter
	TC149200	BT074244	Oncorhynchus mykiss clone omyk-evo-501-069 Cytochrome c putative mRNA complete cds	1.297	0.000112	CYCS		CYCS		cytochrome c, somatic	Cytoplasm	transporter
	IMM 152	BT074244	Oncorhynchus mykiss clone omyk-evo-501-069 Cytochrome c putative mRNA complete cds	1.204	0.000106	CYCS		CYCS		cytochrome c, somatic	Cytoplasm	transporter
	TC135227	BT074244	Oncorhynchus mykiss clone omyk-evo-501-069 Cytochrome c putative mRNA complete cds	1.185	9.8e-05	CYCS		CYCS		cytochrome c, somatic	Cytoplasm	transporter
	TC135836	BT073740	Oncorhynchus mykiss clone omyk-evo-502-107 Cytochrome c putative mRNA complete cds	1.053	0.000295	CYCS		CYCS		cytochrome c, somatic	Cytoplasm	transporter
	IMM 152	BT074244	Oncorhynchus mykiss clone omyk-evo-501-069 Cytochrome c putative mRNA complete cds	1.001	0.000278	CYCS		CYCS		cytochrome c, somatic	Cytoplasm	transporter
	TC132356	M21310	Rainbow trout (S.gairdneri) cytochrome P450IA1 mRNA complete cds	2.05	7.5e-05	CYP1A1		CYP1A1	1.8135	cytochrome P450 family 1 subfamily A member 1	Cytoplasm	enzyme
	TC158463	NM_001124754	Oncorhynchus mykiss cytochrome P450 1A3 (cyp1a3) mRNA	1.577	0.000479	CYP1A1		CYP1A1		cytochrome P450 family 1 subfamily A member 1	Cytoplasm	enzyme
	TC138642	not-annotated	not-annotated	-1.023	0.005262	CYP2J2		CYP2J2	-1.056	cytochrome P450 family 2 subfamily J member 2	Cytoplasm	enzyme
	TC140399	AF256707	Salmo salar clone BHMS377 microsatellite sequence	-1.089	0.000866	CYP2J2		CYP2J2		cytochrome P450 family 2 subfamily J member 2	Cytoplasm	enzyme
	TC144600	NM_001139977	Salmo salar CEF-10 (cef10) mRNA_x0001_gb-BT044993.1- Salmo salar clone ssal-rgf-509-110 CEF-10 precursor putative mRNA complete cds	1.584	2.8e-05	CYR61		CCN1	1.383	cellular communication network factor 1	Extracellular Space	other
	TC142244	NM_001139977	Salmo salar CEF-10 (cef10) mRNA_x0001_gb-BT044993.1- Salmo salar clone ssal-rgf-509-110 CEF-10 precursor putative mRNA complete cds	1.556	9e-06	CYR61		CCN1		cellular communication network factor 1	Extracellular Space	other
	TC149199	NM_001139977	Salmo salar CEF-10 (cef10) mRNA_x0001_gb-BT044993.1- Salmo salar clone ssal-rgf-509-110 CEF-10 precursor putative mRNA complete cds	1.204	0.000119	CYR61		CCN1		cellular communication network factor 1	Extracellular Space	other
	TC151372	BT073878	Oncorhynchus mykiss clone omyk-evo-508-314 Cysteine-rich protein 1 putative mRNA complete cds	1.188	0.041148	CYR61		CCN1		cellular communication network factor 1	Extracellular Space	other
	TC147250	BT050213	Salmo salar clone ssal-eve-507-181 XTP3-transactivated gene A protein homolog putative mRNA complete cds	-1.017	0.001131	DCTPP1		DCTPP1	-1.1315	dCTP pyrophosphatase 1	Cytoplasm	enzyme
	TC170736	BT046525	Salmo salar clone ssal-evf-535-116 XTP3-transactivated gene A protein homolog putative mRNA complete cds	-1.246	0.000122	DCTPP1		DCTPP1		dCTP pyrophosphatase 1	Cytoplasm	enzyme
	TC160632	BT079663	Esox lucius clone eluc-evq-513-292 DNA-damage-inducible transcript 4 protein putative mRNA complete cds	3.356	0.001156	DDIT4		DDIT4	2.96267	DNA damage inducible transcript 4	Cytoplasm	other
	TC143816	BT079663	Esox lucius clone eluc-evq-513-292 DNA-damage-inducible transcript 4 protein putative mRNA complete cds	3.063	0.000124	DDIT4		DDIT4		DNA damage inducible transcript 4	Cytoplasm	other
	TC134704	BT079663	Esox lucius clone eluc-evq-513-292 DNA-damage-inducible transcript 4 protein putative mRNA complete cds	2.469	0.000243	DDIT4		DDIT4		DNA damage inducible transcript 4	Cytoplasm	other
	IMM 507	NM_001124575	Oncorhynchus mykiss DNA-damage-inducible transcript 4-like (ddit4l) mRNA_x0001_gb-DQ400410.1- Oncorhynchus mykiss DNA-damage-inducible transcript 4-like (DDIT4L) mRNA complete cds	1.544	0.000237	DDIT4L		DDIT4L	1.41575	DNA damage inducible transcript 4 like	Cytoplasm	other
	IMM 507	NM_001124575	Oncorhynchus mykiss DNA-damage-inducible transcript 4-like (ddit4l) mRNA_x0001_gb-DQ400410.1- Oncorhynchus mykiss DNA-damage-inducible transcript 4-like (DDIT4L) mRNA complete cds	1.488	0.000666	DDIT4L		DDIT4L		DNA damage inducible transcript 4 like	Cytoplasm	other
	TC132437	NM_001124575	Oncorhynchus mykiss DNA-damage-inducible transcript 4-like (ddit4l) mRNA_x0001_gb-DQ400410.1- Oncorhynchus mykiss DNA-damage-inducible transcript 4-like (DDIT4L) mRNA complete cds	1.402	0.000197	DDIT4L		DDIT4L		DNA damage inducible transcript 4 like	Cytoplasm	other
	IMM 507	NM_001124575	Oncorhynchus mykiss DNA-damage-inducible transcript 4-like (ddit4l) mRNA_x0001_gb-DQ400410.1- Oncorhynchus mykiss DNA-damage-inducible transcript 4-like (DDIT4L) mRNA complete cds	1.229	0.001854	DDIT4L		DDIT4L		DNA damage inducible transcript 4 like	Cytoplasm	other
	TC137482	NM_130941	Danio rerio pl10 (pl10) mRNA_x0001_gb-BC059794.1- Danio rerio pl10 mRNA (cDNA clone MGC:65735 IMAGE:6790263) complete cds	1.604	0.020088	DDX3X		DDX3X	1.3685	DEAD-box helicase 3 X-linked	Cytoplasm	enzyme
	TC145888	NM_001126423	Danio rerio DEAD (Asp-Glu-Ala-Asp) box polypeptide 3 (ddx3) mRNA	1.133	8e-05	DDX3X		DDX3X		DEAD-box helicase 3 X-linked	Cytoplasm	enzyme
	TC168618	BT059556	Salmo salar clone ssal-rgf-516-259 Probable ATP-dependent RNA helicase DDX5 putative mRNA complete cds	2.284	0	DDX5		DDX5	1.8642	DEAD-box helicase 5	Nucleus	enzyme
	TC162719	BT059556	Salmo salar clone ssal-rgf-516-259 Probable ATP-dependent RNA helicase DDX5 putative mRNA complete cds	2.098	0	DDX5		DDX5		DEAD-box helicase 5	Nucleus	enzyme
	TC162787	BT059556	Salmo salar clone ssal-rgf-516-259 Probable ATP-dependent RNA helicase DDX5 putative mRNA complete cds	1.75	0.001446	DDX5		DDX5		DEAD-box helicase 5	Nucleus	enzyme
	TC166162	BT059556	Salmo salar clone ssal-rgf-516-259 Probable ATP-dependent RNA helicase DDX5 putative mRNA complete cds	1.685	3e-06	DDX5		DDX5		DEAD-box helicase 5	Nucleus	enzyme
	TC155538	BT072475	Salmo salar clone ssal-rgf-527-027 Probable ATP-dependent RNA helicase DDX5 putative mRNA partial cds	1.504	0.001599	DDX5		DDX5		DEAD-box helicase 5	Nucleus	enzyme
	TC142494	BT056612	Salmo salar clone ssal-rgb2-559-019 Dehydrogenase/reductase SDR family member 13 precursor putative mRNA complete cds	-1.054	0.000205	DHRS13		DHRS13	-1.08133	dehydrogenase/reductase 13	Other	enzyme
	TC147576	BT049948	Salmo salar clone ssal-eve-555-185 Dehydrogenase/reductase SDR family member 13 precursor putative mRNA complete cds	-1.073	0.042382	DHRS13		DHRS13		dehydrogenase/reductase 13	Other	enzyme
	TC165102	BT056612	Salmo salar clone ssal-rgb2-559-019 Dehydrogenase/reductase SDR family member 13 precursor putative mRNA complete cds	-1.117	0.000854	DHRS13		DHRS13		dehydrogenase/reductase 13	Other	enzyme
	TC169650	NM_001173729	Salmo salar Short-chain dehydrogenase/reductase 3 (dhrs3) mRNA_x0001_gb-BT059354.1- Salmo salar clone ssal-rgf-520-139 Short-chain dehydrogenase/reductase 3 putative mRNA complete cds	-1.27	0.002672	DHRS3		DHRS3	-1.3905	dehydrogenase/reductase 3	Cytoplasm	enzyme
	TC137447	NM_001173729	Salmo salar Short-chain dehydrogenase/reductase 3 (dhrs3) mRNA_x0001_gb-BT059354.1- Salmo salar clone ssal-rgf-520-139 Short-chain dehydrogenase/reductase 3 putative mRNA complete cds	-1.511	0.004489	DHRS3		DHRS3		dehydrogenase/reductase 3	Cytoplasm	enzyme
	TC140862	NM_001140049	Salmo salar dyskeratosis congenita 1 dyskerin (dkc1) mRNA_x0001_gb-BT045139.1- Salmo salar clone ssal-rgf-513-095 H/ACA ribonucleoprotein complex subunit 4 putative mRNA complete cds	1.367	0.000113	DKC1		DKC1	1.2275	dyskerin pseudouridine synthase 1	Nucleus	enzyme
	TC135236	NM_001140049	Salmo salar dyskeratosis congenita 1 dyskerin (dkc1) mRNA_x0001_gb-BT045139.1- Salmo salar clone ssal-rgf-513-095 H/ACA ribonucleoprotein complex subunit 4 putative mRNA complete cds	1.275	3.4e-05	DKC1		DKC1		dyskerin pseudouridine synthase 1	Nucleus	enzyme
	TC154008	NM_001140049	Salmo salar dyskeratosis congenita 1 dyskerin (dkc1) mRNA_x0001_gb-BT045139.1- Salmo salar clone ssal-rgf-513-095 H/ACA ribonucleoprotein complex subunit 4 putative mRNA complete cds	1.169	0.000112	DKC1		DKC1		dyskerin pseudouridine synthase 1	Nucleus	enzyme
	TC146336	NM_001140049	Salmo salar dyskeratosis congenita 1 dyskerin (dkc1) mRNA_x0001_gb-BT045139.1- Salmo salar clone ssal-rgf-513-095 H/ACA ribonucleoprotein complex subunit 4 putative mRNA complete cds	1.099	0.000116	DKC1		DKC1		dyskerin pseudouridine synthase 1	Nucleus	enzyme
	TC132836	NM_001140540	Salmo salar DnaJ homolog subfamily B member 14 (djb14) mRNA_x0001_gb-BT046047.1- Salmo salar clone ssal-rgf-540-085 DnaJ homolog subfamily B member 14 putative mRNA complete cds	2.131	0.006353	DNAJB14		DNAJB14	1.733	DnaJ heat shock protein family (Hsp40) member B14	Cytoplasm	enzyme
	TC149917	NM_001140540	Salmo salar DnaJ homolog subfamily B member 14 (djb14) mRNA_x0001_gb-BT046047.1- Salmo salar clone ssal-rgf-540-085 DnaJ homolog subfamily B member 14 putative mRNA complete cds	2.032	0.032513	DNAJB14		DNAJB14		DnaJ heat shock protein family (Hsp40) member B14	Cytoplasm	enzyme
	TC144766	NM_001140540	Salmo salar DnaJ homolog subfamily B member 14 (djb14) mRNA_x0001_gb-BT046047.1- Salmo salar clone ssal-rgf-540-085 DnaJ homolog subfamily B member 14 putative mRNA complete cds	1.036	0.009672	DNAJB14		DNAJB14		DnaJ heat shock protein family (Hsp40) member B14	Cytoplasm	enzyme
	TC162740	NM_001173782	Salmo salar Dynein light chain 4 axonemal (dnal4) mRNA_x0001_gb-BT059494.1- Salmo salar clone ssal-rgf-516-203 Dynein light chain 4 axonemal putative mRNA complete cds	-1.134	0.018504	DNAL4		DNAL4	-1.348	dynein axonemal light chain 4	Cytoplasm	enzyme
	TC158446	NM_001173782	Salmo salar Dynein light chain 4 axonemal (dnal4) mRNA_x0001_gb-BT059494.1- Salmo salar clone ssal-rgf-516-203 Dynein light chain 4 axonemal putative mRNA complete cds	-1.562	0.035144	DNAL4		DNAL4		dynein axonemal light chain 4	Cytoplasm	enzyme
	IMM 299	CR729718	Tetraodon nigroviridis full-length cDNA	-1.097	0.000712	DUSP22		DUSP22	-1.27275	dual specificity phosphatase 22	Cytoplasm	phosphatase
	IMM 299	CR729718	Tetraodon nigroviridis full-length cDNA	-1.255	0.000601	DUSP22		DUSP22		dual specificity phosphatase 22	Cytoplasm	phosphatase
	IMM 299	CR729718	Tetraodon nigroviridis full-length cDNA	-1.345	7.4e-05	DUSP22		DUSP22		dual specificity phosphatase 22	Cytoplasm	phosphatase
	TC147186	CR729718	Tetraodon nigroviridis full-length cDNA	-1.394	0.035276	DUSP22		DUSP22		dual specificity phosphatase 22	Cytoplasm	phosphatase
	TC144943	XM_002824660	PREDICTED: Pongo abelii egl nine homolog 3-like transcript variant 2 (LOC100451138) mRNA	2.439	0.000476	EGLN3		EGLN3	2.11	egl-9 family hypoxia inducible factor 3	Cytoplasm	enzyme
	TC142840	XM_002200512	PREDICTED: Taeniopygia guttata egl nine homolog 3 (C. elegans) (LOC100219039) mRNA	1.781	7e-06	EGLN3		EGLN3		egl-9 family hypoxia inducible factor 3	Cytoplasm	enzyme
	TC142192	BT050375	Salmo salar clone ssal-rgf-535-024 Eukaryotic translation initiation factor 1b putative mRNA complete cds	2.377	0	EIF1B		EIF1B	1.89667	eukaryotic translation initiation factor 1B	Cytoplasm	translation regulator
	TC139779	BT056792	Salmo salar clone ssal-eve-558-331 Eukaryotic translation initiation factor 1b putative mRNA complete cds	1.681	1e-06	EIF1B		EIF1B		eukaryotic translation initiation factor 1B	Cytoplasm	translation regulator
	TC148015	NM_001165193	Oncorhynchus mykiss eukaryotic translation initiation factor 1B (eif1b) mRNA_x0001_gb-BT074268.1- Oncorhynchus mykiss clone omyk-evo-513-346 Eukaryotic translation initiation factor 1b putative mRNA complete cds	1.632	1e-06	EIF1B		EIF1B		eukaryotic translation initiation factor 1B	Cytoplasm	translation regulator
	TC139725	not-annotated	not-annotated	1.595	0.0002	ELAC1		ELAC1	1.51033	elaC ribonuclease Z 1	Nucleus	enzyme
	TC143685	not-annotated	not-annotated	1.551	4e-06	ELAC1		ELAC1		elaC ribonuclease Z 1	Nucleus	enzyme
	TC137897	not-annotated	not-annotated	1.385	0.000104	ELAC1		ELAC1		elaC ribonuclease Z 1	Nucleus	enzyme
	TC139255	not-annotated	not-annotated	1.934	1e-06	ELOVL1		ELOVL1	1.681	ELOVL fatty acid elongase 1	Cytoplasm	enzyme
	TC150028	NM_001146393	Salmo salar Elongation of very long chain fatty acids protein 1 (elov1) mRNA_x0001_gb-BT056536.1- Salmo salar clone ssal-evf-543-268 Elongation of very long chain fatty acids protein 1 putative mRNA complete cds	1.868	1.1e-05	ELOVL1		ELOVL1		ELOVL fatty acid elongase 1	Cytoplasm	enzyme
	TC140097	NM_213416	Danio rerio elongation of very long chain fatty acids (FEN1/Elo2 SUR4/Elo3 yeast)-like 1b (elovl1b) mRNA_x0001_gb-BC049330.1- Danio rerio elongation of very long chain fatty acids (FEN1/Elo2 SUR4/Elo3 yeast)-like 1b mRNA (cDNA clone MGC:56567 IMAGE:5914824) complete cds	1.241	3.3e-05	ELOVL1		ELOVL1		ELOVL fatty acid elongase 1	Cytoplasm	enzyme
	TC136829	BT071894	Salmo salar clone ssal-rgf-502-256 C-ets-2 putative mRNA pseudogene cds	2.026	4e-06	ETS1		ETS1	1.8285	ETS proto-oncogene 1, transcription factor	Nucleus	transcription regulator
	TC153889	BT071894	Salmo salar clone ssal-rgf-502-256 C-ets-2 putative mRNA pseudogene cds	1.631	6.1e-05	ETS1		ETS1		ETS proto-oncogene 1, transcription factor	Nucleus	transcription regulator
	TC154041	NM_001140089	Salmo salar v-ets erythroblastosis virus E26 oncogene homolog 2 (avian) (ets2) mRNA_x0001_gb-BT045218.1- Salmo salar clone ssal-rgf-515-168 C-ets-2 putative mRNA complete cds	3.027	0	ETS2		ETS2	2.717	ETS proto-oncogene 2, transcription factor	Nucleus	transcription regulator
	TC161588	NM_001140089	Salmo salar v-ets erythroblastosis virus E26 oncogene homolog 2 (avian) (ets2) mRNA_x0001_gb-BT045218.1- Salmo salar clone ssal-rgf-515-168 C-ets-2 putative mRNA complete cds	2.407	1e-06	ETS2		ETS2		ETS proto-oncogene 2, transcription factor	Nucleus	transcription regulator
	TC134901	NM_001124358	Oncorhynchus mykiss tissue factor (tf) mRNA_x0001_emb-AJ295167.2- Oncorhynchus mykiss mRNA for tissue factor (tf gene)	2.875	2e-06	F3		F3	2.52267	coagulation factor III, tissue factor	Plasma Membrane	cell surface receptor
	IMM 892	NM_001124358	Oncorhynchus mykiss tissue factor (tf) mRNA_x0001_emb-AJ295167.2- Oncorhynchus mykiss mRNA for tissue factor (tf gene)	2.65	0	F3		F3		coagulation factor III, tissue factor	Plasma Membrane	cell surface receptor
	TC152172	NM_001124358	Oncorhynchus mykiss tissue factor (tf) mRNA_x0001_emb-AJ295167.2- Oncorhynchus mykiss mRNA for tissue factor (tf gene)	2.649	0	F3		F3		coagulation factor III, tissue factor	Plasma Membrane	cell surface receptor
	IMM 892	NM_001124358	Oncorhynchus mykiss tissue factor (tf) mRNA_x0001_emb-AJ295167.2- Oncorhynchus mykiss mRNA for tissue factor (tf gene)	2.332	1e-06	F3		F3		coagulation factor III, tissue factor	Plasma Membrane	cell surface receptor
	TC132862	NM_001124358	Oncorhynchus mykiss tissue factor (tf) mRNA_x0001_emb-AJ295167.2- Oncorhynchus mykiss mRNA for tissue factor (tf gene)	2.321	4e-06	F3		F3		coagulation factor III, tissue factor	Plasma Membrane	cell surface receptor
	IMM 892	NM_001124358	Oncorhynchus mykiss tissue factor (tf) mRNA_x0001_emb-AJ295167.2- Oncorhynchus mykiss mRNA for tissue factor (tf gene)	2.309	1e-06	F3		F3		coagulation factor III, tissue factor	Plasma Membrane	cell surface receptor
	TC132913	NM_001140945	Salmo salar fumarylacetoacetate hydrolase domain containing 1 (fahd1) nuclear gene encoding mitochondrial protein mRNA_x0001_gb-BT047629.1- Salmo salar clone ssal-eve-573-155 Fumarylacetoacetate hydrolase domain-containing protein 1 putative mRNA complete cds	-1.008	0.000341	FAHD1		FAHD1	-1.0615	fumarylacetoacetate hydrolase domain containing 1	Cytoplasm	enzyme
	TC140686	NM_001140945	Salmo salar fumarylacetoacetate hydrolase domain containing 1 (fahd1) nuclear gene encoding mitochondrial protein mRNA_x0001_gb-BT047629.1- Salmo salar clone ssal-eve-573-155 Fumarylacetoacetate hydrolase domain-containing protein 1 putative mRNA complete cds	-1.115	0.003684	FAHD1		FAHD1		fumarylacetoacetate hydrolase domain containing 1	Cytoplasm	enzyme
	TC143112	NM_001140829	Salmo salar CJ058 protein (cj058) mRNA_x0001_gb-BT047171.1- Salmo salar clone ssal-sjb-003-059 C10orf58 homolog precursor putative mRNA complete cds	-1.114	0.001854	FAM213A		PRXL2A	-1.167	peroxiredoxin like 2A	Extracellular Space	other
	TC141399	NM_001193546	Oncorhynchus mykiss selenoprotein U (selu) mRNA	-1.22	0.000235	FAM213A		PRXL2A		peroxiredoxin like 2A	Extracellular Space	other
	TC143221	BT056780	Salmo salar clone ssal-eve-564-305 FAM3C precursor putative mRNA complete cds	-1.308	4.5e-05	FAM3C		FAM3C	-1.4345	FAM3 metabolism regulating signaling molecule C	Extracellular Space	cytokine
	TC133927	BT046831	Salmo salar clone ssal-eve-525-316 FAM3C precursor putative mRNA complete cds	-1.561	1.5e-05	FAM3C		FAM3C		FAM3 metabolism regulating signaling molecule C	Extracellular Space	cytokine
	TC152757	not-annotated	not-annotated	-1.981	0.000121	FCGBP		FCGBP	-2.076	Fc fragment of IgG binding protein	Extracellular Space	other
	TC165726	not-annotated	not-annotated	-2.171	3.6e-05	FCGBP		FCGBP		Fc fragment of IgG binding protein	Extracellular Space	other
	TC150196	not-annotated	not-annotated	2.241	1e-06	FIBIN		FIBIN	1.70533	fin bud initiation factor homolog	Cytoplasm	other
	TC140492	HQ021747	Sparus aurata clone contig01064 genomic sequence	1.699	1.4e-05	FIBIN		FIBIN		fin bud initiation factor homolog	Cytoplasm	other
	TC137314	HQ021747	Sparus aurata clone contig01064 genomic sequence	1.176	0.001068	FIBIN		FIBIN		fin bud initiation factor homolog	Cytoplasm	other
	TC165451	BT072030	Salmo salar clone ssal-rgf-508-090 farnesyltransferase/geranylgeranyltransferase type-1 subunit alpha putative mRNA pseudogene cds	1.557	7e-06	FNTA		FNTA	1.339	farnesyltransferase, CAAX box, alpha	Cytoplasm	enzyme
	TC143621	BT072030	Salmo salar clone ssal-rgf-508-090 farnesyltransferase/geranylgeranyltransferase type-1 subunit alpha putative mRNA pseudogene cds	1.404	9e-06	FNTA		FNTA		farnesyltransferase, CAAX box, alpha	Cytoplasm	enzyme
	TC156623	BT072030	Salmo salar clone ssal-rgf-508-090 farnesyltransferase/geranylgeranyltransferase type-1 subunit alpha putative mRNA pseudogene cds	1.056	0.000148	FNTA		FNTA		farnesyltransferase, CAAX box, alpha	Cytoplasm	enzyme
	TC150377	AB111054	Oncorhynchus masou mRNA for c-Fos protein complete cds	4.299	0	FOS		FOS	2.3798	Fos proto-oncogene, AP-1 transcription factor subunit	Nucleus	transcription regulator
	IMM 95	AB111054	Oncorhynchus masou mRNA for c-Fos protein complete cds	1.96	0.007096	FOS		FOS		Fos proto-oncogene, AP-1 transcription factor subunit	Nucleus	transcription regulator
	IMM 95	AB111054	Oncorhynchus masou mRNA for c-Fos protein complete cds	1.907	2.7e-05	FOS		FOS		Fos proto-oncogene, AP-1 transcription factor subunit	Nucleus	transcription regulator
	TC154509	AB111054	Oncorhynchus masou mRNA for c-Fos protein complete cds	1.872	0.01125	FOS		FOS		Fos proto-oncogene, AP-1 transcription factor subunit	Nucleus	transcription regulator
	IMM 95	AB111054	Oncorhynchus masou mRNA for c-Fos protein complete cds	1.861	0.001398	FOS		FOS		Fos proto-oncogene, AP-1 transcription factor subunit	Nucleus	transcription regulator
	TC136625	AJ511789	Takifugu rubripes fosB gene exons 1-4	3.498	0.002497	FOSB		FOSB	3.291	FosB proto-oncogene, AP-1 transcription factor subunit	Nucleus	transcription regulator
	TC134770	XM_002723619	PREDICTED: Oryctolagus cuniculus FBJ osteosarcoma oncogene B-like (LOC100348962) mRNA	3.084	0.00342	FOSB		FOSB		FosB proto-oncogene, AP-1 transcription factor subunit	Nucleus	transcription regulator
	TC133953	AC182751	Gasterosteus aculeatus clone VMRC26-154K14 complete sequence	4.09	0	FOSL2		FOSL2	3.887	FOS like 2, AP-1 transcription factor subunit	Nucleus	transcription regulator
	TC133784	XM_002812167	PREDICTED: Pongo abelii fos-related antigen 2-like (LOC100462426) mRNA	3.869	0	FOSL2		FOSL2		FOS like 2, AP-1 transcription factor subunit	Nucleus	transcription regulator
	TC135326	XM_002812167	PREDICTED: Pongo abelii fos-related antigen 2-like (LOC100462426) mRNA	3.702	5.6e-05	FOSL2		FOSL2		FOS like 2, AP-1 transcription factor subunit	Nucleus	transcription regulator
	CUST_9_PI425348775	FoxP3b	0	1.202	8e-05	FOXP3		FOXP3	1.192	forkhead box P3	Nucleus	transcription regulator
	CUST_9_PI425348775	FoxP3b	0	1.182	0.000251	FOXP3		FOXP3		forkhead box P3	Nucleus	transcription regulator
	TC143431	NM_001124549	Oncorhynchus mykiss ferritin H-3 (LOC100136295) mRNA_x0001_dbj-D86627.1- Oncorhynchus mykiss mRNA for ferritin H-3 complete cds	2.551	0.019106	FTH1		FTH1	2.031	ferritin heavy chain 1	Cytoplasm	enzyme
	IMM 637	BT049618	Salmo salar clone ssal-rgb2-507-351 Ferritin middle subunit putative mRNA complete cds	1.801	0.013895	FTH1		FTH1		ferritin heavy chain 1	Cytoplasm	enzyme
	TC160684	NM_001160521	Oncorhynchus mykiss Ferritin heavy subunit (frih) mRNA_x0001_gb-BT073048.1- Oncorhynchus mykiss clone omyk-evn-507-078 Ferritin heavy subunit putative mRNA complete cds	1.741	0.000608	FTH1		FTH1		ferritin heavy chain 1	Cytoplasm	enzyme
	TC137319	BT071980	Salmo salar clone ssal-rgf-506-050 Plasma alpha-L-fucosidase precursor putative mRNA pseudogene cds	-1.064	0.043798	FUCA2		FUCA2	-1.0865	alpha-L-fucosidase 2	Extracellular Space	enzyme
	TC162661	BT071980	Salmo salar clone ssal-rgf-506-050 Plasma alpha-L-fucosidase precursor putative mRNA pseudogene cds	-1.109	0.000382	FUCA2		FUCA2		alpha-L-fucosidase 2	Extracellular Space	enzyme
	TC136211	BT056488	Salmo salar clone ssal-evf-513-150 Growth arrest and DNA-damage-inducible protein GADD45 alpha putative mRNA complete cds	2.032	5e-06	GADD45A		GADD45A	1.6075	growth arrest and DNA damage inducible alpha	Nucleus	other
	IMM 205	BT057774	Salmo salar clone ssal-eve-514-375 Growth arrest and DNA-damage-inducible protein GADD45 alpha putative mRNA complete cds	1.183	0.000248	GADD45A		GADD45A		growth arrest and DNA damage inducible alpha	Nucleus	other
	TC144227	BT049530	Salmo salar clone ssal-eve-543-092 Growth arrest and DNA-damage-inducible protein GADD45 beta putative mRNA complete cds	1.392	7.6e-05	GADD45B		GADD45B	1.2125	growth arrest and DNA damage inducible beta	Cytoplasm	other
	TC150743	NM_001160537	Oncorhynchus mykiss Growth arrest and DNA-damage-inducible protein GADD45 beta (ga45b) mRNA_x0001_gb-BT073096.1- Oncorhynchus mykiss clone omyk-evn-507-243 Growth arrest and DNA-damage-inducible protein GADD45 beta putative mRNA complete cds	1.033	0.000686	GADD45B		GADD45B		growth arrest and DNA damage inducible beta	Cytoplasm	other
	TC166492	BT057655	Salmo salar clone ssal-rgb2-639-016 GATA zinc finger domain-containing protein 1 putative mRNA complete cds	-1.031	0.01227	GATAD1		GATAD1	-1.23683	GATA zinc finger domain containing 1	Nucleus	transcription regulator
	TC143539	BT057655	Salmo salar clone ssal-rgb2-639-016 GATA zinc finger domain-containing protein 1 putative mRNA complete cds	-1.145	3.8e-05	GATAD1		GATAD1		GATA zinc finger domain containing 1	Nucleus	transcription regulator
	TC141414	BT057655	Salmo salar clone ssal-rgb2-639-016 GATA zinc finger domain-containing protein 1 putative mRNA complete cds	-1.21	7.7e-05	GATAD1		GATAD1		GATA zinc finger domain containing 1	Nucleus	transcription regulator
	TC146924	BT057655	Salmo salar clone ssal-rgb2-639-016 GATA zinc finger domain-containing protein 1 putative mRNA complete cds	-1.217	0.014077	GATAD1		GATAD1		GATA zinc finger domain containing 1	Nucleus	transcription regulator
	TC145608	BT057253	Salmo salar clone ssal-eve-517-020 GATA zinc finger domain-containing protein 1 putative mRNA complete cds	-1.34	3.8e-05	GATAD1		GATAD1		GATA zinc finger domain containing 1	Nucleus	transcription regulator
	TC148013	BT057655	Salmo salar clone ssal-rgb2-639-016 GATA zinc finger domain-containing protein 1 putative mRNA complete cds	-1.478	0.00539	GATAD1		GATAD1		GATA zinc finger domain containing 1	Nucleus	transcription regulator
	TC149030	NM_001173815	Salmo salar opposite strand transcription unit to Stag3 (gats) mRNA_x0001_gb-BT059567.1- Salmo salar clone ssal-rgf-517-299 GATS putative mRNA complete cds	1.589	0.030839	GATSL3		CASTOR1	1.3235	cytosolic arginine sensor for mTORC1 subunit 1	Cytoplasm	other
	TC163915	NM_001173815	Salmo salar opposite strand transcription unit to Stag3 (gats) mRNA_x0001_gb-BT059567.1- Salmo salar clone ssal-rgf-517-299 GATS putative mRNA complete cds	1.058	0.015132	GATSL3		CASTOR1		cytosolic arginine sensor for mTORC1 subunit 1	Cytoplasm	other
	IMM 478	NM_001124446	Oncorhynchus mykiss glycogen synthase kinase binding protein (gbp) mRNA_x0001_gb-AY103470.1- Oncorhynchus mykiss guanylate-binding protein mRNA complete cds	-1.057	0.02124	GBP1		GBP1	-1.4548	guanylate binding protein 1	Cytoplasm	enzyme
	IMM 562	NM_001124446	Oncorhynchus mykiss glycogen synthase kinase binding protein (gbp) mRNA_x0001_gb-AY103470.1- Oncorhynchus mykiss guanylate-binding protein mRNA complete cds	-1.459	0.003029	GBP1		GBP1		guanylate binding protein 1	Cytoplasm	enzyme
	IMM 562	NM_001124446	Oncorhynchus mykiss glycogen synthase kinase binding protein (gbp) mRNA_x0001_gb-AY103470.1- Oncorhynchus mykiss guanylate-binding protein mRNA complete cds	-1.489	0.007507	GBP1		GBP1		guanylate binding protein 1	Cytoplasm	enzyme
	IMM 478	NM_001124446	Oncorhynchus mykiss glycogen synthase kinase binding protein (gbp) mRNA_x0001_gb-AY103470.1- Oncorhynchus mykiss guanylate-binding protein mRNA complete cds	-1.59	0.001727	GBP1		GBP1		guanylate binding protein 1	Cytoplasm	enzyme
	IMM 478	NM_001124446	Oncorhynchus mykiss glycogen synthase kinase binding protein (gbp) mRNA_x0001_gb-AY103470.1- Oncorhynchus mykiss guanylate-binding protein mRNA complete cds	-1.679	0.000235	GBP1		GBP1		guanylate binding protein 1	Cytoplasm	enzyme
	IMM 265	NM_001124446	Oncorhynchus mykiss glycogen synthase kinase binding protein (gbp) mRNA_x0001_gb-AY103470.1- Oncorhynchus mykiss guanylate-binding protein mRNA complete cds	-1.115	0.015348	GBP3		GBP3	-1.49983	guanylate binding protein 3	Cytoplasm	enzyme
	IMM 265	NM_001124446	Oncorhynchus mykiss glycogen synthase kinase binding protein (gbp) mRNA_x0001_gb-AY103470.1- Oncorhynchus mykiss guanylate-binding protein mRNA complete cds	-1.326	0.027991	GBP3		GBP3		guanylate binding protein 3	Cytoplasm	enzyme
	IMM 265	NM_001124446	Oncorhynchus mykiss glycogen synthase kinase binding protein (gbp) mRNA_x0001_gb-AY103470.1- Oncorhynchus mykiss guanylate-binding protein mRNA complete cds	-1.342	0.024712	GBP3		GBP3		guanylate binding protein 3	Cytoplasm	enzyme
	IMM 206	NM_001124446	Oncorhynchus mykiss glycogen synthase kinase binding protein (gbp) mRNA_x0001_gb-AY103470.1- Oncorhynchus mykiss guanylate-binding protein mRNA complete cds	-1.702	0.000172	GBP3		GBP3		guanylate binding protein 3	Cytoplasm	enzyme
	IMM 206	NM_001124446	Oncorhynchus mykiss glycogen synthase kinase binding protein (gbp) mRNA_x0001_gb-AY103470.1- Oncorhynchus mykiss guanylate-binding protein mRNA complete cds	-1.734	0.000923	GBP3		GBP3		guanylate binding protein 3	Cytoplasm	enzyme
	IMM 206	NM_001124446	Oncorhynchus mykiss glycogen synthase kinase binding protein (gbp) mRNA_x0001_gb-AY103470.1- Oncorhynchus mykiss guanylate-binding protein mRNA complete cds	-1.78	0.000348	GBP3		GBP3		guanylate binding protein 3	Cytoplasm	enzyme
	TC132564	NM_001173827	Salmo salar CQ039 protein (cq039) mRNA_x0001_gb-BT059597.1- Salmo salar clone ssal-rgf-532-113 C17orf39 homolog putative mRNA complete cds	1.384	0.000114	GID4		GID4	1.295	GID complex subunit 4 homolog	Nucleus	other
	TC154573	NM_001173827	Salmo salar CQ039 protein (cq039) mRNA_x0001_gb-BT059597.1- Salmo salar clone ssal-rgf-532-113 C17orf39 homolog putative mRNA complete cds	1.206	0.000292	GID4		GID4		GID complex subunit 4 homolog	Nucleus	other
	TC138036	NM_001124606	Oncorhynchus mykiss glutamine synthetase (gs04) mRNA_x0001_gb-AF390024.2- Oncorhynchus mykiss glutamine synthetase (GS04) mRNA complete cds	1.276	3.6e-05	GLUL		GLUL	1.1535	glutamate-ammonia ligase	Cytoplasm	enzyme
	TC134187	NM_001124606	Oncorhynchus mykiss glutamine synthetase (gs04) mRNA_x0001_gb-AF390024.2- Oncorhynchus mykiss glutamine synthetase (GS04) mRNA complete cds	1.031	0.001548	GLUL		GLUL		glutamate-ammonia ligase	Cytoplasm	enzyme
	TC164232	BT075200	Osmerus mordax clone omor-eva-506-225 Geminin putative mRNA complete cds	-1.252	0.003651	GMNN		GMNN	-1.312	geminin DNA replication inhibitor	Nucleus	transcription regulator
	TC139644	BT075200	Osmerus mordax clone omor-eva-506-225 Geminin putative mRNA complete cds	-1.372	0.000179	GMNN		GMNN		geminin DNA replication inhibitor	Nucleus	transcription regulator
	TC170755	CR700785	Tetraodon nigroviridis full-length cDNA	1.735	7.5e-05	GRASP		TAMALIN	1.49425	trafficking regulator and scaffold protein tamalin	Plasma Membrane	other
	TC137948	CR700785	Tetraodon nigroviridis full-length cDNA	1.543	4e-06	GRASP		TAMALIN		trafficking regulator and scaffold protein tamalin	Plasma Membrane	other
	TC152363	CR700785	Tetraodon nigroviridis full-length cDNA	1.413	4.3e-05	GRASP		TAMALIN		trafficking regulator and scaffold protein tamalin	Plasma Membrane	other
	TC138755	CR700785	Tetraodon nigroviridis full-length cDNA	1.286	0.000111	GRASP		TAMALIN		trafficking regulator and scaffold protein tamalin	Plasma Membrane	other
	TC151713	BT072035	Salmo salar clone ssal-rgf-508-210 Gelsolin precursor putative mRNA pseudogene cds	-1.277	0.02172	GSN		GSN	-1.5115	gelsolin	Extracellular Space	other
	TC157516	AY686211	Culicoides sonorensis gelsolin gene partial cds	-1.746	0.004265	GSN		GSN		gelsolin	Extracellular Space	other
	TC151884	BT059949	Salmo salar clone ssal-rgg-512-170 Glutathione S-transferase P putative mRNA complete cds	-1.021	0.000467	GSTP1		GSTP1	-1.2125	glutathione S-transferase pi 1	Cytoplasm	enzyme
	TC163717	AB026119	Oncorhynchus nerka GST class pi mRNA for glutathione S-transferase complete cds	-1.07	0.001137	GSTP1		GSTP1		glutathione S-transferase pi 1	Cytoplasm	enzyme
	TC142140	AB026119	Oncorhynchus nerka GST class pi mRNA for glutathione S-transferase complete cds	-1.126	0.000619	GSTP1		GSTP1		glutathione S-transferase pi 1	Cytoplasm	enzyme
	TC133886	BT048579	Salmo salar clone ssal-eve-579-216 Glutathione S-transferase P putative mRNA complete cds	-1.633	0.000339	GSTP1		GSTP1		glutathione S-transferase pi 1	Cytoplasm	enzyme
	TC157284	BT125312	Salmo salar clone ssal-rgb2-638-118 Transcription initiation factor IIB putative mRNA complete cds	1.144	0.004088	GTF2B		GTF2B	1.0965	general transcription factor IIB	Nucleus	transcription regulator
	TC150767	BT125312	Salmo salar clone ssal-rgb2-638-118 Transcription initiation factor IIB putative mRNA complete cds	1.049	0.016285	GTF2B		GTF2B		general transcription factor IIB	Nucleus	transcription regulator
	TC140593	BT125285	Salmo salar clone ssal-eve-510-259 Glycogenin-1 putative mRNA complete cds	1.141	0.009777	GYG1		GYG1	1.102	glycogenin 1	Cytoplasm	enzyme
	TC135842	BT057731	Salmo salar clone ssal-rgb2-564-258 Glycogenin-1 putative mRNA complete cds	1.063	0.031826	GYG1		GYG1		glycogenin 1	Cytoplasm	enzyme
	TC147113	BT074263	Oncorhynchus mykiss clone omyk-evo-505-320 Histone H5A putative mRNA complete cds	-1.746	1.4e-05	H1F0		H1-0	-2.231	H1.0 linker histone	Nucleus	other
	TC166223	BT074263	Oncorhynchus mykiss clone omyk-evo-505-320 Histone H5A putative mRNA complete cds	-1.835	6e-06	H1F0		H1-0		H1.0 linker histone	Nucleus	other
	TC141718	BT074330	Oncorhynchus mykiss clone omyk-evo-501-252 Histone H5A putative mRNA complete cds	-2.545	1e-06	H1F0		H1-0		H1.0 linker histone	Nucleus	other
	TC142939	BT073136	Oncorhynchus mykiss clone omyk-evn-503-031 Histone H5A putative mRNA complete cds	-2.798	0	H1F0		H1-0		H1.0 linker histone	Nucleus	other
	TC148656	BT060197	Salmo salar clone ssal-rgh-508-250 Histone H3.3 putative mRNA complete cds	2.006	0.000473	H3F3A		H3-3A/H3-3B	1.569	H3.3 histone A	Nucleus	other
	TC135731	BT073171	Oncorhynchus mykiss clone omyk-evn-510-375 Histone H3.3 putative mRNA complete cds	1.132	3.5e-05	H3F3A		H3-3A/H3-3B		H3.3 histone A	Nucleus	other
	IMM 234	BT074263	Oncorhynchus mykiss clone omyk-evo-505-320 Histone H5A putative mRNA complete cds	-1.74	9e-06	H5A		-	-1.777	-	-	-
	IMM 234	BT074263	Oncorhynchus mykiss clone omyk-evo-505-320 Histone H5A putative mRNA complete cds	-1.743	3e-05	H5A		-		-	-	-
	IMM 234	BT074263	Oncorhynchus mykiss clone omyk-evo-505-320 Histone H5A putative mRNA complete cds	-1.848	4e-06	H5A		-		-	-	-
	TC162574	NM_001139959	Salmo salar HEXIM protein (hexim) mRNA_x0001_gb-BT044960.1- Salmo salar clone ssal-rgf-508-208 HEXIM putative mRNA complete cds	1.661	3e-06	HEXIM1		HEXIM1	1.3885	HEXIM P-TEFb complex subunit 1	Nucleus	transcription regulator
	TC159059	NM_001139959	Salmo salar HEXIM protein (hexim) mRNA_x0001_gb-BT044960.1- Salmo salar clone ssal-rgf-508-208 HEXIM putative mRNA complete cds	1.116	7.8e-05	HEXIM1		HEXIM1		HEXIM P-TEFb complex subunit 1	Nucleus	transcription regulator
	TC150125	not-annotated	not-annotated	1.433	7.8e-05	HIF1A		HIF1A	1.3125	hypoxia inducible factor 1 subunit alpha	Nucleus	transcription regulator
	TC168871	BT072233	Salmo salar clone ssal-rgf-517-341 Hypoxia-inducible factor 1 alpha putative mRNA partial cds	1.192	0.000246	HIF1A		HIF1A		hypoxia inducible factor 1 subunit alpha	Nucleus	transcription regulator
	TC164390	GU129140	Salmo salar IgH locus B genomic sequence	2.262	0.03364	HK1		HK1	2.0655	hexokinase 1	Cytoplasm	kinase
	TC132802	AY864082	Oncorhynchus mykiss hexokinase 1 (HK1) mRNA partial cds	1.869	0.000903	HK1		HK1		hexokinase 1	Cytoplasm	kinase
	TC152160	BT072136	Salmo salar clone ssal-rgf-513-100 Rho GTPase-activating protein 29 putative mRNA pseudogene cds	1.37	2e-05	HMHA1		ARHGAP45	1.359	Rho GTPase activating protein 45	Cytoplasm	transporter
	TC145279	BT072136	Salmo salar clone ssal-rgf-513-100 Rho GTPase-activating protein 29 putative mRNA pseudogene cds	1.348	5.2e-05	HMHA1		ARHGAP45		Rho GTPase activating protein 45	Cytoplasm	transporter
	TC155732	BT046987	Salmo salar clone ssal-eve-563-197 Heme oxygenase putative mRNA complete cds	2.714	6e-06	HMOX1		HMOX1	2.5405	heme oxygenase 1	Cytoplasm	enzyme
	TC144540	BT046987	Salmo salar clone ssal-eve-563-197 Heme oxygenase putative mRNA complete cds	2.367	2e-06	HMOX1		HMOX1		heme oxygenase 1	Cytoplasm	enzyme
	TC133427	BT044656	Salmo salar clone ssal-rgf-002-074 Heterogeneous nuclear ribonucleoprotein A0 putative mRNA complete cds	1.258	0.000912	HNRNPA0		HNRNPA0	1.15975	heterogeneous nuclear ribonucleoprotein A0	Nucleus	other
	TC155966	BT075703	Osmerus mordax clone omor-rgc-503-033 Heterogeneous nuclear ribonucleoprotein A0 putative mRNA complete cds	1.235	7.8e-05	HNRNPA0		HNRNPA0		heterogeneous nuclear ribonucleoprotein A0	Nucleus	other
	TC168700	BT047843	Salmo salar clone ssal-eve-537-259 Heterogeneous nuclear ribonucleoprotein A0 putative mRNA complete cds	1.121	0.000469	HNRNPA0		HNRNPA0		heterogeneous nuclear ribonucleoprotein A0	Nucleus	other
	TC158541	BT044656	Salmo salar clone ssal-rgf-002-074 Heterogeneous nuclear ribonucleoprotein A0 putative mRNA complete cds	1.025	8.2e-05	HNRNPA0		HNRNPA0		heterogeneous nuclear ribonucleoprotein A0	Nucleus	other
	TC160716	BT045030	Salmo salar clone ssal-rgf-510-110 Histone H1-beta late embryonic putative mRNA complete cds	-1.061	0.00033	HP1BP3		HP1BP3	-1.2405	heterochromatin protein 1 binding protein 3	Nucleus	other
	TC142336	BT045030	Salmo salar clone ssal-rgf-510-110 Histone H1-beta late embryonic putative mRNA complete cds	-1.42	0.016999	HP1BP3		HP1BP3		heterochromatin protein 1 binding protein 3	Nucleus	other
	TC152333	NM_001141632	Salmo salar GTPase HRas (rash) mRNA_x0001_gb-BT044835.1- Salmo salar clone ssal-rgf-505-083 GTPase HRas precursor putative mRNA complete cds	1.905	3e-06	HRAS		HRAS	1.5425	HRas proto-oncogene, GTPase	Plasma Membrane	enzyme
	TC142515	NM_001141632	Salmo salar GTPase HRas (rash) mRNA_x0001_gb-BT044835.1- Salmo salar clone ssal-rgf-505-083 GTPase HRas precursor putative mRNA complete cds	1.18	0.008704	HRAS		HRAS		HRas proto-oncogene, GTPase	Plasma Membrane	enzyme
	TC163932	NM_001173702	Salmo salar Heat shock protein HSP 90-alpha (hs90a) mRNA_x0001_gb-BT059272.1- Salmo salar clone ssal-rgf-537-361 Heat shock protein HSP 90-alpha putative mRNA complete cds	1.944	3.1e-05	HSP90AA1		HSP90AA1	1.6975	heat shock protein 90 alpha family class A member 1	Cytoplasm	enzyme
	TC136379	U89945	Oncorhynchus tshawytscha heat shock protein hsp90 mRNA complete cds	1.451	0.000267	HSP90AA1		HSP90AA1		heat shock protein 90 alpha family class A member 1	Cytoplasm	enzyme
	TC141848	NM_001173702	Salmo salar Heat shock protein HSP 90-alpha (hs90a) mRNA_x0001_gb-BT059272.1- Salmo salar clone ssal-rgf-537-361 Heat shock protein HSP 90-alpha putative mRNA complete cds	2.065	4e-06	HSP90AB1		HSP90AB1	1.375	heat shock protein 90 alpha family class B member 1	Cytoplasm	enzyme
	TC155694	U89945	Oncorhynchus tshawytscha heat shock protein hsp90 mRNA complete cds	1.034	0.027865	HSP90AB1		HSP90AB1		heat shock protein 90 alpha family class B member 1	Cytoplasm	enzyme
	TC132347	NM_001124591	Oncorhynchus mykiss heat shock 90kDa protein 1 beta isoform b (hsp90bb) mRNA_x0001_dbj-AB196458.1- Oncorhynchus mykiss HSP90BB mRNA for heat shock 90kDa protein 1 beta isoform b complete cds	1.026	0.000235	HSP90AB1		HSP90AB1		heat shock protein 90 alpha family class B member 1	Cytoplasm	enzyme
	IMM 1068	K02549	Rainbow trout 70 kd heat shock protein mRNA clone pTHS70.7	2.385	3.8e-05	HSPA1B		HSPA1A/HSPA1B	2.281	heat shock protein family A (Hsp70) member 1A	Cytoplasm	enzyme
	IMM 1068	K02549	Rainbow trout 70 kd heat shock protein mRNA clone pTHS70.7	2.31	4.6e-05	HSPA1B		HSPA1A/HSPA1B		heat shock protein family A (Hsp70) member 1A	Cytoplasm	enzyme
	IMM 1068	K02549	Rainbow trout 70 kd heat shock protein mRNA clone pTHS70.7	2.148	8.1e-05	HSPA1B		HSPA1A/HSPA1B		heat shock protein family A (Hsp70) member 1A	Cytoplasm	enzyme
	TC162374	BT044886	Salmo salar clone ssal-rgf-506-231 60 kDa heat shock protein mitochondrial precursor putative mRNA complete cds	1.913	0.002341	HSPD1		HSPD1	1.43567	heat shock protein family D (Hsp60) member 1	Cytoplasm	enzyme
	TC146024	BT071923	Salmo salar clone ssal-rgf-504-002 60 kDa heat shock protein mitochondrial precursor putative mRNA partial cds	1.378	0.000296	HSPD1		HSPD1		heat shock protein family D (Hsp60) member 1	Cytoplasm	enzyme
	TC161889	BT059657	Salmo salar clone ssal-rgf-502-172 60 kDa heat shock protein mitochondrial precursor putative mRNA complete cds	1.016	0.000565	HSPD1		HSPD1		heat shock protein family D (Hsp60) member 1	Cytoplasm	enzyme
	IMM 235	NM_001124178	Oncorhynchus mykiss tFZR1 (LOC100135780) mRNA_x0001_dbj-AB006153.1- Oncorhynchus mykiss mRNA for tFZR1 complete cds	-1.103	0.000386	HTATSF1		HTATSF1	-1.114	HIV-1 Tat specific factor 1	Nucleus	transcription regulator
	IMM 235	NM_001124178	Oncorhynchus mykiss tFZR1 (LOC100135780) mRNA_x0001_dbj-AB006153.1- Oncorhynchus mykiss mRNA for tFZR1 complete cds	-1.125	0.000373	HTATSF1		HTATSF1		HIV-1 Tat specific factor 1	Nucleus	transcription regulator
	TC155847	BT049490	Salmo salar clone ssal-evf-518-285 IMM ediate early response gene 5 protein putative mRNA complete cds	1.734	1e-06	IER5		IER5	1.4105	immediate early response 5	Nucleus	other
	TC147362	GQ910780	Oncorhynchus keta clone Oke132.U1022 genomic sequence	1.087	0.03105	IER5		IER5		immediate early response 5	Nucleus	other
	IMM 267	not-annotated	not-annotated	-1.004	0.001629	IFI44		IFI44	-1.0805	interferon induced protein 44	Cytoplasm	other
	IMM 267	not-annotated	not-annotated	-1.157	0.000632	IFI44		IFI44		interferon induced protein 44	Cytoplasm	other
	IMM 891	NM_001124613	Oncorhynchus mykiss interferon inducible protein (iip) mRNA_x0001_emb-AJ291989.1- Oncorhynchus Mykiss mRNA for interferon inducible protein (IIP gene)	2.476	1e-06	IFITM5		IFITM5	1.808	interferon induced transmembrane protein 5	Plasma Membrane	other
	IMM 891	NM_001124613	Oncorhynchus mykiss interferon inducible protein (iip) mRNA_x0001_emb-AJ291989.1- Oncorhynchus Mykiss mRNA for interferon inducible protein (IIP gene)	2.377	2e-06	IFITM5		IFITM5		interferon induced transmembrane protein 5	Plasma Membrane	other
	IMM 891	NM_001124613	Oncorhynchus mykiss interferon inducible protein (iip) mRNA_x0001_emb-AJ291989.1- Oncorhynchus Mykiss mRNA for interferon inducible protein (IIP gene)	2.367	8e-06	IFITM5		IFITM5		interferon induced transmembrane protein 5	Plasma Membrane	other
	IMM 746	BT073834	Oncorhynchus mykiss clone omyk-evo-501-202 Interferon-inducible protein putative mRNA complete cds	1.976	0.000643	IFITM5		IFITM5		interferon induced transmembrane protein 5	Plasma Membrane	other
	IMM 746	BT073834	Oncorhynchus mykiss clone omyk-evo-501-202 Interferon-inducible protein putative mRNA complete cds	1.866	0.000267	IFITM5		IFITM5		interferon induced transmembrane protein 5	Plasma Membrane	other
	IMM 746	BT073834	Oncorhynchus mykiss clone omyk-evo-501-202 Interferon-inducible protein putative mRNA complete cds	1.832	0.000895	IFITM5		IFITM5		interferon induced transmembrane protein 5	Plasma Membrane	other
	TC154576	BT073834	Oncorhynchus mykiss clone omyk-evo-501-202 Interferon-inducible protein putative mRNA complete cds	1.164	0.00021	IFITM5		IFITM5		interferon induced transmembrane protein 5	Plasma Membrane	other
	IMM 259	BT073834	Oncorhynchus mykiss clone omyk-evo-501-202 Interferon-inducible protein putative mRNA complete cds	1.134	8.4e-05	IFITM5		IFITM5		interferon induced transmembrane protein 5	Plasma Membrane	other
	IMM 259	BT073834	Oncorhynchus mykiss clone omyk-evo-501-202 Interferon-inducible protein putative mRNA complete cds	1.08	0.000376	IFITM5		IFITM5		interferon induced transmembrane protein 5	Plasma Membrane	other
	IMM 269	BT058907	Salmo salar clone ssal-rgf-512-273 Interferon-related developmental regulator 1 putative mRNA complete cds	1.508	2.3e-05	IFRD1		IFRD1	1.23025	interferon related developmental regulator 1	Nucleus	other
	TC164612	BT058907	Salmo salar clone ssal-rgf-512-273 Interferon-related developmental regulator 1 putative mRNA complete cds	1.161	0.00021	IFRD1		IFRD1		interferon related developmental regulator 1	Nucleus	other
	IMM 269	BT058907	Salmo salar clone ssal-rgf-512-273 Interferon-related developmental regulator 1 putative mRNA complete cds	1.135	0.000276	IFRD1		IFRD1		interferon related developmental regulator 1	Nucleus	other
	IMM 269	BT058907	Salmo salar clone ssal-rgf-512-273 Interferon-related developmental regulator 1 putative mRNA complete cds	1.117	0.00012	IFRD1		IFRD1		interferon related developmental regulator 1	Nucleus	other
	TC132392	NM_001124560	Oncorhynchus mykiss insulin-like growth factor binding protein 6 (igfbp6) mRNA	1.911	1e-06	IGFBP6		IGFBP6	1.645	insulin like growth factor binding protein 6	Extracellular Space	other
	TC160642	NM_001124560	Oncorhynchus mykiss insulin-like growth factor binding protein 6 (igfbp6) mRNA	1.379	2.2e-05	IGFBP6		IGFBP6		insulin like growth factor binding protein 6	Extracellular Space	other
	TC145786	BT057578	Salmo salar clone ssal-rgb2-565-299 Ig kappa-b4 chain C region putative mRNA complete cds	-1.67	0.000643	IGKC		IGKC	-2.331	immunoglobulin kappa constant	Extracellular Space	other
	TC166239	AF462234	Salmo salar clone g2 IgL type 3 gene cluster partial sequence	-2.992	0.000591	IGKC		IGKC		immunoglobulin kappa constant	Extracellular Space	other
	TC158401	BT049194	Salmo salar clone ssal-rgb2-573-002 T-cell receptor beta chain T17T-22 precursor putative mRNA complete cds	-1.007	0.001028	IGLL1		IGLL1/IGLL5	-1.154	immunoglobulin lambda like polypeptide 1	Plasma Membrane	other
	TC153055	BT046646	Salmo salar clone ssal-rgb2-562-380 IMM unoglobulin lambda-like polypeptide 1 precursor putative mRNA complete cds	-1.157	0.008859	IGLL1		IGLL1/IGLL5		immunoglobulin lambda like polypeptide 1	Plasma Membrane	other
	TC152829	U69987	Oncorhynchus mykiss IMM unoglobulin light chain L2 mRNA complete cds	-1.298	0.003836	IGLL1		IGLL1/IGLL5		immunoglobulin lambda like polypeptide 1	Plasma Membrane	other
	CUST_14_PI425348775	IL-10B	0	2.63	0.01915	IL10		IL10	2.348	interleukin 10	Extracellular Space	cytokine
	CUST_14_PI425348775	IL-10B	0	2.066	0.019684	IL10		IL10		interleukin 10	Extracellular Space	cytokine
	TC160181	BT047745	Salmo salar clone ssal-eve-544-209 Interleukin-10 receptor beta chain precursor putative mRNA complete cds	2.648	0.033978	IL10RB		IL10RB	2.03733	interleukin 10 receptor subunit beta	Plasma Membrane	cell surface receptor
	CUST_50_PI425348775	CRFB5	0	1.836	5e-06	IL10RB		IL10RB		interleukin 10 receptor subunit beta	Plasma Membrane	cell surface receptor
	CUST_50_PI425348775	CRFB5	0	1.628	8e-06	IL10RB		IL10RB		interleukin 10 receptor subunit beta	Plasma Membrane	cell surface receptor
	TC132334	NM_001124382	Oncorhynchus mykiss interleukin-11 (il-11) mRNA_x0001_emb-AJ535687.1- Oncorhynchus mykiss mRNA for interleukin-11 (il-11 gene)	3.595	0	IL11		IL11	3.024	interleukin 11	Extracellular Space	cytokine
	IMM 936	NM_001124382	Oncorhynchus mykiss interleukin-11 (il-11) mRNA_x0001_emb-AJ535687.1- Oncorhynchus mykiss mRNA for interleukin-11 (il-11 gene)	3.206	0	IL11		IL11		interleukin 11	Extracellular Space	cytokine
	IMM 936	NM_001124382	Oncorhynchus mykiss interleukin-11 (il-11) mRNA_x0001_emb-AJ535687.1- Oncorhynchus mykiss mRNA for interleukin-11 (il-11 gene)	3.173	0	IL11		IL11		interleukin 11	Extracellular Space	cytokine
	IMM 552	NM_001124382	Oncorhynchus mykiss interleukin-11 (il-11) mRNA_x0001_emb-AJ535687.1- Oncorhynchus mykiss mRNA for interleukin-11 (il-11 gene)	2.894	0	IL11		IL11		interleukin 11	Extracellular Space	cytokine
	IMM 552	NM_001124382	Oncorhynchus mykiss interleukin-11 (il-11) mRNA_x0001_emb-AJ535687.1- Oncorhynchus mykiss mRNA for interleukin-11 (il-11 gene)	2.818	1e-06	IL11		IL11		interleukin 11	Extracellular Space	cytokine
	IMM 552	NM_001124382	Oncorhynchus mykiss interleukin-11 (il-11) mRNA_x0001_emb-AJ535687.1- Oncorhynchus mykiss mRNA for interleukin-11 (il-11 gene)	2.802	0.017953	IL11		IL11		interleukin 11	Extracellular Space	cytokine
	IMM 936	NM_001124382	Oncorhynchus mykiss interleukin-11 (il-11) mRNA_x0001_emb-AJ535687.1- Oncorhynchus mykiss mRNA for interleukin-11 (il-11 gene)	2.68	1e-05	IL11		IL11		interleukin 11	Extracellular Space	cytokine
	IMM 947	NM_001124392	Oncorhynchus mykiss interleukin-12 beta chain (il12b) mRNA_x0001_emb-AJ548829.1- Oncorhynchus mykiss mRNA for interleukin-12 beta chain (il12b gene) large transcript	2.115	1e-06	IL12B		IL12B	1.70722	interleukin 12B	Extracellular Space	cytokine
	TC132478	NM_001124392	Oncorhynchus mykiss interleukin-12 beta chain (il12b) mRNA_x0001_emb-AJ548829.1- Oncorhynchus mykiss mRNA for interleukin-12 beta chain (il12b gene) large transcript	2.049	3.9e-05	IL12B		IL12B		interleukin 12B	Extracellular Space	cytokine
	TC132513	AJ548830	Oncorhynchus mykiss mRNA for interleukin-12 beta chain (il12b gene) small transcript	1.892	4e-06	IL12B		IL12B		interleukin 12B	Extracellular Space	cytokine
	IMM 947	NM_001124392	Oncorhynchus mykiss interleukin-12 beta chain (il12b) mRNA_x0001_emb-AJ548829.1- Oncorhynchus mykiss mRNA for interleukin-12 beta chain (il12b gene) large transcript	1.81	6.6e-05	IL12B		IL12B		interleukin 12B	Extracellular Space	cytokine
	IMM 947	NM_001124392	Oncorhynchus mykiss interleukin-12 beta chain (il12b) mRNA_x0001_emb-AJ548829.1- Oncorhynchus mykiss mRNA for interleukin-12 beta chain (il12b gene) large transcript	1.677	9.7e-05	IL12B		IL12B		interleukin 12B	Extracellular Space	cytokine
	IMM 948	AJ548830	Oncorhynchus mykiss mRNA for interleukin-12 beta chain (il12b gene) small transcript	1.571	3.7e-05	IL12B		IL12B		interleukin 12B	Extracellular Space	cytokine
	IMM 948	AJ548830	Oncorhynchus mykiss mRNA for interleukin-12 beta chain (il12b gene) small transcript	1.555	3.3e-05	IL12B		IL12B		interleukin 12B	Extracellular Space	cytokine
	IMM 948	AJ548830	Oncorhynchus mykiss mRNA for interleukin-12 beta chain (il12b gene) small transcript	1.429	7.1e-05	IL12B		IL12B		interleukin 12B	Extracellular Space	cytokine
	CUST_16_PI425348775	IL-12P40-2	0	1.267	8.9e-05	IL12B		IL12B		interleukin 12B	Extracellular Space	cytokine
	CUST_32_PI425348775	IL-2Rbeta1	0	2.136	3.7e-05	IL12RB		IL12RB1	1.975	interleukin 12 receptor subunit beta 1	Plasma Membrane	cell surface receptor
	CUST_32_PI425348775	IL-2Rbeta1	0	1.814	0.000638	IL12RB		IL12RB1		interleukin 12 receptor subunit beta 1	Plasma Membrane	cell surface receptor
	IMM 950	AJ548843	Oncorhynchus mykiss partial mRNA for interleukin-16 (il-16 gene)	1.761	0.034017	IL16		IL16	1.468	interleukin 16	Extracellular Space	cytokine
	IMM 950	AJ548843	Oncorhynchus mykiss partial mRNA for interleukin-16 (il-16 gene)	1.175	0.001267	IL16		IL16		interleukin 16	Extracellular Space	cytokine
	TC133989	AJ223954	Oncorhynchus mykiss mRNA for interleukin-1-beta	4.078	0	IL1B		IL1B	2.69246	interleukin 1 beta	Extracellular Space	cytokine
	CUST_86_PI420312184	AJ223954	Oncorhynchus mykiss mRNA for interleukin-1-beta	4.003	0	IL1B		IL1B		interleukin 1 beta	Extracellular Space	cytokine
	IMM 1054	AJ223954	Oncorhynchus mykiss mRNA for interleukin-1-beta	3.494	0	IL1B		IL1B		interleukin 1 beta	Extracellular Space	cytokine
	IMM 1054	AJ223954	Oncorhynchus mykiss mRNA for interleukin-1-beta	3.254	0	IL1B		IL1B		interleukin 1 beta	Extracellular Space	cytokine
	IMM 1054	AJ223954	Oncorhynchus mykiss mRNA for interleukin-1-beta	3.177	0	IL1B		IL1B		interleukin 1 beta	Extracellular Space	cytokine
	IMM 433	AJ004821	Oncorhynchus mykiss gene encoding interleukin-1 beta	2.489	0.003029	IL1B		IL1B		interleukin 1 beta	Extracellular Space	cytokine
	IMM 436	AJ298294	Oncorhynchus mykiss IL1B1S gene for interleukin-1 beta exons 1-6 and promoter region (IL1B1S gene)	2.311	0.001907	IL1B		IL1B		interleukin 1 beta	Extracellular Space	cytokine
	IMM 881	AJ223954	Oncorhynchus mykiss mRNA for interleukin-1-beta	2.178	0.005454	IL1B		IL1B		interleukin 1 beta	Extracellular Space	cytokine
	IMM 436	AJ298294	Oncorhynchus mykiss IL1B1S gene for interleukin-1 beta exons 1-6 and promoter region (IL1B1S gene)	2.174	2.6e-05	IL1B		IL1B		interleukin 1 beta	Extracellular Space	cytokine
	IMM 881	AJ223954	Oncorhynchus mykiss mRNA for interleukin-1-beta	2.144	0.007163	IL1B		IL1B		interleukin 1 beta	Extracellular Space	cytokine
	IMM 881	AJ223954	Oncorhynchus mykiss mRNA for interleukin-1-beta	2.038	0.007961	IL1B		IL1B		interleukin 1 beta	Extracellular Space	cytokine
	IMM 981	AJ971433	Oncorhynchus mykiss mRNA for lymphotoxin beta 1 (lt-b1 gene)	1.99	0.025771	IL1B		IL1B		interleukin 1 beta	Extracellular Space	cytokine
	IMM 433	AJ004821	Oncorhynchus mykiss gene encoding interleukin-1 beta	1.672	0.023482	IL1B		IL1B		interleukin 1 beta	Extracellular Space	cytokine
	TC136568	NM_001124355	Oncorhynchus mykiss interleukin-1 receptor type II (il-1rii) mRNA_x0001_emb-AJ276474.2- Oncorhynchus mykiss mRNA for interleukin-1 receptor type II (IL-1rII gene)	3.064	0	IL1R2		IL1R2	2.82075	interleukin 1 receptor type 2	Plasma Membrane	cell surface receptor
	IMM 886	NM_001124355	Oncorhynchus mykiss interleukin-1 receptor type II (il-1rii) mRNA_x0001_emb-AJ276474.2- Oncorhynchus mykiss mRNA for interleukin-1 receptor type II (IL-1rII gene)	2.895	0	IL1R2		IL1R2		interleukin 1 receptor type 2	Plasma Membrane	cell surface receptor
	IMM 886	NM_001124355	Oncorhynchus mykiss interleukin-1 receptor type II (il-1rii) mRNA_x0001_emb-AJ276474.2- Oncorhynchus mykiss mRNA for interleukin-1 receptor type II (IL-1rII gene)	2.753	0	IL1R2		IL1R2		interleukin 1 receptor type 2	Plasma Membrane	cell surface receptor
	IMM 886	NM_001124355	Oncorhynchus mykiss interleukin-1 receptor type II (il-1rii) mRNA_x0001_emb-AJ276474.2- Oncorhynchus mykiss mRNA for interleukin-1 receptor type II (IL-1rII gene)	2.571	1e-06	IL1R2		IL1R2		interleukin 1 receptor type 2	Plasma Membrane	cell surface receptor
	IMM 1052	NM_001124355	Oncorhynchus mykiss interleukin-1 receptor type II (il-1rii) mRNA_x0001_emb-AJ276474.2- Oncorhynchus mykiss mRNA for interleukin-1 receptor type II (IL-1rII gene)	3.188	1e-06	IL1RAPL2		IL1RAPL2	3.05	interleukin 1 receptor accessory protein like 2	Plasma Membrane	cell surface receptor
	IMM 1052	NM_001124355	Oncorhynchus mykiss interleukin-1 receptor type II (il-1rii) mRNA_x0001_emb-AJ276474.2- Oncorhynchus mykiss mRNA for interleukin-1 receptor type II (IL-1rII gene)	3.077	0	IL1RAPL2		IL1RAPL2		interleukin 1 receptor accessory protein like 2	Plasma Membrane	cell surface receptor
	IMM 1052	NM_001124355	Oncorhynchus mykiss interleukin-1 receptor type II (il-1rii) mRNA_x0001_emb-AJ276474.2- Oncorhynchus mykiss mRNA for interleukin-1 receptor type II (IL-1rII gene)	2.885	2e-06	IL1RAPL2		IL1RAPL2		interleukin 1 receptor accessory protein like 2	Plasma Membrane	cell surface receptor
	CUST_45_PI425348775	IL-20R1	0	1.351	0.00012	IL20RA		IL20RA	1.264	interleukin 20 receptor subunit alpha	Plasma Membrane	cell surface receptor
	CUST_45_PI425348775	IL-20R1	0	1.177	0.000865	IL20RA		IL20RA		interleukin 20 receptor subunit alpha	Plasma Membrane	cell surface receptor
	CUST_46_PI425348775	IL-21Ralpha	0	1.751	6e-06	IL21R		IL21R	1.748	interleukin 21 receptor	Plasma Membrane	cell surface receptor
	CUST_46_PI425348775	IL-21Ralpha	0	1.745	9e-06	IL21R		IL21R		interleukin 21 receptor	Plasma Membrane	cell surface receptor
	IMM 438	AJ310565	Oncorhynchus mykiss il-8 gene for putative interleukin 8 exons 1-4	2.98	0.000393	IL8		CXCL8	2.347	C-X-C motif chemokine ligand 8	Extracellular Space	cytokine
	IMM 901	AJ310565	Oncorhynchus mykiss il-8 gene for putative interleukin 8 exons 1-4	2.889	5.1e-05	IL8		CXCL8		C-X-C motif chemokine ligand 8	Extracellular Space	cytokine
	IMM 901	AJ310565	Oncorhynchus mykiss il-8 gene for putative interleukin 8 exons 1-4	2.879	3e-06	IL8		CXCL8		C-X-C motif chemokine ligand 8	Extracellular Space	cytokine
	IMM 438	AJ310565	Oncorhynchus mykiss il-8 gene for putative interleukin 8 exons 1-4	2.855	0.000378	IL8		CXCL8		C-X-C motif chemokine ligand 8	Extracellular Space	cytokine
	IMM 991	AY221022	Oncorhynchus mykiss interleukin 8X (IL-8) gene IL-8-X allele complete cds	2.42	4.6e-05	IL8		CXCL8		C-X-C motif chemokine ligand 8	Extracellular Space	cytokine
	IMM 438	AJ310565	Oncorhynchus mykiss il-8 gene for putative interleukin 8 exons 1-4	2.089	0.000153	IL8		CXCL8		C-X-C motif chemokine ligand 8	Extracellular Space	cytokine
	IMM 991	AY221022	Oncorhynchus mykiss interleukin 8X (IL-8) gene IL-8-X allele complete cds	1.473	0.028329	IL8		CXCL8		C-X-C motif chemokine ligand 8	Extracellular Space	cytokine
	IMM 991	AY221022	Oncorhynchus mykiss interleukin 8X (IL-8) gene IL-8-X allele complete cds	1.191	0.017939	IL8		CXCL8		C-X-C motif chemokine ligand 8	Extracellular Space	cytokine
	TC136654	BT060343	Salmo salar clone ssal-rgh-515-243 Inositol polyphosphate 1-phosphatase putative mRNA complete cds	2.272	0.0184	INPP1		INPP1	1.827	inositol polyphosphate-1-phosphatase	Cytoplasm	phosphatase
	TC150902	BT060343	Salmo salar clone ssal-rgh-515-243 Inositol polyphosphate 1-phosphatase putative mRNA complete cds	1.382	7e-06	INPP1		INPP1		inositol polyphosphate-1-phosphatase	Cytoplasm	phosphatase
	TC159300	HQ021732	Sparus aurata clone contig01026 genomic sequence	1.18	5.5e-05	IPO7		IPO7	1.136	importin 7	Nucleus	transporter
	TC136937	HQ021732	Sparus aurata clone contig01026 genomic sequence	1.092	0.000111	IPO7		IPO7		importin 7	Nucleus	transporter
	CUST_117_PI420312184	NM_001124293	Oncorhynchus mykiss interferon regulatory factor 1 (irf-1) mRNA_x0001_gb-AF332147.1- Oncorhynchus mykiss interferon regulatory factor 1 (IRF-1) mRNA complete cds	-1.058	0.000332	IRF1		IRF1	-1.49845	interferon regulatory factor 1	Nucleus	transcription regulator
	TC166646	NM_001124293	Oncorhynchus mykiss interferon regulatory factor 1 (irf-1) mRNA_x0001_gb-AF332147.1- Oncorhynchus mykiss interferon regulatory factor 1 (IRF-1) mRNA complete cds	-1.414	1.4e-05	IRF1		IRF1		interferon regulatory factor 1	Nucleus	transcription regulator
	IMM 616	FN806856	Salmo salar mRNA for interferon regulatory factor 1 isoform 2 (IRF1-2 gene)	-1.424	7e-06	IRF1		IRF1		interferon regulatory factor 1	Nucleus	transcription regulator
	IMM 260	FN806856	Salmo salar mRNA for interferon regulatory factor 1 isoform 2 (IRF1-2 gene)	-1.482	1.3e-05	IRF1		IRF1		interferon regulatory factor 1	Nucleus	transcription regulator
	IMM 260	FN806856	Salmo salar mRNA for interferon regulatory factor 1 isoform 2 (IRF1-2 gene)	-1.49	4e-06	IRF1		IRF1		interferon regulatory factor 1	Nucleus	transcription regulator
	IMM 616	FN806856	Salmo salar mRNA for interferon regulatory factor 1 isoform 2 (IRF1-2 gene)	-1.546	8e-06	IRF1		IRF1		interferon regulatory factor 1	Nucleus	transcription regulator
	TC159407	FN806856	Salmo salar mRNA for interferon regulatory factor 1 isoform 2 (IRF1-2 gene)	-1.557	7e-06	IRF1		IRF1		interferon regulatory factor 1	Nucleus	transcription regulator
	TC170556	FN806856	Salmo salar mRNA for interferon regulatory factor 1 isoform 2 (IRF1-2 gene)	-1.594	9e-06	IRF1		IRF1		interferon regulatory factor 1	Nucleus	transcription regulator
	TC159024	FN806856	Salmo salar mRNA for interferon regulatory factor 1 isoform 2 (IRF1-2 gene)	-1.598	1e-05	IRF1		IRF1		interferon regulatory factor 1	Nucleus	transcription regulator
	IMM 260	FN806856	Salmo salar mRNA for interferon regulatory factor 1 isoform 2 (IRF1-2 gene)	-1.646	1e-05	IRF1		IRF1		interferon regulatory factor 1	Nucleus	transcription regulator
	IMM 616	FN806856	Salmo salar mRNA for interferon regulatory factor 1 isoform 2 (IRF1-2 gene)	-1.674	4e-06	IRF1		IRF1		interferon regulatory factor 1	Nucleus	transcription regulator
	TC134142	NM_001124438	Oncorhynchus mykiss interferon regulatory factor 2 (irf2) mRNA_x0001_gb-AY034055.2- Oncorhynchus mykiss interferon regulatory-factor 2 mRNA complete cds	-1.19	5.5e-05	IRF2		IRF2	-1.3805	interferon regulatory factor 2	Nucleus	transcription regulator
	CUST_118_PI420312184	NM_001124438	Oncorhynchus mykiss interferon regulatory factor 2 (irf2) mRNA_x0001_gb-AY034055.2- Oncorhynchus mykiss interferon regulatory-factor 2 mRNA complete cds	-1.571	2.7e-05	IRF2		IRF2		interferon regulatory factor 2	Nucleus	transcription regulator
	TC151043	BT045871	Salmo salar clone ssal-rgf-535-096 Integral membrane protein 2C putative mRNA complete cds	1.664	1.4e-05	ITM2C		ITM2C	1.66	integral membrane protein 2C	Cytoplasm	other
	TC152650	BT045871	Salmo salar clone ssal-rgf-535-096 Integral membrane protein 2C putative mRNA complete cds	1.656	0.000704	ITM2C		ITM2C		integral membrane protein 2C	Cytoplasm	other
	TC169620	XM_001922333	PREDICTED: Danio rerio similar to inositol 134-triphosphate 5/6 kinase (LOC100148744) mRNA	2.483	0.005012	ITPK1		ITPK1	2.144	inositol-tetrakisphosphate 1-kinase	Cytoplasm	kinase
	TC153856	XM_001922333	PREDICTED: Danio rerio similar to inositol 134-triphosphate 5/6 kinase (LOC100148744) mRNA	1.805	0.004623	ITPK1		ITPK1		inositol-tetrakisphosphate 1-kinase	Cytoplasm	kinase
	TC137999	BT045224	Salmo salar clone ssal-rgf-515-291 Transcription factor AP-1 putative mRNA complete cds	2.685	0	JUN		JUN	1.9096	Jun proto-oncogene, AP-1 transcription factor subunit	Nucleus	transcription regulator
	TC160860	BT045224	Salmo salar clone ssal-rgf-515-291 Transcription factor AP-1 putative mRNA complete cds	2.438	0	JUN		JUN		Jun proto-oncogene, AP-1 transcription factor subunit	Nucleus	transcription regulator
	TC132389	NM_001124411	Oncorhynchus mykiss jun proto-oncogene (jun) mRNA_x0001_emb-AJ627207.1- Oncorhynchus mykiss mRNA for transcription factor AP-1 (jun gene)	2.399	0	JUN		JUN		Jun proto-oncogene, AP-1 transcription factor subunit	Nucleus	transcription regulator
	TC156564	BT045224	Salmo salar clone ssal-rgf-515-291 Transcription factor AP-1 putative mRNA complete cds	2.267	0	JUN		JUN		Jun proto-oncogene, AP-1 transcription factor subunit	Nucleus	transcription regulator
	IMM 454	NM_001124411	Oncorhynchus mykiss jun proto-oncogene (jun) mRNA_x0001_emb-AJ627207.1- Oncorhynchus mykiss mRNA for transcription factor AP-1 (jun gene)	2.018	3e-06	JUN		JUN		Jun proto-oncogene, AP-1 transcription factor subunit	Nucleus	transcription regulator
	IMM 454	NM_001124411	Oncorhynchus mykiss jun proto-oncogene (jun) mRNA_x0001_emb-AJ627207.1- Oncorhynchus mykiss mRNA for transcription factor AP-1 (jun gene)	1.839	2e-06	JUN		JUN		Jun proto-oncogene, AP-1 transcription factor subunit	Nucleus	transcription regulator
	TC147942	BT045224	Salmo salar clone ssal-rgf-515-291 Transcription factor AP-1 putative mRNA complete cds	1.707	1e-06	JUN		JUN		Jun proto-oncogene, AP-1 transcription factor subunit	Nucleus	transcription regulator
	IMM 454	NM_001124411	Oncorhynchus mykiss jun proto-oncogene (jun) mRNA_x0001_emb-AJ627207.1- Oncorhynchus mykiss mRNA for transcription factor AP-1 (jun gene)	1.538	7.8e-05	JUN		JUN		Jun proto-oncogene, AP-1 transcription factor subunit	Nucleus	transcription regulator
	IMM 116	BT059722	Salmo salar clone ssal-rgf-522-366 Transcription factor AP-1 putative mRNA complete cds	1.197	0.00028	JUN		JUN		Jun proto-oncogene, AP-1 transcription factor subunit	Nucleus	transcription regulator
	IMM 116	BT059722	Salmo salar clone ssal-rgf-522-366 Transcription factor AP-1 putative mRNA complete cds	1.008	0.001123	JUN		JUN		Jun proto-oncogene, AP-1 transcription factor subunit	Nucleus	transcription regulator
	IMM 416	NM_001124520	Oncorhynchus mykiss junB protein (LOC100136256) mRNA_x0001_gb-AY614595.1- Oncorhynchus mykiss junB protein mRNA complete cds	2.777	0	JUNB		JUNB	2.05386	JunB proto-oncogene, AP-1 transcription factor subunit	Nucleus	transcription regulator
	IMM 416	NM_001124520	Oncorhynchus mykiss junB protein (LOC100136256) mRNA_x0001_gb-AY614595.1- Oncorhynchus mykiss junB protein mRNA complete cds	2.768	0	JUNB		JUNB		JunB proto-oncogene, AP-1 transcription factor subunit	Nucleus	transcription regulator
	IMM 416	NM_001124520	Oncorhynchus mykiss junB protein (LOC100136256) mRNA_x0001_gb-AY614595.1- Oncorhynchus mykiss junB protein mRNA complete cds	2.5	0	JUNB		JUNB		JunB proto-oncogene, AP-1 transcription factor subunit	Nucleus	transcription regulator
	TC132801	NM_001124520	Oncorhynchus mykiss junB protein (LOC100136256) mRNA_x0001_gb-AY614595.1- Oncorhynchus mykiss junB protein mRNA complete cds	2.411	0	JUNB		JUNB		JunB proto-oncogene, AP-1 transcription factor subunit	Nucleus	transcription regulator
	TC160082	CR690290	Tetraodon nigroviridis full-length cDNA	2.319	1e-06	JUNB		JUNB		JunB proto-oncogene, AP-1 transcription factor subunit	Nucleus	transcription regulator
	TC156791	BT026598	Gasterosteus aculeatus clone CEC16-H09 mRNA sequence	2.082	1e-06	JUNB		JUNB		JunB proto-oncogene, AP-1 transcription factor subunit	Nucleus	transcription regulator
	IMM 1050	NM_001124520	Oncorhynchus mykiss junB protein (LOC100136256) mRNA_x0001_gb-AY614595.1- Oncorhynchus mykiss junB protein mRNA complete cds	2.013	1e-06	JUNB		JUNB		JunB proto-oncogene, AP-1 transcription factor subunit	Nucleus	transcription regulator
	IMM 1050	NM_001124520	Oncorhynchus mykiss junB protein (LOC100136256) mRNA_x0001_gb-AY614595.1- Oncorhynchus mykiss junB protein mRNA complete cds	1.952	1e-06	JUNB		JUNB		JunB proto-oncogene, AP-1 transcription factor subunit	Nucleus	transcription regulator
	IMM 1050	NM_001124520	Oncorhynchus mykiss junB protein (LOC100136256) mRNA_x0001_gb-AY614595.1- Oncorhynchus mykiss junB protein mRNA complete cds	1.897	1e-06	JUNB		JUNB		JunB proto-oncogene, AP-1 transcription factor subunit	Nucleus	transcription regulator
	TC158779	DQ285670	Xiphophorus maculatus JUN-B (JunB) gene complete cds	1.861	1.5e-05	JUNB		JUNB		JunB proto-oncogene, AP-1 transcription factor subunit	Nucleus	transcription regulator
	TC148637	DQ285670	Xiphophorus maculatus JUN-B (JunB) gene complete cds	1.774	1e-05	JUNB		JUNB		JunB proto-oncogene, AP-1 transcription factor subunit	Nucleus	transcription regulator
	IMM 493	NM_001124520	Oncorhynchus mykiss junB protein (LOC100136256) mRNA_x0001_gb-AY614595.1- Oncorhynchus mykiss junB protein mRNA complete cds	1.577	1e-06	JUNB		JUNB		JunB proto-oncogene, AP-1 transcription factor subunit	Nucleus	transcription regulator
	IMM 493	NM_001124520	Oncorhynchus mykiss junB protein (LOC100136256) mRNA_x0001_gb-AY614595.1- Oncorhynchus mykiss junB protein mRNA complete cds	1.458	1e-05	JUNB		JUNB		JunB proto-oncogene, AP-1 transcription factor subunit	Nucleus	transcription regulator
	IMM 493	NM_001124520	Oncorhynchus mykiss junB protein (LOC100136256) mRNA_x0001_gb-AY614595.1- Oncorhynchus mykiss junB protein mRNA complete cds	1.365	5.4e-05	JUNB		JUNB		JunB proto-oncogene, AP-1 transcription factor subunit	Nucleus	transcription regulator
	TC134787	NM_001139960	Salmo salar Junction plakoglobin (plak) mRNA_x0001_gb-BT044961.1- Salmo salar clone ssal-rgf-508-219 Junction plakoglobin putative mRNA complete cds	1.424	0.049319	JUP		JUP	1.2125	junction plakoglobin	Plasma Membrane	other
	TC152867	NM_001139960	Salmo salar Junction plakoglobin (plak) mRNA_x0001_gb-BT044961.1- Salmo salar clone ssal-rgf-508-219 Junction plakoglobin putative mRNA complete cds	1.001	0.000171	JUP		JUP		junction plakoglobin	Plasma Membrane	other
	TC143159	BT072220	Salmo salar clone ssal-rgf-517-158 Cell division cycle protein 23 homolog putative mRNA partial cds	-1.12	0.006625	KIF20A		KIF20A	-1.804	kinesin family member 20A	Cytoplasm	other
	TC142508	NM_001161470	Danio rerio kinesin family member 20A (LOC325449) mRNA	-2.488	0.012289	KIF20A		KIF20A		kinesin family member 20A	Cytoplasm	other
	TC169887	NM_001146353	Salmo salar Krueppel-like factor 2 (klf2) mRNA_x0001_gb-BT044789.1- Salmo salar clone ssal-rgf-503-311 Krueppel-like factor 2 putative mRNA complete cds	1.569	0.000273	KLF2		KLF2	1.22575	Kruppel like factor 2	Nucleus	transcription regulator
	TC147780	BC162393	Danio rerio Kruppel-like factor d mRNA (cDNA clone MGC:194069 IMAGE:9037816) complete cds	1.18	0.001919	KLF2		KLF2		Kruppel like factor 2	Nucleus	transcription regulator
	TC149223	NM_001146353	Salmo salar Krueppel-like factor 2 (klf2) mRNA_x0001_gb-BT044789.1- Salmo salar clone ssal-rgf-503-311 Krueppel-like factor 2 putative mRNA complete cds	1.13	0.004403	KLF2		KLF2		Kruppel like factor 2	Nucleus	transcription regulator
	TC162373	NM_001146353	Salmo salar Krueppel-like factor 2 (klf2) mRNA_x0001_gb-BT044789.1- Salmo salar clone ssal-rgf-503-311 Krueppel-like factor 2 putative mRNA complete cds	1.024	0.003131	KLF2		KLF2		Kruppel like factor 2	Nucleus	transcription regulator
	IMM 140	BT049640	Salmo salar clone ssal-eve-543-224 Krueppel-like factor 6 putative mRNA complete cds	2.109	1e-06	KLF6		KLF6	1.8172	Kruppel like factor 6	Nucleus	transcription regulator
	IMM 140	BT049640	Salmo salar clone ssal-eve-543-224 Krueppel-like factor 6 putative mRNA complete cds	1.937	5e-06	KLF6		KLF6		Kruppel like factor 6	Nucleus	transcription regulator
	IMM 140	BT049640	Salmo salar clone ssal-eve-543-224 Krueppel-like factor 6 putative mRNA complete cds	1.84	8e-06	KLF6		KLF6		Kruppel like factor 6	Nucleus	transcription regulator
	TC147949	BT049640	Salmo salar clone ssal-eve-543-224 Krueppel-like factor 6 putative mRNA complete cds	1.683	8e-06	KLF6		KLF6		Kruppel like factor 6	Nucleus	transcription regulator
	IMM 140	BT049640	Salmo salar clone ssal-eve-543-224 Krueppel-like factor 6 putative mRNA complete cds	1.517	2.9e-05	KLF6		KLF6		Kruppel like factor 6	Nucleus	transcription regulator
	TC171298	NM_001139979	Salmo salar kelch-like 6 (Drosophila) (klhl6) mRNA_x0001_gb-BT044996.1- Salmo salar clone ssal-rgf-509-166 Kelch-like protein 6 putative mRNA complete cds	1.892	5.3e-05	KLHL6		KLHL6	1.655	kelch like family member 6	Other	other
	TC142696	NM_001139979	Salmo salar kelch-like 6 (Drosophila) (klhl6) mRNA_x0001_gb-BT044996.1- Salmo salar clone ssal-rgf-509-166 Kelch-like protein 6 putative mRNA complete cds	1.418	3.6e-05	KLHL6		KLHL6		kelch like family member 6	Other	other
	TC158343	BT060257	Salmo salar clone ssal-rgh-511-105 Importin subunit alpha-2 putative mRNA complete cds	-1.335	0.001496	KPNA2		KPNA2	-1.535	karyopherin subunit alpha 2	Nucleus	transporter
	TC143306	BT060257	Salmo salar clone ssal-rgh-511-105 Importin subunit alpha-2 putative mRNA complete cds	-1.735	0.000302	KPNA2		KPNA2		karyopherin subunit alpha 2	Nucleus	transporter
	IMM 275	AJ427868	Oncorhynchus mykiss partial mRNA for Keratin 12 (k12 gene)	-1.029	0.000516	KRT15		KRT15	-1.043	keratin 15	Cytoplasm	other
	IMM 275	AJ427868	Oncorhynchus mykiss partial mRNA for Keratin 12 (k12 gene)	-1.057	0.000473	KRT15		KRT15		keratin 15	Cytoplasm	other
	TC160702	NM_001124376	Oncorhynchus mykiss keratin 13 (k13) mRNA_x0001_emb-AJ427867.1- Oncorhynchus mykiss mRNA for Keratin 13 (k13 gene)	-1.006	0.000319	KRT16		KRT16	-1.23533	keratin 16	Cytoplasm	other
	TC135240	NM_001124376	Oncorhynchus mykiss keratin 13 (k13) mRNA_x0001_emb-AJ427867.1- Oncorhynchus mykiss mRNA for Keratin 13 (k13 gene)	-1.319	0.000827	KRT16		KRT16		keratin 16	Cytoplasm	other
	TC140692	NM_001124376	Oncorhynchus mykiss keratin 13 (k13) mRNA_x0001_emb-AJ427867.1- Oncorhynchus mykiss mRNA for Keratin 13 (k13 gene)	-1.381	0.005765	KRT16		KRT16		keratin 16	Cytoplasm	other
	TC153905	NM_001123548	Salmo salar hypothetical protein LOC100136396 (LOC100136396) mRNA_x0001_emb-AJ312748.1- Salmo salar hypothetical protein ORF1	-1.426	0.001394	LALBA		LALBA	-1.63767	lactalbumin alpha	Extracellular Space	enzyme
	TC163465	NM_001123548	Salmo salar hypothetical protein LOC100136396 (LOC100136396) mRNA_x0001_emb-AJ312748.1- Salmo salar hypothetical protein ORF1	-1.698	0.001048	LALBA		LALBA		lactalbumin alpha	Extracellular Space	enzyme
	TC142727	NM_001123548	Salmo salar hypothetical protein LOC100136396 (LOC100136396) mRNA_x0001_emb-AJ312748.1- Salmo salar hypothetical protein ORF1	-1.789	0.001047	LALBA		LALBA		lactalbumin alpha	Extracellular Space	enzyme
	TC133909	not-annotated	not-annotated	3.235	0	LAMA3		LAMA3	2.65967	laminin subunit alpha 3	Extracellular Space	other
	TC170679	not-annotated	not-annotated	2.702	3.8e-05	LAMA3		LAMA3		laminin subunit alpha 3	Extracellular Space	other
	TC169302	XM_690939	PREDICTED: Danio rerio similar to laminin alpha 3 (LOC567640) mRNA	2.042	0.013419	LAMA3		LAMA3		laminin subunit alpha 3	Extracellular Space	other
	IMM 1002	AY471612	Oncorhynchus mykiss liver-expressed antimicrobial peptide 2 isoform A precursor (LEAP2A) gene complete cds	1.801	0.017149	LEAP2		LEAP2	1.449	liver enriched antimicrobial peptide 2	Extracellular Space	other
	IMM 993	NM_001124464	Oncorhynchus mykiss liver-expressed antimicrobial peptide 2A (leap-2a) mRNA_x0001_gb-AY362186.1- Oncorhynchus mykiss liver-expressed antimicrobial peptide 2A (LEAP-2A) mRNA complete cds	1.59	0.019671	LEAP2		LEAP2		liver enriched antimicrobial peptide 2	Extracellular Space	other
	IMM 994	NM_001124465	Oncorhynchus mykiss liver-expressed antimicrobial peptide 2B (leap-2b) mRNA_x0001_gb-AY362187.1- Oncorhynchus mykiss liver-expressed antimicrobial peptide 2B (LEAP-2B) mRNA complete cds	1.545	0.00466	LEAP2		LEAP2		liver enriched antimicrobial peptide 2	Extracellular Space	other
	TC132512	NM_001124465	Oncorhynchus mykiss liver-expressed antimicrobial peptide 2B (leap-2b) mRNA_x0001_gb-AY362187.1- Oncorhynchus mykiss liver-expressed antimicrobial peptide 2B (LEAP-2B) mRNA complete cds	1.479	0.005994	LEAP2		LEAP2		liver enriched antimicrobial peptide 2	Extracellular Space	other
	TC152168	NM_001124464	Oncorhynchus mykiss liver-expressed antimicrobial peptide 2A (leap-2a) mRNA_x0001_gb-AY362186.1- Oncorhynchus mykiss liver-expressed antimicrobial peptide 2A (LEAP-2A) mRNA complete cds	1.267	0.035309	LEAP2		LEAP2		liver enriched antimicrobial peptide 2	Extracellular Space	other
	IMM 565	NM_001124465	Oncorhynchus mykiss liver-expressed antimicrobial peptide 2B (leap-2b) mRNA_x0001_gb-AY362187.1- Oncorhynchus mykiss liver-expressed antimicrobial peptide 2B (LEAP-2B) mRNA complete cds	1.012	0.037754	LEAP2		LEAP2		liver enriched antimicrobial peptide 2	Extracellular Space	other
	IMM 191	BT073343	Oncorhynchus mykiss clone omyk-evn-514-035 Beta-galactoside-binding lectin putative mRNA complete cds	1.129	0.000398	LGALS1		LGALS1	1.087	galectin 1	Extracellular Space	other
	TC134057	BT073343	Oncorhynchus mykiss clone omyk-evn-514-035 Beta-galactoside-binding lectin putative mRNA complete cds	1.045	0.002364	LGALS1		LGALS1		galectin 1	Extracellular Space	other
	TC137377	BT045332	Salmo salar clone ssal-rgf-518-256 Leucine-rich repeat-containing protein 58 putative mRNA complete cds	1.562	0.000231	LRRC58		LRRC58	1.4915	leucine rich repeat containing 58	Other	other
	TC143743	BT045332	Salmo salar clone ssal-rgf-518-256 Leucine-rich repeat-containing protein 58 putative mRNA complete cds	1.421	2.5e-05	LRRC58		LRRC58		leucine rich repeat containing 58	Other	other
	TC155119	BT125522	Salmo salar clone ssal-rgb2-610-340 fibronectin type-III domain-containing protein UNQ728/PRO1410 homolog precursor putative mRNA complete cds	2.165	1.2e-05	LRRN4		LRRN4	1.86433	leucine rich repeat neuronal 4	Plasma Membrane	other
	TC158355	not-annotated	not-annotated	1.947	0	LRRN4		LRRN4		leucine rich repeat neuronal 4	Plasma Membrane	other
	TC157492	BT125522	Salmo salar clone ssal-rgb2-610-340 fibronectin type-III domain-containing protein UNQ728/PRO1410 homolog precursor putative mRNA complete cds	1.481	8.7e-05	LRRN4		LRRN4		leucine rich repeat neuronal 4	Plasma Membrane	other
	IMM 466	NM_001124425	Oncorhynchus mykiss lymphotoxin beta 2 (lt-b2) mRNA_x0001_emb-AJ971434.1- Oncorhynchus mykiss mRNA for lymphotoxin beta 2 (lt-b2 gene)	3.209	0	LTB		LTB	3.084	lymphotoxin beta	Extracellular Space	cytokine
	IMM 466	NM_001124425	Oncorhynchus mykiss lymphotoxin beta 2 (lt-b2) mRNA_x0001_emb-AJ971434.1- Oncorhynchus mykiss mRNA for lymphotoxin beta 2 (lt-b2 gene)	3.114	2e-05	LTB		LTB		lymphotoxin beta	Extracellular Space	cytokine
	IMM 466	NM_001124425	Oncorhynchus mykiss lymphotoxin beta 2 (lt-b2) mRNA_x0001_emb-AJ971434.1- Oncorhynchus mykiss mRNA for lymphotoxin beta 2 (lt-b2 gene)	2.929	1e-06	LTB		LTB		lymphotoxin beta	Extracellular Space	cytokine
	TC135398	not-annotated	not-annotated	2.216	6e-06	LTB4R		LTB4R	1.856	leukotriene B4 receptor	Plasma Membrane	G-protein coupled receptor
	TC156636	XM_002662721	PREDICTED: Danio rerio leukotriene B4 receptor 1-like (LOC100329657) mRNA	1.496	0.005749	LTB4R		LTB4R		leukotriene B4 receptor	Plasma Membrane	G-protein coupled receptor
	TC134273	BT057862	Salmo salar clone ssal-rgb2-576-272 Acyl-protein thioesterase 2 putative mRNA complete cds	1.211	0.04776	LYPLA2		LYPLA2	1.211	lysophospholipase 2	Cytoplasm	enzyme
	TC134273	BT057862	Salmo salar clone ssal-rgb2-576-272 Acyl-protein thioesterase 2 putative mRNA complete cds	1.211	0.04776	LYPLA2		LYPLA2		lysophospholipase 2	Cytoplasm	enzyme
	IMM 288	BT060237	Salmo salar clone ssal-rgh-510-202 Lymphatic vessel endothelial hyaluronic acid receptor 1 precursor putative mRNA complete cds	2.486	1e-06	LYVE1		LYVE1	2.3795	lymphatic vessel endothelial hyaluronan receptor 1	Plasma Membrane	cell surface receptor
	IMM 288	BT060237	Salmo salar clone ssal-rgh-510-202 Lymphatic vessel endothelial hyaluronic acid receptor 1 precursor putative mRNA complete cds	2.373	1.1e-05	LYVE1		LYVE1		lymphatic vessel endothelial hyaluronan receptor 1	Plasma Membrane	cell surface receptor
	IMM 288	BT060237	Salmo salar clone ssal-rgh-510-202 Lymphatic vessel endothelial hyaluronic acid receptor 1 precursor putative mRNA complete cds	2.365	7e-06	LYVE1		LYVE1		lymphatic vessel endothelial hyaluronan receptor 1	Plasma Membrane	cell surface receptor
	TC161513	NM_001141251	Salmo salar Lymphatic vessel endothelial hyaluronic acid receptor 1 (xlkd1) mRNA_x0001_gb-BT048800.1- Salmo salar clone ssal-eve-509-295 Lymphatic vessel endothelial hyaluronic acid receptor 1 precursor putative mRNA complete cds	2.294	2e-06	LYVE1		LYVE1		lymphatic vessel endothelial hyaluronan receptor 1	Plasma Membrane	cell surface receptor
	TC170128	NM_001139612	Salmo salar v-maf musculoaponeurotic fibrosarcoma oncogene-like (maffl) mRNA_x0001_gb-BT043547.1- Salmo salar clone HM4_1986 v-maf musculoaponeurotic fibrosarcoma oncogene-like (maffl) mRNA complete cds	1.645	0.000186	MAFF		MAFF	1.43433	MAF bZIP transcription factor F	Nucleus	transcription regulator
	TC150282	NM_001139612	Salmo salar v-maf musculoaponeurotic fibrosarcoma oncogene-like (maffl) mRNA_x0001_gb-BT043547.1- Salmo salar clone HM4_1986 v-maf musculoaponeurotic fibrosarcoma oncogene-like (maffl) mRNA complete cds	1.424	1.5e-05	MAFF		MAFF		MAF bZIP transcription factor F	Nucleus	transcription regulator
	TC136388	NM_001139612	Salmo salar v-maf musculoaponeurotic fibrosarcoma oncogene-like (maffl) mRNA_x0001_gb-BT043547.1- Salmo salar clone HM4_1986 v-maf musculoaponeurotic fibrosarcoma oncogene-like (maffl) mRNA complete cds	1.234	6.1e-05	MAFF		MAFF		MAF bZIP transcription factor F	Nucleus	transcription regulator
	TC146978	BT050155	Salmo salar clone ssal-evf-516-263 ARMET precursor putative mRNA complete cds	2.053	1.7e-05	MANF		MANF	1.596	mesencephalic astrocyte derived neurotrophic factor	Extracellular Space	other
	TC161375	BT050155	Salmo salar clone ssal-evf-516-263 ARMET precursor putative mRNA complete cds	1.434	2.2e-05	MANF		MANF		mesencephalic astrocyte derived neurotrophic factor	Extracellular Space	other
	TC136939	BT050155	Salmo salar clone ssal-evf-516-263 ARMET precursor putative mRNA complete cds	1.301	0.000287	MANF		MANF		mesencephalic astrocyte derived neurotrophic factor	Extracellular Space	other
	TC145319	EU069828	Oncorhynchus mykiss mitogen-activated protein kinase kinase kinase kinase 4-like protein gene partial cds	1.758	1e-06	MAP4K4		MAP4K4	1.319	mitogen-activated protein kinase kinase kinase kinase 4	Cytoplasm	kinase
	CUST_56_PI420312184	EU069828	Oncorhynchus mykiss mitogen-activated protein kinase kinase kinase kinase 4-like protein gene partial cds	1.139	0.000148	MAP4K4		MAP4K4		mitogen-activated protein kinase kinase kinase kinase 4	Cytoplasm	kinase
	TC160173	EU069828	Oncorhynchus mykiss mitogen-activated protein kinase kinase kinase kinase 4-like protein gene partial cds	1.06	0.000209	MAP4K4		MAP4K4		mitogen-activated protein kinase kinase kinase kinase 4	Cytoplasm	kinase
	TC163737	AY134883	Mus musculus mitogen-activated protein kinase 6 (Map) gene exon 6 and complete cds	1.812	2.3e-05	MAPK6		MAPK6	1.588	mitogen-activated protein kinase 6	Cytoplasm	kinase
	TC156262	not-annotated	not-annotated	1.364	0.000142	MAPK6		MAPK6		mitogen-activated protein kinase 6	Cytoplasm	kinase
	TC152134	DQ207960	Paralichthys olivaceus microsatellite OF102 sequence	2.294	0	MARCKSL1		MARCKSL1	2.2225	MARCKS like 1	Cytoplasm	other
	TC143529	DQ207960	Paralichthys olivaceus microsatellite OF102 sequence	2.151	0	MARCKSL1		MARCKSL1		MARCKS like 1	Cytoplasm	other
	IMM 1058	BT071873	Salmo salar clone ssal-rgf-501-166 Induced myeloid leukemia cell differentiation protein Mcl-1 putative mRNA pseudogene cds	1.424	3.4e-05	MCL1		MCL1	1.241	MCL1 apoptosis regulator, BCL2 family member	Cytoplasm	transporter
	IMM 1058	BT071873	Salmo salar clone ssal-rgf-501-166 Induced myeloid leukemia cell differentiation protein Mcl-1 putative mRNA pseudogene cds	1.351	1.8e-05	MCL1		MCL1		MCL1 apoptosis regulator, BCL2 family member	Cytoplasm	transporter
	TC133121	BT071873	Salmo salar clone ssal-rgf-501-166 Induced myeloid leukemia cell differentiation protein Mcl-1 putative mRNA pseudogene cds	1.128	0.00029	MCL1		MCL1		MCL1 apoptosis regulator, BCL2 family member	Cytoplasm	transporter
	CUST_31_PI420312184	BT072198	Salmo salar clone ssal-rgf-516-146 Induced myeloid leukemia cell differentiation protein Mcl-1 putative mRNA pseudogene cds	1.061	0.000792	MCL1		MCL1		MCL1 apoptosis regulator, BCL2 family member	Cytoplasm	transporter
	TC136542	BT072027	Salmo salar clone ssal-rgf-508-057 DNA replication licensing factor mcm2 putative mRNA partial cds	-1.076	0.001421	MCM2		MCM2	-1.47675	minichromosome maintenance complex component 2	Nucleus	enzyme
	TC157789	BT072027	Salmo salar clone ssal-rgf-508-057 DNA replication licensing factor mcm2 putative mRNA partial cds	-1.116	0.008742	MCM2		MCM2		minichromosome maintenance complex component 2	Nucleus	enzyme
	TC167129	BT072027	Salmo salar clone ssal-rgf-508-057 DNA replication licensing factor mcm2 putative mRNA partial cds	-1.44	9e-05	MCM2		MCM2		minichromosome maintenance complex component 2	Nucleus	enzyme
	TC160731	BT072027	Salmo salar clone ssal-rgf-508-057 DNA replication licensing factor mcm2 putative mRNA partial cds	-2.275	0.012987	MCM2		MCM2		minichromosome maintenance complex component 2	Nucleus	enzyme
	TC153038	HQ287747	Coregonus clupeaformis malate dehydrogenase cytoplasmic (MDH) gene complete cds	-1.201	0.00013	MDH1		MDH1	-1.59733	malate dehydrogenase 1	Cytoplasm	enzyme
	TC169915	HQ287747	Coregonus clupeaformis malate dehydrogenase cytoplasmic (MDH) gene complete cds	-1.28	0.000966	MDH1		MDH1		malate dehydrogenase 1	Cytoplasm	enzyme
	TC162818	HQ287747	Coregonus clupeaformis malate dehydrogenase cytoplasmic (MDH) gene complete cds	-2.311	0.001349	MDH1		MDH1		malate dehydrogenase 1	Cytoplasm	enzyme
	IMM 120	GQ910766	Oncorhynchus keta clone Oke077.MED26 genomic sequence	2.244	0.000529	MED26		MED26	1.516	mediator complex subunit 26	Nucleus	transcription regulator
	TC144143	GQ910766	Oncorhynchus keta clone Oke077.MED26 genomic sequence	1.695	0.001024	MED26		MED26		mediator complex subunit 26	Nucleus	transcription regulator
	IMM 120	GQ910766	Oncorhynchus keta clone Oke077.MED26 genomic sequence	1.403	0.000558	MED26		MED26		mediator complex subunit 26	Nucleus	transcription regulator
	IMM 120	GQ910766	Oncorhynchus keta clone Oke077.MED26 genomic sequence	1.183	0.00398	MED26		MED26		mediator complex subunit 26	Nucleus	transcription regulator
	TC134382	XM_003275793	PREDICTED: Nomascus leucogenys mediator of RNA polymerase II transcription subunit 26-like (LOC100588789) mRNA	1.055	0.000537	MED26		MED26		mediator complex subunit 26	Nucleus	transcription regulator
	TC146158	not-annotated	not-annotated	1.113	0.000205	METRNL		METRNL	1.0825	meteorin like, glial cell differentiation regulator	Cytoplasm	other
	TC162931	not-annotated	not-annotated	1.052	0.000394	METRNL		METRNL		meteorin like, glial cell differentiation regulator	Cytoplasm	other
	TC160786	BT075674	Osmerus mordax clone omor-eva-514-090 Microsomal glutathione S-transferase 1 putative mRNA complete cds	-1.206	0.014285	MGST1		MGST1	-1.52867	microsomal glutathione S-transferase 1	Cytoplasm	enzyme
	TC139201	BT075674	Osmerus mordax clone omor-eva-514-090 Microsomal glutathione S-transferase 1 putative mRNA complete cds	-1.662	0.002755	MGST1		MGST1		microsomal glutathione S-transferase 1	Cytoplasm	enzyme
	TC142126	BT075674	Osmerus mordax clone omor-eva-514-090 Microsomal glutathione S-transferase 1 putative mRNA complete cds	-1.718	0.000107	MGST1		MGST1		microsomal glutathione S-transferase 1	Cytoplasm	enzyme
	TC171336	BT048803	Salmo salar clone ssal-rgb2-624-214 Mid1-interacting protein 1 putative mRNA complete cds	1.596	7e-06	MID1IP1		MID1IP1	1.4905	MID1 interacting protein 1	Cytoplasm	other
	TC140314	BT048883	Salmo salar clone ssal-rgb2-629-143 Mid1-interacting protein 1 putative mRNA complete cds	1.385	4.2e-05	MID1IP1		MID1IP1		MID1 interacting protein 1	Cytoplasm	other
	TC148436	FQ310507	Dicentrarchus labrax chromosome sequence corresponding to linkage group 1 bottom part complete sequence	1.468	3.6e-05	MKL1		MRTFA	1.2625	myocardin related transcription factor A	Nucleus	transcription regulator
	TC156905	FQ310507	Dicentrarchus labrax chromosome sequence corresponding to linkage group 1 bottom part complete sequence	1.057	0.001321	MKL1		MRTFA		myocardin related transcription factor A	Nucleus	transcription regulator
	IMM 725	BT060383	Salmo salar clone ssal-rgh-518-066 Collagenase 3 precursor putative mRNA complete cds	2.827	1e-06	MMP13		MMP13	1.97533	matrix metallopeptidase 13	Extracellular Space	peptidase
	IMM 725	BT060383	Salmo salar clone ssal-rgh-518-066 Collagenase 3 precursor putative mRNA complete cds	2.664	1e-06	MMP13		MMP13		matrix metallopeptidase 13	Extracellular Space	peptidase
	IMM 725	BT060383	Salmo salar clone ssal-rgh-518-066 Collagenase 3 precursor putative mRNA complete cds	2.613	1e-06	MMP13		MMP13		matrix metallopeptidase 13	Extracellular Space	peptidase
	TC132896	BT060383	Salmo salar clone ssal-rgh-518-066 Collagenase 3 precursor putative mRNA complete cds	2.225	7.2e-05	MMP13		MMP13		matrix metallopeptidase 13	Extracellular Space	peptidase
	TC162883	BT060383	Salmo salar clone ssal-rgh-518-066 Collagenase 3 precursor putative mRNA complete cds	2.108	0.000143	MMP13		MMP13		matrix metallopeptidase 13	Extracellular Space	peptidase
	IMM 879	AJ006411	Oncorhynchus mykiss mRNA for collagenase 3 partial	1.434	0.000373	MMP13		MMP13		matrix metallopeptidase 13	Extracellular Space	peptidase
	IMM 879	AJ006411	Oncorhynchus mykiss mRNA for collagenase 3 partial	1.419	0.000168	MMP13		MMP13		matrix metallopeptidase 13	Extracellular Space	peptidase
	IMM 879	AJ006411	Oncorhynchus mykiss mRNA for collagenase 3 partial	1.313	0.000595	MMP13		MMP13		matrix metallopeptidase 13	Extracellular Space	peptidase
	TC147381	NM_001124199	Oncorhynchus mykiss matrix metalloproteinase (mmp) mRNA_x0001_dbj-AB043536.1- Oncorhynchus mykiss mmp mRNA for matrix metalloproteinase complete cds	1.175	0.007362	MMP13		MMP13		matrix metallopeptidase 13	Extracellular Space	peptidase
	TC171935	GU552297	Salmo salar clone BAC 24B13 genomic sequence	2.27	0.00363	MOGAT2		MOGAT2	2.1075	monoacylglycerol O-acyltransferase 2	Cytoplasm	enzyme
	TC139544	AY915536	Schistosoma japonicum SJCHGC07523 protein mRNA partial cds	1.945	0.002387	MOGAT2		MOGAT2		monoacylglycerol O-acyltransferase 2	Cytoplasm	enzyme
	TC137047	NM_001141131	Salmo salar myeloid cell leukemia sequence 1b (mcl1b) mRNA_x0001_gb-BT048368.1- Salmo salar clone ssal-rgb2-501-309 L-Myc-1b putative mRNA complete cds	-1.268	0.000837	MYCL1		MYCL	-1.75933	MYCL proto-oncogene, bHLH transcription factor	Nucleus	transcription regulator
	TC147899	NM_001141131	Salmo salar myeloid cell leukemia sequence 1b (mcl1b) mRNA_x0001_gb-BT048368.1- Salmo salar clone ssal-rgb2-501-309 L-Myc-1b putative mRNA complete cds	-1.841	2.1e-05	MYCL1		MYCL		MYCL proto-oncogene, bHLH transcription factor	Nucleus	transcription regulator
	TC143086	NM_001141131	Salmo salar myeloid cell leukemia sequence 1b (mcl1b) mRNA_x0001_gb-BT048368.1- Salmo salar clone ssal-rgb2-501-309 L-Myc-1b putative mRNA complete cds	-2.169	0.002233	MYCL1		MYCL		MYCL proto-oncogene, bHLH transcription factor	Nucleus	transcription regulator
	TC147808	BC049302	Danio rerio nuclear receptor co-repressor 1 mRNA (cDNA clone IMAGE:5604262) containing frame-shift errors	1.873	0.019019	NCOR1		NCOR1	1.658	nuclear receptor corepressor 1	Nucleus	transcription regulator
	TC156874	XM_001102940	PREDICTED: Macaca mulatta nuclear receptor co-repressor 2 transcript variant 4 (NCOR2) mRNA	1.443	0.021114	NCOR1		NCOR1		nuclear receptor corepressor 1	Nucleus	transcription regulator
	TC169458	BT074060	Oncorhynchus mykiss clone omyk-evo-512-381 NF-kappa-B inhibitor alpha putative mRNA complete cds	1.283	5e-05	NFKBIA		NFKBIA	1.149	NFKB inhibitor alpha	Cytoplasm	transcription regulator
	IMM 922	NM_001124368	Oncorhynchus mykiss inhibitor of nuclear factor kappa B alpha (LOC100136058) mRNA_x0001_emb-AJ317969.1- Oncorhynchus mykiss mRNA for inhibitor of nuclear factor kappa B alpha (i kappa B alpha gene)	1.015	0.000405	NFKBIA		NFKBIA		NFKB inhibitor alpha	Cytoplasm	transcription regulator
	TC161664	BT071825	Salmo salar clone ssal-rgf-001-044 Nucleophosmin putative mRNA partial cds	1.365	0.000459	NPM1		NPM1	1.214	nucleophosmin 1	Nucleus	transcription regulator
	IMM 327	BT071825	Salmo salar clone ssal-rgf-001-044 Nucleophosmin putative mRNA partial cds	1.192	8e-05	NPM1		NPM1		nucleophosmin 1	Nucleus	transcription regulator
	IMM 327	BT071825	Salmo salar clone ssal-rgf-001-044 Nucleophosmin putative mRNA partial cds	1.172	8.2e-05	NPM1		NPM1		nucleophosmin 1	Nucleus	transcription regulator
	IMM 327	BT071825	Salmo salar clone ssal-rgf-001-044 Nucleophosmin putative mRNA partial cds	1.171	8.4e-05	NPM1		NPM1		nucleophosmin 1	Nucleus	transcription regulator
	TC163491	BT071825	Salmo salar clone ssal-rgf-001-044 Nucleophosmin putative mRNA partial cds	1.17	6e-05	NPM1		NPM1		nucleophosmin 1	Nucleus	transcription regulator
	TC164252	NM_001139679	Salmo salar 5'-nucleotidase cytosolic III (nt5c3) mRNA_x0001_gb-BT043689.1- Salmo salar clone HM5_2053 5'-nucleotidase cytosolic 3 (nt5c3) mRNA complete cds	1.134	0.000443	NT5C3A		NT5C3A	1.13	5'-nucleotidase, cytosolic IIIA	Cytoplasm	phosphatase
	TC159417	BT072020	Salmo salar clone ssal-rgf-507-320 Cytosolic 5-nucleotidase III putative mRNA pseudogene cds	1.126	0.008223	NT5C3A		NT5C3A		5'-nucleotidase, cytosolic IIIA	Cytoplasm	phosphatase
	TC144550	BT048359	Salmo salar clone ssal-eve-502-114 Nuclear protein 1 putative mRNA complete cds	1.546	5.9e-05	NUPR1		NUPR1	1.4485	nuclear protein 1, transcriptional regulator	Nucleus	transcription regulator
[truncated: 1,258 more rows]
