# Supplementary material for: Gill Transcriptomic Responses to Toxin-producing Alga Prymnesium parvum in Rainbow Trout
Source: Front Immunol. 2021 Dec 8;12:794593. doi: 10.3389/fimmu.2021.794593 (PMC8693183; doi:10.3389/fimmu.2021.794593)
Supplement: Supplementary file 7 [file Table_2.xlsx]

## Sheet: Suppl Table 2
	Supplementary Table 2. List of differentially expressed RNA targets in the gills of rainbow trout from HM vs control groups (HM, high exposure/moderate response), with the cut-off criteria
	at adjusted p-value < 0.05 and absolute Log2 FC > 1. The RNA targets (representing fish genes) were mapped to human orthologs (BLASTX, E-value < 0.00001, top hit) to generate
	HGNC gene identifiers (HGNC, HUGO Gene Nomenclature Committee). Only RNA targets with the unique HGNC gene identifiers (834 human genes) and the multiple RNA targets
	mapped to the same HGNC identifier with the same direction of change (235 human genes for which the multiple Log2 FC values were averaged) were subjected to functional analysis,
	yielding in total 1069 human orthologs. When submitted to Ingenuity Pathway Analysis (IPA), 1061 of the 1069 human orthologs were recognised as analysis-ready (for information
	retrieved from IPA see columns I and K–M). The remaining 8 genes (not analysis-ready) are denoted by a hyphen (-).
	Probe ID/RNA target	Fish gene ID	Fish gene description	Log2 FC	adj p-value	HGNC symbol		HGNC symbol by IPA	mean Log2 FC	HGNC gene name	Location	Type
	RNA targets mapped to the unique HGNC gene identifiers (1 RNA target → 1 unique HGNC gene identifier)
	TC139787	NM_001141564	Salmo salar LisH domain-containing protein C16orf63 homolog (cp063) mRNA_x0001_gb-BT050165.2- Salmo salar clone ssal-eve-505-190 LisH domain-containing protein C16orf63 homolog putative mRNA complete cds	6.609	0.00284	FOPNL		CEP20	6.609	centrosomal protein 20	Cytoplasm	other
	TC165047	BT072777	Salmo salar clone ssal-rgf-540-072 Cyclic AMP-dependent transcription factor ATF-4 putative mRNA pseudogene cds	6.529	0.000172	ATF4		ATF4	6.529	activating transcription factor 4	Nucleus	transcription regulator
	TC160539	CR711242	Tetraodon nigroviridis full-length cDNA	5.469	0.000267	GTPBP2		GTPBP2	5.469	GTP binding protein 2	Extracellular Space	enzyme
	TC152709	AM982800	Oncorhynchus mykiss csf-3 gene for granulocyte colony-stimulating factor exons 1-5	5.298	1.2e-05	CSF3		CSF3	5.298	colony stimulating factor 3	Extracellular Space	cytokine
	TC133229	NM_001173914	Salmo salar 35 kDa SR repressor protein (srr35) mRNA_x0001_gb-BT059492.1- Salmo salar clone ssal-rgf-516-225 35 kDa SR repressor protein putative mRNA complete cds	3.938	5.7e-05	Srsf10		-	3.938	-	-	-
	TC160535	BX510646	Zebrafish DNA sequence from clone CH211-221B16 in linkage group 9 Contains the gene for a novel protein with Zinc finger C3HC4 type (RING finger) and B-box zinc finger domains the 5' end of the mycbp2 gene for MYC binding protein 2 the gene for a novel protein similar to vertebrate kelch repeat and BTB (POZ) domain the scel gene for sciellin the gene for a novel protein similar to vertebrate RAB3…	3.785	0.002654	THOC1		THOC1	3.785	THO complex 1	Nucleus	transcription regulator
	TC157811	NM_001124297	Oncorhynchus mykiss growth hormone-releasing hormone/pituitary adenylate cyclase-activating polypeptide (LOC100135955) mRNA_x0001_gb-AF343976.1-AF343976 Oncorhynchus mykiss growth hormone-releasing hormone/pituitary adenylate cyclase-activating polypeptide mRNA complete cds alternatively spliced	3.533	0.003128	ADCYAP1		ADCYAP1	3.533	adenylate cyclase activating polypeptide 1	Extracellular Space	other
	TC163374	NM_001173933	Salmo salar Glutamate decarboxylase-like protein 1 (gadl1) mRNA_x0001_gb-BT059173.1- Salmo salar clone ssal-rgf-530-029 Glutamate decarboxylase-like protein 1 putative mRNA complete cds	3.431	0	GADL1		GADL1	3.431	glutamate decarboxylase like 1	Cytoplasm	enzyme
	TC133055	BT075244	Osmerus mordax clone omor-rgc-510-377 Alpha-N-acetylgalactosaminide alpha-26-sialyltransferase 2 putative mRNA complete cds	3.342	0.001939	ST6GALNAC2		ST6GALNAC2	3.342	ST6 N-acetylgalactosaminide alpha-2,6-sialyltransferase 2	Cytoplasm	enzyme
	TC133985	tpg-BK006398.1-	TPA_exp: Salmo salar claudin 25a pseudogene mRNA complete sequence	3.319	0.034395	CLDN15		CLDN15	3.319	claudin 15	Plasma Membrane	other
	TC162975	BT072576	Salmo salar clone ssal-rgf-531-075 Ubiquitin carboxyl-terminal hydrolase isozyme L5 putative mRNA pseudogene cds	3.301	0	UCHL5		UCHL5	3.301	ubiquitin C-terminal hydrolase L5	Cytoplasm	peptidase
	TC157741	not-annotated	not-annotated	3.223	0	ADAMTS1		ADAMTS1	3.223	ADAM metallopeptidase with thrombospondin type 1 motif 1	Extracellular Space	peptidase
	TC152665	GQ200818	Sparus aurata copper transporting ATPase 2 (ATP7B) mRNA complete cds	3.198	0.006647	ATP7B		ATP7B	3.198	ATPase copper transporting beta	Cytoplasm	transporter
	TC149008	BT049284	Salmo salar clone ssal-evd-526-271 Gastrotropin putative mRNA complete cds	3.147	0	FABP6		FABP6	3.147	fatty acid binding protein 6	Cytoplasm	transporter
	TC132660	not-annotated	not-annotated	3.129	0.037527	SPATA22		SPATA22	3.129	spermatogenesis associated 22	Other	other
	TC138778	BT072616	Salmo salar clone ssal-rgf-532-215 Transposable element Tcb2 transposase putative mRNA pseudogene cds	3.122	1e-06	CD1C		CD1C	3.122	CD1c molecule	Plasma Membrane	other
	TC134790	not-annotated	not-annotated	3.108	0	LPAR6		LPAR6	3.108	lysophosphatidic acid receptor 6	Plasma Membrane	G-protein coupled receptor
	TC148747	NM_001139922	Salmo salar akt interacting protein (aktip) mRNA_x0001_gb-BT044885.1- Salmo salar clone ssal-rgf-506-177 AKT-interacting protein putative mRNA complete cds	3.049	0.036402	AKTIP		AKTIP	3.049	AKT interacting protein	Cytoplasm	other
	TC168316	XM_696143	PREDICTED: Danio rerio e3 ubiquitin-protein ligase HACE1-like (LOC572430) mRNA	2.995	2.3e-05	HACE1		HACE1	2.995	HECT domain and ankyrin repeat containing E3 ubiquitin protein ligase 1	Cytoplasm	enzyme
	TC136463	not-annotated	not-annotated	2.95	2e-06	ADAM19		ADAM19	2.95	ADAM metallopeptidase domain 19	Plasma Membrane	peptidase
	TC168111	GU108576	Oncorhynchus mykiss BDNF (BDNF) mRNA partial cds	2.925	2e-06	BDNF		BDNF	2.925	brain derived neurotrophic factor	Extracellular Space	growth factor
	TC171904	NM_001114437	Danio rerio zgc:175108 (zgc:175108) mRNA_x0001_gb-BC155323.1- Danio rerio zgc:175108 mRNA (cDNA clone MGC:175108 IMAGE:6959935) complete cds	2.913	0.037208	FAM5C		BRINP3	2.913	BMP/retinoic acid inducible neural specific 3	Cytoplasm	other
	TC143505	BT074136	Oncorhynchus mykiss clone omyk-evo-502-066 CXorf33 precursor putative mRNA complete cds	2.908	0	APOO		APOO	2.908	apolipoprotein O	Extracellular Space	other
	TC151826	BT125488	Salmo salar clone ssal-eve-512-106 C-C motif chemokine 20 precursor putative mRNA complete cds	2.872	0.013382	CCL16		CCL16	2.872	C-C motif chemokine ligand 16	Extracellular Space	cytokine
	TC155870	not-annotated	not-annotated	2.806	0	FRRS1		FRRS1	2.806	ferric chelate reductase 1	Plasma Membrane	cell surface receptor
	TC166418	FJ392682	Gadus morhua hemoglobin alpha 2 chain mRNA complete cds	2.735	0.021067	HBZ		HBZ	2.735	hemoglobin subunit zeta	Cytoplasm	transporter
	TC137564	BT057040	Salmo salar clone ssal-evd-565-177 Leukocyte surface antigen CD53 putative mRNA complete cds	2.689	0.029028	CD53		CD53	2.689	CD53 molecule	Plasma Membrane	other
	TC160355	DQ291141	Oncorhynchus mykiss vasotocin receptor mRNA partial cds	2.646	0.007234	AVPR1A		AVPR1A	2.646	arginine vasopressin receptor 1A	Plasma Membrane	G-protein coupled receptor
	TC146677	BT125402	Salmo salar clone ssal-eve-577-357 Tryptophan-rich protein putative mRNA complete cds	2.635	0.034836	WRB		GET1	2.635	guided entry of tail-anchored proteins factor 1	Extracellular Space	other
	TC160372	NM_001141378	Salmo salar M-phase phosphoprotein 6 (mph6) mRNA_x0001_gb-BT049342.1- Salmo salar clone ssal-eve-558-278 M-phase phosphoprotein 6 putative mRNA complete cds	2.604	0.029138	MPHOSPH6		MPHOSPH6	2.604	M-phase phosphoprotein 6	Nucleus	other
	TC165719	NM_001139730	Salmo salar phosphoglycerate mutase 2-2 (muscle) (LOC100194645) mRNA_x0001_gb-BT043849.1- Salmo salar clone HM5_3002 phosphoglycerate mutase 2-2 (muscle) mRNA complete cds	2.561	0.022042	PGAM2		PGAM2	2.561	phosphoglycerate mutase 2	Cytoplasm	phosphatase
	TC157629	U65229	Makaira nigricans sarcoplasmic/endoplasmic reticulum calcium ATPase 1B mRNA complete cds	2.548	0.032983	ATP2A2		ATP2A2	2.548	ATPase sarcoplasmic/endoplasmic reticulum Ca2+ transporting 2	Cytoplasm	transporter
	TC154825	BT045770	Salmo salar clone ssal-rgf-530-353 Eukaryotic translation initiation factor 5 putative mRNA complete cds	2.532	0.002974	EIF5		EIF5	2.532	eukaryotic translation initiation factor 5	Cytoplasm	translation regulator
	TC147900	BT045815	Salmo salar clone ssal-rgf-532-088 Calcium-binding mitochondrial carrier protein Aralar1 putative mRNA complete cds	2.523	0.031472	SLC25A12		SLC25A12	2.523	solute carrier family 25 member 12	Cytoplasm	transporter
	TC155036	BC067669	Danio rerio cDNA clone IMAGE:6966429 partial cds	2.496	0.001516	TOM1		TOM1	2.496	target of myb1 membrane trafficking protein	Cytoplasm	transporter
	TC163106	BT027597	Gasterosteus aculeatus clone CGX58-C04 mRNA sequence	2.492	0.002128	MMP19		MMP19	2.492	matrix metallopeptidase 19	Extracellular Space	peptidase
	TC151711	not-annotated	not-annotated	2.454	0	SLC5A3		SLC5A3	2.454	solute carrier family 5 member 3	Plasma Membrane	transporter
	TC165690	BT059596	Salmo salar clone ssal-rgf-516-344 U2 small nuclear ribonucleoprotein B putative mRNA complete cds	2.441	0.014226	SNRPB2		SNRPB2	2.441	small nuclear ribonucleoprotein polypeptide B2	Nucleus	other
	TC150131	not-annotated	not-annotated	2.412	0.003351	EMR3		ADGRE3	2.412	adhesion G protein-coupled receptor E3	Plasma Membrane	G-protein coupled receptor
	TC163318	FJ195617	Salmo salar Indian hedgehog mRNA partial cds	2.408	0.003478	SHH		SHH	2.408	sonic hedgehog signaling molecule	Extracellular Space	peptidase
	TC147730	NM_001111160	Danio rerio prostaglandin I2 (prostacyclin) synthase (ptgis) mRNA_x0001_gb-EU236593.1- Danio rerio prostaglandin I2 synthase (PGIS) mRNA complete cds	2.402	0	PTGIS		PTGIS	2.402	prostaglandin I2 synthase	Cytoplasm	enzyme
	TC140579	BT050084	Salmo salar clone ssal-evf-564-311 MORN repeat-containing protein 3 putative mRNA complete cds	2.387	0.009077	MORN3		MORN3	2.387	MORN repeat containing 3	Nucleus	other
	TC138811	NM_001124516	Oncorhynchus mykiss regulator of G-protein signalling 14 (LOC100136252) mRNA_x0001_gb-AY606041.1- Oncorhynchus mykiss regulator of G-protein signalling 14 mRNA complete cds	2.337	9.4e-05	RGS12		RGS12	2.337	regulator of G protein signaling 12	Nucleus	enzyme
	TC162751	HQ287746	Coregonus clupeaformis heat shock cognate 70 kDa protein (HSP70) gene partial cds	2.324	0.002056	LCMT1		LCMT1	2.324	leucine carboxyl methyltransferase 1	Cytoplasm	enzyme
	TC140127	NM_001140121	Salmo salar IMM ediate early response 2 (ier2) mRNA_x0001_gb-BT045276.1- Salmo salar clone ssal-rgf-517-071 IMM ediate early response gene 2 protein putative mRNA complete cds	2.322	1.5e-05	IER2		IER2	2.322	immediate early response 2	Cytoplasm	transcription regulator
	TC135750	BT027026	Gasterosteus aculeatus clone CFW154-B07 mRNA sequence	2.322	0.034826	TPST1		TPST1	2.322	tyrosylprotein sulfotransferase 1	Cytoplasm	enzyme
	TC169665	not-annotated	not-annotated	2.31	0.009828	RRBP1		RRBP1	2.31	ribosome binding protein 1	Cytoplasm	other
	TC163339	NM_001173630	Salmo salar RING finger protein 139 (rn139) mRNA_x0001_gb-BT059110.1- Salmo salar clone ssal-rgf-526-049 RING finger protein 139 putative mRNA complete cds	2.308	0.022956	RNF139		RNF139	2.308	ring finger protein 139	Cytoplasm	enzyme
	CUST_29_PI420312184	BT059485	Salmo salar clone ssal-rgf-516-265 Cyclic AMP-dependent transcription factor ATF-3 putative mRNA complete cds	2.304	1e-06	ATF3		ATF3	2.304	activating transcription factor 3	Nucleus	transcription regulator
	TC159727	not-annotated	not-annotated	2.303	0.015976	BTLA		BTLA	2.303	B and T lymphocyte associated	Plasma Membrane	other
	TC171240	XM_001372035	PREDICTED: Monodelphis domestica similar to neuregulin 1 (LOC100019114) mRNA	2.303	0.009944	NRG1		NRG1	2.303	neuregulin 1	Plasma Membrane	growth factor
	TC149583	not-annotated	not-annotated	2.284	1.4e-05	PPAP2A		PLPP1	2.284	phospholipid phosphatase 1	Plasma Membrane	phosphatase
	TC165246	BT073110	Oncorhynchus mykiss clone omyk-evn-511-317 60S ribosomal protein L36 putative mRNA complete cds	2.282	1e-06	RPL36		RPL36	2.282	ribosomal protein L36	Cytoplasm	other
	TC141710	NM_001140097	Salmo salar transglutaminase 1 (K polypeptide epidermal type I protein-glutamine-gamma-glutamyltransferase) (tgm1) mRNA_x0001_gb-BT045232.1- Salmo salar clone ssal-rgf-515-349 Protein-glutamine gamma-glutamyltransferase K putative mRNA complete cds	2.247	3e-06	TGM1		TGM1	2.247	transglutaminase 1	Plasma Membrane	enzyme
	TC137694	XM_002661465	PREDICTED: Danio rerio phenylserine dehydratase-like (LOC100331498) mRNA	2.244	0.048504	SRR		SRR	2.244	serine racemase	Cytoplasm	enzyme
	TC162094	NM_001141273	Salmo salar LIM domain and actin binding 1 (lima1) mRNA_x0001_gb-BT048876.2- Salmo salar clone ssal-eve-506-175 LIM domain and actin-binding protein 1 putative mRNA complete cds	2.238	3e-06	LIMA1		LIMA1	2.238	LIM domain and actin binding 1	Cytoplasm	other
	TC146452	XM_684788	PREDICTED: Danio rerio zinc finger protein 91-like (LOC561377) mRNA	2.237	0.023216	ZKSCAN4		ZKSCAN4	2.237	zinc finger with KRAB and SCAN domains 4	Nucleus	transcription regulator
	TC163255	AJ579373	Oncorhynchus mykiss partial mRNA for angiotensinogen precursor (agt gene)	2.236	0.00698	AGT		AGT	2.236	angiotensinogen	Extracellular Space	growth factor
	TC159135	NM_001140524	Salmo salar Collagenase 3 (mmp13) mRNA_x0001_gb-BT046016.1- Salmo salar clone ssal-rgf-539-134 Collagenase 3 precursor putative mRNA complete cds	2.229	9e-06	MMP3		MMP3	2.229	matrix metallopeptidase 3	Extracellular Space	peptidase
	TC139544	AY915536	Schistosoma japonicum SJCHGC07523 protein mRNA partial cds	2.2	0.001245	MOGAT2		MOGAT2	2.2	monoacylglycerol O-acyltransferase 2	Cytoplasm	enzyme
	TC167577	XR_026874	PREDICTED: Gallus gallus similar to KIAA1867 protein (LOC419719) mRNA	2.192	0.027115	KIRREL3		KIRREL3	2.192	kirre like nephrin family adhesion molecule 3	Extracellular Space	other
	TC158604	not-annotated	not-annotated	2.192	3.3e-05	SSH1		SSH1	2.192	slingshot protein phosphatase 1	Cytoplasm	phosphatase
	TC134509	not-annotated	not-annotated	2.181	1.7e-05	C17orf97		C17orf97	2.181	chromosome 17 open reading frame 97	Other	other
	TC148206	not-annotated	not-annotated	2.177	4.6e-05	C1QL2		C1QL2	2.177	complement C1q like 2	Extracellular Space	other
	TC134799	XM_001920543	PREDICTED: Danio rerio wu:fa92h04 (wu:fa92h04) mRNA	2.171	0.019328	MAP3K5		MAP3K5	2.171	mitogen-activated protein kinase kinase kinase 5	Cytoplasm	kinase
	TC161943	BT072547	Salmo salar clone ssal-rgf-529-355 CD81 antigen putative mRNA pseudogene cds	2.167	0.013869	CD81		CD81	2.167	CD81 molecule	Plasma Membrane	other
	IMM 467	FM211190	Oncorhynchus mykiss mRNA for leptin (lep gene) isolated from kidney	2.164	0.044175	LEP		LEP	2.164	leptin	Extracellular Space	growth factor
	TC149924	not-annotated	not-annotated	2.159	0	PPP1R15B		PPP1R15B	2.159	protein phosphatase 1 regulatory subunit 15B	Cytoplasm	phosphatase
	TC136782	BT059729	Salmo salar clone ssal-rgf-537-311 Transcription factor jun-D putative mRNA complete cds	2.131	7e-06	JUND		JUND	2.131	JunD proto-oncogene, AP-1 transcription factor subunit	Nucleus	transcription regulator
	TC137721	NM_001140813	Salmo salar E3 ubiquitin-protein ligase LINCR (lincr) mRNA_x0001_gb-BT047112.1- Salmo salar clone ssal-eve-522-230 E3 ubiquitin-protein ligase LINCR putative mRNA complete cds	2.129	3.8e-05	NEURL1B		NEURL1B	2.129	neuralized E3 ubiquitin protein ligase 1B	Other	enzyme
	TC148631	NM_001139981	Salmo salar peroxisome biogenesis factor 10 (pex10) mRNA_x0001_gb-BT045001.1- Salmo salar clone ssal-rgf-509-223 Peroxisome assembly protein 10 putative mRNA complete cds	2.129	9e-06	PEX10		PEX10	2.129	peroxisomal biogenesis factor 10	Cytoplasm	other
	TC158766	AJ320156	Oncorhynchus mykiss iip1 gene for interferon inducible protein 1 exons 1-2	2.114	2.9e-05	IFITM3		IFITM3	2.114	interferon induced transmembrane protein 3	Plasma Membrane	other
	TC143302	not-annotated	not-annotated	2.104	1e-06	SSH2		SSH2	2.104	slingshot protein phosphatase 2	Cytoplasm	phosphatase
	TC163645	BT059832	Salmo salar clone ssal-rgg-504-047 Spindle and kinetochore-associated protein 2 putative mRNA complete cds	2.097	3e-06	SKA2		SKA2	2.097	spindle and kinetochore associated complex subunit 2	Nucleus	other
	TC146965	BX255917	Zebrafish DNA sequence from clone DKEY-1H6 in linkage group 20 Contains the gene for a novel protein (zgc:153349) the gene for a novel zinc finger protein the gene for a novel protein (zgc:153157) the gene for a transposase the gene for a novel protein similar to vertebrate methylenetetrahydrofolate dehydrogenase (NADP+ dependent) methenyltetrahydrofolate cyclohydrolase formyltetrahydrofolate syn…	2.09	2.5e-05	ZBTB1		ZBTB1	2.09	zinc finger and BTB domain containing 1	Nucleus	transcription regulator
	TC160118	HM210102	Danio rerio polo-like kinase 3 mRNA complete cds	2.068	0.000268	PLK3		PLK3	2.068	polo like kinase 3	Nucleus	kinase
	TC143881	XM_002186709	PREDICTED: Taeniopygia guttata zinc finger protein 64 (LOC100232153) partial mRNA	2.062	0.022319	ZFP64		ZFP64	2.062	ZFP64 zinc finger protein	Nucleus	transcription regulator
	TC142156	XM_002663403	PREDICTED: Danio rerio protein FAM188B-like (LOC100332565) mRNA	2.054	0.027159	FAM188B		MINDY4	2.054	MINDY lysine 48 deubiquitinase 4	Other	other
	TC163091	BC165610	Danio rerio ERO1-like (S. cerevisiae) mRNA (cDNA clone MGC:192698 IMAGE:100061157) complete cds	2.05	0.000172	ERO1L		ERO1A	2.05	endoplasmic reticulum oxidoreductase 1 alpha	Cytoplasm	enzyme
	IMM 1029	AY650050	Oncorhynchus mykiss strain OSU-142 clone 2 CD83 gene promoter region and partial cds	2.04	0.033439	CD83		CD83	2.04	CD83 molecule	Plasma Membrane	cell surface receptor
	TC134707	not-annotated	not-annotated	2.033	0.000197	DUSP2		DUSP2	2.033	dual specificity phosphatase 2	Nucleus	phosphatase
	TC167146	FQ310507	Dicentrarchus labrax chromosome sequence corresponding to linkage group 1 bottom part complete sequence	2.02	0.037663	NARF		NARF	2.02	nuclear prelamin A recognition factor	Nucleus	enzyme
	TC139045	BC165187	Danio rerio sperm associated antigen 6 mRNA (cDNA clone MGC:193049 IMAGE:100060672) complete cds	2.012	0.009532	SPAG6		SPAG6	2.012	sperm associated antigen 6	Cytoplasm	other
	TC156872	NM_001139916	Salmo salar Filamin-binding LIM protein 1 (fbli1) mRNA_x0001_gb-BT044877.1- Salmo salar clone ssal-rgf-506-108 Filamin-binding LIM protein 1 putative mRNA complete cds	1.988	0.000756	FBLIM1		FBLIM1	1.988	filamin binding LIM protein 1	Plasma Membrane	other
	TC169570	CR724636	Tetraodon nigroviridis full-length cDNA	1.987	7e-06	PLEK2		PLEK2	1.987	pleckstrin 2	Plasma Membrane	other
	TC168742	BT026752	Gasterosteus aculeatus clone CFW23-B09 mRNA sequence	1.985	0.008974	PAQR8		PAQR8	1.985	progestin and adipoQ receptor family member 8	Plasma Membrane	other
	TC149030	NM_001173815	Salmo salar opposite strand transcription unit to Stag3 (gats) mRNA_x0001_gb-BT059567.1- Salmo salar clone ssal-rgf-517-299 GATS putative mRNA complete cds	1.968	0.010606	GATSL3		CASTOR1	1.968	cytosolic arginine sensor for mTORC1 subunit 1	Cytoplasm	other
	TC138777	NM_001141209	Salmo salar Cell death activator CIDE-3 (cidec) mRNA_x0001_gb-BT048671.1- Salmo salar clone ssal-evd-565-241 Cell death activator CIDE-3 putative mRNA complete cds	1.964	1e-06	CIDEC		CIDEC	1.964	cell death inducing DFFA like effector c	Cytoplasm	other
	TC154495	NM_001104831	Oryzias latipes tissue-type plasminogen activator (tpa) mRNA_x0001_dbj-AB178522.1- Oryzias latipes tPA mRNA for tissue-type plasminogen activator complete cds	1.959	7e-06	TMPRSS11B		TMPRSS11B	1.959	transmembrane serine protease 11B	Cytoplasm	peptidase
	TC136211	BT056488	Salmo salar clone ssal-evf-513-150 Growth arrest and DNA-damage-inducible protein GADD45 alpha putative mRNA complete cds	1.955	1.1e-05	GADD45A		GADD45A	1.955	growth arrest and DNA damage inducible alpha	Nucleus	other
	TC144422	NM_001172549	Oncorhynchus mykiss carbonic anhydrase II (ca2) mRNA_x0001_gb-AY514870.1- Oncorhynchus mykiss cytoplasmic carbonic anhydrase (CA2) mRNA complete cds	1.951	9.9e-05	CA2		CA2	1.951	carbonic anhydrase 2	Cytoplasm	enzyme
	TC138392	NM_001165146	Oncorhynchus mykiss 5-AMP-activated protein kinase subunit beta-1 (aakb1) mRNA_x0001_gb-BT074088.1- Oncorhynchus mykiss clone omyk-evo-514-088 5-AMP-activated protein kinase subunit beta-1 putative mRNA complete cds	1.946	0.017776	PRKAB1		PRKAB1	1.946	protein kinase AMP-activated non-catalytic subunit beta 1	Nucleus	kinase
	TC140914	BC142601	Danio rerio si:ch211-276g21.1 mRNA (cDNA clone MGC:162970 IMAGE:8106707) complete cds	1.942	0.046361	DLG3		DLG3	1.942	discs large MAGUK scaffold protein 3	Plasma Membrane	kinase
	TC156380	NM_001037569	Danio rerio zgc:123248 (zgc:123248) mRNA_x0001_gb-BC110109.1- Danio rerio zgc:123248 mRNA (cDNA clone MGC:123248 IMAGE:7889486) complete cds	1.937	0.012596	INPP5A		INPP5A	1.937	inositol polyphosphate-5-phosphatase A	Plasma Membrane	phosphatase
	TC160847	BT060085	Salmo salar clone ssal-rgh-502-021 DCN1-like protein 5 putative mRNA complete cds	1.929	0.042276	DCUN1D5		DCUN1D5	1.929	defective in cullin neddylation 1 domain containing 5	Other	other
	TC169976	not-annotated	not-annotated	1.918	3e-06	NHS		NHS	1.918	NHS actin remodeling regulator	Nucleus	other
	TC142193	BT072619	Salmo salar clone ssal-rgf-532-257 unknown large open reading frame mRNA novel cds	1.911	0.028386	TNIP1		TNIP1	1.911	TNFAIP3 interacting protein 1	Nucleus	other
	TC163315	AF063216	Oncorhynchus keta insulin-like growth factor I precursor (IGF-I.1) gene complete cds	1.91	0.009918	PLEKHG5		PLEKHG5	1.91	pleckstrin homology and RhoGEF domain containing G5	Cytoplasm	other
	TC138035	NM_001173596	Salmo salar Cysteine-rich secretory protein LCCL domain-containing 2 (crld2) mRNA_x0001_gb-BT059013.1- Salmo salar clone ssal-rgf-520-134 Cysteine-rich secretory protein LCCL domain-containing 2 precursor putative mRNA complete cds	1.908	4.5e-05	CRISPLD2		CRISPLD2	1.908	cysteine rich secretory protein LCCL domain containing 2	Cytoplasm	other
	TC136272	BT045043	Salmo salar clone ssal-rgf-510-202 Signal recognition particle receptor subunit beta putative mRNA complete cds	1.891	0.04337	SRPRB		SRPRB	1.891	SRP receptor subunit beta	Cytoplasm	other
	TC142091	BT049175	Salmo salar clone ssal-eve-525-347 Dual specificity protein phosphatase 5 putative mRNA complete cds	1.888	8e-06	DUSP5		DUSP5	1.888	dual specificity phosphatase 5	Nucleus	phosphatase
	TC139558	NM_001160518	Oncorhynchus mykiss BolA-like protein 2 (bola2) mRNA_x0001_gb-BT073042.1- Oncorhynchus mykiss clone omyk-evn-504-326 BolA-like protein 2 putative mRNA complete cds	1.886	0.033922	BOLA2B		BOLA2/BOLA2B	1.886	bolA family member 2	Cytoplasm	enzyme
	TC153937	NM_001045268	Danio rerio YY1 associated factor 2 (yaf2) mRNA_x0001_gb-BC116594.1- Danio rerio YY1 associated factor 2 mRNA (cDNA clone MGC:136577 IMAGE:7294132) complete cds	1.881	0.000233	YAF2		YAF2	1.881	YY1 associated factor 2	Nucleus	transcription regulator
	CUST_1_PI425348775	NP_001182113	Oncorhynchus mykiss GMCSF	1.872	0.008411	GMCSF		-	1.872	-	-	-
	TC161495	FQ310506	Dicentrarchus labrax chromosome sequence corresponding to linkage group 1 top part complete sequence	1.869	0.04711	ITIH3		ITIH3	1.869	inter-alpha-trypsin inhibitor heavy chain 3	Extracellular Space	other
	TC159386	CU463315	Zebrafish DNA sequence from clone CH73-243G21 in linkage group 5 complete sequence	1.867	2.2e-05	SMTN		SMTN	1.867	smoothelin	Extracellular Space	other
	TC165207	not-annotated	not-annotated	1.865	0.000418	PSG8		PSG8	1.865	pregnancy specific beta-1-glycoprotein 8	Other	other
	TC153633	NM_001141915	Salmo salar RNA polymerase II-associated protein 3 (rpap3) mRNA_x0001_gb-BT045894.1- Salmo salar clone ssal-rgf-535-381 RNA polymerase II-associated protein 3 putative mRNA complete cds	1.863	0.020374	CEACAM1		CEACAM1	1.863	CEA cell adhesion molecule 1	Plasma Membrane	transporter
	TC172601	not-annotated	not-annotated	1.854	1.4e-05	PML		PML	1.854	promyelocytic leukemia	Nucleus	transcription regulator
	TC147099	FJ455497	Oreochromis niloticus thrombospondin-1b mRNA complete cds	1.841	9.8e-05	THBS1		THBS1	1.841	thrombospondin 1	Extracellular Space	other
	TC148084	not-annotated	not-annotated	1.839	0.014477	RAPGEF2		RAPGEF2	1.839	Rap guanine nucleotide exchange factor 2	Cytoplasm	other
	TC163284	AM229304	Salmo salar partial pparb2B gene for peroxisome proliferator-activated receptor beta2B exon 5 isolate farm-reared#1	1.837	0.000533	PPARD		PPARD	1.837	peroxisome proliferator activated receptor delta	Nucleus	ligand-dependent nuclear receptor
	TC151167	AF063216	Oncorhynchus keta insulin-like growth factor I precursor (IGF-I.1) gene complete cds	1.821	0.000173	IGF1		IGF1	1.821	insulin like growth factor 1	Extracellular Space	growth factor
	TC167864	NM_001141460	Salmo salar Tumor-associated calcium signal transducer 2 (tacd2) mRNA_x0001_gb-BT049742.1- Salmo salar clone ssal-evf-545-016 Tumor-associated calcium signal transducer 2 precursor putative mRNA complete cds	1.815	2e-06	TACSTD2		TACSTD2	1.815	tumor associated calcium signal transducer 2	Plasma Membrane	other
	TC161545	NM_001030265	Danio rerio zgc:114107 (zgc:114107) mRNA_x0001_gb-BC097167.1- Danio rerio zgc:114107 mRNA (cDNA clone MGC:114107 IMAGE:7448987) complete cds	1.815	0.000232	UBTD1		UBTD1	1.815	ubiquitin domain containing 1	Other	other
	TC154299	NM_001141803	Salmo salar GTPase activating protein (SH3 domain) binding protein 2 (g3bp2) mRNA_x0001_gb-BT045877.1- Salmo salar clone ssal-rgf-535-191 Ras GTPase-activating protein-binding protein 2 putative mRNA complete cds	1.813	1.9e-05	G3BP1		G3BP1	1.813	G3BP stress granule assembly factor 1	Nucleus	enzyme
	TC132802	AY864082	Oncorhynchus mykiss hexokinase 1 (HK1) mRNA partial cds	1.811	0.001496	HK1		HK1	1.811	hexokinase 1	Cytoplasm	kinase
	TC159398	AY819034	Danio rerio SAP-97A mRNA complete cds	1.81	0.036822	DLG1		DLG1	1.81	discs large MAGUK scaffold protein 1	Plasma Membrane	kinase
	TC158965	NM_001140052	Salmo salar DnaJ homolog subfamily B member 1 (dnjb1) mRNA_x0001_gb-BT045145.1- Salmo salar clone ssal-rgf-513-142 DnaJ homolog subfamily B member 1 putative mRNA complete cds	1.809	8.4e-05	DNAJB5		DNAJB5	1.809	DnaJ heat shock protein family (Hsp40) member B5	Cytoplasm	other
	TC149369	NM_001193624	Gallus gallus dishevelled associated activator of morphogenesis 1 (DAAM1) mRNA	1.803	1.7e-05	DAAM1		DAAM1	1.803	dishevelled associated activator of morphogenesis 1	Cytoplasm	other
	TC156824	BT059092	Salmo salar clone ssal-rgf-524-260 WD repeat and SOF domain-containing protein 1 putative mRNA complete cds	1.792	0.038633	DCAF13		DCAF13	1.792	DDB1 and CUL4 associated factor 13	Nucleus	other
	CUST_28_PI420312184	FJ455497	Oreochromis niloticus thrombospondin-1b mRNA complete cds	1.792	2.9e-05	THBS2		THBS2	1.792	thrombospondin 2	Extracellular Space	other
	TC140670	BT125215	Salmo salar clone ssal-eve-557-106 Retinol dehydrogenase 12 putative mRNA complete cds	1.789	0.000655	RDH12		RDH12	1.789	retinol dehydrogenase 12	Cytoplasm	enzyme
	TC134526	BT027393	Gasterosteus aculeatus clone CFW265-A06 mRNA sequence	1.776	2.1e-05	RASSF8		RASSF8	1.776	Ras association domain family member 8	Extracellular Space	other
	TC151127	BT075192	Osmerus mordax clone omor-eva-507-053 ADP-ribosylation factor-like protein 5B putative mRNA complete cds	1.765	6.5e-05	ARL5B		ARL5B	1.765	ADP ribosylation factor like GTPase 5B	Other	enzyme
	TC144392	BT060402	Salmo salar clone ssal-rgh-519-024 Cathepsin S precursor putative mRNA complete cds	1.763	0.039485	CTSS		CTSS	1.763	cathepsin S	Cytoplasm	peptidase
	TC132519	not-annotated	not-annotated	1.762	0.000132	FITM2		FITM2	1.762	fat storage inducing transmembrane protein 2	Cytoplasm	other
	TC133303	NM_001141526	Salmo salar Pleckstrin homology-like domain family A member 2 (phla2) mRNA_x0001_gb-BT050012.1- Salmo salar clone ssal-eve-579-162 Pleckstrin homology-like domain family A member 2 putative mRNA complete cds	1.752	4e-06	PHLDA2		PHLDA2	1.752	pleckstrin homology like domain family A member 2	Cytoplasm	other
	TC134871	NM_001164765	Salmo salar leptin receptor (lepr) mRNA_x0001_dbj-AB489201.1- Salmo salar LEPR mRNA for leptin receptor complete cds	1.749	4.9e-05	LEPR		LEPR	1.749	leptin receptor	Plasma Membrane	cell surface receptor
	TC139384	not-annotated	not-annotated	1.745	8.1e-05	UGDH		UGDH	1.745	UDP-glucose 6-dehydrogenase	Nucleus	enzyme
	TC160090	NM_001140382	Salmo salar fibrinogen-like 2 (fgl2) mRNA_x0001_gb-BT045764.1- Salmo salar clone ssal-rgf-530-311 Fibroleukin precursor putative mRNA complete cds	1.742	2.3e-05	FGL2		FGL2	1.742	fibrinogen like 2	Extracellular Space	peptidase
	TC140612	EU221180	Salmo salar clone 272P16 chaperonin gene complete cds; myosin 1 gene partial cds; and TCR-gamma locus partial sequence	1.735	0.005374	C5orf54		ZBED8	1.735	zinc finger BED-type containing 8	Nucleus	other
	TC137923	BC054659	Danio rerio LSM14 homolog A (SCD6 S. cerevisiae) mRNA (cDNA clone MGC:66203 IMAGE:5914276) complete cds	1.734	0.042107	LSM14A		LSM14A	1.734	LSM14A mRNA processing body assembly factor	Cytoplasm	other
	TC150222	not-annotated	not-annotated	1.729	0.002031	SAMD9L		SAMD9L	1.729	sterile alpha motif domain containing 9 like	Extracellular Space	other
	TC165910	EF427379	Salmo salar clone BAC CHORI214-8I14 complete sequence	1.727	2e-05	ZBTB22		ZBTB22	1.727	zinc finger and BTB domain containing 22	Nucleus	transcription regulator
	TC148761	AY036580	Schistosoma japonicum Cs2 protein mRNA complete cds	1.721	0.046366	MYO18B		MYO18B	1.721	myosin XVIIIB	Cytoplasm	other
	TC164662	BT072698	Salmo salar clone ssal-rgf-537-067 6-phosphofructo-2-kinase/fructose-26-biphosphatase 3 putative mRNA partial cds	1.72	4.8e-05	PFKFB3		PFKFB3	1.72	6-phosphofructo-2-kinase/fructose-2,6-biphosphatase 3	Cytoplasm	kinase
	TC142930	XM_001338200	PREDICTED: Danio rerio peroxisome proliferator-activated receptor gamma coactivator-related 1 (pprc1) mRNA	1.714	1.4e-05	PPRC1		PPRC1	1.714	PPARG related coactivator 1	Nucleus	transcription regulator
	TC165366	BT072448	Salmo salar clone ssal-rgf-525-359 Transketolase-like protein 2 putative mRNA partial cds	1.706	0.03025	TKTL2		TKTL2	1.706	transketolase like 2	Cytoplasm	enzyme
	TC156803	XM_003200128	PREDICTED: Danio rerio plectin-like (LOC567310) mRNA	1.692	0.045156	PLEC		PLEC	1.692	plectin	Cytoplasm	other
	TC157886	AJ717301	Oncorhynchus mykiss mRNA for vascular endothelial growth factor precursor (vegf gene) isoform VEGF122	1.691	0.00016	VEGFA		VEGFA	1.691	vascular endothelial growth factor A	Extracellular Space	growth factor
	TC141262	BT125236	Salmo salar clone ssal-rgb2-595-290 Cholesterol 25-hydroxylase-like protein A putative mRNA complete cds	1.686	3e-06	CH25H		CH25H	1.686	cholesterol 25-hydroxylase	Cytoplasm	enzyme
	TC145113	BT074061	Oncorhynchus mykiss clone omyk-evo-512-383 Leukocyte cysteine proteinase inhibitor 1 putative mRNA complete cds	1.685	1.3e-05	CSTB		CSTB	1.685	cystatin B	Cytoplasm	peptidase
	TC155624	BT049854	Salmo salar clone ssal-sjb-012-243 Gamma-aminobutyric acid receptor-associated protein-like 2 putative mRNA complete cds	1.679	0.004486	GABARAPL2		GABARAPL2	1.679	GABA type A receptor associated protein like 2	Cytoplasm	other
	TC137987	NM_001140535	Salmo salar lipase hormone-sensitive (lipe) mRNA_x0001_gb-BT046037.1- Salmo salar clone ssal-rgf-539-381 Endothelial lipase precursor putative mRNA complete cds	1.678	1.7e-05	LIPG		LIPG	1.678	lipase G, endothelial type	Extracellular Space	enzyme
	TC160887	BT057617	Salmo salar clone ssal-rgb-543-355 Splicing factor arginine/serine-rich 7 putative mRNA complete cds	1.677	0.0003	SRSF7		SRSF7	1.677	serine and arginine rich splicing factor 7	Nucleus	other
	TC170621	BT072243	Salmo salar clone ssal-rgf-518-093 Proto-oncogene vav putative mRNA pseudogene cds	1.674	1.4e-05	VAV1		VAV1	1.674	vav guanine nucleotide exchange factor 1	Nucleus	transcription regulator
	TC140486	BT049670	Salmo salar clone ssal-evf-542-140 Aldose reductase putative mRNA complete cds	1.671	9.4e-05	AKR1B1		AKR1B1	1.671	aldo-keto reductase family 1 member B	Cytoplasm	enzyme
	TC164216	BT050323	Salmo salar clone ssal-rgb2-608-010 60S ribosomal protein L36a putative mRNA complete cds	1.667	0.012762	RPL36A		RPL36A	1.667	ribosomal protein L36a	Cytoplasm	other
	TC140354	BT072024	Salmo salar clone ssal-rgf-508-024 Sushi von Willebrand factor type A EGF and pentraxin domain-containing protein 1 precursor putative mRNA pseudogene cds	1.661	0.000245	CR1		CR1	1.661	complement C3b/C4b receptor 1 (Knops blood group)	Plasma Membrane	cell surface receptor
	TC143863	NM_001165305	Salmo salar Sodium-coupled neutral amino acid transporter 2 (s38a2) mRNA_x0001_gb-BT058721.1- Salmo salar clone ssal-rgf-001-053 Sodium-coupled neutral amino acid transporter 2 putative mRNA complete cds	1.66	4e-06	SLC38A2		SLC38A2	1.66	solute carrier family 38 member 2	Plasma Membrane	transporter
	TC146919	NM_199538	Danio rerio zgc:73187 (zgc:73187) mRNA_x0001_gb-BC059537.1- Danio rerio zgc:73187 mRNA (cDNA clone MGC:73187 IMAGE:4787496) complete cds	1.656	0.049637	TRAPPC13		TRAPPC13	1.656	trafficking protein particle complex 13	Cytoplasm	other
	IMM 699	NM_001173669	Salmo salar major vault protein (mvp) mRNA_x0001_gb-BT059208.1- Salmo salar clone ssal-rgf-532-194 Major vault protein putative mRNA complete cds	1.655	0.030665	MVP		MVP	1.655	major vault protein	Nucleus	other
	TC142840	XM_002200512	PREDICTED: Taeniopygia guttata egl nine homolog 3 (C. elegans) (LOC100219039) mRNA	1.648	2.2e-05	EGLN3		EGLN3	1.648	egl-9 family hypoxia inducible factor 3	Cytoplasm	enzyme
	TC147786	BC171622	Danio rerio ATPase Ca++ transporting plasma membrane 1a mRNA (cDNA clone MGC:198349 IMAGE:9039338) complete cds	1.633	1.3e-05	ATP2B1		ATP2B1	1.633	ATPase plasma membrane Ca2+ transporting 1	Plasma Membrane	transporter
	TC163895	NM_001124467	Oncorhynchus mykiss C5a receptor (c5ar) mRNA_x0001_gb-AY366353.1- Oncorhynchus mykiss C5a receptor mRNA complete cds	1.633	1e-05	C5A		-	1.633	-	-	-
	TC156144	BT056792	Salmo salar clone ssal-eve-558-331 Eukaryotic translation initiation factor 1b putative mRNA complete cds	1.632	8e-06	EIF1		EIF1	1.632	eukaryotic translation initiation factor 1	Cytoplasm	translation regulator
	TC166473	not-annotated	not-annotated	1.628	7e-06	ITGA6		ITGA6	1.628	integrin subunit alpha 6	Plasma Membrane	cell surface receptor
	TC156307	HM159472	Salmo salar clone BAC 261D01 Foxl2-like protein (Foxl2) gene complete cds	1.626	0.000468	KDELC2		POGLUT3	1.626	protein O-glucosyltransferase 3	Other	other
	TC161715	not-annotated	not-annotated	1.624	0.026534	SNAP91		SNAP91	1.624	synaptosome associated protein 91	Plasma Membrane	other
	TC161387	BT073223	Oncorhynchus mykiss clone omyk-evn-503-292 40S ribosomal protein S17 putative mRNA complete cds	1.622	0.034262	RPS17L		RPS17	1.622	ribosomal protein S17	Cytoplasm	other
	TC155166	CR749178	Zebrafish DNA sequence from clone DKEY-220H13 in linkage group 21 complete sequence	1.621	0.000725	SUPT6H		SUPT6H	1.621	SPT6 homolog, histone chaperone and transcription elongation factor	Nucleus	transcription regulator
	TC171516	BT080000	Esox lucius clone eluc-evq-536-094 Purine nucleoside phosphorylase putative mRNA complete cds	1.619	2.9e-05	PNP		PNP	1.619	purine nucleoside phosphorylase	Nucleus	enzyme
	TC163707	NM_001173835	Salmo salar Sialin (s17a5) mRNA_x0001_gb-BT059615.1- Salmo salar clone ssal-rgf-502-005 Sialin putative mRNA complete cds	1.615	0.016531	SLC17A5		SLC17A5	1.615	solute carrier family 17 member 5	Plasma Membrane	transporter
	TC148233	BT059053	Salmo salar clone ssal-rgf-522-322 AN1-type zinc finger protein 3 putative mRNA complete cds	1.594	0.000843	ZFAND3		ZFAND3	1.594	zinc finger AN1-type containing 3	Other	other
	TC145194	BT045469	Salmo salar clone ssal-rgf-522-143 3-methyl-2-oxobutanoate dehydrogenase kinase mitochondrial precursor putative mRNA complete cds	1.593	8.2e-05	BCKDK		BCKDK	1.593	branched chain keto acid dehydrogenase kinase	Cytoplasm	kinase
	TC139228	CR407595	Zebrafish DNA sequence from clone CH211-220P15 in linkage group 4 Contains the gene for a novel protein similar to H.sapiens CCDC3 coiled-coil domain containing 3 (CCDC3) the gene for a novel protein similar to H.sapiens OPTN optineurin (OPTN zgc:77868) and five novel genes complete sequence	1.591	0.001021	CCDC3		CCDC3	1.591	coiled-coil domain containing 3	Cytoplasm	other
	TC147872	BT057758	Salmo salar clone ssal-evd-501-089 CCAAT/enhancer-binding protein delta putative mRNA complete cds	1.589	1.7e-05	CEBPD		CEBPD	1.589	CCAAT enhancer binding protein delta	Nucleus	transcription regulator
	TC142819	NM_001139683	Salmo salar protein arginine methyltransferase 1 (prmt1) mRNA_x0001_gb-BT043702.1- Salmo salar clone HM5_2390 protein arginine methyltransferase 1 (prmt1) mRNA complete cds	1.575	0.000251	PRMT1		PRMT1	1.575	protein arginine methyltransferase 1	Nucleus	enzyme
	TC155998	BT026860	Gasterosteus aculeatus clone CFW73-G09 mRNA sequence	1.572	0.000137	LMOD3		LMOD3	1.572	leiomodin 3	Cytoplasm	other
	TC161674	CR637562	Tetraodon nigroviridis full-length cDNA	1.568	0.002641	MAFK		MAFK	1.568	MAF bZIP transcription factor K	Nucleus	transcription regulator
	TC138709	AB516401	Plecoglossus altivelis altivelis TRAF6 gene for TNF receptor-associated factor 6 complete cds	1.564	0.000313	TRAF6		TRAF6	1.564	TNF receptor associated factor 6	Cytoplasm	enzyme
	TC161494	NM_001173646	Salmo salar Pyridoxal phosphate phosphatase (plpp) mRNA_x0001_gb-BT059157.1- Salmo salar clone ssal-rgf-528-321 Pyridoxal phosphate phosphatase putative mRNA complete cds	1.563	3.4e-05	PDXP		PDXP	1.563	pyridoxal phosphatase	Plasma Membrane	phosphatase
	TC137484	NM_001146370	Salmo salar DnaJ homolog subfamily C member 5 (dnjc5) mRNA_x0001_gb-BT056418.1- Salmo salar clone ssal-eve-539-204 DnaJ homolog subfamily C member 5 putative mRNA complete cds	1.562	0.028667	DNAJC5B		DNAJC5B	1.562	DnaJ heat shock protein family (Hsp40) member C5 beta	Other	transporter
	TC170111	BC135020	Danio rerio microsomal triglyceride transfer protein mRNA (cDNA clone MGC:162558 IMAGE:7165324) complete cds	1.562	0.00451	MTTP		MTTP	1.562	microsomal triglyceride transfer protein	Cytoplasm	transporter
	TC169661	not-annotated	not-annotated	1.56	7.9e-05	CASP3		CASP3	1.56	caspase 3	Cytoplasm	peptidase
	TC141603	NM_001140154	Salmo salar B-cell CLL/lymphoma 7b (bcl7b) mRNA_x0001_gb-BT045337.1- Salmo salar clone ssal-rgf-518-281 B-cell CLL/lymphoma 7 protein family member B putative mRNA complete cds	1.556	0.000398	BCL7B		BCL7B	1.556	BAF chromatin remodeling complex subunit BCL7B	Nucleus	other
	TC167973	BT072492	Salmo salar clone ssal-rgf-527-224 unknown large open reading frame mRNA novel cds	1.556	0.000159	PIEZO2		PIEZO2	1.556	piezo type mechanosensitive ion channel component 2	Other	ion channel
	TC167794	NM_001173917	Salmo salar C-terminal binding protein 2 (ctbp2) mRNA_x0001_gb-BT059703.1- Salmo salar clone ssal-rgf-517-331 C-terminal-binding protein 2 putative mRNA complete cds	1.551	5.3e-05	CTBP1		CTBP1	1.551	C-terminal binding protein 1	Nucleus	enzyme
	TC163471	NM_001141086	Salmo salar Apoptosis regulator Bcl-X (bclx) mRNA_x0001_gb-BT048202.1- Salmo salar clone ssal-rgb2-633-222 Apoptosis regulator Bcl-X putative mRNA complete cds	1.547	0.033579	BCL2L1		BCL2L1	1.547	BCL2 like 1	Cytoplasm	other
	TC164832	XM_003264156	PREDICTED: Nomascus leucogenys angiopoietin-like 2 (ANGPTL2) mRNA	1.546	0.000291	ANGPTL2		ANGPTL2	1.546	angiopoietin like 2	Extracellular Space	other
	TC149967	BT072552	Salmo salar clone ssal-rgf-530-066 UBX domain-containing protein 8 putative mRNA pseudogene cds	1.538	0.006142	FAF2		FAF2	1.538	Fas associated factor family member 2	Cytoplasm	other
	TC143251	BT045396	Salmo salar clone ssal-rgf-520-076 Abhydrolase domain-containing protein 10 mitochondrial precursor putative mRNA complete cds	1.536	8.2e-05	ABHD10		ABHD10	1.536	abhydrolase domain containing 10, depalmitoylase	Cytoplasm	enzyme
	TC147214	NM_001007452	Danio rerio zgc:101614 (zgc:101614) mRNA_x0001_gb-BC085387.1- Danio rerio zgc:101614 mRNA (cDNA clone MGC:101614 IMAGE:7224720) complete cds	1.536	0.002745	GNB2		GNB2	1.536	G protein subunit beta 2	Plasma Membrane	enzyme
	TC160167	XM_001516382	PREDICTED: Ornithorhynchus anatinus hypothetical protein LOC100086283 (LOC100086283) partial mRNA	1.527	0.001111	LMNA		LMNA	1.527	lamin A/C	Nucleus	other
	TC138838	NM_001146639	Salmo salar Protein-L-isoaspartateD-aspartate O-methyltransferase (pimt) mRNA_x0001_gb-BT057898.1- Salmo salar clone ssal-eve-518-071 Protein-L-isoaspartateD-aspartate O-methyltransferase putative mRNA complete cds	1.527	0.017829	PCMT1		PCMT1	1.527	protein-L-isoaspartate (D-aspartate) O-methyltransferase	Cytoplasm	enzyme
	TC166573	BT072384	Salmo salar clone ssal-rgf-523-177 MCM10 homolog putative mRNA pseudogene cds	1.525	6e-06	MCM10		MCM10	1.525	minichromosome maintenance 10 replication initiation factor	Nucleus	other
	TC164778	NM_200444	Danio rerio Rho GTPase activating protein 4a (arhgap4a) mRNA_x0001_gb-BC054931.1- Danio rerio zgc:63672 mRNA (cDNA clone MGC:63672 IMAGE:5913725) complete cds	1.517	0.000631	SRGAP3		SRGAP3	1.517	SLIT-ROBO Rho GTPase activating protein 3	Cytoplasm	other
	TC154885	XM_001344468	PREDICTED: Danio rerio zinc finger FYVE domain containing 9 (zfyve9) mRNA	1.511	0.000121	ZFYVE9		ZFYVE9	1.511	zinc finger FYVE-type containing 9	Cytoplasm	peptidase
	TC151794	BT059158	Salmo salar clone ssal-rgf-528-352 Tropomyosin alpha-3 chain putative mRNA complete cds	1.509	2.6e-05	TPM3		TPM3	1.509	tropomyosin 3	Cytoplasm	other
	TC157486	NM_001139940	Salmo salar Cytosolic purine 5-nucleotidase (5ntc) mRNA_x0001_gb-BT044922.1- Salmo salar clone ssal-rgf-507-200 Cytosolic purine 5-nucleotidase putative mRNA complete cds	1.505	0.001393	NT5C2		NT5C2	1.505	5'-nucleotidase, cytosolic II	Cytoplasm	phosphatase
	TC140361	NM_001141677	Salmo salar adenosine monophosphate deaminase 1 (isoform M) (ampd1) mRNA_x0001_gb-BT043506.1- Salmo salar clone HM4_0643 adenosine monophosphate deaminase 1 (ampd1) mRNA complete cds	1.498	0.019298	AMPD1		AMPD1	1.498	adenosine monophosphate deaminase 1	Cytoplasm	enzyme
	TC156274	XM_003199023	PREDICTED: Danio rerio protein tyrosine phosphatase receptor type D a (ptprda) mRNA	1.498	0.000316	PTPRF		PTPRF	1.498	protein tyrosine phosphatase receptor type F	Plasma Membrane	phosphatase
	TC156295	BT047909	Salmo salar clone ssal-rgb-553-237 Probable protein COQ10 mitochondrial precursor putative mRNA complete cds	1.494	1.6e-05	COQ10B		COQ10B	1.494	coenzyme Q10B	Cytoplasm	other
	TC136239	BT047374	Salmo salar clone ssal-evd-503-122 Ankyrin repeat domain-containing protein 9 putative mRNA complete cds	1.492	0.005277	ANKRD9		ANKRD9	1.492	ankyrin repeat domain 9	Cytoplasm	other
	TC136929	not-annotated	not-annotated	1.479	1.6e-05	RRP12		RRP12	1.479	ribosomal RNA processing 12 homolog	Nucleus	other
	TC170335	BT047738	Salmo salar clone ssal-sjb-017-109 C1orf93 homolog putative mRNA complete cds	1.476	0.000196	FAM213B		PRXL2B	1.476	peroxiredoxin like 2B	Cytoplasm	enzyme
	TC165585	BT072083	Salmo salar clone ssal-rgf-510-323 unknown large open reading frame mRNA novel cds	1.475	0.004669	C7orf25		C7orf25	1.475	chromosome 7 open reading frame 25	Other	other
	TC154116	GU817337	Salmo salar clone BAC CHORI214-107E05 complete sequence	1.466	0.000187	ARL4C		ARL4C	1.466	ADP ribosylation factor like GTPase 4C	Nucleus	enzyme
	TC143330	NM_001173970	Salmo salar Interleukin-31 receptor A (il31r) mRNA_x0001_gb-BT059257.1- Salmo salar clone ssal-rgf-536-369 Interleukin-31 receptor A precursor putative mRNA complete cds	1.466	0.00044	CSF3R		CSF3R	1.466	colony stimulating factor 3 receptor	Plasma Membrane	cell surface receptor
	TC160243	BT059236	Salmo salar clone ssal-rgf-535-248 14-3-3 protein beta/alpha putative mRNA complete cds	1.466	7e-06	YWHAB		YWHAB	1.466	tyrosine 3-monooxygenase/tryptophan 5-monooxygenase activation protein beta	Cytoplasm	other
	TC172345	BT045651	Salmo salar clone ssal-rgf-527-327 Golgi-associated plant pathogenesis-related protein 1 putative mRNA complete cds	1.465	0.000288	GLIPR2		GLIPR2	1.465	GLI pathogenesis related 2	Cytoplasm	other
	TC165221	NM_001139768	Salmo salar ATP-binding cassette sub-family E (OABP) member 1 (abce1) mRNA_x0001_gb-BT044624.1- Salmo salar clone ssal-rgf-001-081 ATP-binding cassette sub-family E member 1 putative mRNA complete cds	1.459	0.017169	ABCE1		ABCE1	1.459	ATP binding cassette subfamily E member 1	Cytoplasm	transporter
	TC137311	BT072037	Salmo salar clone ssal-rgf-508-227 High affinity cAMP-specific 35-cyclic phosphodiesterase 7A putative mRNA pseudogene cds	1.454	0.001299	PDE7A		PDE7A	1.454	phosphodiesterase 7A	Cytoplasm	enzyme
	TC145147	BT072131	Salmo salar clone ssal-rgf-512-378 CDV3 homolog putative mRNA partial cds	1.453	2.2e-05	CDV3		CDV3	1.453	CDV3 homolog	Cytoplasm	other
	TC172209	BC153555	Danio rerio methyl-CpG binding domain protein 2 mRNA (cDNA clone MGC:174294 IMAGE:8811863) complete cds	1.452	1.5e-05	MBD2		MBD2	1.452	methyl-CpG binding domain protein 2	Nucleus	transcription regulator
	TC157341	XM_002915325	PREDICTED: Ailuropoda melanoleuca tsukushin-like (LOC100476289) mRNA	1.452	0.003752	TSKU		TSKU	1.452	tsukushi, small leucine rich proteoglycan	Extracellular Space	other
	TC137049	NM_001141910	Salmo salar PDZ and LIM domain protein 4 (pdli4) mRNA_x0001_gb-BT044618.1- Salmo salar clone ssal-rgf-001-030 PDZ and LIM domain protein 4 putative mRNA complete cds	1.449	0.006543	PDLIM4		PDLIM4	1.449	PDZ and LIM domain 4	Plasma Membrane	other
	TC139149	not-annotated	not-annotated	1.446	0.006655	AMN1		AMN1	1.446	antagonist of mitotic exit network 1 homolog	Plasma Membrane	other
	TC162056	BT074392	Oncorhynchus mykiss clone omyk-evo-504-302 ATP synthase lipid-binding protein mitochondrial precursor putative mRNA complete cds	1.444	0.000142	ATP5G3		ATP5MC3	1.444	ATP synthase membrane subunit c locus 3	Cytoplasm	transporter
	TC135891	BT057714	Salmo salar clone ssal-eve-544-375 Cyclin-dependent kinase inhibitor 1C putative mRNA complete cds	1.444	0.008096	CDKN1C		CDKN1C	1.444	cyclin dependent kinase inhibitor 1C	Nucleus	other
	TC143926	not-annotated	not-annotated	1.443	0.001918	TNS4		TNS4	1.443	tensin 4	Cytoplasm	other
	TC156221	DQ025732	Oncorhynchus nerka clone One.F10.75.35 genomic sequence	1.442	0.045156	F10		F10	1.442	coagulation factor X	Extracellular Space	peptidase
	TC171614	NM_001123011	Danio rerio zgc:158426 (zgc:158426) mRNA_x0001_gb-BC160606.1- Danio rerio zgc:158426 mRNA (cDNA clone MGC:158426 IMAGE:7069672) complete cds	1.433	4.9e-05	FAM13B		FAM13B	1.433	family with sequence similarity 13 member B	Cytoplasm	other
	TC140524	not-annotated	not-annotated	1.431	0.011096	MFSD6		MFSD6	1.431	major facilitator superfamily domain containing 6	Plasma Membrane	cell surface receptor
	TC159521	XM_688733	PREDICTED: Danio rerio hypothetical protein LOC565454 (LOC565454) mRNA	1.431	0.006489	YRDC		YRDC	1.431	yrdC N6-threonylcarbamoyltransferase domain containing	Other	other
	TC149981	not-annotated	not-annotated	1.429	0.022229	BRF2		BRF2	1.429	BRF2 RNA polymerase III transcription initiation factor subunit	Nucleus	transcription regulator
	TC159611	BT049353	Salmo salar clone ssal-eve-539-381 FUN14 domain-containing protein 1 putative mRNA complete cds	1.429	0.041282	FUNDC1		FUNDC1	1.429	FUN14 domain containing 1	Cytoplasm	other
	TC163764	NM_001114573	Danio rerio zgc:171837 (zgc:171837) mRNA_x0001_gb-BC155565.1- Danio rerio zgc:171837 mRNA (cDNA clone MGC:171837 IMAGE:7072304) complete cds	1.428	0.011999	ZNF341		ZNF341	1.428	zinc finger protein 341	Nucleus	transcription regulator
	TC149738	BT058982	Salmo salar clone ssal-rgf-517-305 N-arachidonyl glycine receptor putative mRNA complete cds	1.427	0.000748	GPR18		GPR18	1.427	G protein-coupled receptor 18	Plasma Membrane	G-protein coupled receptor
	TC142351	XM_001368156	PREDICTED: Monodelphis domestica similar to C-src tyrosine kinase (LOC100021766) mRNA	1.424	7.2e-05	BHLHE22		BHLHE22	1.424	basic helix-loop-helix family member e22	Nucleus	transcription regulator
	TC170788	not-annotated	not-annotated	1.423	0.029927	POLR2A		POLR2A	1.423	RNA polymerase II subunit A	Nucleus	enzyme
	TC145866	not-annotated	not-annotated	1.415	0.0214	SLK		SLK	1.415	STE20 like kinase	Nucleus	kinase
	TC164831	DQ156149	Salmo salar clone BAC S0085O16 partial sequence	1.412	0.049994	FASTKD5		FASTKD5	1.412	FAST kinase domains 5	Cytoplasm	other
	TC161846	XM_002712795	PREDICTED: Oryctolagus cuniculus spermatogenesis associated 13 (LOC100354861) mRNA	1.411	0.002083	SPATA13		SPATA13	1.411	spermatogenesis associated 13	Plasma Membrane	other
	TC132357	NM_001124223	Oncorhynchus mykiss transcription factor Nkx2.1c (nkx2.1c) mRNA_x0001_dbj-AB159043.1- Oncorhynchus mykiss mRNA for transcription factor Nkx2.1c complete cds	1.41	0.037995	NKX2-1		NKX2-1	1.41	NK2 homeobox 1	Nucleus	transcription regulator
	TC166671	not-annotated	not-annotated	1.406	0.00523	C1orf106		INAVA	1.406	innate immunity activator	Other	other
	TC154689	GU817335	Salmo salar clone BAC CHORI214-083H23 complete sequence	1.399	3.4e-05	MOG		MOG	1.399	myelin oligodendrocyte glycoprotein	Extracellular Space	other
	TC142665	NM_001004993	Xenopus (Silurana) tropicalis NIPA-like domain containing 4 (nipal4) mRNA_x0001_gb-BC075570.1- Xenopus tropicalis MGC89537 protein mRNA (cDNA clone MGC:89537 IMAGE:6993217) complete cds	1.397	0.004837	NIPAL1		NIPAL1	1.397	NIPA like domain containing 1	Cytoplasm	other
	TC139737	BT046698	Salmo salar clone ssal-evd-512-170 Cytochrome b-c1 complex subunit 6 mitochondrial precursor putative mRNA complete cds	1.397	0.038254	UQCRH		UQCRH	1.397	ubiquinol-cytochrome c reductase hinge protein	Cytoplasm	enzyme
	TC152900	DQ143971	Dissostichus mawsoni gamma S1 crystallin mRNA complete cds	1.395	0.000816	CRYGB		CRYGB	1.395	crystallin gamma B	Nucleus	other
	TC167248	BT059432	Salmo salar clone ssal-rgf-510-308 Adrenodoxin mitochondrial precursor putative mRNA complete cds	1.389	0.001508	FDX1		FDX1	1.389	ferredoxin 1	Cytoplasm	transporter
	TC152333	NM_001141632	Salmo salar GTPase HRas (rash) mRNA_x0001_gb-BT044835.1- Salmo salar clone ssal-rgf-505-083 GTPase HRas precursor putative mRNA complete cds	1.387	7.5e-05	HRAS		HRAS	1.387	HRas proto-oncogene, GTPase	Plasma Membrane	enzyme
	TC170902	not-annotated	not-annotated	1.386	0.001988	P2RX5		P2RX5	1.386	purinergic receptor P2X 5	Plasma Membrane	ion channel
	TC141606	tpg-BK001518.1-	TPA_inf: Takifugu rubripes FAM20C2 mRNA complete cds	1.384	0.001529	FAM20C		FAM20C	1.384	FAM20C golgi associated secretory pathway kinase	Extracellular Space	enzyme
	TC162145	XM_001333471	PREDICTED: Danio rerio growth arrest-specific protein 7-like (LOC793701) mRNA	1.382	0.000853	GAS7		GAS7	1.382	growth arrest specific 7	Cytoplasm	transcription regulator
	TC150902	BT060343	Salmo salar clone ssal-rgh-515-243 Inositol polyphosphate 1-phosphatase putative mRNA complete cds	1.38	1.2e-05	INPP1		INPP1	1.38	inositol polyphosphate-1-phosphatase	Cytoplasm	phosphatase
	TC168942	BC154242	Danio rerio cDNA clone IMAGE:5411374	1.379	6.7e-05	LPHN2		ADGRL2	1.379	adhesion G protein-coupled receptor L2	Plasma Membrane	G-protein coupled receptor
	TC139645	BT047230	Salmo salar clone ssal-sjb-017-163 Regulator of G-protein signaling 1 putative mRNA complete cds	1.377	0.002012	RGS21		RGS21	1.377	regulator of G protein signaling 21	Plasma Membrane	enzyme
	TC147462	XM_002188964	PREDICTED: Taeniopygia guttata intersectin 1 (SH3 domain protein) (LOC100227503) mRNA	1.375	0.030664	ITSN1		ITSN1	1.375	intersectin 1	Cytoplasm	other
	TC146139	CU459065	Zebrafish DNA sequence from clone CH211-149K23 in linkage group 16 complete sequence	1.374	0.002457	CDC42EP5		CDC42EP5	1.374	CDC42 effector protein 5	Cytoplasm	other
	TC151027	not-annotated	not-annotated	1.372	0.029916	C6orf136		C6orf136	1.372	chromosome 6 open reading frame 136	Cytoplasm	other
	TC145080	BT059368	Salmo salar clone ssal-rgf-510-150 Elongation factor 1-alpha oocyte form putative mRNA complete cds	1.371	1.5e-05	EEF1A1		EEF1A1	1.371	eukaryotic translation elongation factor 1 alpha 1	Cytoplasm	translation regulator
	TC150196	not-annotated	not-annotated	1.371	0.000193	FIBIN		FIBIN	1.371	fin bud initiation factor homolog	Cytoplasm	other
	TC149912	BT028764	Gasterosteus aculeatus clone CNB300-F03 mRNA sequence	1.37	3.3e-05	SEC23B		SEC23B	1.37	SEC23 homolog B, COPII coat complex component	Extracellular Space	transporter
	TC136765	NM_001124686	Oncorhynchus mykiss cystathionine-beta-synthase (cbs) mRNA_x0001_gb-EU315112.1- Oncorhynchus mykiss cystathionine-beta-synthase mRNA complete cds	1.369	0.012535	CBS		CBS/CBSL	1.369	cystathionine beta-synthase	Cytoplasm	enzyme
	TC162797	XR_026691	PREDICTED: Gallus gallus hypothetical protein LOC769661 (LOC769661) partial mRNA	1.368	0.035638	ATF7		ATF7	1.368	activating transcription factor 7	Nucleus	transcription regulator
	TC161799	XM_001084225	PREDICTED: Macaca mulatta dipeptidyl peptidase 9-like (LOC695587) partial mRNA	1.365	0.000727	DPP9		DPP9	1.365	dipeptidyl peptidase 9	Cytoplasm	peptidase
	TC163626	AY736067	Salmo salar delta-6 fatty acyl desaturase D6fad_a gene complete cds	1.363	2.3e-05	FADS2		FADS2	1.363	fatty acid desaturase 2	Plasma Membrane	enzyme
	TC148852	BT071855	Salmo salar clone ssal-rgf-002-197 DNA mismatch repair protein Mlh3 putative mRNA pseudogene cds	1.358	0.007793	MLH3		MLH3	1.358	mutL homolog 3	Nucleus	other
	TC166185	GU130436	Gasterosteus aculeatus clone BAC CHORI215-217N05 genomic sequence	1.347	4.3e-05	LARP1		LARP1	1.347	La ribonucleoprotein 1, translational regulator	Cytoplasm	translation regulator
	TC170186	CR861160	Pongo abelii mRNA; cDNA DKFZp459P1416 (from clone DKFZp459P1416)	1.344	0.030164	MLF1		MLF1	1.344	myeloid leukemia factor 1	Nucleus	other
	CUST_5_PI425348775	M17	0	1.339	0.000599	CFT1		-	1.339	-	-	-
	TC167176	NM_001173929	Salmo salar Stress 70 protein chaperone microsome-associated 60 kDa protein (stch) mRNA_x0001_gb-BT059111.1- Salmo salar clone ssal-rgf-526-051 Stress 70 protein chaperone microsome-associated 60 kDa protein precursor putative mRNA complete cds	1.337	0.011271	HSPA13		HSPA13	1.337	heat shock protein family A (Hsp70) member 13	Cytoplasm	other
	TC151610	BX537275	Zebrafish DNA sequence from clone DKEYP-120E12 in linkage group 11 complete sequence	1.334	0.034836	MAGI1		MAGI1	1.334	membrane associated guanylate kinase, WW and PDZ domain containing 1	Plasma Membrane	kinase
	TC149540	NM_001165041	Oncorhynchus mykiss programmed cell death 6 (LOC100305136) mRNA_x0001_gb-FJ591154.1- Oncorhynchus mykiss programmed cell death 6 mRNA complete cds	1.334	4.5e-05	PDCD6		PDCD6	1.334	programmed cell death 6	Cytoplasm	other
	TC156463	BT072545	Salmo salar clone ssal-rgf-529-339 Mixed lineage kinase domain-like protein putative mRNA pseudogene cds	1.33	0.001781	MLKL		MLKL	1.33	mixed lineage kinase domain like pseudokinase	Cytoplasm	kinase
	TC151250	not-annotated	not-annotated	1.33	0.021277	R3HDM2		R3HDM2	1.33	R3H domain containing 2	Nucleus	other
	TC162519	NM_001165381	Salmo salar v-crk sarcoma virus CT10 oncogene homolog (avian) (crk) mRNA_x0001_gb-BT058899.1- Salmo salar clone ssal-rgf-512-138 SH2/SH3 adaptor crk putative mRNA complete cds	1.329	0.000193	CRK		CRK	1.329	CRK proto-oncogene, adaptor protein	Cytoplasm	other
	TC151950	BT072048	Salmo salar clone ssal-rgf-509-019 unknown large open reading frame mRNA novel cds	1.326	0.012726	GOLGA6L2		GOLGA6L2	1.326	golgin A6 family like 2	Extracellular Space	other
	TC136556	NM_200108	Danio rerio zinc finger protein 395 (znf395) mRNA_x0001_gb-BC045305.1- Danio rerio zinc finger protein 395 mRNA (cDNA clone MGC:55309 IMAGE:2600536) complete cds	1.317	0.006397	FAM49A		CYRIA	1.317	CYFIP related Rac1 interactor A	Other	other
	TC142582	BT047838	Salmo salar clone ssal-plnb-025-105 NHP2-like protein 1 putative mRNA complete cds	1.314	7.1e-05	NHP2L1		SNU13	1.314	small nuclear ribonucleoprotein 13	Nucleus	other
	TC152867	NM_001139960	Salmo salar Junction plakoglobin (plak) mRNA_x0001_gb-BT044961.1- Salmo salar clone ssal-rgf-508-219 Junction plakoglobin putative mRNA complete cds	1.313	2.3e-05	JUP		JUP	1.313	junction plakoglobin	Plasma Membrane	other
	TC171298	NM_001139979	Salmo salar kelch-like 6 (Drosophila) (klhl6) mRNA_x0001_gb-BT044996.1- Salmo salar clone ssal-rgf-509-166 Kelch-like protein 6 putative mRNA complete cds	1.308	0.001524	KLHL6		KLHL6	1.308	kelch like family member 6	Other	other
	TC146916	BT072299	Salmo salar clone ssal-rgf-520-156 Ubiquitin carboxyl-terminal hydrolase 2 putative mRNA pseudogene cds	1.308	0.004541	USP2		USP2	1.308	ubiquitin specific peptidase 2	Cytoplasm	peptidase
	TC133329	XM_684379	PREDICTED: Danio rerio ethanolamine kinase 1 transcript variant 1 (etnk1) mRNA	1.306	0.000811	ETNK1		ETNK1	1.306	ethanolamine kinase 1	Cytoplasm	kinase
	TC147307	not-annotated	not-annotated	1.299	0.017076	ZNF471		ZNF471	1.299	zinc finger protein 471	Nucleus	transcription regulator
	TC148362	XM_703863	PREDICTED: Danio rerio phosphodiesterase 4B cAMP-specific transcript variant 2 (pde4b) mRNA	1.298	0.0001	PDE4B		PDE4B	1.298	phosphodiesterase 4B	Cytoplasm	enzyme
	TC152917	DQ839236	Salmo salar diacylglycerol O-acyltransferase-like protein 1 (DGAT1) mRNA partial cds	1.296	0.002932	DGAT1		DGAT1	1.296	diacylglycerol O-acyltransferase 1	Cytoplasm	enzyme
	TC139273	NM_001141653	Salmo salar FAM135A (f135a) mRNA_x0001_gb-BT046351.1- Salmo salar clone ssal-evd-551-309 FAM135A putative mRNA complete cds	1.296	0.032713	FAM135A		FAM135A	1.296	family with sequence similarity 135 member A	Other	enzyme
	TC140865	NM_001093303	Xenopus laevis Tax1 (human T-cell leukemia virus type I) binding protein 3 (tax1bp3) mRNA_x0001_gb-BC077422.1- Xenopus laevis Tax1 (human T-cell leukemia virus type I) binding protein 3 mRNA (cDNA clone MGC:82188 IMAGE:3400425) complete cds	1.292	7e-05	TAX1BP3		TAX1BP3	1.292	Tax1 binding protein 3	Cytoplasm	transcription regulator
	TC168714	CR670276	Tetraodon nigroviridis full-length cDNA	1.29	0.003392	PPAN		PPAN	1.29	peter pan homolog	Nucleus	other
	TC158841	not-annotated	not-annotated	1.289	0.00012	PIK3R5		PIK3R5	1.289	phosphoinositide-3-kinase regulatory subunit 5	Cytoplasm	kinase
	TC157117	NM_001044852	Danio rerio exportin tRNA (nuclear export receptor for tRNAs) (xpot) mRNA	1.287	0.000405	XPOT		XPOT	1.287	exportin for tRNA	Nucleus	other
	TC142342	AC203456	Salmo salar BAC CH214-397C7 (Children's Hospital Oakland Research Institute Atlantic Salmon BAC Library) complete sequence	1.286	0.012132	CDC42SE2		CDC42SE2	1.286	CDC42 small effector 2	Plasma Membrane	other
	TC135344	NM_001173758	Salmo salar Glycerol kinase testis specific 1 (glpk3) mRNA_x0001_gb-BT059430.1- Salmo salar clone ssal-rgf-535-285 Glycerol kinase testis specific 1 putative mRNA complete cds	1.286	0.010799	GK		GK	1.286	glycerol kinase	Cytoplasm	kinase
	TC134850	BT044977	Salmo salar clone ssal-rgf-508-334 Leukocyte elastase inhibitor putative mRNA complete cds	1.286	2.3e-05	SERPINB6		SERPINB6	1.286	serpin family B member 6	Cytoplasm	other
	TC140593	BT125285	Salmo salar clone ssal-eve-510-259 Glycogenin-1 putative mRNA complete cds	1.285	0.005502	GYG1		GYG1	1.285	glycogenin 1	Cytoplasm	enzyme
	TC141729	NM_199900	Danio rerio HEAT repeat containing 1 (heatr1) mRNA_x0001_gb-BC055128.1- Danio rerio HEAT repeat containing 1 mRNA (cDNA clone MGC:63510 IMAGE:2642926) complete cds	1.273	3.4e-05	HEATR1		HEATR1	1.273	HEAT repeat containing 1	Nucleus	other
	TC151942	NM_001140379	Salmo salar noggin 2 (nog2) mRNA_x0001_gb-BT045755.1- Salmo salar clone ssal-rgf-530-197 Nucleolar GTP-binding protein 2 putative mRNA complete cds	1.27	0.005096	GNL2		GNL2	1.27	G protein nucleolar 2	Nucleus	enzyme
	TC132460	AY973028	Oncorhynchus mykiss CD4 mRNA complete cds	1.27	0.00342	HMCN1		HMCN1	1.27	hemicentin 1	Extracellular Space	other
	TC158153	BT072650	Salmo salar clone ssal-rgf-534-337 SWI/SNF-related matrix-associated actin-dependent regulator of chromatin subfamily B member 1 putative mRNA pseudogene cds	1.268	0.018981	SMARCB1		SMARCB1	1.268	SWI/SNF related, matrix associated, actin dependent regulator of chromatin, subfamily b, member 1	Nucleus	transcription regulator
	TC164569	NM_001165162	Oncorhynchus mykiss potassium channel tetramerisation domain containing 5 (kctd5) mRNA_x0001_gb-BT074147.1- Oncorhynchus mykiss clone omyk-evo-504-040 BTB/POZ domain-containing protein KCTD5 putative mRNA complete cds	1.266	0.003211	KCTD5		KCTD5	1.266	potassium channel tetramerization domain containing 5	Cytoplasm	other
	TC137930	BT048446	Salmo salar clone ssal-evd-529-350 Annexin A2-A putative mRNA complete cds	1.264	0.001356	ANXA2		ANXA2	1.264	annexin A2	Plasma Membrane	other
	TC134436	BT072481	Salmo salar clone ssal-rgf-527-095 U3 small nucleolar RNA-interacting protein 2 putative mRNA pseudogene cds	1.264	0.006504	RRP9		RRP9	1.264	ribosomal RNA processing 9, U3 small nucleolar RNA binding protein	Nucleus	other
	TC136129	GU126381	Sebastes schlegelii peptidoglycan recognition protein L1 (PGRP-L1) mRNA complete cds	1.263	0.000142	PGLYRP2		PGLYRP2	1.263	peptidoglycan recognition protein 2	Plasma Membrane	cell surface receptor
	IMM 407	DQ455749	Ctenopharyngodon idella TNF receptor associated factor 1 (TRAF1) mRNA complete cds	1.263	0.009828	TRAF1		TRAF1	1.263	TNF receptor associated factor 1	Cytoplasm	other
	TC141566	BC165046	Danio rerio zgc:56112 mRNA (cDNA clone MGC:192221 IMAGE:100060530) complete cds	1.262	3e-05	CHMP4B		CHMP4B	1.262	charged multivesicular body protein 4B	Cytoplasm	other
	TC147556	NM_198814	Danio rerio zinc-fingers and homeoboxes 2 (zhx2) mRNA_x0001_gb-BC141782.1- Danio rerio zinc-fingers and homeoboxes 2 mRNA (cDNA clone MGC:162110 IMAGE:8732297) complete cds	1.262	0.023787	ZHX2		ZHX2	1.262	zinc fingers and homeoboxes 2	Nucleus	transcription regulator
	TC160669	BT073843	Oncorhynchus mykiss clone omyk-evo-506-360 60S ribosomal protein L23 putative mRNA complete cds	1.261	0.000971	RPL23		RPL23	1.261	ribosomal protein L23	Cytoplasm	other
	TC157146	GU480583	Oncorhynchus mykiss multidrug resistance protein 4 (Abcc4) mRNA partial cds	1.258	0.000386	ABCC4		ABCC4	1.258	ATP binding cassette subfamily C member 4	Plasma Membrane	transporter
	TC156800	NM_001139796	Salmo salar pim-1 oncogene (pim1) mRNA_x0001_gb-BT044672.1- Salmo salar clone ssal-rgf-002-229 Serine/threonine-protein kinase Pim-1 putative mRNA complete cds	1.258	0.006899	PIM3		PIM3	1.258	Pim-3 proto-oncogene, serine/threonine kinase	Cytoplasm	kinase
	TC153409	BT048694	Salmo salar clone ssal-eve-522-219 Digestive organ expansion factor putative mRNA complete cds	1.257	0.000159	DIEXF		UTP25	1.257	UTP25 small subunit processor component	Nucleus	other
	TC151353	NM_001140347	Salmo salar RuvB-like 1 (ruvb1) mRNA_x0001_gb-BT045691.1- Salmo salar clone ssal-rgf-528-355 RuvB-like 1 putative mRNA complete cds	1.256	0.000235	RUVBL1		RUVBL1	1.256	RuvB like AAA ATPase 1	Nucleus	transcription regulator
	TC136579	CR719807	Tetraodon nigroviridis full-length cDNA	1.256	0.001301	SCAMP2		SCAMP2	1.256	secretory carrier membrane protein 2	Cytoplasm	other
	TC138651	XM_692016	PREDICTED: Danio rerio ATPase Ca++ transporting ubiquitous (atp2a3) mRNA	1.253	0.000805	ATP2A1		ATP2A1	1.253	ATPase sarcoplasmic/endoplasmic reticulum Ca2+ transporting 1	Cytoplasm	transporter
	TC165847	not-annotated	not-annotated	1.252	0.000817	PRB3		PRB3	1.252	proline rich protein BstNI subfamily 3	Other	other
	TC140994	XM_512468	PREDICTED: Pan troglodytes calcium homeostasis endoplasmic reticulum protein transcript variant 3 (CHERP) mRNA	1.247	0.048005	CHERP		CHERP	1.247	calcium homeostasis endoplasmic reticulum protein	Cytoplasm	other
	IMM 1004	AY523839	Oncorhynchus mykiss dicer mRNA partial cds	1.247	0.027443	DICER1		DICER1	1.247	dicer 1, ribonuclease III	Cytoplasm	enzyme
	TC165142	NM_001173919	Salmo salar 3-hydroxy-3-methylglutaryl-coenzyme A reductase (hmdh) mRNA_x0001_gb-BT058953.1- Salmo salar clone ssal-rgf-515-333 3-hydroxy-3-methylglutaryl-coenzyme A reductase putative mRNA complete cds	1.246	0.003595	HMGCR		HMGCR	1.246	3-hydroxy-3-methylglutaryl-CoA reductase	Cytoplasm	enzyme
	TC151285	XM_001342885	PREDICTED: Danio rerio amyloid beta (A4) precursor-like protein (aplp) mRNA	1.244	0.000306	APLP1		APLP1	1.244	amyloid beta precursor like protein 1	Extracellular Space	other
	TC136593	BT048099	Salmo salar clone ssal-evd-530-096 Transforming protein RhoA precursor putative mRNA complete cds	1.243	0.028605	RHOA		RHOA	1.243	ras homolog family member A	Cytoplasm	enzyme
	TC158588	BT078808	Esox lucius clone eluc-evq-516-039 Epithelial membrane protein 2 putative mRNA complete cds	1.24	0.000361	EMP2		EMP2	1.24	epithelial membrane protein 2	Plasma Membrane	other
	TC143066	NM_001160672	Oncorhynchus mykiss Ribosomal protein L7-like 1 (rl7l) mRNA_x0001_gb-BT073606.1- Oncorhynchus mykiss clone omyk-evn-512-365 Ribosomal protein L7-like 1 putative mRNA complete cds	1.24	2.2e-05	RPL7L1		RPL7L1	1.24	ribosomal protein L7 like 1	Cytoplasm	transcription regulator
	TC155847	BT049490	Salmo salar clone ssal-evf-518-285 IMM ediate early response gene 5 protein putative mRNA complete cds	1.238	2.9e-05	IER5		IER5	1.238	immediate early response 5	Nucleus	other
	TC133398	NM_001140486	Salmo salar ADRM1 protein (adrm1) mRNA_x0001_gb-BT045950.1- Salmo salar clone ssal-rgf-537-185 ADRM1 putative mRNA complete cds	1.233	0.03668	ADRM1		ADRM1	1.233	adhesion regulating molecule 1	Plasma Membrane	other
	TC155993	NM_001141351	Salmo salar Programmed cell death 1 ligand 1 (pdl1) mRNA_x0001_gb-BT049246.1- Salmo salar clone ssal-sjb-011-129 Programmed cell death 1 ligand 1 precursor putative mRNA complete cds	1.231	9.4e-05	CD274		CD274	1.231	CD274 molecule	Plasma Membrane	enzyme
	TC135890	NM_001140224	Salmo salar Sodium-dependent phosphate transporter 1-A (s20aa) mRNA_x0001_gb-BT045453.1- Salmo salar clone ssal-rgf-521-372 Sodium-dependent phosphate transporter 1-A putative mRNA complete cds	1.221	0.001502	SLC20A1		SLC20A1	1.221	solute carrier family 20 member 1	Plasma Membrane	transporter
	TC140610	BT073663	Oncorhynchus mykiss clone omyk-evn-504-260 Ubiquitin-conjugating enzyme E2 B putative mRNA complete cds	1.221	7.5e-05	UBE2B		UBE2B	1.221	ubiquitin conjugating enzyme E2 B	Cytoplasm	enzyme
	TC139220	JF772872	Paralichthys olivaceus FoxD3 gene complete cds	1.219	0.032353	FOXD3		FOXD3	1.219	forkhead box D3	Nucleus	transcription regulator
	TC141653	DQ025606	Oncorhynchus tshawytscha clone Ots.DRB1.15.60 genomic sequence	1.218	2.9e-05	RBM45		RBM45	1.218	RNA binding motif protein 45	Cytoplasm	other
	TC147300	BT074231	Oncorhynchus mykiss clone omyk-evo-514-002 Apoptosis-associated speck-like protein containing a CARD putative mRNA complete cds	1.211	0.001254	PYCARD		PYCARD	1.211	PYD and CARD domain containing	Cytoplasm	transcription regulator
	TC161475	NM_001139814	Salmo salar archease (arch) mRNA_x0001_gb-BT044713.1- Salmo salar clone ssal-rgf-501-249 archease putative mRNA complete cds	1.211	0.00171	ZBTB8OS		ZBTB8OS	1.211	zinc finger and BTB domain containing 8 opposite strand	Cytoplasm	other
	TC156166	CR640056	Tetraodon nigroviridis full-length cDNA	1.207	7e-05	RASL11B		RASL11B	1.207	RAS like family 11 member B	Plasma Membrane	enzyme
	TC154710	XM_002698992	PREDICTED: Bos taurus chromosome 11 open reading frame 75 ortholog transcript variant 4 (C29H11orf75) mRNA	1.205	0.035854	SMCO4		SMCO4	1.205	single-pass membrane protein with coiled-coil domains 4	Other	other
	TC135580	NM_001141776	Salmo salar Geranylgeranyl pyrophosphate synthetase (ggpps) mRNA_x0001_gb-BT045593.1- Salmo salar clone ssal-rgf-525-353 Geranylgeranyl pyrophosphate synthetase putative mRNA complete cds	1.204	8.6e-05	GGPS1		GGPS1	1.204	geranylgeranyl diphosphate synthase 1	Cytoplasm	enzyme
	TC152405	not-annotated	not-annotated	1.204	0.003471	HRNR		HRNR	1.204	hornerin	Cytoplasm	other
	TC170795	BT050162	Salmo salar clone ssal-eve-006-139 60S ribosomal protein L8 putative mRNA complete cds	1.203	0.009312	RPL8		RPL8	1.203	ribosomal protein L8	Cytoplasm	other
	TC155313	NM_001025182	Danio rerio syntaxin binding protein 1a (stxbp1a) mRNA_x0001_gb-BC097221.1- Danio rerio syntaxin binding protein 1 mRNA (cDNA clone MGC:114171 IMAGE:7430225) complete cds	1.203	0.011684	STXBP1		STXBP1	1.203	syntaxin binding protein 1	Cytoplasm	transporter
	TC166645	NM_001020674	Danio rerio zgc:112282 (zgc:112282) mRNA_x0001_gb-BC095728.1- Danio rerio zgc:112282 mRNA (cDNA clone MGC:112282 IMAGE:7249858) complete cds	1.2	0.016673	GDA		GDA	1.2	guanine deaminase	Cytoplasm	enzyme
	TC132883	NM_001140934	Salmo salar Glucosamine 6-phosphate N-acetyltransferase (gna1) mRNA_x0001_gb-BT047596.1- Salmo salar clone ssal-evf-579-356 Glucosamine 6-phosphate N-acetyltransferase putative mRNA complete cds	1.2	5e-05	GNPNAT1		GNPNAT1	1.2	glucosamine-phosphate N-acetyltransferase 1	Cytoplasm	enzyme
	TC158898	BT027394	Gasterosteus aculeatus clone CFW265-F08 mRNA sequence	1.2	0.024688	SGK3		C8orf44-SGK3/SGK3	1.2	serum/glucocorticoid regulated kinase family member 3	Cytoplasm	kinase
	TC163309	BT072154	Salmo salar clone ssal-rgf-514-049 Eukaryotic translation initiation factor 4E putative mRNA partial cds	1.198	0.000138	EIF4E		EIF4E	1.198	eukaryotic translation initiation factor 4E	Cytoplasm	translation regulator
	TC145238	NM_001124528	Oncorhynchus mykiss zinc exporter 1 (znt1) mRNA_x0001_gb-AY742790.1- Oncorhynchus mykiss zinc exporter 1 (ZnT1) mRNA complete cds	1.196	0.000453	SLC30A1		SLC30A1	1.196	solute carrier family 30 member 1	Plasma Membrane	transporter
	TC162200	BT071857	Salmo salar clone ssal-rgf-002-249 Transmembrane emp24 domain-containing protein 10 precursor putative mRNA partial cds	1.196	0.002185	TMED10		TMED10	1.196	transmembrane p24 trafficking protein 10	Cytoplasm	transporter
	TC161873	CU457815	Zebrafish DNA sequence from clone CH211-12K12 in linkage group 25 complete sequence	1.196	0.004716	WASL		WASL	1.196	WASP like actin nucleation promoting factor	Cytoplasm	other
	TC144117	not-annotated	not-annotated	1.195	0.000176	GNL3		GNL3	1.195	G protein nucleolar 3	Nucleus	other
	TC148662	NM_001160487	Oncorhynchus mykiss follistatin-like 3 glycoprotein (LOC100301654) mRNA_x0001_gb-EU285577.1- Oncorhynchus mykiss follistatin-like 3 glycoprotein mRNA complete cds	1.194	0.001916	FSTL3		FSTL3	1.194	follistatin like 3	Extracellular Space	other
	TC165823	BT045150	Salmo salar clone ssal-rgf-513-190 Bifunctional methylenetetrahydrofolate dehydrogenase/cyclohydrolase mitochondrial precursor putative mRNA complete cds	1.194	0.002015	MTHFD2		MTHFD2	1.194	methylenetetrahydrofolate dehydrogenase (NADP+ dependent) 2, methenyltetrahydrofolate cyclohydrolase	Cytoplasm	enzyme
	TC167902	NM_001195171	Oncorhynchus mykiss suppressor of cytokine signaling 5 (socs5) mRNA_x0001_emb-AM903341.1- Oncorhynchus mykiss mRNA for suppressor of cytokine signaling 5 (socs5 gene)	1.192	0.000329	SOCS4		SOCS4	1.192	suppressor of cytokine signaling 4	Cytoplasm	other
	TC157322	NM_001173912	Salmo salar PR domain containing 9 (prdm9) mRNA_x0001_gb-BT059087.1- Salmo salar clone ssal-rgf-524-177 PR domain zinc finger protein 9 putative mRNA complete cds	1.192	0.000357	ZNF214		ZNF214	1.192	zinc finger protein 214	Nucleus	transcription regulator
	TC149259	NM_001140081	Salmo salar Claudin-12 (cld12) mRNA_x0001_gb-BT045203.1- Salmo salar clone ssal-rgf-514-296 Claudin-12 putative mRNA complete cds	1.19	0.000933	YLPM1		YLPM1	1.19	YLP motif containing 1	Nucleus	transcription regulator
	TC147085	CR700959	Tetraodon nigroviridis full-length cDNA	1.187	0.005023	DNAJB9		DNAJB9	1.187	DnaJ heat shock protein family (Hsp40) member B9	Nucleus	other
	TC145659	BT058762	Salmo salar clone ssal-rgf-501-241 P2Y purinoceptor 8 putative mRNA complete cds	1.187	0.000228	P2RY8		P2RY8	1.187	P2Y receptor family member 8	Plasma Membrane	G-protein coupled receptor
	TC148842	NM_001146437	Salmo salar cornichon homolog (Drosophila) (cnih) mRNA_x0001_gb-BT056744.1- Salmo salar clone ssal-eve-502-265 cornichon homolog putative mRNA complete cds	1.186	0.024934	CNIH		CNIH1	1.186	cornichon family AMPA receptor auxiliary protein 1	Plasma Membrane	other
	TC148250	NM_001140365	Salmo salar Ribose-phosphate pyrophosphokinase 1 (prps1) mRNA_x0001_gb-BT045733.1- Salmo salar clone ssal-rgf-530-009 Ribose-phosphate pyrophosphokinase 1 putative mRNA complete cds	1.186	7.6e-05	PRPS1		PRPS1	1.186	phosphoribosyl pyrophosphate synthetase 1	Cytoplasm	kinase
	TC158383	NM_001160608	Oncorhynchus mykiss RNA-binding protein 4B (rbm4b) mRNA_x0001_gb-BT073375.1- Oncorhynchus mykiss clone omyk-evn-502-103 RNA-binding protein 4B putative mRNA complete cds	1.184	0.000273	RBM4		RBM4	1.184	RNA binding motif protein 4	Nucleus	other
	TC153382	NM_001200341	Ictalurus punctatus wnt1-inducible-signaling pathway protein 1 (wisp1) mRNA_x0001_gb-GU588470.1- Ictalurus punctatus clone CBPN25065 wnt1-inducible-signaling pathway protein 1 (WISP1) mRNA complete cds	1.184	0.017066	WISP1		CCN4	1.184	cellular communication network factor 4	Extracellular Space	other
	TC146479	AF502957	Oncorhynchus kisutch adipose glucose transporter mRNA complete cds	1.182	0.009351	SLC2A4		SLC2A4	1.182	solute carrier family 2 member 4	Plasma Membrane	transporter
	TC134992	NM_001141485	Salmo salar cysteine and glycine-rich protein 3 (cardiac LIM protein) (csrp3) mRNA_x0001_gb-BT049834.1- Salmo salar clone ssal-evd-530-178 Cysteine and glycine-rich protein 3 putative mRNA complete cds	1.181	0.025588	CSRP3		CSRP3	1.181	cysteine and glycine rich protein 3	Nucleus	other
	TC136201	CR711487	Tetraodon nigroviridis full-length cDNA	1.181	0.000305	PPP6R3		PPP6R3	1.181	protein phosphatase 6 regulatory subunit 3	Cytoplasm	other
	TC158324	GU817337	Salmo salar clone BAC CHORI214-107E05 complete sequence	1.179	0.001353	SH3BP4		SH3BP4	1.179	SH3 domain binding protein 4	Cytoplasm	other
	TC159868	XM_003264103	PREDICTED: Nomascus leucogenys RING finger and CCCH-type zinc finger domain-containing protein 2-like (LOC100589492) mRNA	1.175	0.000637	RC3H2		RC3H2	1.175	ring finger and CCCH-type domains 2	Plasma Membrane	enzyme
	TC148585	NM_001140167	Salmo salar Interferon-stimulated 20 kDa exonuclease-like 1 (i20l1) mRNA_x0001_gb-BT045359.1- Salmo salar clone ssal-rgf-519-081 Interferon-stimulated 20 kDa exonuclease-like 1 putative mRNA complete cds	1.174	0.000767	AEN		AEN	1.174	apoptosis enhancing nuclease	Nucleus	enzyme
	TC171354	NM_001140401	Salmo salar calponin 2 (cnn2) mRNA_x0001_gb-BT045796.1- Salmo salar clone ssal-rgf-531-216 Calponin-2 putative mRNA complete cds	1.172	0.00098	CNN2		CNN2	1.172	calponin 2	Cytoplasm	other
	TC140578	not-annotated	not-annotated	1.172	0.005092	NDUFAF4		NDUFAF4	1.172	NADH:ubiquinone oxidoreductase complex assembly factor 4	Cytoplasm	other
	TC136702	BT074223	Oncorhynchus mykiss clone omyk-evo-510-034 Myc protein putative mRNA complete cds	1.171	0.000271	MYC		MYC	1.171	MYC proto-oncogene, bHLH transcription factor	Nucleus	transcription regulator
	TC168902	NM_001141645	Salmo salar E3 ubiquitin-protein ligase MARCH3 (marh3) mRNA_x0001_gb-BT045640.1- Salmo salar clone ssal-rgf-527-203 E3 ubiquitin-protein ligase MARCH3 putative mRNA complete cds	1.166	0.004461	MARCH3		MARCHF3	1.166	membrane associated ring-CH-type finger 3	Cytoplasm	other
	CUST_32_PI425348775	IL-2Rbeta1	0	1.166	0.005976	IL12RB		IL12RB1	1.166	interleukin 12 receptor subunit beta 1	Plasma Membrane	cell surface receptor
	TC152298	CR381538	Zebrafish DNA sequence from clone CH211-87B12 in linkage group 1 complete sequence	1.165	0.001536	FBXW7		FBXW7	1.165	F-box and WD repeat domain containing 7	Nucleus	enzyme
	TC162967	NM_001173650	Salmo salar RNA methyltransferase NOL1 (nol1) mRNA_x0001_gb-BT059165.1- Salmo salar clone ssal-rgf-529-254 RNA methyltransferase NOL1 putative mRNA complete cds	1.162	0.000187	NOP2		NOP2	1.162	NOP2 nucleolar protein	Nucleus	other
	TC155351	BT060207	Salmo salar clone ssal-rgh-509-031 Claudin-like protein ZF4A22 putative mRNA complete cds	1.161	0.004023	CLDN7		CLDN7	1.161	claudin 7	Plasma Membrane	other
	TC136829	BT071894	Salmo salar clone ssal-rgf-502-256 C-ets-2 putative mRNA pseudogene cds	1.161	0.000737	ETS1		ETS1	1.161	ETS proto-oncogene 1, transcription factor	Nucleus	transcription regulator
	TC150709	BT072349	Salmo salar clone ssal-rgf-522-121 Arylacetamide deacetylase-like 1 putative mRNA pseudogene cds	1.161	0.001889	NCEH1		NCEH1	1.161	neutral cholesterol ester hydrolase 1	Plasma Membrane	enzyme
	TC171469	BT072068	Salmo salar clone ssal-rgf-510-038 Cytochrome P450 7B1 putative mRNA pseudogene cds	1.16	0.000775	CYP7A1		CYP7A1	1.16	cytochrome P450 family 7 subfamily A member 1	Cytoplasm	enzyme
	TC172307	EU221179	Salmo salar clone 261P24 interferon-inducible GTPase_b and interferon-inducible GTPase_a genes complete cds; and TCR-gamma constant region locus	1.158	0.000322	IRGC		IRGC	1.158	immunity related GTPase cinema	Other	other
	TC156365	BT072062	Salmo salar clone ssal-rgf-509-333 transport protein Sec61 subunit alpha isoform B putative mRNA pseudogene cds	1.157	0.001737	SEC61A1		SEC61A1	1.157	SEC61 translocon subunit alpha 1	Cytoplasm	transporter
	TC155558	BT027609	Gasterosteus aculeatus clone CGX60-B06 mRNA sequence	1.154	0.000822	MFAP1		MFAP1	1.154	microfibril associated protein 1	Extracellular Space	other
	TC156682	NM_001173689	Salmo salar Long-chain-fatty-acid--CoA ligase 4 (acsl4) mRNA_x0001_gb-BT059249.1- Salmo salar clone ssal-rgf-536-168 Long-chain-fatty-acid--CoA ligase 4 putative mRNA complete cds	1.149	0.000122	ACSL4		ACSL4	1.149	acyl-CoA synthetase long chain family member 4	Cytoplasm	enzyme
	TC140808	BT045807	Salmo salar clone ssal-rgf-531-363 Carbonyl reductase 1 putative mRNA complete cds	1.149	0.000977	CBR1		CBR1	1.149	carbonyl reductase 1	Cytoplasm	enzyme
	TC164353	BC075904	Danio rerio RasGEF domain family member 1Ba mRNA (cDNA clone MGC:92145 IMAGE:7049522) complete cds	1.149	0.000306	RASGEF1B		RASGEF1B	1.149	RasGEF domain family member 1B	Other	other
	TC152173	NM_001008641	Danio rerio RAB25 member RAS oncogene family (rab25) mRNA_x0001_gb-BC086715.1- Danio rerio RAB25 member RAS oncogene family mRNA (cDNA clone MGC:101648 IMAGE:7226117) complete cds	1.145	0.003063	RAB25		RAB25	1.145	RAB25, member RAS oncogene family	Cytoplasm	enzyme
	TC146455	BT058843	Salmo salar clone ssal-rgf-506-344 Deoxyribonuclease gamma precursor putative mRNA complete cds	1.144	0.000532	DNASE1L3		DNASE1L3	1.144	deoxyribonuclease 1 like 3	Nucleus	enzyme
	TC137826	NM_199707	Danio rerio elongation factor RNA polymerase II (ell) mRNA_x0001_gb-BC058072.1- Danio rerio elongation factor RNA polymerase II mRNA (cDNA clone MGC:63836 IMAGE:3817105) complete cds	1.144	0.001368	ELL		ELL	1.144	elongation factor for RNA polymerase II	Nucleus	transcription regulator
	TC153762	NM_001141024	Salmo salar Heat shock protein Hsp-16.1/Hsp-16.11 (hsp11) mRNA	1.141	0.018956	HSPB8		HSPB8	1.141	heat shock protein family B (small) member 8	Cytoplasm	kinase
	TC138682	NM_001173969	Salmo salar TraB domain containing (trabd) mRNA_x0001_gb-BT060390.1- Salmo salar clone ssal-rgh-518-130 TraB domain-containing protein putative mRNA complete cds	1.141	0.012694	TRABD		TRABD	1.141	TraB domain containing	Extracellular Space	other
	TC137810	XM_692023	PREDICTED: Danio rerio similar to PAP-associated domain-containing protein 5 (Topoisomerase-related function protein 4-2) (TRF4-2) (LOC568678) mRNA	1.14	0.013463	PAPD5		TENT4B	1.14	terminal nucleotidyltransferase 4B	Nucleus	enzyme
	TC159028	NM_001124509	Oncorhynchus mykiss cyclin L1 (LOC100136245) mRNA_x0001_gb-AY606031.1- Oncorhynchus mykiss cyclin L1 mRNA complete cds	1.136	0.00018	KRTAP9-1		KRTAP9-1	1.136	keratin associated protein 9-1	Cytoplasm	other
	TC156287	NM_001165080	Oncorhynchus mykiss B-cell translocation gene 3 (btg3) mRNA_x0001_gb-BT073824.1- Oncorhynchus mykiss clone omyk-evo-512-053 BTG3 protein putative mRNA complete cds	1.134	0.000389	BTG3		BTG3	1.134	BTG anti-proliferation factor 3	Nucleus	other
	TC152650	BT045871	Salmo salar clone ssal-rgf-535-096 Integral membrane protein 2C putative mRNA complete cds	1.131	0.012209	ITM2C		ITM2C	1.131	integral membrane protein 2C	Cytoplasm	other
	TC139455	NM_001165401	Salmo salar splicing factor 3a subunit 2 (sf3a2) mRNA_x0001_gb-BT058942.1- Salmo salar clone ssal-rgf-515-075 Splicing factor 3A subunit 2 putative mRNA complete cds	1.131	0.003667	SF3A2		SF3A2	1.131	splicing factor 3a subunit 2	Nucleus	other
	IMM 266	not-annotated	not-annotated	1.128	0.044701	IFI44		IFI44	1.128	interferon induced protein 44	Cytoplasm	other
	TC166992	NM_001140024	Salmo salar Nucleolar protein 5 (nol5) mRNA_x0001_gb-BT045087.1- Salmo salar clone ssal-rgf-511-284 Nucleolar protein 5 putative mRNA complete cds	1.128	0.001112	NOP58		NOP58	1.128	NOP58 ribonucleoprotein	Nucleus	enzyme
	TC168735	BX465206	Zebrafish DNA sequence from clone DKEYP-25A3 in linkage group 19 Contains the gene for a novel protein (zgc:55580) the gene for a novel protein similar to vertebrate sclerostin domain containing 1 (SOSTDC1) the rbb4 gene for retinoblastoma binding protein 4 the gene for a novel protein similar to vertebrate ankyrin repeat and MYND domain containing 2 (ANKMY2) two novel genes and four CpG islands …	1.127	0.001706	SOSTDC1		SOSTDC1	1.127	sclerostin domain containing 1	Extracellular Space	growth factor
	TC134579	XM_001515628	PREDICTED: Ornithorhynchus anatinus similar to RNA polymerase I polypeptide B (LOC100085323) mRNA	1.126	0.015827	POLR1B		POLR1B	1.126	RNA polymerase I subunit B	Nucleus	enzyme
	TC138510	NM_001007402	Danio rerio transducin (beta)-like 3 (tbl3) mRNA_x0001_gb-BC085436.1- Danio rerio zgc:101778 mRNA (cDNA clone MGC:101778 IMAGE:7230517) complete cds	1.123	0.011334	TBL3		TBL3	1.123	transducin beta like 3	Cytoplasm	peptidase
	TC133381	BT073394	Oncorhynchus mykiss clone omyk-evn-506-096 Complement component 1 Q subcomponent-binding protein mitochondrial precursor putative mRNA complete cds	1.122	0.000393	C1QBP		C1QBP	1.122	complement C1q binding protein	Cytoplasm	transcription regulator
	TC136377	BT125398	Salmo salar clone ssal-eve-571-170 Fibroblast growth factor-binding protein 1 precursor putative mRNA complete cds	1.122	0.00053	FGFBP1		FGFBP1	1.122	fibroblast growth factor binding protein 1	Extracellular Space	other
	TC144260	AB370192	Thunnus orientalis LPL mRNA for lipoprotein lipase complete cds	1.122	0.002308	LPL		LPL	1.122	lipoprotein lipase	Cytoplasm	enzyme
	TC155470	NM_001140569	Salmo salar Synuclein (syu) mRNA_x0001_gb-BT046103.1- Salmo salar clone ssal-rgf-541-255 Synuclein putative mRNA complete cds	1.122	0.047841	SNCG		SNCG	1.122	synuclein gamma	Cytoplasm	other
	TC164546	NM_001141397	Salmo salar RRS1 ribosome biogenesis regulator homolog (S. cerevisiae) (rrs1) mRNA_x0001_gb-BT049433.2- Salmo salar clone ssal-eve-579-098 Ribosome biogenesis regulatory protein homolog putative mRNA complete cds	1.116	7.5e-05	RRS1		RRS1	1.116	ribosome biogenesis regulator 1 homolog	Nucleus	other
	TC140441	NM_001141393	Salmo salar Coiled-coil domain-containing protein 127 (cc127) mRNA_x0001_gb-BT049413.1- Salmo salar clone ssal-eve-526-107 Coiled-coil domain-containing protein 127 putative mRNA complete cds	1.112	0.042322	CCDC127		CCDC127	1.112	coiled-coil domain containing 127	Other	other
	TC167013	BT073154	Oncorhynchus mykiss clone omyk-evn-510-114 Cytochrome c oxidase polypeptide VIc precursor putative mRNA complete cds	1.112	0.00192	COX6C		COX6C	1.112	cytochrome c oxidase subunit 6C	Cytoplasm	enzyme
	TC155954	BT044824	Salmo salar clone ssal-rgf-504-318 Heterogeneous nuclear ribonucleoprotein K putative mRNA complete cds	1.111	0.004328	HNRNPK		HNRNPK	1.111	heterogeneous nuclear ribonucleoprotein K	Nucleus	transcription regulator
	TC156038	BT044876	Salmo salar clone ssal-rgf-506-106 Ras-related C3 botulinum toxin substrate 1 precursor putative mRNA complete cds	1.109	0.010638	RAC1		RAC1	1.109	Rac family small GTPase 1	Plasma Membrane	enzyme
	TC156388	BT072492	Salmo salar clone ssal-rgf-527-224 unknown large open reading frame mRNA novel cds	1.108	0.000196	CTU2		CTU2	1.108	cytosolic thiouridylase subunit 2	Cytoplasm	other
	TC136586	XM_002663812	PREDICTED: Danio rerio macrophage stimulating 1 receptor (c-met-related tyrosine kinase) b (mst1rb) mRNA	1.108	0.000783	MET		MET	1.108	MET proto-oncogene, receptor tyrosine kinase	Plasma Membrane	kinase
	TC145726	HM190267	Oncorhynchus mykiss transmembrane protein 120B mRNA partial cds	1.108	9.1e-05	TMEM120B		TMEM120B	1.108	transmembrane protein 120B	Nucleus	other
	TC136674	U49694	Rattus norvegicus brain cytosolic acyl coenzyme A thioester hydrolase mRNA complete cds	1.107	6.4e-05	ACOT7		ACOT7	1.107	acyl-CoA thioesterase 7	Cytoplasm	enzyme
	TC133797	BT079653	Esox lucius clone eluc-evq-505-016 Tubulin-specific chaperone C putative mRNA complete cds	1.107	0.021351	TBCC		TBCC	1.107	tubulin folding cofactor C	Cytoplasm	enzyme
	TC150088	not-annotated	not-annotated	1.106	0.00999	ANKLE2		ANKLE2	1.106	ankyrin repeat and LEM domain containing 2	Nucleus	transcription regulator
	TC133051	NM_001124637	Oncorhynchus mykiss 5'-AMP-activated protein kinase gamma-1 subunit (LOC100136666) mRNA_x0001_gb-AY606033.1- Oncorhynchus mykiss 5'-AMP-activated protein kinase gamma-1 subunit mRNA complete cds	1.102	0.000533	PRKAG1		PRKAG1	1.102	protein kinase AMP-activated non-catalytic subunit gamma 1	Nucleus	kinase
	TC150604	XM_003199975	PREDICTED: Danio rerio NF-kB1 precursor protein (nfkb1) partial mRNA	1.101	0.04337	NFKB1		NFKB1	1.101	nuclear factor kappa B subunit 1	Nucleus	transcription regulator
	TC159573	NM_001141419	Salmo salar Sperm acrosome membrane-associated protein 4 (saca4) mRNA_x0001_gb-BT049535.2- Salmo salar clone ssal-evf-554-253 Sperm acrosome membrane-associated protein 4 precursor putative mRNA complete cds	1.099	0.000344	SPACA4		SPACA4	1.099	sperm acrosome associated 4	Other	other
	TC136012	not-annotated	not-annotated	1.099	0.006919	TMIGD2		TMIGD2	1.099	transmembrane and immunoglobulin domain containing 2	Other	other
	TC167513	not-annotated	not-annotated	1.098	0.007618	C1orf170		PERM1	1.098	PPARGC1 and ESRR induced regulator, muscle 1	Other	other
	IMM 748	AF281352	Oncorhynchus mykiss putative fibrinogen gamma A chain. mRNA partial cds	1.098	0.046824	FGG		FGG	1.098	fibrinogen gamma chain	Extracellular Space	other
	TC166983	NM_001160688	Oncorhynchus mykiss transport protein SEC61 subunit gamma (sc61g) mRNA_x0001_gb-BT073662.1- Oncorhynchus mykiss clone omyk-evn-504-263 transport protein SEC61 subunit gamma putative mRNA complete cds	1.098	0.000117	SEC61G		SEC61G	1.098	SEC61 translocon subunit gamma	Plasma Membrane	transporter
	TC163762	NM_001200233	Ictalurus punctatus UDP-glucuronosyltransferase (ugt) mRNA_x0001_gb-DQ866146.1- Ictalurus punctatus UDP-glucuronosyltransferase (UGT) mRNA complete cds	1.098	0.034547	UGT1A6		UGT1A6	1.098	UDP glucuronosyltransferase family 1 member A6	Cytoplasm	enzyme
	TC159667	BT027656	Gasterosteus aculeatus clone CGX76-D11 mRNA sequence	1.096	0.036097	REM2		REM2	1.096	RRAD and GEM like GTPase 2	Plasma Membrane	enzyme
	TC146325	CR726897	Tetraodon nigroviridis full-length cDNA	1.091	0.000172	DSP		DSP	1.091	desmoplakin	Plasma Membrane	other
	TC143985	BT045839	Salmo salar clone ssal-rgf-534-131 Nicotinic acid receptor 1 putative mRNA complete cds	1.091	0.000429	HCAR2		HCAR2	1.091	hydroxycarboxylic acid receptor 2	Plasma Membrane	G-protein coupled receptor
	TC141667	BT059050	Salmo salar clone ssal-rgf-522-307 Transcription factor MafB putative mRNA complete cds	1.089	0.010513	MAFB		MAFB	1.089	MAF bZIP transcription factor B	Nucleus	transcription regulator
	TC151768	EF605272	Acanthopagrus schlegelii Sox3 mRNA complete cds	1.088	0.000473	SOX3		SOX3	1.088	SRY-box transcription factor 3	Nucleus	transcription regulator
	TC143513	DQ199618	Paralichthys olivaceus DnaJ-like subfamily A member 4 (Hsp40A4) mRNA complete cds	1.086	0.001076	DNAJA4		DNAJA4	1.086	DnaJ heat shock protein family (Hsp40) member A4	Nucleus	other
	TC136475	NM_001124623	Oncorhynchus mykiss interleukin 21 receptor (il21r) mRNA_x0001_emb-AJ634731.1- Oncorhynchus mykiss mRNA for putative interleukin-21 receptor (il21r gene)	1.086	0.002179	IL7R		IL7R	1.086	interleukin 7 receptor	Plasma Membrane	cell surface receptor
	TC132666	NM_001124532	Oncorhynchus mykiss CD28-like protein (LOC100136274) mRNA_x0001_gb-AY789435.1- Oncorhynchus mykiss CD28-like protein mRNA complete cds	1.085	0.000317	CD28		CD28	1.085	CD28 molecule	Plasma Membrane	cell surface receptor
	TC168253	NM_001173559	Salmo salar ADP-ribosylation factor 1 like (arf1l) mRNA_x0001_gb-BT045630.1- Salmo salar clone ssal-rgf-527-050 ADP-ribosylation factor 1 putative mRNA complete cds	1.084	0.000459	ARF1		ARF1	1.084	ADP ribosylation factor 1	Cytoplasm	enzyme
	TC143550	NM_001159671	Mus musculus radial spoke head 6 homolog A (Chlamydomonas) (Rsph6a) transcript variant 2 mRNA	1.083	0.000233	RSPH6A		RSPH6A	1.083	radial spoke head 6 homolog A	Extracellular Space	other
	TC144960	CU693366	Zebrafish DNA sequence from clone CH1073-209E23 complete sequence	1.08	0.000939	FMN1		FMN1	1.08	formin 1	Nucleus	other
	TC152638	NM_001140195	Salmo salar Ras-related protein Rab-3D (rab3d) mRNA_x0001_gb-BT045406.1- Salmo salar clone ssal-rgf-520-160 Ras-related protein Rab-3D putative mRNA complete cds	1.08	0.022825	GALNT5		GALNT5	1.08	polypeptide N-acetylgalactosaminyltransferase 5	Cytoplasm	enzyme
	TC163542	BT071849	Salmo salar clone ssal-rgf-002-040 ATP-dependent RNA helicase DDX18 putative mRNA partial cds	1.077	0.000288	DDX18		DDX18	1.077	DEAD-box helicase 18	Nucleus	enzyme
	TC132783	GU129139	Salmo salar IgH locus A genomic sequence	1.076	0.000816	C19orf52		TIMM29	1.076	translocase of inner mitochondrial membrane 29	Cytoplasm	other
	TC146351	NM_001124634	Oncorhynchus mykiss leukotriene b4 12-hydroxydehydrogenase/15-ketoreductase (LOC100136663) mRNA_x0001_gb-AY594698.1- Oncorhynchus mykiss leukotriene b4 12-hydroxydehydrogenase/15-ketoreductase mRNA complete cds	1.076	0.000267	PTGR1		PTGR1	1.076	prostaglandin reductase 1	Cytoplasm	enzyme
	TC154500	BT072385	Salmo salar clone ssal-rgf-523-204 DNA topoisomerase 1 putative mRNA pseudogene cds	1.075	0.000122	TOP1		TOP1	1.075	DNA topoisomerase I	Nucleus	enzyme
	TC132327	NM_001124492	Oncorhynchus mykiss metal response element-binding transcription factor (mtf) mRNA_x0001_gb-AY586336.1- Oncorhynchus mykiss metal response element-binding transcription factor isoform H (MTF) mRNA complete cds; alternatively spliced	1.074	0.012256	MTF1		MTF1	1.074	metal regulatory transcription factor 1	Nucleus	transcription regulator
	TC153746	NM_001140142	Salmo salar EH-domain containing 3 (ehd3) mRNA_x0001_gb-BT045311.1- Salmo salar clone ssal-rgf-518-062 EH domain-containing protein 3 putative mRNA complete cds	1.073	0.012572	EHD4		EHD4	1.073	EH domain containing 4	Plasma Membrane	enzyme
	TC161947	BT059736	Salmo salar clone ssal-rgf-525-319 Ras-related protein Rab-7a putative mRNA complete cds	1.071	0.001025	RAB7A		RAB7A	1.071	RAB7A, member RAS oncogene family	Cytoplasm	enzyme
	TC142784	AF256661	Salmo salar clone BHMS111 microsatellite sequence	1.07	0.00044	CHD1		CHD1	1.07	chromodomain helicase DNA binding protein 1	Nucleus	enzyme
	TC157671	NM_001124211	Oncorhynchus mykiss atrial natriuretic peptide (anp) mRNA_x0001_dbj-AB076603.1- Oncorhynchus mykiss anp mRNA for atrial natriuretic peptide complete cds	1.067	0.000754	NPPA		NPPA	1.067	natriuretic peptide A	Extracellular Space	other
	TC147726	BT046273	Salmo salar clone ssal-evf-520-147 Nascent polypeptide-associated complex subunit alpha putative mRNA complete cds	1.066	0.001969	NACA		NACA	1.066	nascent polypeptide associated complex subunit alpha	Cytoplasm	transcription regulator
	TC151531	XM_679071	PREDICTED: Danio rerio si:ch211-196f5.1 (si:ch211-196f5.1) mRNA	1.064	0.010598	IPO4		IPO4	1.064	importin 4	Nucleus	transporter
	TC141623	XM_690251	PREDICTED: Danio rerio si:dkeyp-115a10.3 (si:dkeyp-115a10.3) mRNA	1.063	0.013494	MFSD2A		MFSD2A	1.063	major facilitator superfamily domain containing 2A	Plasma Membrane	transporter
	TC169918	BT059711	Salmo salar clone ssal-rgf-524-184 Integrin beta-1 precursor putative mRNA complete cds	1.062	0.000425	ITGB1		ITGB1	1.062	integrin subunit beta 1	Plasma Membrane	cell surface receptor
	TC155529	NM_001124733	Oncorhynchus mykiss prolactin (LOC100136792) mRNA_x0001_gb-M24738.1-SMOPROLACT Rainbow trout prolactin mRNA complete cds	1.061	0.04466	PRL		PRL	1.061	prolactin	Extracellular Space	cytokine
	TC147619	not-annotated	not-annotated	1.06	0.000511	LRRC8C		LRRC8C	1.06	leucine rich repeat containing 8 VRAC subunit C	Plasma Membrane	ion channel
	TC161447	NM_001165245	Oncorhynchus mykiss Apoptosis-inducing factor-like mitochondrion-associated inducer of death (amid) nuclear gene encoding mitochondrial protein mRNA_x0001_gb-BT074103.1- Oncorhynchus mykiss clone omyk-evo-513-349 Apoptosis-inducing factor-like mitochondrion-associated inducer of death putative mRNA complete cds	1.057	0.000108	AIFM2		AIFM2	1.057	apoptosis inducing factor mitochondria associated 2	Cytoplasm	enzyme
	TC164203	NM_213144	Danio rerio far upstream element (FUSE) binding protein 1 (fubp1) mRNA_x0001_gb-BC064649.1- Danio rerio far upstream element (FUSE) binding protein 1 mRNA (cDNA clone MGC:66046 IMAGE:6794933) complete cds	1.056	0.003546	FUBP1		FUBP1	1.056	far upstream element binding protein 1	Nucleus	transcription regulator
	TC160975	AC189974	Gasterosteus aculeatus clone VMRC28-91C03 complete sequence	1.055	0.000435	ABL1		ABL1	1.055	ABL proto-oncogene 1, non-receptor tyrosine kinase	Nucleus	kinase
	TC161291	BC045317	Danio rerio N-acetyltransferase 10 mRNA (cDNA clone IMAGE:2601459) containing frame-shift errors	1.055	0.005767	NAT10		NAT10	1.055	N-acetyltransferase 10	Nucleus	enzyme
	TC144651	BT058720	Salmo salar clone ssal-rgf-001-050 Tubulin beta-1 chain putative mRNA complete cds	1.055	0.000342	TUBB3		TUBB3	1.055	tubulin beta 3 class III	Cytoplasm	other
	TC137377	BT045332	Salmo salar clone ssal-rgf-518-256 Leucine-rich repeat-containing protein 58 putative mRNA complete cds	1.052	0.005888	LRRC58		LRRC58	1.052	leucine rich repeat containing 58	Other	other
	TC159415	EU025684	Salmo salar homeobox protein HoxA7aa (HoxA7aa) gene complete cds	1.051	0.034462	HOXA7		HOXA7	1.051	homeobox A7	Nucleus	transcription regulator
	TC167148	BT030700	Bos taurus hydroxy-delta-5-steroid dehydrogenase 3 beta- and steroid delta-isomerase 7 (HSD3B7) mRNA complete cds	1.051	0.000314	HSD3B7		HSD3B7	1.051	hydroxy-delta-5-steroid dehydrogenase, 3 beta- and steroid delta-isomerase 7	Cytoplasm	enzyme
	TC166283	BT056428	Salmo salar clone ssal-evf-542-346 Histone H3.3 putative mRNA complete cds	1.05	0.044598	PRKD2		PRKD2	1.05	protein kinase D2	Cytoplasm	kinase
	TC149941	XM_002663280	PREDICTED: Danio rerio si:ch1073-55a19.2 (si:ch1073-55a19.2) mRNA	1.047	0.008581	RANBP2		RANBP2	1.047	RAN binding protein 2	Nucleus	enzyme
	TC167087	NM_001140425	Salmo salar Serine protease 23 (prs23) mRNA_x0001_gb-BT045840.1- Salmo salar clone ssal-rgf-534-154 Serine protease 23 precursor putative mRNA complete cds	1.047	0.008555	TPRXL		TPRXL	1.047	tetrapeptide repeat homeobox like (pseudogene)	Other	other
	TC161055	BT076129	Caligus rogercresseyi clone crog-evp-503-093 Chloride intracellular channel protein 2 putative mRNA complete cds	1.046	0.000435	CLIC2		CLIC2	1.046	chloride intracellular channel 2	Cytoplasm	enzyme
	TC152928	NM_001140308	Salmo salar Suppressor of IKK-epsilon (sike) mRNA_x0001_gb-BT045625.1- Salmo salar clone ssal-rgf-526-361 Suppressor of IKK-epsilon putative mRNA complete cds	1.046	0.000652	SIKE1		SIKE1	1.046	suppressor of IKBKE 1	Cytoplasm	other
	TC157004	NM_001123656	Salmo salar fast myotomal muscle tropomyosin (LOC100136562) mRNA_x0001_gb-L25609.1-SMOFMTRMYA Salmo salar fast myotomal muscle tropomyosin mRNA complete cds	1.04	0.002444	BAG4		BAG4	1.04	BAG cochaperone 4	Cytoplasm	other
	TC143893	NM_001145359	Danio rerio si:ch211-217k17.7 (si:ch211-217k17.7) mRNA	1.04	0.020927	CCDC86		CCDC86	1.04	coiled-coil domain containing 86	Nucleus	other
	TC162720	not-annotated	not-annotated	1.04	0.023063	ZNF501		ZNF501	1.04	zinc finger protein 501	Nucleus	transcription regulator
	TC160901	FJ438483	Epinephelus coioides epiplakin-like protein mRNA partial cds	1.039	0.000139	EPPK1		EPPK1	1.039	epiplakin 1	Cytoplasm	other
	TC147337	NM_001124260	Oncorhynchus mykiss apolipoprotein CII (LOC100135886) mRNA_x0001_gb-AF140783.1-AF140783 Oncorhynchus mykiss apolipoprotein CII mRNA complete cds	1.036	0.000301	APOC2		APOC2	1.036	apolipoprotein C2	Extracellular Space	transporter
	TC162931	not-annotated	not-annotated	1.036	0.000598	METRNL		METRNL	1.036	meteorin like, glial cell differentiation regulator	Cytoplasm	other
	TC148048	NM_001141807	Salmo salar Rho-related GTP-binding protein RhoB (rhob) mRNA_x0001_gb-BT045934.1- Salmo salar clone ssal-rgf-537-042 Rho-related GTP-binding protein RhoB precursor putative mRNA complete cds	1.035	0.000268	RHOB		RHOB	1.035	ras homolog family member B	Cytoplasm	enzyme
	TC137840	BT125411	Salmo salar clone ssal-rgb2-559-363 Sjoegren syndrome/scleroderma autoantigen 1 homolog putative mRNA complete cds	1.035	0.033102	SSSCA1		ZNRD2	1.035	zinc ribbon domain containing 2	Other	other
	CUST_73_PI420312184	NM_001160612	Oncorhynchus mykiss ADP-ribosylation factor 4 (arf4) mRNA_x0001_gb-BT073389.1- Oncorhynchus mykiss clone omyk-evn-512-122 ADP-ribosylation factor 4 putative mRNA complete cds	1.033	0.000112	ARF5		ARF5	1.033	ADP ribosylation factor 5	Cytoplasm	enzyme
	TC135201	BT059793	Salmo salar clone ssal-rgf-503-059 High mobility group protein B3 putative mRNA complete cds	1.033	0.000519	HMGB3		HMGB3	1.033	high mobility group box 3	Nucleus	other
	TC158167	BT073341	Oncorhynchus mykiss clone omyk-evn-512-056 Ubiquitin-like protein FUBI putative mRNA complete cds	1.032	0.000989	FAU		FAU	1.032	FAU ubiquitin like and ribosomal protein S30 fusion	Cytoplasm	other
	TC155716	NM_001173852	Salmo salar peroxisome biogenesis factor 13 (pex13) mRNA_x0001_gb-BT059647.1- Salmo salar clone ssal-rgf-525-118 Peroxisomal membrane protein PEX13 putative mRNA complete cds	1.03	0.005788	PEX13		PEX13	1.03	peroxisomal biogenesis factor 13	Cytoplasm	transporter
	TC165652	not-annotated	not-annotated	1.03	0.00533	TNK2		TNK2	1.03	tyrosine kinase non receptor 2	Cytoplasm	kinase
	TC172045	AF281333	Oncorhynchus mykiss biotinidase fragment 2 mRNA partial cds	1.028	0.044534	BTD		BTD	1.028	biotinidase	Extracellular Space	enzyme
	TC132447	NM_001124631	Oncorhynchus mykiss corticotropin releasing factor binding protein precursor (crf-bp) mRNA_x0001_gb-AY363677.1- Oncorhynchus mykiss corticotropin releasing factor binding protein precursor (CRF-BP) mRNA complete cds	1.027	0.001316	CRHBP		CRHBP	1.027	corticotropin releasing hormone binding protein	Extracellular Space	other
	IMM 329	BT027308	Gasterosteus aculeatus clone CFW238-F09 mRNA sequence	1.026	0.010968	OXSR1		OXSR1	1.026	oxidative stress responsive kinase 1	Nucleus	kinase
	TC150903	not-annotated	not-annotated	1.026	0.000564	SCRT2		SCRT2	1.026	scratch family transcriptional repressor 2	Nucleus	transcription regulator
	TC160462	BT073416	Oncorhynchus mykiss clone omyk-evn-511-310 Mitochondrial import inner membrane translocase subunit Tim23 putative mRNA complete cds	1.026	0.000416	TIMM23		TIMM23	1.026	translocase of inner mitochondrial membrane 23	Cytoplasm	transporter
	TC164471	BT072120	Salmo salar clone ssal-rgf-512-187 Tubulin alpha-1C chain putative mRNA partial cds	1.026	0.00047	TUBA1C		TUBA1C	1.026	tubulin alpha 1c	Cytoplasm	other
	TC166098	XM_003215683	PREDICTED: Anolis carolinensis collagen alpha-1(XII) chain-like (LOC100555585) mRNA	1.025	0.006844	COL12A1		COL12A1	1.025	collagen type XII alpha 1 chain	Extracellular Space	other
	TC148994	BT072175	Salmo salar clone ssal-rgf-515-081 unknown large open reading frame mRNA novel cds	1.023	0.001097	RNASEK		RNASEK	1.023	ribonuclease K	Other	peptidase
	TC169118	NM_001141723	Salmo salar transglutaminase 2 C polypeptide (tgm2) mRNA_x0001_gb-BT044878.1- Salmo salar clone ssal-rgf-506-116 Protein-glutamine gamma-glutamyltransferase 2 putative mRNA complete cds	1.023	0.001364	TGM2		TGM2	1.023	transglutaminase 2	Cytoplasm	enzyme
	TC138182	BT072592	Salmo salar clone ssal-rgf-531-322 Eukaryotic translation initiation factor 3 subunit J putative mRNA pseudogene cds	1.021	0.020725	EIF3J		EIF3J	1.021	eukaryotic translation initiation factor 3 subunit J	Cytoplasm	translation regulator
	TC159927	BT057560	Salmo salar clone ssal-rgb2-594-023 10 kDa heat shock protein mitochondrial putative mRNA complete cds	1.021	0.00039	HSPE1		HSPE1	1.021	heat shock protein family E (Hsp10) member 1	Cytoplasm	enzyme
	TC154728	NM_001165361	Salmo salar Transmembrane protein 56-B (tm56b) mRNA_x0001_gb-BT058863.1- Salmo salar clone ssal-rgf-508-337 Transmembrane protein 56-B putative mRNA complete cds	1.02	0.000391	TMEM56		TLCD4	1.02	TLC domain containing 4	Other	other
	TC136325	CR683444	Tetraodon nigroviridis full-length cDNA	1.019	0.000492	JTB		JTB	1.019	jumping translocation breakpoint	Plasma Membrane	other
	TC159631	BT057205	Salmo salar clone ssal-evd-533-068 C21orf51 putative mRNA complete cds	1.019	0.000713	SMIM11		SMIM11A	1.019	small integral membrane protein 11A	Plasma Membrane	other
	TC159300	HQ021732	Sparus aurata clone contig01026 genomic sequence	1.018	0.000279	IPO7		IPO7	1.018	importin 7	Nucleus	transporter
	TC168696	NM_001141795	Salmo salar lipolysis stimulated lipoprotein receptor (lsr) mRNA_x0001_gb-BT045785.1- Salmo salar clone ssal-rgf-531-083 Lipolysis-stimulated lipoprotein receptor precursor putative mRNA complete cds	1.017	0.000272	LSR		LSR	1.017	lipolysis stimulated lipoprotein receptor	Nucleus	transcription regulator
	TC150387	NM_200260	Danio rerio protein phosphatase 4 regulatory subunit 1 (ppp4r1) mRNA_x0001_gb-BC048878.1- Danio rerio protein phosphatase 4 regulatory subunit 1 mRNA (cDNA clone MGC:55603 IMAGE:2643612) complete cds	1.016	0.001387	PPP4R1		PPP4R1	1.016	protein phosphatase 4 regulatory subunit 1	Other	phosphatase
	TC166491	XM_688892	PREDICTED: Danio rerio polyribonucleotide 5'-hydroxyl-kinase Clp1-like (LOC565621) mRNA	1.015	0.000584	CLP1		CLP1	1.015	cleavage factor polyribonucleotide kinase subunit 1	Nucleus	kinase
	TC134382	XM_003275793	PREDICTED: Nomascus leucogenys mediator of RNA polymerase II transcription subunit 26-like (LOC100588789) mRNA	1.015	0.000968	MED26		MED26	1.015	mediator complex subunit 26	Nucleus	transcription regulator
	TC159353	EU025708	Salmo salar EAP30 subunit of ELL complex a (Eap30a) nuclear domain 10 protein 52 a (Ndp52a) tubulin tyrosine ligase-like family member 6a (BAC05032) homeobox protein HoxB8ba (HoxB8ba) homeobox protein HoxB6ba (HoxB6ba) homeobox protein HoxB5ba (HoxB5ba) homeobox protein HoxB3ba (HoxB3ba) homeobox protein HoxB1ba (HoxB1ba) Src family associated phosphoprotein 1 (Scap1) sorting nexin 11 (Snx11) chr…	1.015	0.002517	NFE2L1		NFE2L1	1.015	nuclear factor, erythroid 2 like 1	Nucleus	transcription regulator
	TC148492	NM_001165344	Salmo salar S-adenosylmethionine decarboxylase proenzyme (dcam) mRNA_x0001_gb-BT058814.1- Salmo salar clone ssal-rgf-504-333 S-adenosylmethionine decarboxylase proenzyme putative mRNA complete cds	1.014	0.003529	AMD1		AMD1	1.014	adenosylmethionine decarboxylase 1	Cytoplasm	enzyme
	TC139263	BT059278	Salmo salar clone ssal-rgf-538-106 Nucleolar protein 5A putative mRNA complete cds	1.014	0.001111	NOP56		NOP56	1.014	NOP56 ribonucleoprotein	Nucleus	other
	TC165063	NM_001173609	Salmo salar Serine/threonine-protein phosphatase 2A catalytic subunit alpha isoform (pp2aa) mRNA_x0001_gb-BT059043.1- Salmo salar clone ssal-rgf-522-013 Serine/threonine-protein phosphatase 2A catalytic subunit alpha isoform putative mRNA complete cds	1.012	0.001649	PPP2CB		PPP2CB	1.012	protein phosphatase 2 catalytic subunit beta	Cytoplasm	phosphatase
	TC133215	BT059055	Salmo salar clone ssal-rgf-522-352 Caspase-8 precursor putative mRNA complete cds	1.011	0.000181	CASP8		CASP8	1.011	caspase 8	Nucleus	peptidase
	TC133143	NM_001140335	Salmo salar ChaC cation transport regulator-like 1 (chac1) mRNA_x0001_gb-BT045671.1- Salmo salar clone ssal-rgf-528-175 Cation transport regulator-like protein 1 putative mRNA complete cds	1.011	0.00079	CHAC1		CHAC1	1.011	ChaC glutathione specific gamma-glutamylcyclotransferase 1	Cytoplasm	enzyme
	TC135576	XM_002665651	PREDICTED: Danio rerio hypothetical LOC568145 (LOC568145) mRNA	1.011	0.036093	FAM89A		FAM89A	1.011	family with sequence similarity 89 member A	Other	other
	TC164617	NM_001140492	Salmo salar tubulin folding cofactor B (tbcb) mRNA_x0001_gb-BT045966.1- Salmo salar clone ssal-rgf-537-346 Tubulin folding cofactor B putative mRNA complete cds	1.011	0.004701	TBCB		TBCB	1.011	tubulin folding cofactor B	Cytoplasm	other
	TC150571	NM_001141216	Salmo salar THAP domain-containing protein 1 (thap1) mRNA_x0001_gb-BT048687.2- Salmo salar clone ssal-eve-548-164 THAP domain-containing protein 1 putative mRNA complete cds	1.011	0.001108	THAP1		THAP1	1.011	THAP domain containing 1	Nucleus	transcription regulator
	TC147902	NM_001140880	Salmo salar Cellular retinoic acid-binding protein (rabp) mRNA_x0001_gb-BT047386.2- Salmo salar clone ssal-eve-540-090 Cellular retinoic acid-binding protein putative mRNA complete cds	1.01	0.001076	CRABP2		CRABP2	1.01	cellular retinoic acid binding protein 2	Cytoplasm	transporter
	TC157471	NM_001144040	Danio rerio component of oligomeric golgi complex 3 (cog3) mRNA	1.009	0.004343	COG3		COG3	1.009	component of oligomeric golgi complex 3	Cytoplasm	other
	TC148436	FQ310507	Dicentrarchus labrax chromosome sequence corresponding to linkage group 1 bottom part complete sequence	1.009	0.00115	MKL1		MRTFA	1.009	myocardin related transcription factor A	Nucleus	transcription regulator
	TC161634	BT045802	Salmo salar clone ssal-rgf-531-328 TSC22 domain family protein 3 putative mRNA complete cds	1.006	0.021678	TSC22D3		TSC22D3	1.006	TSC22 domain family member 3	Nucleus	transcription regulator
	TC137224	BT045644	Salmo salar clone ssal-rgf-527-229 BTG2 putative mRNA complete cds	1.005	0.000264	BTG2		BTG2	1.005	BTG anti-proliferation factor 2	Nucleus	transcription regulator
	TC144400	NM_001200937	Ictalurus punctatus apoptosis regulator bax (bax) mRNA_x0001_gb-GU589276.1- Ictalurus punctatus clone CBZB25609 apoptosis regulator bax (BAX) mRNA complete cds	1.004	0.002568	BAX		BAX	1.004	BCL2 associated X, apoptosis regulator	Cytoplasm	transporter
	TC145234	BT045521	Salmo salar clone ssal-rgf-524-002 Cyclin-dependent kinase inhibitor 1B putative mRNA complete cds	1.004	0.002419	CDKN1B		CDKN1B	1.004	cyclin dependent kinase inhibitor 1B	Nucleus	kinase
	TC162251	AB258536	Oncorhynchus mykiss Onmy-LDA gene for MHC class I antigen allele: Onmy-LDA*0101 and other genes complete cds	1.003	0.025403	RPS23		RPS23	1.003	ribosomal protein S23	Cytoplasm	translation regulator
	TC165170	NM_001141264	Salmo salar 1-acyl-sn-glycerol-3-phosphate acyltransferase delta (plcd) mRNA_x0001_gb-BT048835.1- Salmo salar clone ssal-plnb-512-379 1-acyl-sn-glycerol-3-phosphate acyltransferase delta putative mRNA complete cds	1.001	0.016931	AGPAT4		AGPAT4	1.001	1-acylglycerol-3-phosphate O-acyltransferase 4	Cytoplasm	enzyme
	TC146839	not-annotated	not-annotated	-1.001	0.000377	PLA2G4B		PLA2G4B	-1.001	phospholipase A2 group IVB	Cytoplasm	enzyme
	TC168224	AF256771	Salmo salar clone BHMS131 microsatellite sequence	-1.001	0.011899	WDSUB1		WDSUB1	-1.001	WD repeat, sterile alpha motif and U-box domain containing 1	Other	other
	TC133878	GU588294	Ictalurus furcatus clone CBZF23280 charged multivesicular body protein 2b (CHM2B) mRNA complete cds	-1.002	0.018879	VPS2B		-	-1.002	-	-	-
	TC138918	BT048339	Salmo salar clone ssal-evf-516-207 FK506-binding protein 11 precursor putative mRNA complete cds	-1.004	0.002641	FKBP11		FKBP11	-1.004	FKBP prolyl isomerase 11	Cytoplasm	enzyme
	TC147552	BT125482	Salmo salar clone ssal-evd-543-036 Vacuolar-sorting protein SNF8 putative mRNA complete cds	-1.004	0.000306	SNF8		SNF8	-1.004	SNF8 subunit of ESCRT-II	Cytoplasm	enzyme
	TC141086	NM_001140765	Salmo salar sprouty (Drosophila) homolog 4 (spry4) mRNA_x0001_gb-BT046928.1- Salmo salar clone ssal-eve-006-381 SPRY domain-containing protein 4 putative mRNA complete cds	-1.005	0.003272	SPRYD4		SPRYD4	-1.005	SPRY domain containing 4	Cytoplasm	other
	TC134902	BT074571	Osmerus mordax clone omor-rgc-504-122 Replication factor C subunit 3 putative mRNA complete cds	-1.006	0.031015	RFC3		RFC3	-1.006	replication factor C subunit 3	Nucleus	enzyme
	TC142757	NM_001077316	Danio rerio zgc:153051 (zgc:153051) mRNA_x0001_gb-BC124629.1- Danio rerio zgc:153051 mRNA (cDNA clone MGC:153051 IMAGE:7222484) complete cds	-1.009	0.001516	NUDT8		NUDT8	-1.009	nudix hydrolase 8	Cytoplasm	other
	TC139914	BT072111	Salmo salar clone ssal-rgf-512-078 Translocation-associated membrane protein 2 putative mRNA partial cds	-1.013	0.01071	TRAM2		TRAM2	-1.013	translocation associated membrane protein 2	Other	other
	TC157732	NM_001140617	Salmo salar Bardet-Biedl syndrome 5 (bbs5) mRNA_x0001_gb-BT046394.1- Salmo salar clone ssal-eve-576-064 Bardet-Biedl syndrome 5 protein homolog putative mRNA complete cds	-1.014	0.005616	BBS5		BBS5	-1.014	Bardet-Biedl syndrome 5	Cytoplasm	other
	TC146249	NM_001140029	Salmo salar ilvB (bacterial acetolactate synthase)-like (ilvbl) mRNA_x0001_gb-BT045095.1- Salmo salar clone ssal-rgf-511-330 Acetolactate synthase-like protein putative mRNA complete cds	-1.016	0.00404	ILVBL		ILVBL	-1.016	ilvB acetolactate synthase like	Cytoplasm	enzyme
	TC150137	FR851410	Oncorhynchus mykiss mRNA for complement factor D (cfd gene)	-1.018	0.019298	CFD		CFD	-1.018	complement factor D	Extracellular Space	peptidase
	IMM 235	NM_001124178	Oncorhynchus mykiss tFZR1 (LOC100135780) mRNA_x0001_dbj-AB006153.1- Oncorhynchus mykiss mRNA for tFZR1 complete cds	-1.02	0.001093	HTATSF1		HTATSF1	-1.02	HIV-1 Tat specific factor 1	Nucleus	transcription regulator
	TC133646	XM_002589017	Branchiostoma floridae hypothetical protein mRNA	-1.02	0.000538	LACTB2		LACTB2	-1.02	lactamase beta 2	Cytoplasm	enzyme
	TC156091	NM_001165307	Salmo salar HIRA-interacting protein 3 (hirp3) mRNA_x0001_gb-BT058723.1- Salmo salar clone ssal-rgf-001-082 HIRA-interacting protein 3 putative mRNA complete cds	-1.021	0.018533	HIRIP3		HIRIP3	-1.021	HIRA interacting protein 3	Nucleus	other
	TC144443	BC171472	Danio rerio si:rp71-45k5.3 mRNA (cDNA clone MGC:198199 IMAGE:9039188) complete cds	-1.021	0.020904	WDYHV1		NTAQ1	-1.021	N-terminal glutamine amidase 1	Cytoplasm	enzyme
	TC132653	BT059450	Salmo salar clone ssal-rgf-506-287 Acidic leucine-rich nuclear phosphoprotein 32 family member E putative mRNA complete cds	-1.023	0.000715	ANP32E		ANP32E	-1.023	acidic nuclear phosphoprotein 32 family member E	Nucleus	other
	TC151262	BT045429	Salmo salar clone ssal-rgf-521-119 Transmembrane protein 127 putative mRNA complete cds	-1.025	0.000277	TMEM127		TMEM127	-1.025	transmembrane protein 127	Other	other
	TC137233	NM_201103	Danio rerio zgc:56702 (zgc:56702) mRNA_x0001_gb-BC049533.1- Danio rerio zgc:56702 mRNA (cDNA clone MGC:56702 IMAGE:6034221) complete cds	-1.026	0.03079	CWC27		CWC27	-1.026	CWC27 spliceosome associated cyclophilin	Nucleus	enzyme
	TC166492	BT057655	Salmo salar clone ssal-rgb2-639-016 GATA zinc finger domain-containing protein 1 putative mRNA complete cds	-1.028	0.014401	GATAD1		GATAD1	-1.028	GATA zinc finger domain containing 1	Nucleus	transcription regulator
	TC138004	NM_001141048	Salmo salar heterogeneous nuclear ribonucleoprotein L (hnrpl) mRNA_x0001_gb-BT048062.1- Salmo salar clone ssal-eve-541-145 Heterogeneous nuclear ribonucleoprotein L putative mRNA complete cds	-1.03	0.011068	DENND3		DENND3	-1.03	DENN domain containing 3	Cytoplasm	other
	TC133460	BT060219	Salmo salar clone ssal-rgh-509-222 Phenazine biosynthesis-like domain-containing protein 2 putative mRNA complete cds	-1.033	0.018369	PBLD		PBLD	-1.033	phenazine biosynthesis like protein domain containing	Cytoplasm	enzyme
	TC168891	BT072155	Salmo salar clone ssal-rgf-514-052 DENN domain-containing protein 4C putative mRNA pseudogene cds	-1.037	0.000455	DENND4C		DENND4C	-1.037	DENN domain containing 4C	Cytoplasm	other
	TC132913	NM_001140945	Salmo salar fumarylacetoacetate hydrolase domain containing 1 (fahd1) nuclear gene encoding mitochondrial protein mRNA_x0001_gb-BT047629.1- Salmo salar clone ssal-eve-573-155 Fumarylacetoacetate hydrolase domain-containing protein 1 putative mRNA complete cds	-1.042	0.000365	FAHD1		FAHD1	-1.042	fumarylacetoacetate hydrolase domain containing 1	Cytoplasm	enzyme
	TC171789	BT059014	Salmo salar clone ssal-rgf-520-138 Phospholipid scramblase 1 putative mRNA complete cds	-1.043	0.000172	PLSCR1		PLSCR1	-1.043	phospholipid scramblase 1	Plasma Membrane	enzyme
	TC136999	BT049486	Salmo salar clone ssal-sjb-016-119 GSK-3-binding protein putative mRNA complete cds	-1.044	0.001665	FRAT2		FRAT2	-1.044	FRAT regulator of WNT signaling pathway 2	Cytoplasm	other
	TC133886	BT048579	Salmo salar clone ssal-eve-579-216 Glutathione S-transferase P putative mRNA complete cds	-1.045	0.010673	GSTP1		GSTP1	-1.045	glutathione S-transferase pi 1	Cytoplasm	enzyme
	TC169393	NM_001124376	Oncorhynchus mykiss keratin 13 (k13) mRNA_x0001_emb-AJ427867.1- Oncorhynchus mykiss mRNA for Keratin 13 (k13 gene)	-1.046	0.002165	KRT14		KRT14	-1.046	keratin 14	Cytoplasm	other
	TC132846	BC096973	Danio rerio zgc:101035 mRNA (cDNA clone MGC:113864 IMAGE:5603797) complete cds	-1.054	0.012072	RSG1		CPLANE2	-1.054	ciliogenesis and planar polarity effector 2	Cytoplasm	other
	TC146881	not-annotated	not-annotated	-1.056	0.000658	FSCB		FSCB	-1.056	fibrous sheath CABYR binding protein	Other	other
	TC160716	BT045030	Salmo salar clone ssal-rgf-510-110 Histone H1-beta late embryonic putative mRNA complete cds	-1.056	0.000472	HP1BP3		HP1BP3	-1.056	heterochromatin protein 1 binding protein 3	Nucleus	other
	TC166262	not-annotated	not-annotated	-1.061	0.008583	MXRA5		MXRA5	-1.061	matrix remodeling associated 5	Extracellular Space	other
	TC155792	BT072195	Salmo salar clone ssal-rgf-516-125 E3 ubiquitin-protein ligase BRE1B putative mRNA pseudogene cds	-1.063	0.009524	RNF40		RNF40	-1.063	ring finger protein 40	Cytoplasm	enzyme
	TC139747	XM_689796	PREDICTED: Danio rerio rho GTPase-activating protein 27-like (LOC566523) mRNA	-1.066	0.000336	ARHGAP27		ARHGAP27	-1.066	Rho GTPase activating protein 27	Cytoplasm	other
	TC156423	BT075466	Osmerus mordax clone omor-eva-514-105 Sorting nexin-24 putative mRNA complete cds	-1.067	0.00698	SNX24		SNX24	-1.067	sorting nexin 24	Other	transporter
	TC136733	BT047163	Salmo salar clone ssal-rgb2-501-155 C10orf84 homolog putative mRNA complete cds	-1.07	0.000439	FAM204A		FAM204A	-1.07	family with sequence similarity 204 member A	Other	other
	TC146736	NM_001173723	Salmo salar makorin ring finger protein 2 (mkrn2) mRNA_x0001_gb-BT059336.1- Salmo salar clone ssal-rgf-503-017 Makorin-2 putative mRNA complete cds	-1.07	0.011116	MKRN2		MKRN2	-1.07	makorin ring finger protein 2	Other	other
	TC150877	not-annotated	not-annotated	-1.071	0.015805	DENND5B		DENND5B	-1.071	DENN domain containing 5B	Cytoplasm	other
	TC141732	NM_001140025	Salmo salar TM2 domain-containing protein 2 (tm2d2) mRNA_x0001_gb-BT045089.1- Salmo salar clone ssal-rgf-511-290 TM2 domain-containing protein 2 precursor putative mRNA complete cds	-1.071	0.014915	TM2D2		TM2D2	-1.071	TM2 domain containing 2	Extracellular Space	other
	TC155855	not-annotated	not-annotated	-1.071	0.006321	TRIM14		TRIM14	-1.071	tripartite motif containing 14	Cytoplasm	other
	TC148598	NM_001140063	Salmo salar Kunitz-type protease inhibitor 2 (spit2) mRNA_x0001_gb-BT045164.1- Salmo salar clone ssal-rgf-513-356 Kunitz-type protease inhibitor 2 precursor putative mRNA complete cds	-1.074	0.014401	SPINT2		SPINT2	-1.074	serine peptidase inhibitor, Kunitz type 2	Extracellular Space	other
	TC164125	CR732218	Tetraodon nigroviridis full-length cDNA	-1.075	0.003711	MYOC		MYOC	-1.075	myocilin	Cytoplasm	other
	TC144625	NM_001195412	Oncorhynchus mykiss DEC-205/CD205 (ly75) mRNA_x0001_gb-GQ468309.1- Oncorhynchus mykiss DEC-205/CD205 protein mRNA complete cds	-1.08	0.000276	LY75-CD302		LY75-CD302	-1.08	LY75-CD302 readthrough	Other	other
	TC138137	BT057855	Salmo salar clone ssal-evf-529-159 C1orf149 homolog putative mRNA complete cds	-1.08	0.000336	MEAF6		MEAF6	-1.08	MYST/Esa1 associated factor 6	Nucleus	other
	TC168465	FQ310507	Dicentrarchus labrax chromosome sequence corresponding to linkage group 1 bottom part complete sequence	-1.082	0.001123	RND2		RND2	-1.082	Rho family GTPase 2	Cytoplasm	enzyme
	TC148827	NM_200925	Danio rerio staufen RNA binding protein homolog 2 (Drosophila) (stau2) mRNA_x0001_gb-BC045292.1- Danio rerio staufen RNA binding protein homolog 2 (Drosophila) mRNA (cDNA clone MGC:55287 IMAGE:2600097) complete cds	-1.083	0.007144	STAU2		STAU2	-1.083	staufen double-stranded RNA binding protein 2	Cytoplasm	other
	TC159229	AL929389	Zebrafish DNA sequence from clone CH211-51H4 in linkage group 11 Contains the 3' end of the gene for a novel protein similar to vertebrate transducin (beta)-like 1X-linked receptor 1 (TBL1XR1 zgc:110312) and three CpG islands complete sequence	-1.085	0.000426	TBL1XR1		TBL1XR1	-1.085	TBL1X receptor 1	Nucleus	transcription regulator
	IMM 1023	NM_001124517	Oncorhynchus mykiss vascular cell adhesion molecule-like protein (LOC100136253) mRNA_x0001_gb-AY606042.1- Oncorhynchus mykiss vascular cell adhesion molecule-like protein mRNA complete cds	-1.09	0.04417	VCAM1		VCAM1	-1.09	vascular cell adhesion molecule 1	Plasma Membrane	cell surface receptor
	TC133578	BT075205	Osmerus mordax clone omor-rgc-502-368 Parkin putative mRNA complete cds	-1.093	0.031017	PARK2		PRKN	-1.093	parkin RBR E3 ubiquitin protein ligase	Cytoplasm	enzyme
	TC153351	NM_001140329	Salmo salar Bifunctional 3-phosphoadenosine 5-phosphosulfate synthetase 2 (paps2) mRNA_x0001_gb-BT045659.1- Salmo salar clone ssal-rgf-528-024 Bifunctional 3-phosphoadenosine 5-phosphosulfate synthetase 2 putative mRNA complete cds	-1.096	0.003879	PAPSS2		PAPSS2	-1.096	3'-phosphoadenosine 5'-phosphosulfate synthase 2	Cytoplasm	enzyme
	TC160723	not-annotated	not-annotated	-1.099	0.000695	COPS7B		COPS7B	-1.099	COP9 signalosome subunit 7B	Cytoplasm	other
	TC133764	BT059181	Salmo salar clone ssal-rgf-531-019 6-phosphofructo-2-kinase/fructose-26-biphosphatase 4 putative mRNA complete cds	-1.099	0.045504	PFKFB4		PFKFB4	-1.099	6-phosphofructo-2-kinase/fructose-2,6-biphosphatase 4	Cytoplasm	kinase
	TC172376	BX119963	Zebrafish DNA sequence from clone DKEY-6A5 in linkage group 4 Contains the 3' end of the gene for a novel protein similar to vertebrate glutamate receptor interacting protein 1 (GRIP1) the gene for a novel protein similar to vertebrate transmembrane BAX inhibitor motif containing 4 (TMBIM4 zgc:64112) the gene for a novel protein similar to vertebrate integral inner nuclear membrane protein (MAN1)…	-1.101	0.002173	KRTAP10-10		KRTAP10-10	-1.101	keratin associated protein 10-10	Cytoplasm	other
	TC155103	AB529106	Synthetic construct DNA clone: pF1KB4569 Homo sapiens SVOP gene for SV2 related protein homolog without stop codon in Flexi system	-1.106	0.005023	SVOP		SVOP	-1.106	SV2 related protein	Cytoplasm	transporter
	TC132406	AF287490	Oncorhynchus mykiss MHC class I heavy chain precursor (Onmy-UBA) mRNA Onmy-UBA*503 allele complete cds	-1.107	0.02101	HLA-B		HLA-B	-1.107	major histocompatibility complex, class I, B	Plasma Membrane	cell surface receptor
	TC141055	not-annotated	not-annotated	-1.11	0.0084	BMI1		BMI1	-1.11	BMI1 proto-oncogene, polycomb ring finger	Nucleus	transcription regulator
	TC149252	NM_001139937	Salmo salar Ubiquitin-conjugating enzyme E2 R2 (ub2r2) mRNA_x0001_gb-BT044917.1- Salmo salar clone ssal-rgf-507-097 Ubiquitin-conjugating enzyme E2 R2 putative mRNA complete cds	-1.114	0.003602	UBE2R2		UBE2R2	-1.114	ubiquitin conjugating enzyme E2 R2	Cytoplasm	enzyme
	TC169460	BT073304	Oncorhynchus mykiss clone omyk-evn-504-177 DNA polymerase subunit delta 4 putative mRNA complete cds	-1.121	0.031027	POLD4		POLD4	-1.121	DNA polymerase delta 4, accessory subunit	Nucleus	enzyme
	TC144078	CR792439	Zebrafish DNA sequence from clone DKEYP-100A1 in linkage group 8 Contains the 3' end of the gene for a novel protein similar to vertebrate Rho guanine exchange factor (GEF) 16 (ARHGEF16) the ybx1 gene for Y box binding protein 1 the gene for a novel protein similar to vertebrate 510-methylenetetrahydrofolate reductase (NADPH) (MTHFR) the ppih gene for peptidylprolyl isomerase H (cyclophilin H) th…	-1.122	0.000155	ARHGEF16		ARHGEF16	-1.122	Rho guanine nucleotide exchange factor 16	Cytoplasm	other
	TC142459	not-annotated	not-annotated	-1.122	0.005161	UMOD		UMOD	-1.122	uromodulin	Extracellular Space	other
	TC160543	BC162582	Danio rerio DNA (cytosine-5-)-methyltransferase 6 mRNA (cDNA clone MGC:193836 IMAGE:9038105) complete cds	-1.123	0.048265	DNMT3A		DNMT3A	-1.123	DNA methyltransferase 3 alpha	Nucleus	enzyme
	TC147080	BT049679	Salmo salar clone ssal-evd-529-297 Anterior gradient protein 3 homolog precursor putative mRNA complete cds	-1.124	0.000292	AGR3		AGR3	-1.124	anterior gradient 3, protein disulphide isomerase family member	Extracellular Space	other
	TC133687	NM_001124742	Oncorhynchus mykiss cytochrome P450 2K5 (cyp2k5) mRNA_x0001_gb-AF151524.1-AF151524 Oncorhynchus mykiss cytochrome P450 2K5 (CYP2K5) mRNA complete cds	-1.124	0.034501	CYP2F1		CYP2F1	-1.124	cytochrome P450 family 2 subfamily F member 1	Cytoplasm	enzyme
	TC158563	CR751608	Zebrafish DNA sequence from clone DKEY-41E15 in linkage group 12 complete sequence	-1.126	0.000172	ALDH18A1		ALDH18A1	-1.126	aldehyde dehydrogenase 18 family member A1	Cytoplasm	kinase
	TC165364	HQ287745	Coregonus clupeaformis putative liver carboxylesterase 22 precursor (CE) gene partial cds	-1.127	0.007954	PM20D2		PM20D2	-1.127	peptidase M20 domain containing 2	Nucleus	peptidase
	TC151090	not-annotated	not-annotated	-1.127	0.010665	RNF212		RNF212	-1.127	ring finger protein 212	Nucleus	enzyme
	TC157270	BT072559	Salmo salar clone ssal-rgf-530-160 Cellular tumor antigen p53 putative mRNA partial cds	-1.127	0.000969	TP63		TP63	-1.127	tumor protein p63	Nucleus	transcription regulator
	TC149511	NM_200617	Danio rerio arginyl-tRNA synthetase 2 mitochondrial (putative) (rars2) nuclear gene encoding mitochondrial protein mRNA_x0001_gb-BC056803.1- Danio rerio arginyl-tRNA synthetase 2 mitochondrial (putative) mRNA (cDNA clone MGC:63702 IMAGE:2600311) complete cds	-1.13	0.006538	RARS2		RARS2	-1.13	arginyl-tRNA synthetase 2, mitochondrial	Cytoplasm	enzyme
	TC161156	DQ858215	Danio rerio sestrin 1 (sesn1) mRNA complete cds	-1.13	0.000525	SESN1		SESN1	-1.13	sestrin 1	Nucleus	other
	TC151293	AY550521	Salmo salar clone Hae441 microsatellite sequence	-1.135	0.000502	NBN		NBN	-1.135	nibrin	Nucleus	other
	TC163018	BT058868	Salmo salar clone ssal-rgf-509-059 TAR DNA-binding protein 43 putative mRNA complete cds	-1.137	0.034261	TARDBP		TARDBP	-1.137	TAR DNA binding protein	Nucleus	transcription regulator
	TC133627	AB081832	Pagrus major PC mRNA for pyruvate carboxylase partial cds	-1.14	0.002312	PC		PC	-1.14	pyruvate carboxylase	Cytoplasm	enzyme
	TC148609	not-annotated	not-annotated	-1.142	0.000344	DTX3L		DTX3L	-1.142	deltex E3 ubiquitin ligase 3L	Cytoplasm	enzyme
	TC138100	NM_001173906	Salmo salar Probable O-sialoglycoprotein endopeptidase (gcp) mRNA_x0001_gb-BT060292.1- Salmo salar clone ssal-rgh-512-303 Probable O-sialoglycoprotein endopeptidase putative mRNA complete cds	-1.145	0.001647	OSGEP		OSGEP	-1.145	O-sialoglycoprotein endopeptidase	Nucleus	peptidase
	TC142440	BT045571	Salmo salar clone ssal-rgf-525-069 ADP-ribosylation factor-like protein 9 putative mRNA complete cds	-1.148	0.004568	ARL9		ARL9	-1.148	ADP ribosylation factor like GTPase 9	Other	other
	TC160665	BT072714	Salmo salar clone ssal-rgf-537-266 unknown large open reading frame mRNA novel cds	-1.148	0.000211	C7orf57		C7orf57	-1.148	chromosome 7 open reading frame 57	Other	other
	TC156028	NM_001140147	Salmo salar methylthioadenosine phosphorylase (mtap) mRNA_x0001_gb-BT045324.1- Salmo salar clone ssal-rgf-518-163 S-methyl-5-thioadenosine phosphorylase putative mRNA complete cds	-1.149	9.1e-05	MTAP		MTAP	-1.149	methylthioadenosine phosphorylase	Nucleus	enzyme
	TC141799	not-annotated	not-annotated	-1.152	0.000397	GOLGA6L6		GOLGA6L6 (includes others)	-1.152	golgin A6 family like 6	Other	other
	TC167122	BT050305	Salmo salar clone ssal-rgb2-584-112 Flavin reductase putative mRNA complete cds	-1.159	0.000519	BLVRB		BLVRB	-1.159	biliverdin reductase B	Cytoplasm	enzyme
	TC134063	BT073109	Oncorhynchus mykiss clone omyk-evn-505-102 Hypothetical 18.4 kDa protein in SIS2-MTD1 intergenic region putative mRNA complete cds	-1.159	0.00017	C2orf76		C2orf76	-1.159	chromosome 2 open reading frame 76	Other	other
	TC143805	NM_001140913	Salmo salar Periphilin-1 (pphln) mRNA_x0001_gb-BT047503.1- Salmo salar clone ssal-evf-525-375 Periphilin-1 putative mRNA complete cds	-1.161	0.00018	PPHLN1		PPHLN1	-1.161	periphilin 1	Nucleus	other
	TC136011	FQ310507	Dicentrarchus labrax chromosome sequence corresponding to linkage group 1 bottom part complete sequence	-1.162	0.004328	FAM109A		PHETA1	-1.162	PH domain containing endocytic trafficking adaptor 1	Cytoplasm	other
	TC170138	BT072702	Salmo salar clone ssal-rgf-537-106 Rhesus blood group-associated glycoprotein putative mRNA pseudogene cds	-1.166	0.000191	RHAG		RHAG	-1.166	Rh associated glycoprotein	Plasma Membrane	peptidase
	TC163613	BT045471	Salmo salar clone ssal-rgf-522-152 TPR repeat-containing protein LOC90826 putative mRNA complete cds	-1.171	0.015486	PRMT10		PRMT9	-1.171	protein arginine methyltransferase 9	Cytoplasm	enzyme
	TC132995	BT048743	Salmo salar clone ssal-evf-554-032 Tetratricopeptide repeat protein 9C putative mRNA complete cds	-1.172	0.013979	TTC9C		TTC9C	-1.172	tetratricopeptide repeat domain 9C	Other	other
	TC162147	BT079133	Esox lucius clone eluc-evq-506-305 Chloride intracellular channel protein 4 putative mRNA complete cds	-1.175	0.007969	CLIC4		CLIC4	-1.175	chloride intracellular channel 4	Plasma Membrane	ion channel
	TC157986	BT056544	Salmo salar clone ssal-rgb2-654-361 Lipopolysaccharide-induced tumor necrosis factor-alpha factor homolog putative mRNA complete cds	-1.176	0.004922	LITAF		LITAF	-1.176	lipopolysaccharide induced TNF factor	Nucleus	transcription regulator
	TC158407	NM_001140863	Salmo salar kaptin (actin binding protein) (kptn) mRNA_x0001_gb-BT047308.1- Salmo salar clone ssal-rgb2-601-012 Kaptin putative mRNA complete cds	-1.183	0.016974	KPTN		KPTN	-1.183	kaptin, actin binding protein	Plasma Membrane	other
	TC137732	NM_001140063	Salmo salar Kunitz-type protease inhibitor 2 (spit2) mRNA_x0001_gb-BT045164.1- Salmo salar clone ssal-rgf-513-356 Kunitz-type protease inhibitor 2 precursor putative mRNA complete cds	-1.183	0.00498	TFPI2		TFPI2	-1.183	tissue factor pathway inhibitor 2	Extracellular Space	other
	TC168346	BT059323	Salmo salar clone ssal-rgf-541-170 DNA polymerase subunit delta-2 putative mRNA complete cds	-1.184	0.017499	POLD2		POLD2	-1.184	DNA polymerase delta 2, accessory subunit	Nucleus	enzyme
	TC167246	GU588088	Ictalurus furcatus clone CBZC5717 elongation of very long chain fatty acids protein 7 (ELOV7) mRNA complete cds	-1.185	0.007606	ELOVL7		ELOVL7	-1.185	ELOVL fatty acid elongase 7	Cytoplasm	enzyme
	TC170445	NM_001173856	Salmo salar neural proliferation differentiation and control 1 (npdc1) mRNA_x0001_gb-BT059655.1- Salmo salar clone ssal-rgf-502-270 Neural proliferation differentiation and control protein 1 precursor putative mRNA complete cds	-1.192	0.018112	NPDC1		NPDC1	-1.192	neural proliferation, differentiation and control 1	Extracellular Space	other
	TC150533	AF278537	Alcolapia grahami urea transporter (UT) mRNA complete cds	-1.192	0.000317	SLC14A2		SLC14A2	-1.192	solute carrier family 14 member 2	Plasma Membrane	transporter
	TC166486	XM_683292	PREDICTED: Danio rerio wu:fe11c03 transcript variant 1 (wu:fe11c03) mRNA	-1.198	0.010695	GRAMD1C		GRAMD1C	-1.198	GRAM domain containing 1C	Other	other
	TC141554	NM_001195412	Oncorhynchus mykiss DEC-205/CD205 (ly75) mRNA_x0001_gb-GQ468309.1- Oncorhynchus mykiss DEC-205/CD205 protein mRNA complete cds	-1.2	0.047322	LY75		LY75	-1.2	lymphocyte antigen 75	Plasma Membrane	cell surface receptor
	TC163013	NM_001141703	Salmo salar pyruvate kinase (pk) mRNA_x0001_gb-BT043851.1- Salmo salar clone HM4_3957 pyruvate kinase (pk) mRNA complete cds	-1.2	0.036648	PKM2		PKM	-1.2	pyruvate kinase M1/2	Cytoplasm	kinase
	TC161914	BT080043	Esox lucius clone eluc-evq-506-207 DNA fragmentation factor subunit beta putative mRNA complete cds	-1.201	0.025796	DFFB		DFFB	-1.201	DNA fragmentation factor subunit beta	Nucleus	enzyme
	TC145092	NM_001146373	Salmo salar Vesicle transport protein SFT2B (sft2b) mRNA_x0001_gb-BT056433.1- Salmo salar clone ssal-eve-503-347 Vesicle transport protein SFT2B putative mRNA complete cds	-1.205	0.000461	SFT2D2		SFT2D2	-1.205	SFT2 domain containing 2	Cytoplasm	other
	TC171255	BT058857	Salmo salar clone ssal-rgf-508-050 60S ribosomal protein L17 putative mRNA complete cds	-1.207	0.048138	EXOC1		EXOC1	-1.207	exocyst complex component 1	Cytoplasm	transporter
	TC138770	not-annotated	not-annotated	-1.209	0.019378	PNKP		PNKP	-1.209	polynucleotide kinase 3'-phosphatase	Nucleus	kinase
	TC168475	AC145765	Gasterosteus aculeatus clone CH213-7I21 complete sequence	-1.217	5.1e-05	POF1B		POF1B	-1.217	POF1B actin binding protein	Plasma Membrane	other
	TC157655	NM_001140760	Salmo salar cleavage and polyadenylation factor subunit homolog (S. cerevisiae) (pcf11) mRNA_x0001_gb-BT046915.2- Salmo salar clone ssal-rgb2-633-070 Pre-mRNA cleavage complex 2 protein Pcf11 putative mRNA complete cds	-1.219	0.000143	PCF11		PCF11	-1.219	PCF11 cleavage and polyadenylation factor subunit	Nucleus	other
	TC146157	NM_001165353	Salmo salar acyl-Coenzyme A oxidase 3 pristanoyl (acox3) mRNA_x0001_gb-BT058841.1- Salmo salar clone ssal-rgf-506-253 Acyl-coenzyme A oxidase 3 peroxisomal putative mRNA complete cds	-1.222	0.011132	ACOX3		ACOX3	-1.222	acyl-CoA oxidase 3, pristanoyl	Cytoplasm	enzyme
	TC143117	NM_001173910	Salmo salar glutathione S-transferase C-terminal domain containing (gstcd) mRNA_x0001_gb-BT058752.1- Salmo salar clone ssal-rgf-501-102 Glutathione S-transferase C-terminal domain-containing protein putative mRNA complete cds	-1.228	0.040827	GSTCD		GSTCD	-1.228	glutathione S-transferase C-terminal domain containing	Cytoplasm	enzyme
	TC166499	BT072345	Salmo salar clone ssal-rgf-522-072 Peroxisomal membrane protein PMP34 putative mRNA pseudogene cds	-1.228	0.000156	SLC25A17		SLC25A17	-1.228	solute carrier family 25 member 17	Cytoplasm	transporter
	TC162090	not-annotated	not-annotated	-1.233	0.000492	C4orf40		PRR27	-1.233	proline rich 27	Cytoplasm	other
	TC158561	BT075538	Osmerus mordax clone omor-rgc-518-270 Cell division protein kinase 4 putative mRNA complete cds	-1.236	0.002157	CDK4		CDK4	-1.236	cyclin dependent kinase 4	Nucleus	kinase
	TC160106	BT059156	Salmo salar clone ssal-rgf-528-294 Tubulin alpha chain putative mRNA complete cds	-1.236	0.001853	TUBA1A		TUBA1A	-1.236	tubulin alpha 1a	Cytoplasm	other
	TC162740	NM_001173782	Salmo salar Dynein light chain 4 axonemal (dnal4) mRNA_x0001_gb-BT059494.1- Salmo salar clone ssal-rgf-516-203 Dynein light chain 4 axonemal putative mRNA complete cds	-1.238	0.012768	DNAL4		DNAL4	-1.238	dynein axonemal light chain 4	Cytoplasm	enzyme
	TC167077	not-annotated	not-annotated	-1.241	0.00082	IFI44L		IFI44L	-1.241	interferon induced protein 44 like	Nucleus	other
	TC171179	BT045602	Salmo salar clone ssal-rgf-526-084 Pyridoxal kinase putative mRNA complete cds	-1.241	0.019783	PDXK		PDXK	-1.241	pyridoxal kinase	Cytoplasm	kinase
	TC155948	NM_001140515	Salmo salar G1/S-specific cyclin-D2 (ccnd2) mRNA_x0001_gb-BT046005.1- Salmo salar clone ssal-rgf-538-368 G1/S-specific cyclin-D2 putative mRNA complete cds	-1.243	6.9e-05	CCND2		CCND2	-1.243	cyclin D2	Nucleus	other
	TC144532	BT046327	Salmo salar clone ssal-evf-540-135 Cytochrome c oxidase subunit 7C mitochondrial precursor putative mRNA complete cds	-1.245	0.007254	COX7C		COX7C	-1.245	cytochrome c oxidase subunit 7C	Cytoplasm	enzyme
	TC162546	BC165844	Danio rerio abhydrolase domain containing 2b mRNA (cDNA clone MGC:192932 IMAGE:100061418) complete cds	-1.248	0.04621	ABHD2		ABHD2	-1.248	abhydrolase domain containing 2, acylglycerol lipase	Cytoplasm	enzyme
	TC160471	NM_001139844	Salmo salar bone morphogenetic protein 4 (bmp4) mRNA_x0001_gb-BT044754.1- Salmo salar clone ssal-rgf-502-254 Bone morphogenetic protein 4 precursor putative mRNA complete cds	-1.249	0.001542	BMP4		BMP4	-1.249	bone morphogenetic protein 4	Extracellular Space	growth factor
	TC163310	XM_686358	PREDICTED: Danio rerio DEP domain containing 5 (depdc5) mRNA	-1.25	0.000809	DEPDC5		DEPDC5	-1.25	DEP domain containing 5, GATOR1 subcomplex subunit	Cytoplasm	other
	TC147828	not-annotated	not-annotated	-1.25	0.024934	ZP3		ZP3	-1.25	zona pellucida glycoprotein 3	Extracellular Space	other
	TC133840	BT045961	Salmo salar clone ssal-rgf-537-288 Succinate-semialdehyde dehydrogenase mitochondrial precursor putative mRNA complete cds	-1.251	8.3e-05	ALDH5A1		ALDH5A1	-1.251	aldehyde dehydrogenase 5 family member A1	Cytoplasm	enzyme
	TC138127	BC153514	Danio rerio zgc:162327 mRNA (cDNA clone MGC:174187 IMAGE:8770825) complete cds	-1.251	0.003574	PNPLA4		PNPLA4	-1.251	patatin like phospholipase domain containing 4	Cytoplasm	enzyme
	TC137872	XM_003273170	PREDICTED: Nomascus leucogenys NUAK family SNF1-like kinase 2 (NUAK2) mRNA	-1.252	0.027094	NUAK2		NUAK2	-1.252	NUAK family kinase 2	Nucleus	kinase
	TC147037	BT059180	Salmo salar clone ssal-rgf-530-370 Cleavage and polyadenylation specificity factor subunit 2 putative mRNA complete cds	-1.253	0.012834	CPSF2		CPSF2	-1.253	cleavage and polyadenylation specific factor 2	Nucleus	other
	TC133740	BT027629	Gasterosteus aculeatus clone CGX68-A06 mRNA sequence	-1.254	0.00605	OBFC1		STN1	-1.254	STN1 subunit of CST complex	Nucleus	other
	TC167390	DQ156150	Salmo salar BAC S0188I22 partial sequence	-1.257	0.031562	DLL3		DLL3	-1.257	delta like canonical Notch ligand 3	Extracellular Space	other
	TC132494	XM_687605	PREDICTED: Danio rerio phosphoinositide-3-kinase catalytic gamma polypeptide (pik3cg) mRNA	-1.26	0.001465	PIK3CG		PIK3CG	-1.26	phosphatidylinositol-4,5-bisphosphate 3-kinase catalytic subunit gamma	Cytoplasm	kinase
	TC145514	not-annotated	not-annotated	-1.268	0.011428	TMEM218		TMEM218	-1.268	transmembrane protein 218	Extracellular Space	other
	TC137940	NM_001140206	Salmo salar Cathepsin F (catf) mRNA_x0001_gb-BT045424.1- Salmo salar clone ssal-rgf-521-028 Cathepsin F precursor putative mRNA complete cds	-1.273	0.043932	CTSF		CTSF	-1.273	cathepsin F	Cytoplasm	peptidase
	TC166552	not-annotated	not-annotated	-1.274	0.00418	MPST		MPST	-1.274	mercaptopyruvate sulfurtransferase	Cytoplasm	enzyme
	TC139046	BT044891	Salmo salar clone ssal-rgf-506-281 Phosphoinositide-3-kinase-interacting protein 1 precursor putative mRNA complete cds	-1.278	0.005625	PIK3IP1		PIK3IP1	-1.278	phosphoinositide-3-kinase interacting protein 1	Cytoplasm	other
	TC155300	NM_001165336	Salmo salar E3 ubiquitin-protein ligase RNF34 (rnf34) mRNA_x0001_gb-BT058801.1- Salmo salar clone ssal-rgf-503-362 E3 ubiquitin-protein ligase RNF34 putative mRNA complete cds	-1.278	0.000359	RNF34		RNF34	-1.278	ring finger protein 34	Cytoplasm	enzyme
	TC134420	not-annotated	not-annotated	-1.281	4e-05	ARHGAP12		ARHGAP12	-1.281	Rho GTPase activating protein 12	Cytoplasm	other
	TC157993	NM_001140591	Salmo salar Cathepsin O (cato) mRNA_x0001_gb-BT046291.1- Salmo salar clone ssal-evf-555-225 Cathepsin O precursor putative mRNA complete cds	-1.281	0.023769	CTSO		CTSO	-1.281	cathepsin O	Cytoplasm	peptidase
	TC171241	NM_001165360	Salmo salar cancer susceptibility candidate 4 (casc4) mRNA_x0001_gb-BT058862.1- Salmo salar clone ssal-rgf-508-303 CASC4 putative mRNA complete cds	-1.287	0.000184	CASC4		GOLM2	-1.287	golgi membrane protein 2	Cytoplasm	other
	TC143681	BT056553	Salmo salar clone ssal-eve-502-289 C-X-C motif chemokine 14 precursor putative mRNA complete cds	-1.294	3.3e-05	CXCL14		CXCL14	-1.294	C-X-C motif chemokine ligand 14	Extracellular Space	cytokine
	TC144946	BT072769	Salmo salar clone ssal-rgf-539-342 Histone-lysine N-methyltransferase H3 lysine-9 specific 3 putative mRNA partial cds	-1.295	3.1e-05	EHMT2		EHMT2	-1.295	euchromatic histone lysine methyltransferase 2	Nucleus	transcription regulator
	TC157950	BT045627	Salmo salar clone ssal-rgf-526-376 Arrestin domain-containing protein 2 putative mRNA complete cds	-1.299	0.001213	ARRDC2		ARRDC2	-1.299	arrestin domain containing 2	Other	other
	TC163790	BC165458	Danio rerio fumarylacetoacetate hydrolase (fumarylacetoacetase) mRNA (cDNA clone MGC:192546 IMAGE:100061002) complete cds	-1.304	0.02168	FAH		FAH	-1.304	fumarylacetoacetate hydrolase	Cytoplasm	enzyme
	TC161448	not-annotated	not-annotated	-1.317	0.043705	EOMES		EOMES	-1.317	eomesodermin	Nucleus	transcription regulator
	TC156545	BC071528	Danio rerio general transcription factor IIA 1 mRNA (cDNA clone MGC:86907 IMAGE:6905511) complete cds	-1.317	0.020687	GTF2A1		GTF2A1	-1.317	general transcription factor IIA subunit 1	Cytoplasm	transcription regulator
	TC137773	CR649330	Tetraodon nigroviridis full-length cDNA	-1.32	0.001152	FAXDC2		FAXDC2	-1.32	fatty acid hydroxylase domain containing 2	Cytoplasm	other
	TC166562	NM_001141363	Salmo salar 6-pyruvoyl tetrahydropterin synthase (ptps) mRNA_x0001_gb-BT049287.1- Salmo salar clone ssal-eve-574-046 6-pyruvoyl tetrahydrobiopterin synthase putative mRNA complete cds	-1.321	0.006373	PTS		PTS	-1.321	6-pyruvoyltetrahydropterin synthase	Cytoplasm	enzyme
	TC138349	BT074755	Osmerus mordax clone omor-rgc-515-163 Beta-13-galactosyltransferase 2 putative mRNA complete cds	-1.323	0.000426	B3GALT2		B3GALT2	-1.323	beta-1,3-galactosyltransferase 2	Cytoplasm	enzyme
	TC165617	BT059094	Salmo salar clone ssal-rgf-525-073 ATP-dependent Clp protease ATP-binding subunit clpX-like mitochondrial precursor putative mRNA complete cds	-1.325	0.006016	CLPX		CLPX	-1.325	caseinolytic mitochondrial matrix peptidase chaperone subunit X	Cytoplasm	enzyme
	TC146641	FQ310506	Dicentrarchus labrax chromosome sequence corresponding to linkage group 1 top part complete sequence	-1.328	0.035145	MSX1		MSX1	-1.328	msh homeobox 1	Nucleus	transcription regulator
	IMM 185	XM_002189643	PREDICTED: Taeniopygia guttata similar to fibronectin 1 isoform 1 preproprotein (LOC100231676) partial mRNA	-1.334	0.033496	FN1		FN1	-1.334	fibronectin 1	Extracellular Space	enzyme
	TC152972	BT044697	Salmo salar clone ssal-rgf-501-026 Agmatinase mitochondrial precursor putative mRNA complete cds	-1.336	0.008743	AGMAT		AGMAT	-1.336	agmatinase	Cytoplasm	enzyme
	TC171883	not-annotated	not-annotated	-1.348	0.003992	RGAG1		RTL9	-1.348	retrotransposon Gag like 9	Other	other
	TC161903	BT074748	Osmerus mordax clone omor-eva-503-377 Argininosuccinate lyase putative mRNA complete cds	-1.36	0.000176	ASL		ASL	-1.36	argininosuccinate lyase	Cytoplasm	enzyme
	TC160904	not-annotated	not-annotated	-1.361	0.000287	ZNF185		ZNF185	-1.361	zinc finger protein 185 with LIM domain	Plasma Membrane	other
	TC142481	BT059520	Salmo salar clone ssal-rgf-530-020 C20orf77 putative mRNA complete cds	-1.366	0.006828	RPRD1B		RPRD1B	-1.366	regulation of nuclear pre-mRNA domain containing 1B	Nucleus	other
	TC169600	not-annotated	not-annotated	-1.367	0.003618	SSC5D		SSC5D	-1.367	scavenger receptor cysteine rich family member with 5 domains	Plasma Membrane	cell surface receptor
	TC139095	NM_001146648	Salmo salar Zinc finger protein 391 (zn391) mRNA_x0001_gb-BT056386.1- Salmo salar clone ssal-eve-563-079 Zinc finger protein 391 putative mRNA complete cds	-1.369	0.00085	ZNF135		ZNF135	-1.369	zinc finger protein 135	Nucleus	transcription regulator
	TC140624	NM_001173599	Salmo salar lon peptidase 2 peroxisomal (lonp2) mRNA_x0001_gb-BT059019.1- Salmo salar clone ssal-rgf-520-244 Peroxisomal Lon protease homolog 2 putative mRNA complete cds	-1.371	4.9e-05	LONP2		LONP2	-1.371	lon peptidase 2, peroxisomal	Cytoplasm	peptidase
	TC163043	not-annotated	not-annotated	-1.372	0.00063	GEMIN4		GEMIN4	-1.372	gem nuclear organelle associated protein 4	Nucleus	other
	TC156582	NM_001124542	Oncorhynchus mykiss LCK2 (LOC100136288) mRNA_x0001_gb-AY973033.1- Oncorhynchus mykiss LCK2 mRNA complete cds	-1.375	0.036484	LCK		LCK	-1.375	LCK proto-oncogene, Src family tyrosine kinase	Cytoplasm	kinase
	TC132851	BT059582	Salmo salar clone ssal-rgf-516-281 BCL2/adenovirus E1B 19 kDa protein-interacting protein 3 putative mRNA complete cds	-1.377	0.000533	BNIP3		BNIP3	-1.377	BCL2 interacting protein 3	Cytoplasm	other
	TC141988	NM_001173787	Salmo salar ubiquitin-like 7 (ubl7) mRNA_x0001_gb-BT059505.1- Salmo salar clone ssal-rgf-529-157 Ubiquitin-like protein 7 putative mRNA complete cds	-1.377	0.002553	UBL7		UBL7	-1.377	ubiquitin like 7	Other	other
	TC140735	CR702934	Tetraodon nigroviridis full-length cDNA	-1.385	9.7e-05	ARL4A		ARL4A	-1.385	ADP ribosylation factor like GTPase 4A	Nucleus	enzyme
	TC156219	BT059305	Salmo salar clone ssal-rgf-540-102 Guanine nucleotide-binding protein subunit beta-2-like 1 putative mRNA complete cds	-1.388	0.002792	GNB2L1		RACK1	-1.388	receptor for activated C kinase 1	Cytoplasm	enzyme
	TC156621	BT072253	Salmo salar clone ssal-rgf-518-260 FAM134A putative mRNA partial cds	-1.39	0.003963	FAM134A		RETREG2	-1.39	reticulophagy regulator family member 2	Other	other
	TC169944	HM159473	Salmo salar clone BAC 19C14 DOT1-like histone H3 methyltransferase pseudogene complete sequence; anti-mullerian hormone gene complete cds; ornithine decarboxylase antizyme 1 pseudogene complete sequence; oogenesis-related protein gene complete cds; and nuclear factor interleukin 3 regulated pseudogene complete sequence	-1.39	7.8e-05	MOSPD2		MOSPD2	-1.39	motile sperm domain containing 2	Plasma Membrane	other
	TC142436	BT079738	Esox lucius clone eluc-evq-533-150 Serine protease 27 precursor putative mRNA complete cds	-1.39	0.002061	PRSS27		PRSS27	-1.39	serine protease 27	Extracellular Space	peptidase
	TC168392	BT026945	Gasterosteus aculeatus clone CFW111-H12 mRNA sequence	-1.403	0.041843	NUP35		NUP35	-1.403	nucleoporin 35	Nucleus	transporter
	TC152575	AY810659	Schistosoma japonicum SJCHGC07628 protein mRNA partial cds	-1.417	0.017745	ZNF146		ZNF146	-1.417	zinc finger protein 146	Nucleus	transcription regulator
	TC149668	BT028525	Gasterosteus aculeatus clone CNB236-F11 mRNA sequence	-1.419	1.3e-05	ANKH		ANKH	-1.419	ANKH inorganic pyrophosphate transport regulator	Plasma Membrane	transporter
	TC138550	NM_001140786	Salmo salar FAM100A (f100a) mRNA_x0001_gb-BT047017.2- Salmo salar clone ssal-plnb-025-113 FAM100A putative mRNA complete cds	-1.419	0.000153	UBALD1		UBALD1	-1.419	UBA like domain containing 1	Other	other
	TC155408	BT059324	Salmo salar clone ssal-rgf-541-174 DNA replication licensing factor mcm5 putative mRNA complete cds	-1.422	0.000463	MCM5		MCM5	-1.422	minichromosome maintenance complex component 5	Nucleus	enzyme
	IMM 596	NM_001124744	Oncorhynchus mykiss membrane-Toll-like receptor 5 (tlr5m) mRNA_x0001_dbj-AB091105.1- Oncorhynchus mykiss tTLR5 mRNA for membrane-Toll-like receptor 5 complete cds	-1.427	0.046598	TLR5		TLR5	-1.427	toll like receptor 5	Plasma Membrane	cell surface receptor
	TC155714	not-annotated	not-annotated	-1.432	0.013911	KIAA1731		CEP295	-1.432	centrosomal protein 295	Cytoplasm	other
	TC169695	NM_001124628	Oncorhynchus mykiss beta-3a-adrenergic receptor (LOC100136655) mRNA_x0001_gb-AY216465.1- Oncorhynchus mykiss beta-3a-adrenergic receptor mRNA complete cds	-1.434	0.000162	ADRB1		ADRB1	-1.434	adrenoceptor beta 1	Plasma Membrane	G-protein coupled receptor
	TC147492	not-annotated	not-annotated	-1.438	4.9e-05	GPR111		ADGRF2	-1.438	adhesion G protein-coupled receptor F2	Plasma Membrane	G-protein coupled receptor
	TC168823	not-annotated	not-annotated	-1.447	0.025744	BBX		BBX	-1.447	BBX high mobility group box domain containing	Nucleus	transcription regulator
	TC156492	BT074943	Osmerus mordax clone omor-eva-512-018 Vesicle transport protein SEC20 putative mRNA complete cds	-1.454	0.037656	BNIP1		BNIP1	-1.454	BCL2 interacting protein 1	Cytoplasm	transporter
	TC172152	NM_001045034	Danio rerio K(lysine) acetyltransferase 2B (kat2b) mRNA	-1.455	0.046963	KAT2B		KAT2B	-1.455	lysine acetyltransferase 2B	Nucleus	transcription regulator
	TC141023	NM_001140436	Salmo salar Friend leukemia integration 1 transcription factor (fli1) mRNA_x0001_gb-BT045859.1- Salmo salar clone ssal-rgf-534-383 Friend leukemia integration 1 transcription factor putative mRNA complete cds	-1.459	0.033722	FLI1		FLI1	-1.459	Fli-1 proto-oncogene, ETS transcription factor	Nucleus	transcription regulator
	TC169169	not-annotated	not-annotated	-1.46	0.040923	POLR3E		POLR3E	-1.46	RNA polymerase III subunit E	Nucleus	transcription regulator
	TC151098	GQ505860	Salmo salar clone BAC CHORI214-68O19 genomic sequence	-1.467	0.002824	PEX1		PEX1	-1.467	peroxisomal biogenesis factor 1	Cytoplasm	enzyme
	TC143458	NM_001141054	Salmo salar IMM ature colon carcinoma transcript 1 protein (ict1) mRNA_x0001_gb-BT048091.1- Salmo salar clone ssal-eve-576-214 IMM ature colon carcinoma transcript 1 protein precursor putative mRNA complete cds	-1.468	0.029971	ICT1		MRPL58	-1.468	mitochondrial ribosomal protein L58	Cytoplasm	enzyme
	TC166160	BT072010	Salmo salar clone ssal-rgf-507-170 Talin-1 putative mRNA partial cds	-1.469	0.010851	TLN2		TLN2	-1.469	talin 2	Nucleus	other
	TC140743	not-annotated	not-annotated	-1.472	0.016418	UMODL1		UMODL1	-1.472	uromodulin like 1	Cytoplasm	other
	TC163539	NM_001145554	Danio rerio zgc:123010 (zgc:123010) mRNA	-1.488	0.045706	TTC31		TTC31	-1.488	tetratricopeptide repeat domain 31	Other	other
	TC144657	CR653460	Tetraodon nigroviridis full-length cDNA	-1.49	1.2e-05	MYLK		MYLK	-1.49	myosin light chain kinase	Cytoplasm	kinase
	TC152286	not-annotated	not-annotated	-1.496	0.015976	LRRC49		LRRC49	-1.496	leucine rich repeat containing 49	Cytoplasm	other
	TC133939	FJ842647	Rachycentron canadum clone 1 fatty acid synthase (FAS) mRNA partial cds	-1.515	0.012638	FASN		FASN	-1.515	fatty acid synthase	Cytoplasm	enzyme
	TC135408	BT072077	Salmo salar clone ssal-rgf-510-219 kinase C eta type putative mRNA partial cds	-1.516	2.5e-05	PRKCH		PRKCH	-1.516	protein kinase C eta	Cytoplasm	kinase
	TC162021	NM_001141569	Salmo salar Kunitz-type protease inhibitor 1 (spit1) mRNA_x0001_gb-BT050172.1- Salmo salar clone ssal-eve-516-200 Kunitz-type protease inhibitor 1 precursor putative mRNA complete cds	-1.519	0.007547	SPINT1		SPINT1	-1.519	serine peptidase inhibitor, Kunitz type 1	Extracellular Space	other
	TC132543	AF318188	Oncorhynchus mykiss MHC class I heavy chain (Onmy-UBA) mRNA Onmy-UBA*4801 allele partial cds	-1.52	0.011859	HLA-C		HLA-C	-1.52	major histocompatibility complex, class I, C	Plasma Membrane	other
	TC164137	BT072088	Salmo salar clone ssal-rgf-511-021 Gelsolin precursor putative mRNA partial cds	-1.52	0.001081	SCIN		SCIN	-1.52	scinderin	Cytoplasm	other
	TC169932	BT071863	Salmo salar clone ssal-rgf-501-037 C17orf37 homolog putative mRNA pseudogene cds	-1.526	0.000213	MIEN1		MIEN1	-1.526	migration and invasion enhancer 1	Cytoplasm	other
	TC137675	NM_001146598	Salmo salar U6 snRNA-associated Sm-like protein LSm2 (lsm2) mRNA_x0001_gb-BT057625.1- Salmo salar clone ssal-plnb-027-076 U6 snRNA-associated Sm-like protein LSm2 putative mRNA complete cds	-1.527	0.04848	LSM2		LSM2	-1.527	LSM2 homolog, U6 small nuclear RNA and mRNA degradation associated	Nucleus	other
	TC171113	NM_001173709	Salmo salar ADP-ribosylation factor-like 15 (arl15) mRNA_x0001_gb-BT059299.1- Salmo salar clone ssal-rgf-540-027 ADP-ribosylation factor-like protein 15 putative mRNA complete cds	-1.528	0.000108	ARL15		ARL15	-1.528	ADP ribosylation factor like GTPase 15	Cytoplasm	other
	TC161681	BT047331	Salmo salar clone ssal-eve-501-132 Butyrophilin subfamily 1 member A1 precursor putative mRNA complete cds	-1.538	0.00386	BTN2A1		BTN2A1	-1.538	butyrophilin subfamily 2 member A1	Plasma Membrane	other
	TC160142	NM_001123298	Danio rerio gamma-glutamyltransferase 5 (ggt5) mRNA	-1.539	0.002341	GGT5		GGT5	-1.539	gamma-glutamyltransferase 5	Plasma Membrane	enzyme
	TC164163	BT072033	Salmo salar clone ssal-rgf-508-116 Conserved oligomeric Golgi complex component 7 putative mRNA pseudogene cds	-1.55	0.036734	COG7		COG7	-1.55	component of oligomeric golgi complex 7	Cytoplasm	transporter
	TC169927	NM_001165349	Salmo salar Microtubule-associated protein tau (tau) mRNA_x0001_gb-BT058827.1- Salmo salar clone ssal-rgf-505-335 Microtubule-associated protein tau putative mRNA complete cds	-1.572	0.004097	MAPT		MAPT	-1.572	microtubule associated protein tau	Plasma Membrane	other
	TC148500	not-annotated	not-annotated	-1.585	2.5e-05	NTF4		NTF4	-1.585	neurotrophin 4	Extracellular Space	growth factor
	TC149100	NM_001124662	Oncorhynchus mykiss Rhesus blood group family type B glycoprotein (rhgb) mRNA_x0001_gb-EF051113.1- Oncorhynchus mykiss RhBGa mRNA complete cds	-1.596	1.3e-05	RHBG		RHBG	-1.596	Rh family B glycoprotein (gene/pseudogene)	Plasma Membrane	transporter
	TC148847	BC163719	Danio rerio transient receptor potential cation channel subfamily M member 7 mRNA (cDNA clone MGC:194798 IMAGE:9038782) complete cds	-1.603	0.03049	TRPM7		TRPM7	-1.603	transient receptor potential cation channel subfamily M member 7	Plasma Membrane	kinase
	TC162695	NM_001003634	Danio rerio formin binding protein 1-like (fnbp1l) mRNA_x0001_gb-BC077109.1- Danio rerio formin binding protein 1-like mRNA (cDNA clone MGC:100923 IMAGE:7145379) complete cds	-1.604	0.002722	FNBP1L		FNBP1L	-1.604	formin binding protein 1 like	Cytoplasm	other
	TC163655	NM_001160482	Oncorhynchus mykiss putative sodium hydrogen exchanger 3b (nhe3b) mRNA_x0001_gb-FJ376630.1- Oncorhynchus mykiss putative sodium hydrogen exchanger 3b (NHE3b) mRNA complete cds	-1.607	0.046257	SLC9A3		SLC9A3	-1.607	solute carrier family 9 member A3	Plasma Membrane	ion channel
	TC156700	not-annotated	not-annotated	-1.61	0.001776	MUC2		MUC2	-1.61	mucin 2, oligomeric mucus/gel-forming	Extracellular Space	other
	TC155331	not-annotated	not-annotated	-1.618	0.012003	FCRL6		FCRL6	-1.618	Fc receptor like 6	Plasma Membrane	other
	TC169497	CR933672	Homo sapiens mRNA; cDNA DKFZp781N0678 (from clone DKFZp781N0678)	-1.63	0.026469	IMPDH1		IMPDH1	-1.63	inosine monophosphate dehydrogenase 1	Cytoplasm	enzyme
	TC153196	BT072244	Salmo salar clone ssal-rgf-518-098 Polymerase delta-interacting protein 3 putative mRNA partial cds	-1.63	0.021171	POLDIP3		POLDIP3	-1.63	DNA polymerase delta interacting protein 3	Nucleus	other
	IMM 197	FQ310507	Dicentrarchus labrax chromosome sequence corresponding to linkage group 1 bottom part complete sequence	-1.634	0.039207	G6PC3		G6PC3	-1.634	glucose-6-phosphatase catalytic subunit 3	Cytoplasm	phosphatase
	TC142410	NM_001160569	Oncorhynchus mykiss Translocon-associated protein subunit gamma (ssrg) mRNA_x0001_gb-BT073210.1- Oncorhynchus mykiss clone omyk-evn-506-129 Translocon-associated protein subunit gamma putative mRNA complete cds	-1.642	0.028203	SSR3		SSR3	-1.642	signal sequence receptor subunit 3	Cytoplasm	other
	TC136342	not-annotated	not-annotated	-1.662	0.001918	ASPM		ASPM	-1.662	assembly factor for spindle microtubules	Nucleus	other
	TC159231	XM_682560	PREDICTED: Danio rerio glucosidase beta (bile acid) 2 (gba2) mRNA	-1.666	6.8e-05	GBA2		GBA2	-1.666	glucosylceramidase beta 2	Cytoplasm	enzyme
	TC156235	CR352326	Zebrafish DNA sequence from clone CH211-105K20 in linkage group 13 Contains the 3' end of the gene for a novel protein similar to vertebrate B-cell CLL/lymphoma 11A (zinc finger protein) (BCL11A zgc:136898) and two CpG islands complete sequence	-1.669	0.000336	BCL11A		BCL11A	-1.669	BAF chromatin remodeling complex subunit BCL11A	Nucleus	transcription regulator
	TC165257	BT079060	Esox lucius clone eluc-evq-525-151 tRNA-dihydrouridine synthase 4-like PP35 putative mRNA complete cds	-1.677	0.047981	DUS4L		DUS4L	-1.677	dihydrouridine synthase 4 like	Other	other
	TC155958	DQ683253	Paralichthys olivaceus protein tyrosine phosphatase alpha mRNA complete cds	-1.678	0.018029	PTPRA		PTPRA	-1.678	protein tyrosine phosphatase receptor type A	Plasma Membrane	phosphatase
	TC160379	XM_002723009	PREDICTED: Oryctolagus cuniculus CLIP-associating protein 1-like transcript variant 6 (LOC100345130) mRNA	-1.68	0.025877	CLASP1		CLASP1	-1.68	cytoplasmic linker associated protein 1	Cytoplasm	other
	TC153133	NM_001139950	Salmo salar Gap junction beta-1 protein (cxb1) mRNA_x0001_gb-BT044946.1- Salmo salar clone ssal-rgf-508-087 Gap junction beta-1 protein putative mRNA complete cds	-1.681	0.021662	GJB1		GJB1	-1.681	gap junction protein beta 1	Plasma Membrane	transporter
	TC155665	NM_001146648	Salmo salar Zinc finger protein 391 (zn391) mRNA_x0001_gb-BT056386.1- Salmo salar clone ssal-eve-563-079 Zinc finger protein 391 putative mRNA complete cds	-1.686	0.040508	ZNF729		ZNF729	-1.686	zinc finger protein 729	Other	other
	TC134428	not-annotated	not-annotated	-1.69	4e-06	TRIM69		TRIM69	-1.69	tripartite motif containing 69	Nucleus	enzyme
	TC146399	not-annotated	not-annotated	-1.711	0.020386	MLLT11		MLLT11	-1.711	MLLT11 transcription factor 7 cofactor	Cytoplasm	other
	CUST_23_PI420312184	NM_001124316	Oncorhynchus mykiss virus-induced CXC chemokine (LOC100135977) mRNA_x0001_gb-AF396869.1- Oncorhynchus mykiss virus-induced CXC chemokine mRNA complete cds	-1.712	0.008272	CXCL10		CXCL10	-1.712	C-X-C motif chemokine ligand 10	Extracellular Space	cytokine
	TC160360	BT072307	Salmo salar clone ssal-rgf-520-296 5-nucleotidase domain-containing protein 2 putative mRNA partial cds	-1.715	0.003293	NT5DC2		NT5DC2	-1.715	5'-nucleotidase domain containing 2	Cytoplasm	other
	TC150888	NM_001141475	Salmo salar RING finger protein 121 (rn121) mRNA_x0001_gb-BT049806.1- Salmo salar clone ssal-sjb-015-271 RING finger protein 121 putative mRNA complete cds	-1.716	0.049994	RNF121		RNF121	-1.716	ring finger protein 121	Other	other
	TC155188	NM_001140155	Salmo salar Nuclear ubiquitous casein and cyclin-dependent kinases substrate (nucks) mRNA_x0001_gb-BT045338.1- Salmo salar clone ssal-rgf-518-287 Nuclear ubiquitous casein and cyclin-dependent kinases substrate putative mRNA complete cds	-1.719	0.024934	NUCKS1		NUCKS1	-1.719	nuclear casein kinase and cyclin dependent kinase substrate 1	Nucleus	kinase
	TC152964	CR696798	Tetraodon nigroviridis full-length cDNA	-1.737	0.025557	ITFG2		ITFG2	-1.737	integrin alpha FG-GAP repeat containing 2	Cytoplasm	other
	TC140107	not-annotated	not-annotated	-1.748	0.036913	ACBD3		ACBD3	-1.748	acyl-CoA binding domain containing 3	Cytoplasm	other
	TC170476	NM_001171787	Salmo salar sodium/glucose cotransporter member 1 (sglt1) mRNA_x0001_gb-GU129697.1- Salmo salar sodium/glucose cotransporter member 1 (SGLT1) mRNA complete cds	-1.753	0.045114	SLC5A1		SLC5A1	-1.753	solute carrier family 5 member 1	Plasma Membrane	transporter
	TC172606	BT125476	Salmo salar clone ssal-rgb2-556-019 Purpurin precursor putative mRNA complete cds	-1.755	0.024934	RBP4		RBP4	-1.755	retinol binding protein 4	Extracellular Space	other
	TC159846	NM_001139986	Salmo salar LIM domain transcription factor LMO4.1 (lmo41) mRNA_x0001_gb-BT045012.1- Salmo salar clone ssal-rgf-509-330 LIM domain transcription factor LMO4.1 putative mRNA complete cds	-1.76	3e-06	LMO4		LMO4	-1.76	LIM domain only 4	Nucleus	transcription regulator
	TC169286	NM_001165083	Oncorhynchus mykiss Guanine nucleotide-binding protein alpha-13 subunit (gna13) mRNA_x0001_gb-BT073829.1- Oncorhynchus mykiss clone omyk-evo-507-199 Guanine nucleotide-binding protein alpha-13 subunit putative mRNA complete cds	-1.775	3.3e-05	GNA13		GNA13	-1.775	G protein subunit alpha 13	Plasma Membrane	enzyme
	TC139323	XM_001341047	PREDICTED: Danio rerio si:ch211-241d21.5 (si:ch211-241d21.5) mRNA	-1.787	0.004549	C1orf228		ARMH1	-1.787	armadillo like helical domain containing 1	Other	other
	TC138842	not-annotated	not-annotated	-1.8	0.030782	ATG16L1		ATG16L1	-1.8	autophagy related 16 like 1	Cytoplasm	enzyme
	TC148277	AY168195	Salvelinus fontinalis clone SfoC129 microsatellite sequence	-1.806	0.018799	COL28A1		COL28A1	-1.806	collagen type XXVIII alpha 1 chain	Extracellular Space	other
	TC150242	not-annotated	not-annotated	-1.815	0.009463	NLRX1		NLRX1	-1.815	NLR family member X1	Cytoplasm	other
	IMM 791	NM_001124254	Oncorhynchus mykiss chemokine CK-1 precursor (LOC100135878) mRNA_x0001_gb-AF093814.1-AF093814 Oncorhynchus mykiss chemokine CK-1 precursor mRNA complete cds	-1.835	0.00971	CCL20		CCL20	-1.835	C-C motif chemokine ligand 20	Extracellular Space	cytokine
	TC139556	CR450717	Zebrafish DNA sequence from clone CH211-33E4 in linkage group 15 complete sequence	-1.843	0.046103	DUSP14		DUSP14	-1.843	dual specificity phosphatase 14	Other	phosphatase
	TC150122	NM_001004579	Danio rerio zgc:92316 (zgc:92316) mRNA_x0001_gb-BC081646.1- Danio rerio zgc:92316 mRNA (cDNA clone MGC:92316 IMAGE:7054887) complete cds	-1.844	0.009368	PIP5K1B		PIP5K1B	-1.844	phosphatidylinositol-4-phosphate 5-kinase type 1 beta	Cytoplasm	kinase
	TC139209	CR717415	Tetraodon nigroviridis full-length cDNA	-1.848	0.042798	ADAM23		ADAM23	-1.848	ADAM metallopeptidase domain 23	Plasma Membrane	peptidase
	TC139322	NM_001139817	Salmo salar Phenylalanyl-tRNA synthetase beta chain (syfb) mRNA_x0001_gb-BT044717.1- Salmo salar clone ssal-rgf-501-290 Phenylalanyl-tRNA synthetase beta chain putative mRNA complete cds	-1.851	1.2e-05	FARSB		FARSB	-1.851	phenylalanyl-tRNA synthetase subunit beta	Cytoplasm	enzyme
	TC132693	HM159472	Salmo salar clone BAC 261D01 Foxl2-like protein (Foxl2) gene complete cds	-1.858	0.000112	FOXL2		FOXL2	-1.858	forkhead box L2	Nucleus	transcription regulator
	IMM 960	FJ184369	Oncorhynchus mykiss type I interferon 2 (IFN2) mRNA complete cds	-1.861	0.041202	IFNA2		IFNA2	-1.861	interferon alpha 2	Extracellular Space	cytokine
	TC161802	BT026836	Gasterosteus aculeatus clone CFW64-D10 mRNA sequence	-1.864	0.000267	CDCA7		CDCA7	-1.864	cell division cycle associated 7	Nucleus	other
	TC166344	NM_001161448	Oncorhynchus mykiss apolipoprotein A-II (apoa2) mRNA_x0001_dbj-AB212663.1- Oncorhynchus mykiss apoa2 mRNA for apolipoprotein A-II complete cds	-1.866	0.018721	APOA2		APOA2	-1.866	apolipoprotein A2	Extracellular Space	transporter
	TC145023	XM_002191295	PREDICTED: Taeniopygia guttata similar to adult intestinal phosphatase (LOC100231768) mRNA	-1.878	0.004683	ALPL		ALPL	-1.878	alkaline phosphatase, biomineralization associated	Plasma Membrane	phosphatase
	TC137836	not-annotated	not-annotated	-1.88	4.9e-05	KRTAP12-2		KRTAP12-2	-1.88	keratin associated protein 12-2	Cytoplasm	other
	TC169577	NM_001139809	Salmo salar Dual specificity mitogen-activated protein kinase kinase 2 (mp2k2) mRNA_x0001_gb-BT044702.1- Salmo salar clone ssal-rgf-501-059 Dual specificity mitogen-activated protein kinase kinase 2 putative mRNA complete cds	-1.882	0.032884	MAP2K2		MAP2K2	-1.882	mitogen-activated protein kinase kinase 2	Cytoplasm	kinase
	TC147829	NM_001123688	Salmo salar dopachrome tautomerase (dct) mRNA_x0001_gb-DQ408548.1- Salmo salar dopachrome tautomerase (Dct) mRNA complete cds	-1.89	0.04806	DCT		DCT	-1.89	dopachrome tautomerase	Cytoplasm	enzyme
	TC156580	BC117601	Danio rerio LIM homeobox 8 mRNA (cDNA clone MGC:136448 IMAGE:7893804) complete cds	-1.895	0.005888	LHX8		LHX8	-1.895	LIM homeobox 8	Nucleus	transcription regulator
	TC161272	NM_001140266	Salmo salar glutamine-fructose-6-phosphate transaminase 1 (gfpt1) mRNA_x0001_gb-BT045550.1- Salmo salar clone ssal-rgf-524-280 Glucosamine--fructose-6-phosphate aminotransferase 1 putative mRNA complete cds	-1.896	0.03807	GFPT1		GFPT1	-1.896	glutamine--fructose-6-phosphate transaminase 1	Cytoplasm	enzyme
	TC157315	not-annotated	not-annotated	-1.904	0.037619	IPCEF1		IPCEF1	-1.904	interaction protein for cytohesin exchange factors 1	Cytoplasm	enzyme
	TC154695	BT028136	Gasterosteus aculeatus clone CNB139-F01 mRNA sequence	-1.905	0.030269	DDOST		DDOST	-1.905	dolichyl-diphosphooligosaccharide--protein glycosyltransferase non-catalytic subunit	Cytoplasm	enzyme
	TC150955	not-annotated	not-annotated	-1.918	0.000737	ERMAP		ERMAP	-1.918	erythroblast membrane associated protein (Scianna blood group)	Cytoplasm	other
	TC157783	NM_001140220	Salmo salar RER1 retention in endoplasmic reticulum 1 homolog (S. cerevisiae) (rer1) mRNA_x0001_gb-BT045447.1- Salmo salar clone ssal-rgf-521-332 RER1 putative mRNA complete cds	-1.92	0.046697	RER1		RER1	-1.92	retention in endoplasmic reticulum sorting receptor 1	Cytoplasm	other
	TC155204	NM_001165333	Salmo salar Anaphase-promoting complex subunit 5 (anc5) mRNA_x0001_gb-BT058792.1- Salmo salar clone ssal-rgf-503-119 Anaphase-promoting complex subunit 5 putative mRNA complete cds	-1.926	4e-06	ANAPC5		ANAPC5	-1.926	anaphase promoting complex subunit 5	Nucleus	other
	TC147603	BT058975	Salmo salar clone ssal-rgf-517-191 Transmembrane 9 superfamily member 2 precursor putative mRNA complete cds	-1.934	0.002466	TM9SF2		TM9SF2	-1.934	transmembrane 9 superfamily member 2	Plasma Membrane	transporter
	TC162552	AY883999	Oncorhynchus mykiss Toll-like receptor 3 gene promoter region and complete cds	-1.936	3.3e-05	RNH1		RNH1	-1.936	ribonuclease/angiogenin inhibitor 1	Cytoplasm	other
	TC161781	GU475968	Gadus morhua DNA (cytosine-5)-methyltransferase 3b mRNA partial cds	-1.937	0.033316	DNMT3B		DNMT3B	-1.937	DNA methyltransferase 3 beta	Nucleus	enzyme
	TC164903	not-annotated	not-annotated	-1.952	0.034501	CEP97		CEP97	-1.952	centrosomal protein 97	Cytoplasm	other
	TC140495	BT048359	Salmo salar clone ssal-eve-502-114 Nuclear protein 1 putative mRNA complete cds	-1.952	0.017172	NUPR1		NUPR1	-1.952	nuclear protein 1, transcriptional regulator	Nucleus	transcription regulator
	TC139818	not-annotated	not-annotated	-1.967	0.028894	SLC7A2		SLC7A2	-1.967	solute carrier family 7 member 2	Plasma Membrane	transporter
	TC140696	CU693366	Zebrafish DNA sequence from clone CH1073-209E23 complete sequence	-1.981	0.001174	GREM1		GREM1	-1.981	gremlin 1, DAN family BMP antagonist	Extracellular Space	other
	TC165340	BC165615	Danio rerio mannosyl (beta-14-)-glycoprotein beta-14-N-acetylglucosaminyltransferase mRNA (cDNA clone MGC:192703 IMAGE:100061162) complete cds	-1.984	0.021662	MGAT3		MGAT3	-1.984	beta-1,4-mannosyl-glycoprotein 4-beta-N-acetylglucosaminyltransferase	Cytoplasm	enzyme
	TC156081	XM_695327	PREDICTED: Danio rerio sc:d0321 (sc:d0321) mRNA	-1.995	0.008548	LRRC3B		LRRC3B	-1.995	leucine rich repeat containing 3B	Other	other
	IMM 323	BT045161	Salmo salar clone ssal-rgf-513-335 NDRG1 putative mRNA complete cds	-1.996	0.008684	NDRG1		NDRG1	-1.996	N-myc downstream regulated 1	Nucleus	kinase
	TC166457	XM_001512727	PREDICTED: Ornithorhynchus anatinus similar to synaptotagmin-like protein 2-a delta 2S-III (LOC100082078) mRNA	-2.002	0.000245	SYTL2		SYTL2	-2.002	synaptotagmin like 2	Cytoplasm	other
	TC144482	BT072356	Salmo salar clone ssal-rgf-522-211 unknown large open reading frame mRNA novel cds	-2.005	0.004753	CD84		CD84	-2.005	CD84 molecule	Plasma Membrane	other
	TC155290	FJ438515	Epinephelus coioides CUB/zona pellucida-like domains 1-like protein mRNA partial cds	-2.015	0.008047	DMBT1		DMBT1	-2.015	deleted in malignant brain tumors 1	Plasma Membrane	cell surface receptor
	TC152484	NM_001124408	Oncorhynchus mykiss complement component C8 gamma (LOC100136109) mRNA_x0001_emb-AJ622904.2- Oncorhynchus mykiss mRNA for complement component C8 gamma (c8 gamma gene)	-2.022	0.034547	C8G		C8G	-2.022	complement C8 gamma chain	Extracellular Space	transporter
	TC170054	DQ512736	Oncorhynchus mykiss serum albumin mRNA partial cds	-2.027	0.027601	ALB		ALB	-2.027	albumin	Extracellular Space	transporter
	TC158068	NM_001104692	Oryzias latipes Me-HNF3b protein (foxa2) mRNA_x0001_dbj-AB001572.2- Oryzias latipes Me-HNF3b mRNA for Me-HNF3B complete cds	-2.047	0.000816	FOXA2		FOXA2	-2.047	forkhead box A2	Nucleus	transcription regulator
	TC167777	BT047938	Salmo salar clone ssal-eve-525-057 Hydroxyacylglutathione hydrolase putative mRNA complete cds	-2.072	0.007606	HAGH		HAGH	-2.072	hydroxyacylglutathione hydrolase	Cytoplasm	enzyme
	TC152678	EU325854	Oncorhynchus masou formosanus RNase 2 mRNA complete cds	-2.074	0.037663	ANG		ANG	-2.074	angiogenin	Extracellular Space	enzyme
	TC171926	NM_001141271	Salmo salar Annexin A1 (anxa1) mRNA_x0001_gb-BT048867.1- Salmo salar clone ssal-rgb2-647-115 Annexin A1 putative mRNA complete cds	-2.078	0.000377	ANXA1		ANXA1	-2.078	annexin A1	Plasma Membrane	enzyme
	TC147079	GU130435	Gasterosteus aculeatus pituitary homeobox 1 (Pitx1) gene Pitx1-SALR allele complete cds alternatively spliced	-2.088	0.037725	CHRNA9		CHRNA9	-2.088	cholinergic receptor nicotinic alpha 9 subunit	Plasma Membrane	cell surface receptor
	TC157516	AY686211	Culicoides sonorensis gelsolin gene partial cds	-2.116	0.001356	GSN		GSN	-2.116	gelsolin	Extracellular Space	other
	TC145031	HM159471	Salmo salar clone BAC 217E24 Foxl2 pseudogene complete sequence	-2.122	6e-06	MEGF6		MEGF6	-2.122	multiple EGF like domains 6	Cytoplasm	other
	TC146373	NM_001173931	Salmo salar CDC5 cell division cycle 5-like (S. pombe) (cdc5l) mRNA_x0001_gb-BT059148.1- Salmo salar clone ssal-rgf-528-135 Cell division cycle 5-like protein putative mRNA complete cds	-2.125	0.023476	CDC5L		CDC5L	-2.125	cell division cycle 5 like	Nucleus	transcription regulator
	TC144888	NM_001141648	Salmo salar Mitogen-activated protein kinase 13 (mk13) mRNA_x0001_gb-BT045823.1- Salmo salar clone ssal-rgf-532-251 Mitogen-activated protein kinase 13 putative mRNA complete cds	-2.131	8.7e-05	MAPK13		MAPK13	-2.131	mitogen-activated protein kinase 13	Cytoplasm	kinase
	TC169491	GU129139	Salmo salar IgH locus A genomic sequence	-2.136	0.005616	GPI		GPI	-2.136	glucose-6-phosphate isomerase	Extracellular Space	enzyme
	IMM 1072	S56372	Oncorhynchus mykiss complement protein (C9) mRNA partial cds	-2.139	0.020965	C7		C7	-2.139	complement C7	Extracellular Space	other
	TC164043	not-annotated	not-annotated	-2.146	0.017225	CUZD1		CUZD1	-2.146	CUB and zona pellucida like domains 1	Plasma Membrane	other
	TC143355	NM_001195163	Oncorhynchus mykiss akirin 1(2a) (LOC100499585) mRNA_x0001_gb-GQ247782.1- Oncorhynchus mykiss akirin 1(2a) mRNA complete cds	-2.156	0.02698	AKIRIN1		AKIRIN1	-2.156	akirin 1	Cytoplasm	enzyme
	TC172407	HQ021541	Sparus aurata clone contig00199 genomic sequence	-2.156	0.044882	KIF18A		KIF18A	-2.156	kinesin family member 18A	Cytoplasm	enzyme
	IMM 155	NM_001123277	Danio rerio si:dkey-91i10.3 (si:dkey-91i10.3) mRNA	-2.17	0.006417	CYP27A1		CYP27A1	-2.17	cytochrome P450 family 27 subfamily A member 1	Cytoplasm	enzyme
	TC147288	NM_001141066	Salmo salar Homeobox protein koza (koza) mRNA_x0001_gb-BT048121.1- Salmo salar clone ssal-eve-552-339 Homeobox protein koza putative mRNA complete cds	-2.191	9e-06	NKX3-1		NKX3-1	-2.191	NK3 homeobox 1	Nucleus	transcription regulator
	TC158717	tpg-BK006271.1-	TPA_inf: Oryzias latipes Twist3a mRNA complete cds	-2.197	0.0465	TWIST1		TWIST1	-2.197	twist family bHLH transcription factor 1	Nucleus	transcription regulator
	TC134726	NM_001140179	Salmo salar Targeting protein for Xklp2 (tpx2) mRNA_x0001_gb-BT045380.1- Salmo salar clone ssal-rgf-519-320 Targeting protein for Xklp2 putative mRNA complete cds	-2.214	0.045411	TPX2		TPX2	-2.214	TPX2 microtubule nucleation factor	Nucleus	other
	TC137010	NM_001140434	Salmo salar cyclin E2 (ccne2) mRNA_x0001_gb-BT045855.1- Salmo salar clone ssal-rgf-534-307 G1/S-specific cyclin-E2 putative mRNA complete cds	-2.228	0.034628	CCNE2		CCNE2	-2.228	cyclin E2	Nucleus	other
	TC135860	not-annotated	not-annotated	-2.252	1.9e-05	GRK5		GRK5	-2.252	G protein-coupled receptor kinase 5	Plasma Membrane	kinase
	TC142811	AM993097	Dicentrarchus labrax partial mRNA for pif1 protein	-2.29	0.046432	PIF1		PIF1	-2.29	PIF1 5'-to-3' DNA helicase	Nucleus	enzyme
	TC172481	HM208332	Oncorhynchus mykiss clone BAC20-C13 zinc transporter (SLC39A7.B) gene MHC class I antigen (Onmy-UGA) gene Onmy-UGA-OSU allele RING1.B ribosomal protein S18 (RPS18.B) vacuolar protein sorting-associated protein 52-like protein (VPS52.b) putative adhesion protein (VIG-B319.b) hyopthetical protein and cyclic AMP-dependent transcription factor ATF-6 alpha-like protein (ATF6) genes complete cds; and T…	-2.3	0.016449	KLHDC3		KLHDC3	-2.3	kelch domain containing 3	Cytoplasm	other
	TC143862	NM_001146480	Salmo salar NIF3-like protein 1 (nif3l) mRNA_x0001_gb-BT056978.1- Salmo salar clone ssal-eve-575-326 NIF3-like protein 1 putative mRNA complete cds	-2.327	1.3e-05	NIF3L1		NIF3L1	-2.327	NGG1 interacting factor 3 like 1	Cytoplasm	other
	TC141348	BT059411	Salmo salar clone ssal-rgf-505-285 DnaJ homolog subfamily C member 5 putative mRNA complete cds	-2.33	0.028446	DNAJC5		DNAJC5	-2.33	DnaJ heat shock protein family (Hsp40) member C5	Plasma Membrane	other
	TC148316	NM_001165220	Oncorhynchus mykiss RAS related protein 1b (rap1b) mRNA_x0001_gb-BT074381.1- Oncorhynchus mykiss clone omyk-evo-509-178 Ras-related protein Rap-1b precursor putative mRNA complete cds	-2.379	0.03315	RAP1B		RAP1B	-2.379	RAP1B, member of RAS oncogene family	Cytoplasm	enzyme
	TC162369	BT048184	Salmo salar clone ssal-evf-522-280 dpy-30 homolog putative mRNA complete cds	-2.386	0.012535	DPY30		DPY30	-2.386	dpy-30 histone methyltransferase complex regulatory subunit	Nucleus	other
	TC139804	NM_001140257	Salmo salar COMM domain-containing protein 1 (comd1) mRNA_x0001_gb-BT045533.1- Salmo salar clone ssal-rgf-524-134 COMM domain-containing protein 1 putative mRNA complete cds	-2.389	0.021515	COMMD1		COMMD1	-2.389	copper metabolism domain containing 1	Nucleus	transporter
	TC139528	BT072676	Salmo salar clone ssal-rgf-536-057 Myosin-IXb putative mRNA partial cds	-2.391	0.032575	MYO9B		MYO9B	-2.391	myosin IXB	Cytoplasm	enzyme
	TC148181	NM_001139786	Salmo salar Globoside alpha-13-N-acetylgalactosaminyltransferase 1 (gbgt1) mRNA_x0001_gb-BT044652.1- Salmo salar clone ssal-rgf-001-381 Globoside alpha-13-N-acetylgalactosaminyltransferase 1 putative mRNA complete cds	-2.4	0.000817	GBGT1		GBGT1	-2.4	globoside alpha-1,3-N-acetylgalactosaminyltransferase 1 (FORS blood group)	Other	enzyme
	TC163748	not-annotated	not-annotated	-2.402	4e-06	GALNT18		GALNT18	-2.402	polypeptide N-acetylgalactosaminyltransferase 18	Cytoplasm	enzyme
	TC170082	not-annotated	not-annotated	-2.404	0.008752	PHGR1		PHGR1	-2.404	proline, histidine and glycine rich 1	Other	other
	TC152617	U88714	Pleurodeles waltl homeodomain protein Nkx-3.2 (PwNkx-3.2) mRNA complete cds	-2.409	0.025152	NKX3-2		NKX3-2	-2.409	NK3 homeobox 2	Nucleus	transcription regulator
	TC152973	NM_001140884	Salmo salar BRCA1/BRCA2-containing complex subunit 3 (brcc3) mRNA_x0001_gb-BT047393.1- Salmo salar clone ssal-rgb2-584-054 BRCA1/BRCA2-containing complex subunit 3 putative mRNA complete cds	-2.412	0.013983	BRCC3		BRCC3	-2.412	BRCA1/BRCA2-containing complex subunit 3	Nucleus	enzyme
	IMM 938	NM_001124384	Oncorhynchus mykiss prothrombin (LOC100136077) mRNA_x0001_emb-AJ535689.1- Oncorhynchus mykiss mRNA for prothrombin	-2.413	0.043114	F2		F2	-2.413	coagulation factor II, thrombin	Extracellular Space	peptidase
	TC148912	NM_001139905	Salmo salar Zinc transporter 4 (znt4) mRNA_x0001_gb-BT044855.1- Salmo salar clone ssal-rgf-505-296 Zinc transporter 4 putative mRNA complete cds	-2.447	0.007825	SLC30A4		SLC30A4	-2.447	solute carrier family 30 member 4	Cytoplasm	transporter
	TC166766	not-annotated	not-annotated	-2.451	0.012402	SETD9		SETD9	-2.451	SET domain containing 9	Nucleus	enzyme
	TC151457	DQ481663	Takifugu rubripes HoxAa gene cluster complete sequence	-2.454	0.027569	JAZF1		JAZF1	-2.454	JAZF zinc finger 1	Nucleus	transcription regulator
	TC154692	BT027382	Gasterosteus aculeatus clone CFW263-D03 mRNA sequence	-2.467	0.025242	PLS3		PLS3	-2.467	plastin 3	Cytoplasm	other
	TC164647	BT059449	Salmo salar clone ssal-rgf-525-153 U4/U6 small nuclear ribonucleoprotein Prp4 putative mRNA complete cds	-2.473	0.02068	PPP1R3B		PPP1R3B	-2.473	protein phosphatase 1 regulatory subunit 3B	Cytoplasm	phosphatase
	TC140766	BT072258	Salmo salar clone ssal-rgf-518-325 FKBP12-rapamycin complex-associated protein putative mRNA partial cds	-2.516	0.013089	MTOR		MTOR	-2.516	mechanistic target of rapamycin kinase	Nucleus	kinase
	TC137905	not-annotated	not-annotated	-2.532	0.046637	TMC5		TMC5	-2.532	transmembrane channel like 5	Cytoplasm	other
	TC134614	not-annotated	not-annotated	-2.551	0.040195	PIGG		PIGG	-2.551	phosphatidylinositol glycan anchor biosynthesis class G	Cytoplasm	enzyme
	TC167495	XM_684442	PREDICTED: Danio rerio inhibitor of kappa light polypeptide gene enhancer in B-cells kinase complex-associated protein like (ikbkapl) mRNA	-2.577	0.001688	IKBKAP		ELP1	-2.577	elongator complex protein 1	Cytoplasm	other
	TC157253	BT079757	Esox lucius clone eluc-evq-509-281 3-oxoacyl-acyl-carrier-protein reductase putative mRNA complete cds	-2.58	0.034888	DHRS4		DHRS4	-2.58	dehydrogenase/reductase 4	Cytoplasm	enzyme
	TC142394	BT046785	Salmo salar clone ssal-rgb2-598-380 Transmembrane protein 53 putative mRNA complete cds	-2.593	0.005182	TMEM53		TMEM53	-2.593	transmembrane protein 53	Nucleus	other
	TC139260	XM_001920406	PREDICTED: Danio rerio im:7140700 (im:7140700) mRNA	-2.609	0.015189	BRWD1		BRWD1	-2.609	bromodomain and WD repeat domain containing 1	Nucleus	transcription regulator
	TC141639	not-annotated	not-annotated	-2.683	6.2e-05	CRISP3		CRISP3	-2.683	cysteine rich secretory protein 3	Extracellular Space	other
	IMM 131	NM_001124427	Oncorhynchus mykiss complement factor H1 protein (LOC100136131) mRNA_x0001_emb-AM039935.1- Oncorhynchus mykiss mRNA for complement factor H1 protein	-2.754	0.04388	CFHR4		CFHR4	-2.754	complement factor H related 4	Extracellular Space	transporter
	TC165970	BT057618	Salmo salar clone ssal-eve-567-083 Regulator of G-protein signaling 2 putative mRNA complete cds	-2.793	2.9e-05	RGS2		RGS2	-2.793	regulator of G protein signaling 2	Nucleus	enzyme
	TC137396	BT072259	Salmo salar clone ssal-rgf-518-328 ATP-binding cassette sub-family G member 2 putative mRNA partial cds	-2.817	1e-06	ABCG2		ABCG2	-2.817	ATP binding cassette subfamily G member 2 (Junior blood group)	Plasma Membrane	transporter
	TC138419	BC067716	Danio rerio collagen type XIV alpha 1 mRNA (cDNA clone IMAGE:6965582) partial cds	-2.86	0.017129	COL14A1		COL14A1	-2.86	collagen type XIV alpha 1 chain	Extracellular Space	other
	TC159973	BT073728	Oncorhynchus mykiss clone omyk-evo-514-061 40S ribosomal protein S16 putative mRNA complete cds	-2.898	0.022928	RPS16		RPS16	-2.898	ribosomal protein S16	Cytoplasm	other
	TC147391	XM_001365498	PREDICTED: Monodelphis domestica similar to beta3-glucuronyltransferase (LOC100016092) mRNA	-2.899	0.028667	B3GAT2		B3GAT2	-2.899	beta-1,3-glucuronyltransferase 2	Cytoplasm	enzyme
	TC170864	BT043836	Salmo salar clone HM6_0296 myosin regulatory light chain 2-1 mRNA complete cds	-2.902	0.046538	MYLPF		MYLPF	-2.902	myosin light chain, phosphorylatable, fast skeletal muscle	Cytoplasm	other
	TC146228	NM_201333	Danio rerio missing oocyte meiosis regulator homolog (Drosophila) (mios) mRNA_x0001_gb-BC047198.1- Danio rerio missing oocyte meiosis regulator homolog (Drosophila) mRNA (cDNA clone MGC:55958 IMAGE:3819386) complete cds	-2.925	0.001859	MIOS		MIOS	-2.925	meiosis regulator for oocyte development	Cytoplasm	other
	TC157198	not-annotated	not-annotated	-2.932	0.044597	GPR180		GPR180	-2.932	G protein-coupled receptor 180	Cytoplasm	other
	TC140522	NM_001040312	Danio rerio beta-carotene oxygenase 2a (bco2a) mRNA_x0001_gb-BC115259.1- Danio rerio beta-carotene oxygenase 2a mRNA (cDNA clone MGC:136769 IMAGE:7050169) complete cds	-2.971	0.007616	BCO2		BCO2	-2.971	beta-carotene oxygenase 2	Cytoplasm	enzyme
	TC167239	NM_001173735	Salmo salar Serine/threonine-protein kinase PCTAIRE-2 (pctk2) mRNA_x0001_gb-BT059377.1- Salmo salar clone ssal-rgf-523-300 Serine/threonine-protein kinase PCTAIRE-2 putative mRNA complete cds	-3.049	0.030948	CDK17		CDK17	-3.049	cyclin dependent kinase 17	Cytoplasm	kinase
	TC172591	FJ969490	Salmo salar clone BAC CHORI214-439J08 MHC class I antigen (Sasa-UDA) gene Sasa-UDA*0101 allele complete cds; similar to INSD AY523662 (Sasa-UCA) pseudogene Sasa-UCA*0101 allele complete sequence; PSMB8 (PSMB8) PSMB10 (PSMB10) PSMB9b-like protein (PSMB9b-like protein) PSMB9 (PSMB9) TAP2b (TAP2b) BRD2 (BRD2) and hydroxysteroid (17-beta) dehydrogenase 8 (HSD17B8) genes complete cds; and COLLA2 gene …	-3.184	0.018844	HLA		-	-3.184	-	-	-
	TC151196	not-annotated	not-annotated	-3.236	0.034871	GIMAP8		GIMAP8	-3.236	GTPase, IMAP family member 8	Other	other
	TC145246	BC171507	Danio rerio zgc:171696 mRNA (cDNA clone MGC:198234 IMAGE:9039223) complete cds	-3.282	0.018407	SPRYD3		SPRYD3	-3.282	SPRY domain containing 3	Other	other
	TC153288	not-annotated	not-annotated	-3.283	0.034148	NCAN		NCAN	-3.283	neurocan	Extracellular Space	other
	TC166239	AF462234	Salmo salar clone g2 IgL type 3 gene cluster partial sequence	-3.284	0.00038	IGKC		IGKC	-3.284	immunoglobulin kappa constant	Extracellular Space	other
	TC171172	NM_001165075	Oncorhynchus mykiss Proteasome subunit beta type 4 (psb4) mRNA_x0001_gb-BT073805.1- Oncorhynchus mykiss clone omyk-evo-502-172 Proteasome subunit beta type 4 precursor putative mRNA complete cds	-3.351	0.004158	PSMB4		PSMB4	-3.351	proteasome 20S subunit beta 4	Cytoplasm	peptidase
	TC154401	NM_001140966	Salmo salar Dehydrogenase/reductase SDR family member 4 (dhrs4) mRNA_x0001_gb-BT047712.1- Salmo salar clone ssal-evf-504-340 Dehydrogenase/reductase SDR family member 4 putative mRNA complete cds	-3.417	0.003636	DHRS4L2		DHRS4L2	-3.417	dehydrogenase/reductase 4 like 2	Other	other
	TC137459	XM_001506277	PREDICTED: Ornithorhynchus anatinus similar to putative lipid kinase (LOC100074743) mRNA	-3.483	0.005809	CERK		CERK	-3.483	ceramide kinase	Plasma Membrane	kinase
	IMM 707	EF438624	Oncorhynchus mykiss clone 725 IMM unoglobulin mu heavy chain mRNA partial cds	-3.614	0.019506	IGHV3-30		IGHV3-30	-3.614	immunoglobulin heavy variable 3-30	Extracellular Space	other
	TC133057	XM_001921354	PREDICTED: Danio rerio MCF.2 cell line derived transforming sequence-like 2 (mcf2l2) mRNA	-3.655	0.04236	MCF2L		MCF2L	-3.655	MCF.2 cell line derived transforming sequence like	Cytoplasm	other
	TC161750	BT044770	Salmo salar clone ssal-rgf-503-116 Plasminogen activator inhibitor 1 RNA-binding protein putative mRNA complete cds	-4.208	0.002171	SERBP1		SERBP1	-4.208	SERPINE1 mRNA binding protein 1	Cytoplasm	other
	TC158738	BT073531	Oncorhynchus mykiss clone omyk-evn-514-096 Hemoglobin subunit alpha-4 putative mRNA complete cds	-4.607	0.001477	HBA1		HBA1/HBA2	-4.607	hemoglobin subunit alpha 2	Extracellular Space	transporter
	TC146025	NM_001140520	Salmo salar K0841 protein (k0841) mRNA_x0001_gb-BT046011.1- Salmo salar clone ssal-rgf-539-076 KIAA0841 putative mRNA complete cds	-5.019	0.00097	HAUS5		HAUS5	-5.019	HAUS augmin like complex subunit 5	Cytoplasm	other
	TC144764	BT073510	Oncorhynchus mykiss clone omyk-evn-510-070 40S ribosomal protein S27 putative mRNA complete cds	-5.23	0.008224	RPS27L		RPS27L	-5.23	ribosomal protein S27 like	Cytoplasm	translation regulator
	TC140194	XM_002662421	PREDICTED: Danio rerio coiled-coil domain-containing protein 18-like (LOC100331788) mRNA	-5.76	0.018844	CCDC18		CCDC18	-5.76	coiled-coil domain containing 18	Other	other
	TC172619	BT044040	Salmo salar clone HM6_0666 hypothetical protein mRNA partial cds	-5.763	0.001355	ZNF180		ZNF180	-5.763	zinc finger protein 180	Nucleus	transcription regulator
	TC153804	BT080005	Esox lucius clone eluc-evq-522-307 Peroxisome assembly protein 26 putative mRNA complete cds	-5.923	0.000524	PEX26		PEX26	-5.923	peroxisomal biogenesis factor 26	Cytoplasm	other
	TC137075	AB208639	Danio rerio Rab11-FIP4B mRNA for Rab11-family interacting protein 4B complete cds	-6.028	0.010689	RAB11FIP4		RAB11FIP4	-6.028	RAB11 family interacting protein 4	Cytoplasm	other
	TC145745	BT047671	Salmo salar clone ssal-eve-560-067 canopy homolog 2 precursor putative mRNA complete cds	-6.256	0.009291	CNPY2		CNPY2	-6.256	canopy FGF signaling regulator 2	Plasma Membrane	other
	TC145202	NM_031824	Rattus norvegicus CCCTC-binding factor (zinc finger protein) (Ctcf) mRNA	-6.309	0.00965	CTCF		CTCF	-6.309	CCCTC-binding factor	Nucleus	transcription regulator
	TC170834	EU621899	Salmo salar clone 63I10 growth hormone 2 gene complete cds; and skeletal muscle sodium channel alpha subunit-like myosin alkali light chain-like and microtubule-associated protein Tau-like genes complete sequence	-6.566	0.001369	CCDC40		CCDC40	-6.566	coiled-coil domain containing 40	Cytoplasm	other
	TC134641	not-annotated	not-annotated	-7.211	0.000609	MAG		MAG	-7.211	myelin associated glycoprotein	Plasma Membrane	other
	TC149686	AB258536	Oncorhynchus mykiss Onmy-LDA gene for MHC class I antigen allele: Onmy-LDA*0101 and other genes complete cds	-7.28	0.004462	ASB14		ASB14	-7.28	ankyrin repeat and SOCS box containing 14	Cytoplasm	other
	Multiple RNA targets mapped to the same HGNC gene identifier (multiple RNA targets → 1 HGNC gene identifier), with the same direction of change (multiple Log2 FC values averaged)
	TC164339	HQ400613	Oncorhynchus mykiss ABC efflux transporter Abcb1b mRNA partial cds	-1.27	0.000542	ABCB4		ABCB4	-1.645	ATP binding cassette subfamily B member 4	Plasma Membrane	transporter
	TC142529	HQ400613	Oncorhynchus mykiss ABC efflux transporter Abcb1b mRNA partial cds	-2.02	7e-06	ABCB4		ABCB4		ATP binding cassette subfamily B member 4	Plasma Membrane	transporter
	TC157608	NM_001139811	Salmo salar ATP-binding cassette sub-family F (GCN20) member 2 (abcf2) nuclear gene encoding mitochondrial protein mRNA_x0001_gb-BT044705.1- Salmo salar clone ssal-rgf-501-085 ATP-binding cassette sub-family F member 2 putative mRNA complete cds	2.553	1e-06	ABCF2		ABCF2	2.30567	ATP binding cassette subfamily F member 2	Cytoplasm	transporter
	TC153932	NM_001139811	Salmo salar ATP-binding cassette sub-family F (GCN20) member 2 (abcf2) nuclear gene encoding mitochondrial protein mRNA_x0001_gb-BT044705.1- Salmo salar clone ssal-rgf-501-085 ATP-binding cassette sub-family F member 2 putative mRNA complete cds	2.379	0.000475	ABCF2		ABCF2		ATP binding cassette subfamily F member 2	Cytoplasm	transporter
	TC151203	NM_001139811	Salmo salar ATP-binding cassette sub-family F (GCN20) member 2 (abcf2) nuclear gene encoding mitochondrial protein mRNA_x0001_gb-BT044705.1- Salmo salar clone ssal-rgf-501-085 ATP-binding cassette sub-family F member 2 putative mRNA complete cds	1.985	8.1e-05	ABCF2		ABCF2		ATP binding cassette subfamily F member 2	Cytoplasm	transporter
	TC145101	BT072734	Salmo salar clone ssal-rgf-538-200 ATP-binding cassette sub-family F member 3 putative mRNA pseudogene cds	1.405	0.000838	ABCF3		ABCF3	1.265	ATP binding cassette subfamily F member 3	Other	transporter
	TC139831	BT072734	Salmo salar clone ssal-rgf-538-200 ATP-binding cassette sub-family F member 3 putative mRNA pseudogene cds	1.125	0.001089	ABCF3		ABCF3		ATP binding cassette subfamily F member 3	Other	transporter
	TC148603	NM_001173759	Salmo salar Abhydrolase domain-containing protein FAM108B1 (f108b) mRNA_x0001_gb-BT059431.1- Salmo salar clone ssal-rgf-535-234 Abhydrolase domain-containing protein FAM108B1 precursor putative mRNA complete cds	2.436	4e-06	ABHD17B		ABHD17B	2.267	abhydrolase domain containing 17B, depalmitoylase	Plasma Membrane	peptidase
	TC159819	NM_001173759	Salmo salar Abhydrolase domain-containing protein FAM108B1 (f108b) mRNA_x0001_gb-BT059431.1- Salmo salar clone ssal-rgf-535-234 Abhydrolase domain-containing protein FAM108B1 precursor putative mRNA complete cds	2.098	0.000774	ABHD17B		ABHD17B		abhydrolase domain containing 17B, depalmitoylase	Plasma Membrane	peptidase
	TC157535	BC127562	Danio rerio wu:fk81d02 mRNA (cDNA clone IMAGE:7070729) partial cds	-1.385	0.027115	ACSBG2		ACSBG2	-1.6515	acyl-CoA synthetase bubblegum family member 2	Cytoplasm	enzyme
	TC146770	not-annotated	not-annotated	-1.918	1.3e-05	ACSBG2		ACSBG2		acyl-CoA synthetase bubblegum family member 2	Cytoplasm	enzyme
	IMM 1094	EF636801	Gobiocypris rarus argonaute 2 (AGO2) mRNA complete cds	1.093	0.026549	AGO2		AGO2	1.0495	argonaute RISC catalytic component 2	Cytoplasm	translation regulator
	IMM 1094	EF636801	Gobiocypris rarus argonaute 2 (AGO2) mRNA complete cds	1.006	0.049504	AGO2		AGO2		argonaute RISC catalytic component 2	Cytoplasm	translation regulator
	TC169810	BT071876	Salmo salar clone ssal-rgf-501-216 unknown large open reading frame mRNA novel cds	1.443	0.010294	AHNAK		AHNAK	1.402	AHNAK nucleoprotein	Nucleus	other
	TC167413	BT072112	Salmo salar clone ssal-rgf-512-079 Neuroblast differentiation-associated protein AHNAK putative mRNA partial cds	1.361	0.016489	AHNAK		AHNAK		AHNAK nucleoprotein	Nucleus	other
	TC136560	FJ969489	Salmo salar clone BAC CHORI214-184H23 aryl hydrocarbon receptor 2 alpha (AhR2a) gene partial cds; aryl hydrocarbon receptor 1 beta-like protein (AhR1b) gene MHC class I antigen (Sasa-UHA1) gene Sasa-UHA1*0101 allele MHC class I antigen (Sasa-UHA2) gene Sasa-UHA2*0101 allele and 1-acylglycerol-3-phosphate O-acyltransferase 3 (AGPAT3) gene complete cds; and pyroxidal kinase (PDXK) gene partial cds	-1.362	4e-05	AHR		AHR	-1.47333	aryl hydrocarbon receptor	Nucleus	ligand-dependent nuclear receptor
	TC168114	FJ969489	Salmo salar clone BAC CHORI214-184H23 aryl hydrocarbon receptor 2 alpha (AhR2a) gene partial cds; aryl hydrocarbon receptor 1 beta-like protein (AhR1b) gene MHC class I antigen (Sasa-UHA1) gene Sasa-UHA1*0101 allele MHC class I antigen (Sasa-UHA2) gene Sasa-UHA2*0101 allele and 1-acylglycerol-3-phosphate O-acyltransferase 3 (AGPAT3) gene complete cds; and pyroxidal kinase (PDXK) gene partial cds	-1.363	7.1e-05	AHR		AHR		aryl hydrocarbon receptor	Nucleus	ligand-dependent nuclear receptor
	TC162231	FJ969489	Salmo salar clone BAC CHORI214-184H23 aryl hydrocarbon receptor 2 alpha (AhR2a) gene partial cds; aryl hydrocarbon receptor 1 beta-like protein (AhR1b) gene MHC class I antigen (Sasa-UHA1) gene Sasa-UHA1*0101 allele MHC class I antigen (Sasa-UHA2) gene Sasa-UHA2*0101 allele and 1-acylglycerol-3-phosphate O-acyltransferase 3 (AGPAT3) gene complete cds; and pyroxidal kinase (PDXK) gene partial cds	-1.695	0.039485	AHR		AHR		aryl hydrocarbon receptor	Nucleus	ligand-dependent nuclear receptor
	TC132546	NM_001165183	Oncorhynchus mykiss CF166 protein (cf166) mRNA_x0001_gb-BT074237.1- Oncorhynchus mykiss clone omyk-evo-512-355 C6orf166 putative mRNA complete cds	1.225	0.000528	AKIRIN2		AKIRIN2	1.1475	akirin 2	Nucleus	other
	TC137056	NM_001195165	Oncorhynchus mykiss akirin 2(1a) (LOC100499587) mRNA_x0001_gb-GQ247784.1- Oncorhynchus mykiss akirin 2(1a) mRNA complete cds	1.07	0.00026	AKIRIN2		AKIRIN2		akirin 2	Nucleus	other
	IMM 1013	AY594646	Oncorhynchus mykiss cathelicidin (CATH-1) gene complete cds	4.006	1e-06	AMP		-	2.99333	-	-	-
	IMM 486	NM_001124480	Oncorhynchus mykiss cathelicidin 1 (LOC100136204) mRNA_x0001_gb-AY382478.1- Oncorhynchus mykiss cathelicidin 1 mRNA complete cds	3.9	3e-06	AMP		-		-	-	-
	TC159998	NM_001124480	Oncorhynchus mykiss cathelicidin 1 (LOC100136204) mRNA_x0001_gb-AY382478.1- Oncorhynchus mykiss cathelicidin 1 mRNA complete cds	3.868	1e-06	AMP		-		-	-	-
	TC146846	NM_001124480	Oncorhynchus mykiss cathelicidin 1 (LOC100136204) mRNA_x0001_gb-AY382478.1- Oncorhynchus mykiss cathelicidin 1 mRNA complete cds	3.728	2e-06	AMP		-		-	-	-
	IMM 486	NM_001124480	Oncorhynchus mykiss cathelicidin 1 (LOC100136204) mRNA_x0001_gb-AY382478.1- Oncorhynchus mykiss cathelicidin 1 mRNA complete cds	3.635	1e-06	AMP		-		-	-	-
	IMM 486	NM_001124480	Oncorhynchus mykiss cathelicidin 1 (LOC100136204) mRNA_x0001_gb-AY382478.1- Oncorhynchus mykiss cathelicidin 1 mRNA complete cds	3.625	2e-06	AMP		-		-	-	-
	IMM 568	NM_001124480	Oncorhynchus mykiss cathelicidin 1 (LOC100136204) mRNA_x0001_gb-AY382478.1- Oncorhynchus mykiss cathelicidin 1 mRNA complete cds	3.571	2e-06	AMP		-		-	-	-
	IMM 984	NM_001124480	Oncorhynchus mykiss cathelicidin 1 (LOC100136204) mRNA_x0001_gb-AY382478.1- Oncorhynchus mykiss cathelicidin 1 mRNA complete cds	3.557	7e-06	AMP		-		-	-	-
	IMM 984	NM_001124480	Oncorhynchus mykiss cathelicidin 1 (LOC100136204) mRNA_x0001_gb-AY382478.1- Oncorhynchus mykiss cathelicidin 1 mRNA complete cds	3.473	4e-06	AMP		-		-	-	-
	IMM 985	AY594646	Oncorhynchus mykiss cathelicidin (CATH-1) gene complete cds	3.418	4.2e-05	AMP		-		-	-	-
	IMM 568	NM_001124480	Oncorhynchus mykiss cathelicidin 1 (LOC100136204) mRNA_x0001_gb-AY382478.1- Oncorhynchus mykiss cathelicidin 1 mRNA complete cds	3.379	3e-06	AMP		-		-	-	-
	IMM 1013	AY594646	Oncorhynchus mykiss cathelicidin (CATH-1) gene complete cds	3.377	6.1e-05	AMP		-		-	-	-
	IMM 1013	AY594646	Oncorhynchus mykiss cathelicidin (CATH-1) gene complete cds	3.355	8e-06	AMP		-		-	-	-
	IMM 984	NM_001124480	Oncorhynchus mykiss cathelicidin 1 (LOC100136204) mRNA_x0001_gb-AY382478.1- Oncorhynchus mykiss cathelicidin 1 mRNA complete cds	3.346	3e-06	AMP		-		-	-	-
	IMM 568	NM_001124480	Oncorhynchus mykiss cathelicidin 1 (LOC100136204) mRNA_x0001_gb-AY382478.1- Oncorhynchus mykiss cathelicidin 1 mRNA complete cds	3.28	9e-06	AMP		-		-	-	-
	IMM 985	AY594646	Oncorhynchus mykiss cathelicidin (CATH-1) gene complete cds	3.064	0.000184	AMP		-		-	-	-
	IMM 985	AY594646	Oncorhynchus mykiss cathelicidin (CATH-1) gene complete cds	2.663	6.1e-05	AMP		-		-	-	-
	TC151905	NM_001124463	Oncorhynchus mykiss cathelicidin antimicrobial peptide (LOC100136187) mRNA_x0001_gb-AY360356.1- Oncorhynchus mykiss cathelicidin antimicrobial peptide mRNA complete cds	2.024	9.2e-05	AMP		-		-	-	-
	IMM 563	NM_001124463	Oncorhynchus mykiss cathelicidin antimicrobial peptide (LOC100136187) mRNA_x0001_gb-AY360356.1- Oncorhynchus mykiss cathelicidin antimicrobial peptide mRNA complete cds	1.967	0.000116	AMP		-		-	-	-
	IMM 563	NM_001124463	Oncorhynchus mykiss cathelicidin antimicrobial peptide (LOC100136187) mRNA_x0001_gb-AY360356.1- Oncorhynchus mykiss cathelicidin antimicrobial peptide mRNA complete cds	1.897	0.000159	AMP		-		-	-	-
	IMM 563	NM_001124463	Oncorhynchus mykiss cathelicidin antimicrobial peptide (LOC100136187) mRNA_x0001_gb-AY360356.1- Oncorhynchus mykiss cathelicidin antimicrobial peptide mRNA complete cds	1.768	0.000187	AMP		-		-	-	-
	IMM 482	NM_001124463	Oncorhynchus mykiss cathelicidin antimicrobial peptide (LOC100136187) mRNA_x0001_gb-AY360356.1- Oncorhynchus mykiss cathelicidin antimicrobial peptide mRNA complete cds	1.751	0.000351	AMP		-		-	-	-
	IMM 482	NM_001124463	Oncorhynchus mykiss cathelicidin antimicrobial peptide (LOC100136187) mRNA_x0001_gb-AY360356.1- Oncorhynchus mykiss cathelicidin antimicrobial peptide mRNA complete cds	1.612	0.000701	AMP		-		-	-	-
	IMM 482	NM_001124463	Oncorhynchus mykiss cathelicidin antimicrobial peptide (LOC100136187) mRNA_x0001_gb-AY360356.1- Oncorhynchus mykiss cathelicidin antimicrobial peptide mRNA complete cds	1.576	0.001437	AMP		-		-	-	-
	TC143995	BT027676	Gasterosteus aculeatus clone CGX83-B03 mRNA sequence	2.149	3e-06	ANGPTL7		ANGPTL7	2.0185	angiopoietin like 7	Extracellular Space	other
	TC137830	BT027676	Gasterosteus aculeatus clone CGX83-B03 mRNA sequence	1.888	1e-05	ANGPTL7		ANGPTL7		angiopoietin like 7	Extracellular Space	other
	TC150875	BT058891	Salmo salar clone ssal-rgf-511-242 Annexin A11 putative mRNA complete cds	3.623	0	ANXA11		ANXA11	2.81167	annexin A11	Nucleus	other
	TC136617	BT058891	Salmo salar clone ssal-rgf-511-242 Annexin A11 putative mRNA complete cds	3.23	0	ANXA11		ANXA11		annexin A11	Nucleus	other
	TC152588	NM_001139997	Salmo salar Annexin A11 (anx11) mRNA_x0001_gb-BT045034.1- Salmo salar clone ssal-rgf-510-144 Annexin A11 putative mRNA complete cds	1.582	3.1e-05	ANXA11		ANXA11		annexin A11	Nucleus	other
	TC141368	XM_002664306	PREDICTED: Danio rerio AP-1 complex-associated regulatory protein-like (LOC100332265) mRNA	2.396	0.00126	AP1AR		AP1AR	1.765	adaptor related protein complex 1 associated regulatory protein	Cytoplasm	other
	TC135562	XM_002664306	PREDICTED: Danio rerio AP-1 complex-associated regulatory protein-like (LOC100332265) mRNA	1.134	0.011334	AP1AR		AP1AR		adaptor related protein complex 1 associated regulatory protein	Cytoplasm	other
	TC136881	tpg-BK001400.1-	TPA_exp: Oncorhynchus mykiss arginase type II (ARG02) mRNA complete cds	2.58	3e-06	ARG2		ARG2	2.4235	arginase 2	Cytoplasm	enzyme
	TC160594	tpg-BK001404.1-	TPA_inf: Oncorhynchus mykiss arginase type IIb mRNA partial cds	2.267	1.4e-05	ARG2		ARG2		arginase 2	Cytoplasm	enzyme
	TC165739	BT026910	Gasterosteus aculeatus clone CFW98-B08 mRNA sequence	-1.013	0.002741	ARPC1A		ARPC1A	-1.02767	actin related protein 2/3 complex subunit 1A	Extracellular Space	other
	TC168568	BT026910	Gasterosteus aculeatus clone CFW98-B08 mRNA sequence	-1.014	0.002083	ARPC1A		ARPC1A		actin related protein 2/3 complex subunit 1A	Extracellular Space	other
	TC138970	BT026910	Gasterosteus aculeatus clone CFW98-B08 mRNA sequence	-1.056	0.010909	ARPC1A		ARPC1A		actin related protein 2/3 complex subunit 1A	Extracellular Space	other
	TC136471	BT058997	Salmo salar clone ssal-rgf-518-332 Arrestin domain-containing protein 3 putative mRNA complete cds	1.987	2.5e-05	ARRDC3		ARRDC3	1.785	arrestin domain containing 3	Plasma Membrane	other
	TC170028	BT058997	Salmo salar clone ssal-rgf-518-332 Arrestin domain-containing protein 3 putative mRNA complete cds	1.694	4.1e-05	ARRDC3		ARRDC3		arrestin domain containing 3	Plasma Membrane	other
	TC144761	BT058997	Salmo salar clone ssal-rgf-518-332 Arrestin domain-containing protein 3 putative mRNA complete cds	1.674	3.6e-05	ARRDC3		ARRDC3		arrestin domain containing 3	Plasma Membrane	other
	TC168156	NM_001124630	Oncorhynchus mykiss Na/K ATPase alpha subunit isoform 3 (atp1a3) mRNA_x0001_gb-AY319388.1- Oncorhynchus mykiss Na/K ATPase alpha subunit isoform 3 mRNA complete cds	1.67	0.029931	ATP1A3		ATP1A3	1.408	ATPase Na+/K+ transporting subunit alpha 3	Plasma Membrane	transporter
	TC153254	NM_001124630	Oncorhynchus mykiss Na/K ATPase alpha subunit isoform 3 (atp1a3) mRNA_x0001_gb-AY319388.1- Oncorhynchus mykiss Na/K ATPase alpha subunit isoform 3 mRNA complete cds	1.146	0.000622	ATP1A3		ATP1A3		ATPase Na+/K+ transporting subunit alpha 3	Plasma Membrane	transporter
	TC146386	BT059325	Salmo salar clone ssal-rgf-541-199 Sodium/potassium-transporting ATPase subunit beta-233 putative mRNA complete cds	1.319	1.8e-05	ATP1B1		ATP1B1	1.2935	ATPase Na+/K+ transporting subunit beta 1	Plasma Membrane	transporter
	TC148965	BT059325	Salmo salar clone ssal-rgf-541-199 Sodium/potassium-transporting ATPase subunit beta-233 putative mRNA complete cds	1.268	0.000471	ATP1B1		ATP1B1		ATPase Na+/K+ transporting subunit beta 1	Plasma Membrane	transporter
	TC160933	not-annotated	not-annotated	-1.433	0.02144	ATRX		ATRX	-1.679	ATRX chromatin remodeler	Nucleus	transcription regulator
	TC166570	NM_200653	Danio rerio alpha thalassemia/mental retardation syndrome X-linked homolog (human) (atrx) mRNA	-1.925	0.001224	ATRX		ATRX		ATRX chromatin remodeler	Nucleus	transcription regulator
	TC170503	BT072728	Salmo salar clone ssal-rgf-538-095 B-cell lymphoma 3-encoded protein putative mRNA pseudogene cds	1.333	0.000912	BCL3		BCL3	1.2685	BCL3 transcription coactivator	Nucleus	transcription regulator
	TC160566	BT072728	Salmo salar clone ssal-rgf-538-095 B-cell lymphoma 3-encoded protein putative mRNA pseudogene cds	1.204	0.000246	BCL3		BCL3		BCL3 transcription coactivator	Nucleus	transcription regulator
	TC132860	NM_001140313	Salmo salar B-cell lymphoma 6 protein homolog (bcl6) mRNA_x0001_gb-BT045633.1- Salmo salar clone ssal-rgf-527-129 B-cell lymphoma 6 protein homolog putative mRNA complete cds	1.409	0.000463	BCL6		BCL6	1.2565	BCL6 transcription repressor	Nucleus	transcription regulator
	TC158857	NM_001140313	Salmo salar B-cell lymphoma 6 protein homolog (bcl6) mRNA_x0001_gb-BT045633.1- Salmo salar clone ssal-rgf-527-129 B-cell lymphoma 6 protein homolog putative mRNA complete cds	1.104	0.002342	BCL6		BCL6		BCL6 transcription repressor	Nucleus	transcription regulator
	TC141686	FJ969490	Salmo salar clone BAC CHORI214-439J08 MHC class I antigen (Sasa-UDA) gene Sasa-UDA*0101 allele complete cds; similar to INSD AY523662 (Sasa-UCA) pseudogene Sasa-UCA*0101 allele complete sequence; PSMB8 (PSMB8) PSMB10 (PSMB10) PSMB9b-like protein (PSMB9b-like protein) PSMB9 (PSMB9) TAP2b (TAP2b) BRD2 (BRD2) and hydroxysteroid (17-beta) dehydrogenase 8 (HSD17B8) genes complete cds; and COLLA2 gene …	1.639	0.034921	BRD2		BRD2	1.337	bromodomain containing 2	Nucleus	kinase
	TC143277	FJ969490	Salmo salar clone BAC CHORI214-439J08 MHC class I antigen (Sasa-UDA) gene Sasa-UDA*0101 allele complete cds; similar to INSD AY523662 (Sasa-UCA) pseudogene Sasa-UCA*0101 allele complete sequence; PSMB8 (PSMB8) PSMB10 (PSMB10) PSMB9b-like protein (PSMB9b-like protein) PSMB9 (PSMB9) TAP2b (TAP2b) BRD2 (BRD2) and hydroxysteroid (17-beta) dehydrogenase 8 (HSD17B8) genes complete cds; and COLLA2 gene …	1.501	0.017707	BRD2		BRD2		bromodomain containing 2	Nucleus	kinase
	TC132410	NM_001124555	Oncorhynchus mykiss BRD2-like (LOC100136302) mRNA_x0001_gb-DQ139863.1- Oncorhynchus mykiss putative BRD2 mRNA complete cds	1.2	0.026604	BRD2		BRD2		bromodomain containing 2	Nucleus	kinase
	TC144336	FJ969490	Salmo salar clone BAC CHORI214-439J08 MHC class I antigen (Sasa-UDA) gene Sasa-UDA*0101 allele complete cds; similar to INSD AY523662 (Sasa-UCA) pseudogene Sasa-UCA*0101 allele complete sequence; PSMB8 (PSMB8) PSMB10 (PSMB10) PSMB9b-like protein (PSMB9b-like protein) PSMB9 (PSMB9) TAP2b (TAP2b) BRD2 (BRD2) and hydroxysteroid (17-beta) dehydrogenase 8 (HSD17B8) genes complete cds; and COLLA2 gene …	1.008	0.003047	BRD2		BRD2		bromodomain containing 2	Nucleus	kinase
	TC143148	BT125239	Salmo salar clone ssal-sjb-001-087 C1orf174 homolog putative mRNA complete cds	1.853	9e-06	C1orf174		C1orf174	1.792	chromosome 1 open reading frame 174	Nucleus	other
	TC139727	BT125239	Salmo salar clone ssal-sjb-001-087 C1orf174 homolog putative mRNA complete cds	1.731	1.5e-05	C1orf174		C1orf174		chromosome 1 open reading frame 174	Nucleus	other
	IMM 449	AJ620466	Oncorhynchus mykiss mRNA for complement receptor-like protein 1 splice variant 2	1.667	0.000927	C4BPA		C4BPA	1.42314	complement component 4 binding protein alpha	Extracellular Space	other
	TC132404	AJ620466	Oncorhynchus mykiss mRNA for complement receptor-like protein 1 splice variant 2	1.634	1.7e-05	C4BPA		C4BPA		complement component 4 binding protein alpha	Extracellular Space	other
	IMM 448	AJ620465	Oncorhynchus mykiss mRNA for complement receptor-like protein 1 splice variant 1	1.586	0.000189	C4BPA		C4BPA		complement component 4 binding protein alpha	Extracellular Space	other
	IMM 448	AJ620465	Oncorhynchus mykiss mRNA for complement receptor-like protein 1 splice variant 1	1.357	0.000938	C4BPA		C4BPA		complement component 4 binding protein alpha	Extracellular Space	other
	IMM 448	AJ620465	Oncorhynchus mykiss mRNA for complement receptor-like protein 1 splice variant 1	1.327	0.000907	C4BPA		C4BPA		complement component 4 binding protein alpha	Extracellular Space	other
	TC157575	AJ620466	Oncorhynchus mykiss mRNA for complement receptor-like protein 1 splice variant 2	1.21	0.002268	C4BPA		C4BPA		complement component 4 binding protein alpha	Extracellular Space	other
	TC132438	AJ620465	Oncorhynchus mykiss mRNA for complement receptor-like protein 1 splice variant 1	1.181	0.000713	C4BPA		C4BPA		complement component 4 binding protein alpha	Extracellular Space	other
	TC132580	NM_001124467	Oncorhynchus mykiss C5a receptor (c5ar) mRNA_x0001_gb-AY366353.1- Oncorhynchus mykiss C5a receptor mRNA complete cds	2.227	0.038242	C5AR1		C5AR1	1.68125	complement C5a receptor 1	Plasma Membrane	G-protein coupled receptor
	IMM 566	NM_001124467	Oncorhynchus mykiss C5a receptor (c5ar) mRNA_x0001_gb-AY366353.1- Oncorhynchus mykiss C5a receptor mRNA complete cds	1.62	0.015024	C5AR1		C5AR1		complement C5a receptor 1	Plasma Membrane	G-protein coupled receptor
	IMM 995	NM_001124467	Oncorhynchus mykiss C5a receptor (c5ar) mRNA_x0001_gb-AY366353.1- Oncorhynchus mykiss C5a receptor mRNA complete cds	1.6	0.004938	C5AR1		C5AR1		complement C5a receptor 1	Plasma Membrane	G-protein coupled receptor
	IMM 446	NM_001124403	Oncorhynchus mykiss C3a anaphylatoxin chemotactic receptor (c3ar1) mRNA_x0001_emb-AJ616902.1- Oncorhynchus mykiss mRNA for c3a anaphylatoxin chemotactic receptor (c3ar1 gene)	1.278	0.007547	C5AR1		C5AR1		complement C5a receptor 1	Plasma Membrane	G-protein coupled receptor
	TC150224	BT044890	Salmo salar clone ssal-rgf-506-272 Calcium/calmodulin-dependent protein kinase II inhibitor 2 putative mRNA complete cds	1.709	0.007137	CAMK2N2		CAMK2N2	1.5575	calcium/calmodulin dependent protein kinase II inhibitor 2	Nucleus	other
	TC149993	BT044890	Salmo salar clone ssal-rgf-506-272 Calcium/calmodulin-dependent protein kinase II inhibitor 2 putative mRNA complete cds	1.406	0.000498	CAMK2N2		CAMK2N2		calcium/calmodulin dependent protein kinase II inhibitor 2	Nucleus	other
	IMM 687	NM_001123573	Salmo salar cathelicidin antimicrobial peptide (LOC100136439) mRNA_x0001_gb-AY360357.1- Salmo salar cathelicidin antimicrobial peptide mRNA complete cds	2.231	0.000633	CAMP		CAMP	2.00667	cathelicidin antimicrobial peptide	Cytoplasm	other
	IMM 687	NM_001123573	Salmo salar cathelicidin antimicrobial peptide (LOC100136439) mRNA_x0001_gb-AY360357.1- Salmo salar cathelicidin antimicrobial peptide mRNA complete cds	2.085	0.001096	CAMP		CAMP		cathelicidin antimicrobial peptide	Cytoplasm	other
	IMM 687	NM_001123573	Salmo salar cathelicidin antimicrobial peptide (LOC100136439) mRNA_x0001_gb-AY360357.1- Salmo salar cathelicidin antimicrobial peptide mRNA complete cds	1.704	0.007743	CAMP		CAMP		cathelicidin antimicrobial peptide	Cytoplasm	other
	TC172513	BT059055	Salmo salar clone ssal-rgf-522-352 Caspase-8 precursor putative mRNA complete cds	1.373	0.000144	CASP10		CASP10	1.258	caspase 10	Cytoplasm	peptidase
	TC169338	not-annotated	not-annotated	1.143	0.000122	CASP10		CASP10		caspase 10	Cytoplasm	peptidase
	IMM 1042	not-annotated	not-annotated	-1.056	0.002591	CCL14		CCL14	-1.31714	C-C motif chemokine ligand 14	Extracellular Space	cytokine
	TC145343	not-annotated	not-annotated	-1.16	0.003219	CCL14		CCL14		C-C motif chemokine ligand 14	Extracellular Space	cytokine
	IMM 1042	not-annotated	not-annotated	-1.164	0.001344	CCL14		CCL14		C-C motif chemokine ligand 14	Extracellular Space	cytokine
	IMM 1042	not-annotated	not-annotated	-1.302	0.001235	CCL14		CCL14		C-C motif chemokine ligand 14	Extracellular Space	cytokine
	IMM 377	not-annotated	not-annotated	-1.355	0.000248	CCL14		CCL14		C-C motif chemokine ligand 14	Extracellular Space	cytokine
	IMM 377	not-annotated	not-annotated	-1.54	0.000252	CCL14		CCL14		C-C motif chemokine ligand 14	Extracellular Space	cytokine
	IMM 377	not-annotated	not-annotated	-1.643	0.000101	CCL14		CCL14		C-C motif chemokine ligand 14	Extracellular Space	cytokine
	TC159768	BT059861	Salmo salar clone ssal-rgg-506-208 C-C motif chemokine 19 precursor putative mRNA complete cds	-2.149	0.00501	CCL19		CCL19	-2.49325	C-C motif chemokine ligand 19	Extracellular Space	cytokine
	IMM 675	BT125229	Salmo salar clone ssal-eve-564-294 C-C motif chemokine 19 precursor putative mRNA complete cds	-2.467	0.000267	CCL19		CCL19		C-C motif chemokine ligand 19	Extracellular Space	cytokine
	IMM 675	BT125229	Salmo salar clone ssal-eve-564-294 C-C motif chemokine 19 precursor putative mRNA complete cds	-2.64	0.000173	CCL19		CCL19		C-C motif chemokine ligand 19	Extracellular Space	cytokine
	IMM 675	BT125229	Salmo salar clone ssal-eve-564-294 C-C motif chemokine 19 precursor putative mRNA complete cds	-2.717	0.000133	CCL19		CCL19		C-C motif chemokine ligand 19	Extracellular Space	cytokine
	IMM 65	NM_001160689	Oncorhynchus mykiss Small inducible cytokine A13 (ccl13) mRNA_x0001_gb-BT073669.1- Oncorhynchus mykiss clone omyk-evo-509-147 Small inducible cytokine A13 precursor putative mRNA complete cds	-1.025	0.005889	CCL7		CCL7	-1.082	C-C motif chemokine ligand 7	Extracellular Space	cytokine
	IMM 65	NM_001160689	Oncorhynchus mykiss Small inducible cytokine A13 (ccl13) mRNA_x0001_gb-BT073669.1- Oncorhynchus mykiss clone omyk-evo-509-147 Small inducible cytokine A13 precursor putative mRNA complete cds	-1.139	0.002862	CCL7		CCL7		C-C motif chemokine ligand 7	Extracellular Space	cytokine
	IMM 878	NM_001124610	Oncorhynchus mykiss chemokine receptor (ccr9) mRNA_x0001_emb-AJ003159.1- Oncorhynchus mykiss mRNA for a chemokine receptor homolog	1.458	0.001038	CCR9		CCR9	1.28446	C-C motif chemokine receptor 9	Plasma Membrane	G-protein coupled receptor
	IMM 100	BT045872	Salmo salar clone ssal-rgf-535-127 C-C chemokine receptor type 9 putative mRNA complete cds	1.43	0.006603	CCR9		CCR9		C-C motif chemokine receptor 9	Plasma Membrane	G-protein coupled receptor
	IMM 100	BT045872	Salmo salar clone ssal-rgf-535-127 C-C chemokine receptor type 9 putative mRNA complete cds	1.424	0.006195	CCR9		CCR9		C-C motif chemokine receptor 9	Plasma Membrane	G-protein coupled receptor
	IMM 99	BT082726	Anoplopoma fimbria clone afim-evh-534-304 C-C chemokine receptor type 9 putative mRNA complete cds	1.408	0.000617	CCR9		CCR9		C-C motif chemokine receptor 9	Plasma Membrane	G-protein coupled receptor
	TC139672	BT082726	Anoplopoma fimbria clone afim-evh-534-304 C-C chemokine receptor type 9 putative mRNA complete cds	1.374	0.002189	CCR9		CCR9		C-C motif chemokine receptor 9	Plasma Membrane	G-protein coupled receptor
	IMM 99	BT082726	Anoplopoma fimbria clone afim-evh-534-304 C-C chemokine receptor type 9 putative mRNA complete cds	1.366	0.001566	CCR9		CCR9		C-C motif chemokine receptor 9	Plasma Membrane	G-protein coupled receptor
	IMM 576	NM_001124610	Oncorhynchus mykiss chemokine receptor (ccr9) mRNA_x0001_emb-AJ003159.1- Oncorhynchus mykiss mRNA for a chemokine receptor homolog	1.341	0.001994	CCR9		CCR9		C-C motif chemokine receptor 9	Plasma Membrane	G-protein coupled receptor
	IMM 576	NM_001124610	Oncorhynchus mykiss chemokine receptor (ccr9) mRNA_x0001_emb-AJ003159.1- Oncorhynchus mykiss mRNA for a chemokine receptor homolog	1.208	0.006828	CCR9		CCR9		C-C motif chemokine receptor 9	Plasma Membrane	G-protein coupled receptor
	TC140267	NM_001124610	Oncorhynchus mykiss chemokine receptor (ccr9) mRNA_x0001_emb-AJ003159.1- Oncorhynchus mykiss mRNA for a chemokine receptor homolog	1.184	0.001853	CCR9		CCR9		C-C motif chemokine receptor 9	Plasma Membrane	G-protein coupled receptor
	IMM 99	BT082726	Anoplopoma fimbria clone afim-evh-534-304 C-C chemokine receptor type 9 putative mRNA complete cds	1.18	0.003866	CCR9		CCR9		C-C motif chemokine receptor 9	Plasma Membrane	G-protein coupled receptor
	IMM 100	BT045872	Salmo salar clone ssal-rgf-535-127 C-C chemokine receptor type 9 putative mRNA complete cds	1.17	0.015237	CCR9		CCR9		C-C motif chemokine receptor 9	Plasma Membrane	G-protein coupled receptor
	IMM 100	BT045872	Salmo salar clone ssal-rgf-535-127 C-C chemokine receptor type 9 putative mRNA complete cds	1.091	0.023308	CCR9		CCR9		C-C motif chemokine receptor 9	Plasma Membrane	G-protein coupled receptor
	IMM 878	NM_001124610	Oncorhynchus mykiss chemokine receptor (ccr9) mRNA_x0001_emb-AJ003159.1- Oncorhynchus mykiss mRNA for a chemokine receptor homolog	1.064	0.009906	CCR9		CCR9		C-C motif chemokine receptor 9	Plasma Membrane	G-protein coupled receptor
	TC134179	GU817336	Salmo salar clone BAC CHORI214-109F19 complete sequence	2.846	2.6e-05	CCRN4L		NOCT	2.429	nocturnin	Nucleus	transcription regulator
	TC142012	CR677175	Tetraodon nigroviridis full-length cDNA	2.483	1e-06	CCRN4L		NOCT		nocturnin	Nucleus	transcription regulator
	TC136356	not-annotated	not-annotated	1.958	7e-06	CCRN4L		NOCT		nocturnin	Nucleus	transcription regulator
	IMM 30	not-annotated	not-annotated	1.375	0.005573	CD22		CD22	1.29467	CD22 molecule	Plasma Membrane	cell surface receptor
	IMM 30	not-annotated	not-annotated	1.278	0.019043	CD22		CD22		CD22 molecule	Plasma Membrane	cell surface receptor
	IMM 30	not-annotated	not-annotated	1.231	0.006108	CD22		CD22		CD22 molecule	Plasma Membrane	cell surface receptor
	IMM 933	NM_001124378	Oncorhynchus mykiss tumour necrosis factor receptor (tnfr) mRNA_x0001_emb-AJ517804.1- Oncorhynchus mykiss mRNA for tumour necrosis factor receptor (tnfr gene)	1.22	0.000206	CD40		CD40	1.1925	CD40 molecule	Plasma Membrane	cell surface receptor
	IMM 933	NM_001124378	Oncorhynchus mykiss tumour necrosis factor receptor (tnfr) mRNA_x0001_emb-AJ517804.1- Oncorhynchus mykiss mRNA for tumour necrosis factor receptor (tnfr gene)	1.165	0.000131	CD40		CD40		CD40 molecule	Plasma Membrane	cell surface receptor
	TC150168	not-annotated	not-annotated	2.708	0.000189	CD55		CD55	1.925	CD55 molecule (Cromer blood group)	Plasma Membrane	other
	IMM 136	AJ620466	Oncorhynchus mykiss mRNA for complement receptor-like protein 1 splice variant 2	2.19	0.011413	CD55		CD55		CD55 molecule (Cromer blood group)	Plasma Membrane	other
	IMM 136	AJ620466	Oncorhynchus mykiss mRNA for complement receptor-like protein 1 splice variant 2	2.069	0.005037	CD55		CD55		CD55 molecule (Cromer blood group)	Plasma Membrane	other
	IMM 136	AJ620466	Oncorhynchus mykiss mRNA for complement receptor-like protein 1 splice variant 2	1.707	0.022542	CD55		CD55		CD55 molecule (Cromer blood group)	Plasma Membrane	other
	IMM 136	AJ620466	Oncorhynchus mykiss mRNA for complement receptor-like protein 1 splice variant 2	1.606	0.038149	CD55		CD55		CD55 molecule (Cromer blood group)	Plasma Membrane	other
	TC132338	NM_001124404	Oncorhynchus mykiss complement receptor-like (LOC100136105) mRNA_x0001_emb-AJ620464.1- Oncorhynchus mykiss mRNA for complement receptor-like protein 1	1.27	0.002037	CD55		CD55		CD55 molecule (Cromer blood group)	Plasma Membrane	other
	TC134971	BT060007	Salmo salar clone ssal-rgg-515-376 Cytidine deaminase putative mRNA complete cds	2.497	2.5e-05	CDA		CDA	1.8855	cytidine deaminase	Nucleus	enzyme
	TC142862	BC164938	Danio rerio zgc:103586 mRNA (cDNA clone MGC:192113 IMAGE:100060422) complete cds	1.274	0.000271	CDA		CDA		cytidine deaminase	Nucleus	enzyme
	IMM 988	NM_001124447	Oncorhynchus mykiss CCAAT/enhancer-binding protein beta (LOC100136165) mRNA_x0001_gb-AY144611.1- Oncorhynchus mykiss CCAAT/enhancer-binding protein beta mRNA complete cds	3.198	0	CEBPB		CEBPB	2.56025	CCAAT enhancer binding protein beta	Nucleus	transcription regulator
	TC166107	NM_001124447	Oncorhynchus mykiss CCAAT/enhancer-binding protein beta (LOC100136165) mRNA_x0001_gb-AY144611.1- Oncorhynchus mykiss CCAAT/enhancer-binding protein beta mRNA complete cds	3.091	0	CEBPB		CEBPB		CCAAT enhancer binding protein beta	Nucleus	transcription regulator
	IMM 988	NM_001124447	Oncorhynchus mykiss CCAAT/enhancer-binding protein beta (LOC100136165) mRNA_x0001_gb-AY144611.1- Oncorhynchus mykiss CCAAT/enhancer-binding protein beta mRNA complete cds	3.044	0	CEBPB		CEBPB		CCAAT enhancer binding protein beta	Nucleus	transcription regulator
	IMM 988	NM_001124447	Oncorhynchus mykiss CCAAT/enhancer-binding protein beta (LOC100136165) mRNA_x0001_gb-AY144611.1- Oncorhynchus mykiss CCAAT/enhancer-binding protein beta mRNA complete cds	2.996	1e-06	CEBPB		CEBPB		CCAAT enhancer binding protein beta	Nucleus	transcription regulator
	TC135368	NM_001172498	Oncorhynchus mykiss CCAAT/enhancer binding protein beta2 (LOC100379112) mRNA_x0001_gb-DQ423470.1- Oncorhynchus mykiss CCAAT/enhancer binding protein beta2 mRNA complete cds	2.981	0	CEBPB		CEBPB		CCAAT enhancer binding protein beta	Nucleus	transcription regulator
	IMM 67	NM_001172498	Oncorhynchus mykiss CCAAT/enhancer binding protein beta2 (LOC100379112) mRNA_x0001_gb-DQ423470.1- Oncorhynchus mykiss CCAAT/enhancer binding protein beta2 mRNA complete cds	2.392	0	CEBPB		CEBPB		CCAAT enhancer binding protein beta	Nucleus	transcription regulator
	IMM 481	AY283059	Oncorhynchus mykiss CCAAT/enhancer binding protein beta (C/EBPbeta) gene complete cds	2.325	0	CEBPB		CEBPB		CCAAT enhancer binding protein beta	Nucleus	transcription regulator
	IMM 481	AY283059	Oncorhynchus mykiss CCAAT/enhancer binding protein beta (C/EBPbeta) gene complete cds	2.27	0	CEBPB		CEBPB		CCAAT enhancer binding protein beta	Nucleus	transcription regulator
	IMM 67	NM_001172498	Oncorhynchus mykiss CCAAT/enhancer binding protein beta2 (LOC100379112) mRNA_x0001_gb-DQ423470.1- Oncorhynchus mykiss CCAAT/enhancer binding protein beta2 mRNA complete cds	2.161	2e-06	CEBPB		CEBPB		CCAAT enhancer binding protein beta	Nucleus	transcription regulator
	IMM 67	NM_001172498	Oncorhynchus mykiss CCAAT/enhancer binding protein beta2 (LOC100379112) mRNA_x0001_gb-DQ423470.1- Oncorhynchus mykiss CCAAT/enhancer binding protein beta2 mRNA complete cds	2.114	2e-06	CEBPB		CEBPB		CCAAT enhancer binding protein beta	Nucleus	transcription regulator
	IMM 481	AY283059	Oncorhynchus mykiss CCAAT/enhancer binding protein beta (C/EBPbeta) gene complete cds	2.08	2e-06	CEBPB		CEBPB		CCAAT enhancer binding protein beta	Nucleus	transcription regulator
	IMM 67	NM_001172498	Oncorhynchus mykiss CCAAT/enhancer binding protein beta2 (LOC100379112) mRNA_x0001_gb-DQ423470.1- Oncorhynchus mykiss CCAAT/enhancer binding protein beta2 mRNA complete cds	2.071	3e-06	CEBPB		CEBPB		CCAAT enhancer binding protein beta	Nucleus	transcription regulator
	TC133394	NM_199628	Danio rerio LAG1 homolog ceramide synthase 5 (S. cerevisiae) (lass5) mRNA_x0001_gb-BC053143.1- Danio rerio LAG1 homolog ceramide synthase 5 (S. cerevisiae) mRNA (cDNA clone MGC:63908 IMAGE:6790306) complete cds	1.768	3e-06	CERS5		CERS5	1.748	ceramide synthase 5	Cytoplasm	transcription regulator
	TC139202	BT027442	Gasterosteus aculeatus clone CFW280-G07 mRNA sequence	1.728	2e-06	CERS5		CERS5		ceramide synthase 5	Cytoplasm	transcription regulator
	IMM 781	AF089860	Oncorhynchus mykiss complement factor Bf-2 mRNA partial cds	-1.302	0.002751	CFB		CFB	-1.50262	complement factor B	Extracellular Space	peptidase
	IMM 781	AF089860	Oncorhynchus mykiss complement factor Bf-2 mRNA partial cds	-1.323	0.001471	CFB		CFB		complement factor B	Extracellular Space	peptidase
	IMM 128	AF089860	Oncorhynchus mykiss complement factor Bf-2 mRNA partial cds	-1.464	0.000588	CFB		CFB		complement factor B	Extracellular Space	peptidase
	IMM 128	AF089860	Oncorhynchus mykiss complement factor Bf-2 mRNA partial cds	-1.5	0.001907	CFB		CFB		complement factor B	Extracellular Space	peptidase
	IMM 128	AF089860	Oncorhynchus mykiss complement factor Bf-2 mRNA partial cds	-1.527	0.002308	CFB		CFB		complement factor B	Extracellular Space	peptidase
	IMM 781	AF089860	Oncorhynchus mykiss complement factor Bf-2 mRNA partial cds	-1.63	0.000765	CFB		CFB		complement factor B	Extracellular Space	peptidase
	IMM 128	AF089860	Oncorhynchus mykiss complement factor Bf-2 mRNA partial cds	-1.636	0.001489	CFB		CFB		complement factor B	Extracellular Space	peptidase
	TC133465	AF089860	Oncorhynchus mykiss complement factor Bf-2 mRNA partial cds	-1.639	0.000539	CFB		CFB		complement factor B	Extracellular Space	peptidase
	TC153071	BT049734	Salmo salar clone ssal-sjb-006-351 Mitochondrial intermembrane space import and assembly protein 40 putative mRNA complete cds	1.334	0.001493	CHCHD4		CHCHD4	1.277	coiled-coil-helix-coiled-coil-helix domain containing 4	Cytoplasm	enzyme
	TC145523	BT049734	Salmo salar clone ssal-sjb-006-351 Mitochondrial intermembrane space import and assembly protein 40 putative mRNA complete cds	1.22	0.000264	CHCHD4		CHCHD4		coiled-coil-helix-coiled-coil-helix domain containing 4	Cytoplasm	enzyme
	IMM 39	NM_001160495	Oncorhynchus mykiss C type lectin receptor B (LOC100301666) mRNA_x0001_gb-FJ607865.1- Oncorhynchus mykiss C type lectin receptor B mRNA complete cds	1.515	1.7e-05	CLEC4E		CLEC4E	1.25317	C-type lectin domain family 4 member E	Plasma Membrane	other
	IMM 1007	NM_001124633	Oncorhynchus mykiss CD209 molecule (cd209) mRNA_x0001_gb-AY593994.1- Oncorhynchus mykiss CD209-like protein (CD209) mRNA complete cds	1.308	0.000111	CLEC4E		CLEC4E		C-type lectin domain family 4 member E	Plasma Membrane	other
	IMM 39	NM_001160495	Oncorhynchus mykiss C type lectin receptor B (LOC100301666) mRNA_x0001_gb-FJ607865.1- Oncorhynchus mykiss C type lectin receptor B mRNA complete cds	1.285	0.000327	CLEC4E		CLEC4E		C-type lectin domain family 4 member E	Plasma Membrane	other
	TC142412	NM_001160495	Oncorhynchus mykiss C type lectin receptor B (LOC100301666) mRNA_x0001_gb-FJ607865.1- Oncorhynchus mykiss C type lectin receptor B mRNA complete cds	1.185	0.000675	CLEC4E		CLEC4E		C-type lectin domain family 4 member E	Plasma Membrane	other
	IMM 1007	NM_001124633	Oncorhynchus mykiss CD209 molecule (cd209) mRNA_x0001_gb-AY593994.1- Oncorhynchus mykiss CD209-like protein (CD209) mRNA complete cds	1.152	0.000245	CLEC4E		CLEC4E		C-type lectin domain family 4 member E	Plasma Membrane	other
	IMM 39	NM_001160495	Oncorhynchus mykiss C type lectin receptor B (LOC100301666) mRNA_x0001_gb-FJ607865.1- Oncorhynchus mykiss C type lectin receptor B mRNA complete cds	1.074	0.001464	CLEC4E		CLEC4E		C-type lectin domain family 4 member E	Plasma Membrane	other
	IMM 827	AF281349	Oncorhynchus mykiss C-type lectin 2-1 mRNA partial cds	1.523	2.8e-05	COLEC12		COLEC12	1.39133	collectin subfamily member 12	Plasma Membrane	cell surface receptor
	IMM 827	AF281349	Oncorhynchus mykiss C-type lectin 2-1 mRNA partial cds	1.396	3.7e-05	COLEC12		COLEC12		collectin subfamily member 12	Plasma Membrane	cell surface receptor
	IMM 827	AF281349	Oncorhynchus mykiss C-type lectin 2-1 mRNA partial cds	1.255	0.000535	COLEC12		COLEC12		collectin subfamily member 12	Plasma Membrane	cell surface receptor
	TC146008	U19370	Oncorhynchus tschawytscha heat shock protein 30 (HSP30) mRNA complete cds	2.951	1.8e-05	CRYAB		CRYAB	1.65263	crystallin alpha B	Nucleus	other
	TC142591	BT043748	Salmo salar clone HM6_0729 heat-shock protein 30-like mRNA complete cds	1.915	0.000189	CRYAB		CRYAB		crystallin alpha B	Nucleus	other
	IMM 215	BT049609	Salmo salar clone ssal-evd-530-172 Heat shock protein beta-11 putative mRNA complete cds	1.595	0.000508	CRYAB		CRYAB		crystallin alpha B	Nucleus	other
	IMM 215	BT049609	Salmo salar clone ssal-evd-530-172 Heat shock protein beta-11 putative mRNA complete cds	1.572	0.000521	CRYAB		CRYAB		crystallin alpha B	Nucleus	other
	TC149958	BT049609	Salmo salar clone ssal-evd-530-172 Heat shock protein beta-11 putative mRNA complete cds	1.54	0.004894	CRYAB		CRYAB		crystallin alpha B	Nucleus	other
	IMM 215	BT049609	Salmo salar clone ssal-evd-530-172 Heat shock protein beta-11 putative mRNA complete cds	1.441	0.000816	CRYAB		CRYAB		crystallin alpha B	Nucleus	other
	TC134312	BT125509	Salmo salar clone ssal-eve-572-377 Heat shock protein beta-11 putative mRNA complete cds	1.141	0.000778	CRYAB		CRYAB		crystallin alpha B	Nucleus	other
	TC152109	NM_001139610	Salmo salar small heat shock protein-like (hspb6l) mRNA_x0001_gb-BT043544.1- Salmo salar clone HM4_1922 small heat shock protein-like (hspb6l) mRNA complete cds	1.066	0.003391	CRYAB		CRYAB		crystallin alpha B	Nucleus	other
	TC161327	BT059332	Salmo salar clone ssal-rgf-541-370 Carboxy-terminal domain RNA polymerase II polypeptide A small phosphatase 2 putative mRNA complete cds	-1.107	0.000177	CTDSP2		CTDSP2	-1.24533	CTD small phosphatase 2	Nucleus	phosphatase
	TC156374	BT046072	Salmo salar clone ssal-rgf-540-375 Carboxy-terminal domain RNA polymerase II polypeptide A small phosphatase 2 putative mRNA complete cds	-1.289	0.000116	CTDSP2		CTDSP2		CTD small phosphatase 2	Nucleus	phosphatase
	TC166600	BT059332	Salmo salar clone ssal-rgf-541-370 Carboxy-terminal domain RNA polymerase II polypeptide A small phosphatase 2 putative mRNA complete cds	-1.34	0.000934	CTDSP2		CTDSP2		CTD small phosphatase 2	Nucleus	phosphatase
	IMM 585	NM_001195170	Oncorhynchus mykiss IL-6 subfamily cytokine M17 (m17) mRNA_x0001_emb-FM866398.1- Oncorhynchus mykiss mRNA for IL-6 subfamily member M17 (m17 gene)	1.182	0.000179	CTF1		CTF1	1.08433	cardiotrophin 1	Extracellular Space	cytokine
	IMM 585	NM_001195170	Oncorhynchus mykiss IL-6 subfamily cytokine M17 (m17) mRNA_x0001_emb-FM866398.1- Oncorhynchus mykiss mRNA for IL-6 subfamily member M17 (m17 gene)	1.049	0.000766	CTF1		CTF1		cardiotrophin 1	Extracellular Space	cytokine
	IMM 585	NM_001195170	Oncorhynchus mykiss IL-6 subfamily cytokine M17 (m17) mRNA_x0001_emb-FM866398.1- Oncorhynchus mykiss mRNA for IL-6 subfamily member M17 (m17 gene)	1.022	0.002304	CTF1		CTF1		cardiotrophin 1	Extracellular Space	cytokine
	TC137332	NM_001139999	Salmo salar connective tissue growth factor (ctgf) mRNA_x0001_gb-BT045041.1- Salmo salar clone ssal-rgf-510-167 Connective tissue growth factor precursor putative mRNA complete cds	1.384	0.000254	CTGF		CCN2	1.19017	cellular communication network factor 2	Extracellular Space	growth factor
	TC168987	NM_001139999	Salmo salar connective tissue growth factor (ctgf) mRNA_x0001_gb-BT045041.1- Salmo salar clone ssal-rgf-510-167 Connective tissue growth factor precursor putative mRNA complete cds	1.292	0.000572	CTGF		CCN2		cellular communication network factor 2	Extracellular Space	growth factor
	IMM 138	NM_001139999	Salmo salar connective tissue growth factor (ctgf) mRNA_x0001_gb-BT045041.1- Salmo salar clone ssal-rgf-510-167 Connective tissue growth factor precursor putative mRNA complete cds	1.167	0.000557	CTGF		CCN2		cellular communication network factor 2	Extracellular Space	growth factor
	IMM 138	NM_001139999	Salmo salar connective tissue growth factor (ctgf) mRNA_x0001_gb-BT045041.1- Salmo salar clone ssal-rgf-510-167 Connective tissue growth factor precursor putative mRNA complete cds	1.138	0.000839	CTGF		CCN2		cellular communication network factor 2	Extracellular Space	growth factor
	IMM 138	NM_001139999	Salmo salar connective tissue growth factor (ctgf) mRNA_x0001_gb-BT045041.1- Salmo salar clone ssal-rgf-510-167 Connective tissue growth factor precursor putative mRNA complete cds	1.114	0.001316	CTGF		CCN2		cellular communication network factor 2	Extracellular Space	growth factor
	IMM 138	NM_001139999	Salmo salar connective tissue growth factor (ctgf) mRNA_x0001_gb-BT045041.1- Salmo salar clone ssal-rgf-510-167 Connective tissue growth factor precursor putative mRNA complete cds	1.046	0.001477	CTGF		CCN2		cellular communication network factor 2	Extracellular Space	growth factor
	IMM 571	NM_001124533	Oncorhynchus mykiss CTLA4-like protein (LOC100136275) mRNA_x0001_gb-AY789436.1- Oncorhynchus mykiss CTLA4-like protein mRNA complete cds	1.542	0.00011	CTLA4		CTLA4	1.31133	cytotoxic T-lymphocyte associated protein 4	Plasma Membrane	cell surface receptor
	IMM 499	NM_001124533	Oncorhynchus mykiss CTLA4-like protein (LOC100136275) mRNA_x0001_gb-AY789436.1- Oncorhynchus mykiss CTLA4-like protein mRNA complete cds	1.301	0.000564	CTLA4		CTLA4		cytotoxic T-lymphocyte associated protein 4	Plasma Membrane	cell surface receptor
	TC134363	NM_001124533	Oncorhynchus mykiss CTLA4-like protein (LOC100136275) mRNA_x0001_gb-AY789436.1- Oncorhynchus mykiss CTLA4-like protein mRNA complete cds	1.091	0.001176	CTLA4		CTLA4		cytotoxic T-lymphocyte associated protein 4	Plasma Membrane	cell surface receptor
	TC168529	BT058923	Salmo salar clone ssal-rgf-513-297 CTP synthase 1 putative mRNA complete cds	1.408	4.4e-05	CTPS1		CTPS1	1.211	CTP synthase 1	Nucleus	enzyme
	TC168748	BT058923	Salmo salar clone ssal-rgf-513-297 CTP synthase 1 putative mRNA complete cds	1.014	0.000471	CTPS1		CTPS1		CTP synthase 1	Nucleus	enzyme
	IMM 1010	NM_001124495	Oncorhynchus mykiss cathepsin Y (cathy) mRNA_x0001_gb-AY593997.1- Oncorhynchus mykiss cathepsin Y (CathY) mRNA complete cds	1.122	0.009828	CTSZ		CTSZ	1.114	cathepsin Z	Cytoplasm	peptidase
	IMM 1010	NM_001124495	Oncorhynchus mykiss cathepsin Y (cathy) mRNA_x0001_gb-AY593997.1- Oncorhynchus mykiss cathepsin Y (CathY) mRNA complete cds	1.106	0.010513	CTSZ		CTSZ		cathepsin Z	Cytoplasm	peptidase
	IMM 897	NM_001124521	Oncorhynchus mykiss myc-regulated DEAD box protein (LOC100136257) mRNA_x0001_gb-AY614597.1- Oncorhynchus mykiss myc-regulated DEAD box protein mRNA complete cds	3.885	1e-06	CXCL2		CXCL2	3.28914	C-X-C motif chemokine ligand 2	Extracellular Space	cytokine
	IMM 547	NM_001124521	Oncorhynchus mykiss myc-regulated DEAD box protein (LOC100136257) mRNA_x0001_gb-AY614597.1- Oncorhynchus mykiss myc-regulated DEAD box protein mRNA complete cds	3.777	0	CXCL2		CXCL2		C-X-C motif chemokine ligand 2	Extracellular Space	cytokine
	IMM 897	NM_001124521	Oncorhynchus mykiss myc-regulated DEAD box protein (LOC100136257) mRNA_x0001_gb-AY614597.1- Oncorhynchus mykiss myc-regulated DEAD box protein mRNA complete cds	3.704	1e-06	CXCL2		CXCL2		C-X-C motif chemokine ligand 2	Extracellular Space	cytokine
	IMM 547	NM_001124521	Oncorhynchus mykiss myc-regulated DEAD box protein (LOC100136257) mRNA_x0001_gb-AY614597.1- Oncorhynchus mykiss myc-regulated DEAD box protein mRNA complete cds	3.57	3e-06	CXCL2		CXCL2		C-X-C motif chemokine ligand 2	Extracellular Space	cytokine
	IMM 547	NM_001124521	Oncorhynchus mykiss myc-regulated DEAD box protein (LOC100136257) mRNA_x0001_gb-AY614597.1- Oncorhynchus mykiss myc-regulated DEAD box protein mRNA complete cds	3.52	1e-06	CXCL2		CXCL2		C-X-C motif chemokine ligand 2	Extracellular Space	cytokine
	IMM 897	NM_001124521	Oncorhynchus mykiss myc-regulated DEAD box protein (LOC100136257) mRNA_x0001_gb-AY614597.1- Oncorhynchus mykiss myc-regulated DEAD box protein mRNA complete cds	3.481	3e-06	CXCL2		CXCL2		C-X-C motif chemokine ligand 2	Extracellular Space	cytokine
	TC155613	AY160981	Oncorhynchus mykiss interleukin-8 (IL-8) mRNA IL-8-nL allele complete cds	3.238	1e-06	CXCL2		CXCL2		C-X-C motif chemokine ligand 2	Extracellular Space	cytokine
	IMM 890	AJ279069	Oncorhynchus mykiss mRNA for putative interleukin 8 (IL-8 gene)	3.144	1.1e-05	CXCL2		CXCL2		C-X-C motif chemokine ligand 2	Extracellular Space	cytokine
	CUST_106_PI420312184	NM_001124521	Oncorhynchus mykiss myc-regulated DEAD box protein (LOC100136257) mRNA_x0001_gb-AY614597.1- Oncorhynchus mykiss myc-regulated DEAD box protein mRNA complete cds	3.144	1.3e-05	CXCL2		CXCL2		C-X-C motif chemokine ligand 2	Extracellular Space	cytokine
	IMM 890	AJ279069	Oncorhynchus mykiss mRNA for putative interleukin 8 (IL-8 gene)	3.137	9e-06	CXCL2		CXCL2		C-X-C motif chemokine ligand 2	Extracellular Space	cytokine
	IMM 1056	NM_001124521	Oncorhynchus mykiss myc-regulated DEAD box protein (LOC100136257) mRNA_x0001_gb-AY614597.1- Oncorhynchus mykiss myc-regulated DEAD box protein mRNA complete cds	2.971	1.2e-05	CXCL2		CXCL2		C-X-C motif chemokine ligand 2	Extracellular Space	cytokine
	IMM 890	AJ279069	Oncorhynchus mykiss mRNA for putative interleukin 8 (IL-8 gene)	2.954	7e-05	CXCL2		CXCL2		C-X-C motif chemokine ligand 2	Extracellular Space	cytokine
	IMM 1056	NM_001124521	Oncorhynchus mykiss myc-regulated DEAD box protein (LOC100136257) mRNA_x0001_gb-AY614597.1- Oncorhynchus mykiss myc-regulated DEAD box protein mRNA complete cds	2.802	3.1e-05	CXCL2		CXCL2		C-X-C motif chemokine ligand 2	Extracellular Space	cytokine
	IMM 1056	NM_001124521	Oncorhynchus mykiss myc-regulated DEAD box protein (LOC100136257) mRNA_x0001_gb-AY614597.1- Oncorhynchus mykiss myc-regulated DEAD box protein mRNA complete cds	2.721	4.1e-05	CXCL2		CXCL2		C-X-C motif chemokine ligand 2	Extracellular Space	cytokine
	TC132449	AF260960	Oncorhynchus mykiss clone HC IL-8 receptor (IL-8R) mRNA complete cds	2.105	2.4e-05	CXCR1		CXCR1	2.0255	C-X-C motif chemokine receptor 1	Plasma Membrane	G-protein coupled receptor
	CUST_104_PI420312184	NM_001124279	Oncorhynchus mykiss interleukin 8 receptor (il8r) mRNA_x0001_gb-AF260964.1- Oncorhynchus mykiss clone AR IL-8 receptor (IL-8R) mRNA complete cds	1.946	1.7e-05	CXCR1		CXCR1		C-X-C motif chemokine receptor 1	Plasma Membrane	G-protein coupled receptor
	IMM 803	AF260966	Oncorhynchus mykiss clone OSU IL-8 receptor (IL-8R) mRNA complete cds	2.688	5e-06	CXCR2		CXCR2	2.387	C-X-C motif chemokine receptor 2	Plasma Membrane	G-protein coupled receptor
	IMM 803	AF260966	Oncorhynchus mykiss clone OSU IL-8 receptor (IL-8R) mRNA complete cds	2.448	1e-06	CXCR2		CXCR2		C-X-C motif chemokine receptor 2	Plasma Membrane	G-protein coupled receptor
	IMM 803	AF260966	Oncorhynchus mykiss clone OSU IL-8 receptor (IL-8R) mRNA complete cds	2.025	2.9e-05	CXCR2		CXCR2		C-X-C motif chemokine receptor 2	Plasma Membrane	G-protein coupled receptor
	TC161616	BT060355	Salmo salar clone ssal-rgh-516-216 C-X-C chemokine receptor type 4 putative mRNA complete cds	1.706	0.000288	CXCR4		CXCR4	1.35867	C-X-C motif chemokine receptor 4	Plasma Membrane	G-protein coupled receptor
	IMM 1060	NM_001124342	Oncorhynchus mykiss CXC chemokine receptor (LOC100136014) mRNA_x0001_emb-AJ001039.1- Oncorhynchus mykiss mRNA for CXC chemokine receptor	1.701	2.2e-05	CXCR4		CXCR4		C-X-C motif chemokine receptor 4	Plasma Membrane	G-protein coupled receptor
	IMM 1060	NM_001124342	Oncorhynchus mykiss CXC chemokine receptor (LOC100136014) mRNA_x0001_emb-AJ001039.1- Oncorhynchus mykiss mRNA for CXC chemokine receptor	1.488	0.000313	CXCR4		CXCR4		C-X-C motif chemokine receptor 4	Plasma Membrane	G-protein coupled receptor
	IMM 1060	NM_001124342	Oncorhynchus mykiss CXC chemokine receptor (LOC100136014) mRNA_x0001_emb-AJ001039.1- Oncorhynchus mykiss mRNA for CXC chemokine receptor	1.439	0.000437	CXCR4		CXCR4		C-X-C motif chemokine receptor 4	Plasma Membrane	G-protein coupled receptor
	IMM 98	BT060355	Salmo salar clone ssal-rgh-516-216 C-X-C chemokine receptor type 4 putative mRNA complete cds	1.316	0.000435	CXCR4		CXCR4		C-X-C motif chemokine receptor 4	Plasma Membrane	G-protein coupled receptor
	TC137588	NM_001124342	Oncorhynchus mykiss CXC chemokine receptor (LOC100136014) mRNA_x0001_emb-AJ001039.1- Oncorhynchus mykiss mRNA for CXC chemokine receptor	1.22	0.000378	CXCR4		CXCR4		C-X-C motif chemokine receptor 4	Plasma Membrane	G-protein coupled receptor
	TC144930	BT060355	Salmo salar clone ssal-rgh-516-216 C-X-C chemokine receptor type 4 putative mRNA complete cds	1.191	0.000588	CXCR4		CXCR4		C-X-C motif chemokine receptor 4	Plasma Membrane	G-protein coupled receptor
	IMM 98	BT060355	Salmo salar clone ssal-rgh-516-216 C-X-C chemokine receptor type 4 putative mRNA complete cds	1.14	0.003471	CXCR4		CXCR4		C-X-C motif chemokine receptor 4	Plasma Membrane	G-protein coupled receptor
	IMM 98	BT060355	Salmo salar clone ssal-rgh-516-216 C-X-C chemokine receptor type 4 putative mRNA complete cds	1.027	0.00427	CXCR4		CXCR4		C-X-C motif chemokine receptor 4	Plasma Membrane	G-protein coupled receptor
	TC159941	BT074009	Oncorhynchus mykiss clone omyk-evo-512-283 Cytochrome c putative mRNA complete cds	2.113	2.2e-05	CYCS		CYCS	1.45733	cytochrome c, somatic	Cytoplasm	transporter
	TC149200	BT074244	Oncorhynchus mykiss clone omyk-evo-501-069 Cytochrome c putative mRNA complete cds	1.166	0.000388	CYCS		CYCS		cytochrome c, somatic	Cytoplasm	transporter
	IMM 152	BT074244	Oncorhynchus mykiss clone omyk-evo-501-069 Cytochrome c putative mRNA complete cds	1.093	0.000342	CYCS		CYCS		cytochrome c, somatic	Cytoplasm	transporter
	TC138642	not-annotated	not-annotated	-1.063	0.00498	CYP2J2		CYP2J2	-1.1845	cytochrome P450 family 2 subfamily J member 2	Cytoplasm	enzyme
	TC140399	AF256707	Salmo salar clone BHMS377 microsatellite sequence	-1.306	0.000271	CYP2J2		CYP2J2		cytochrome P450 family 2 subfamily J member 2	Cytoplasm	enzyme
	TC144600	NM_001139977	Salmo salar CEF-10 (cef10) mRNA_x0001_gb-BT044993.1- Salmo salar clone ssal-rgf-509-110 CEF-10 precursor putative mRNA complete cds	1.161	0.000556	CYR61		CCN1	1.1335	cellular communication network factor 1	Extracellular Space	other
	TC142244	NM_001139977	Salmo salar CEF-10 (cef10) mRNA_x0001_gb-BT044993.1- Salmo salar clone ssal-rgf-509-110 CEF-10 precursor putative mRNA complete cds	1.106	0.000286	CYR61		CCN1		cellular communication network factor 1	Extracellular Space	other
	TC147250	BT050213	Salmo salar clone ssal-eve-507-181 XTP3-transactivated gene A protein homolog putative mRNA complete cds	-1.027	0.001356	DCTPP1		DCTPP1	-1.1075	dCTP pyrophosphatase 1	Cytoplasm	enzyme
	TC170736	BT046525	Salmo salar clone ssal-evf-535-116 XTP3-transactivated gene A protein homolog putative mRNA complete cds	-1.188	0.000264	DCTPP1		DCTPP1		dCTP pyrophosphatase 1	Cytoplasm	enzyme
	TC143816	BT079663	Esox lucius clone eluc-evq-513-292 DNA-damage-inducible transcript 4 protein putative mRNA complete cds	1.728	0.011187	DDIT4		DDIT4	1.5195	DNA damage inducible transcript 4	Cytoplasm	other
	TC134704	BT079663	Esox lucius clone eluc-evq-513-292 DNA-damage-inducible transcript 4 protein putative mRNA complete cds	1.311	0.024757	DDIT4		DDIT4		DNA damage inducible transcript 4	Cytoplasm	other
	IMM 507	NM_001124575	Oncorhynchus mykiss DNA-damage-inducible transcript 4-like (ddit4l) mRNA_x0001_gb-DQ400410.1- Oncorhynchus mykiss DNA-damage-inducible transcript 4-like (DDIT4L) mRNA complete cds	1.619	0.000459	DDIT4L		DDIT4L	1.49625	DNA damage inducible transcript 4 like	Cytoplasm	other
	IMM 507	NM_001124575	Oncorhynchus mykiss DNA-damage-inducible transcript 4-like (ddit4l) mRNA_x0001_gb-DQ400410.1- Oncorhynchus mykiss DNA-damage-inducible transcript 4-like (DDIT4L) mRNA complete cds	1.611	0.000239	DDIT4L		DDIT4L		DNA damage inducible transcript 4 like	Cytoplasm	other
	TC132437	NM_001124575	Oncorhynchus mykiss DNA-damage-inducible transcript 4-like (ddit4l) mRNA_x0001_gb-DQ400410.1- Oncorhynchus mykiss DNA-damage-inducible transcript 4-like (DDIT4L) mRNA complete cds	1.416	0.000259	DDIT4L		DDIT4L		DNA damage inducible transcript 4 like	Cytoplasm	other
	IMM 507	NM_001124575	Oncorhynchus mykiss DNA-damage-inducible transcript 4-like (ddit4l) mRNA_x0001_gb-DQ400410.1- Oncorhynchus mykiss DNA-damage-inducible transcript 4-like (DDIT4L) mRNA complete cds	1.339	0.00127	DDIT4L		DDIT4L		DNA damage inducible transcript 4 like	Cytoplasm	other
	TC145888	NM_001126423	Danio rerio DEAD (Asp-Glu-Ala-Asp) box polypeptide 3 (ddx3) mRNA	1.444	1.4e-05	DDX3X		DDX3X	1.2775	DEAD-box helicase 3 X-linked	Cytoplasm	enzyme
	TC138840	NM_001126423	Danio rerio DEAD (Asp-Glu-Ala-Asp) box polypeptide 3 (ddx3) mRNA	1.111	0.000272	DDX3X		DDX3X		DEAD-box helicase 3 X-linked	Cytoplasm	enzyme
	TC168618	BT059556	Salmo salar clone ssal-rgf-516-259 Probable ATP-dependent RNA helicase DDX5 putative mRNA complete cds	2.035	1e-06	DDX5		DDX5	1.64033	DEAD-box helicase 5	Nucleus	enzyme
	TC162787	BT059556	Salmo salar clone ssal-rgf-516-259 Probable ATP-dependent RNA helicase DDX5 putative mRNA complete cds	1.977	0.000737	DDX5		DDX5		DEAD-box helicase 5	Nucleus	enzyme
	TC162719	BT059556	Salmo salar clone ssal-rgf-516-259 Probable ATP-dependent RNA helicase DDX5 putative mRNA complete cds	1.822	3e-06	DDX5		DDX5		DEAD-box helicase 5	Nucleus	enzyme
	TC166162	BT059556	Salmo salar clone ssal-rgf-516-259 Probable ATP-dependent RNA helicase DDX5 putative mRNA complete cds	1.609	7e-06	DDX5		DDX5		DEAD-box helicase 5	Nucleus	enzyme
	TC148668	BT072475	Salmo salar clone ssal-rgf-527-027 Probable ATP-dependent RNA helicase DDX5 putative mRNA partial cds	1.317	0.031017	DDX5		DDX5		DEAD-box helicase 5	Nucleus	enzyme
	TC155538	BT072475	Salmo salar clone ssal-rgf-527-027 Probable ATP-dependent RNA helicase DDX5 putative mRNA partial cds	1.082	0.016974	DDX5		DDX5		DEAD-box helicase 5	Nucleus	enzyme
	TC142494	BT056612	Salmo salar clone ssal-rgb2-559-019 Dehydrogenase/reductase SDR family member 13 precursor putative mRNA complete cds	-1.046	0.000306	DHRS13		DHRS13	-1.291	dehydrogenase/reductase 13	Other	enzyme
	TC165102	BT056612	Salmo salar clone ssal-rgb2-559-019 Dehydrogenase/reductase SDR family member 13 precursor putative mRNA complete cds	-1.222	0.000551	DHRS13		DHRS13		dehydrogenase/reductase 13	Other	enzyme
	TC147576	BT049948	Salmo salar clone ssal-eve-555-185 Dehydrogenase/reductase SDR family member 13 precursor putative mRNA complete cds	-1.605	0.004983	DHRS13		DHRS13		dehydrogenase/reductase 13	Other	enzyme
	TC169650	NM_001173729	Salmo salar Short-chain dehydrogenase/reductase 3 (dhrs3) mRNA_x0001_gb-BT059354.1- Salmo salar clone ssal-rgf-520-139 Short-chain dehydrogenase/reductase 3 putative mRNA complete cds	-1.11	0.008047	DHRS3		DHRS3	-1.2735	dehydrogenase/reductase 3	Cytoplasm	enzyme
	TC137447	NM_001173729	Salmo salar Short-chain dehydrogenase/reductase 3 (dhrs3) mRNA_x0001_gb-BT059354.1- Salmo salar clone ssal-rgf-520-139 Short-chain dehydrogenase/reductase 3 putative mRNA complete cds	-1.437	0.007442	DHRS3		DHRS3		dehydrogenase/reductase 3	Cytoplasm	enzyme
	TC135236	NM_001140049	Salmo salar dyskeratosis congenita 1 dyskerin (dkc1) mRNA_x0001_gb-BT045139.1- Salmo salar clone ssal-rgf-513-095 H/ACA ribonucleoprotein complex subunit 4 putative mRNA complete cds	1.447	1.7e-05	DKC1		DKC1	1.31875	dyskerin pseudouridine synthase 1	Nucleus	enzyme
	TC140862	NM_001140049	Salmo salar dyskeratosis congenita 1 dyskerin (dkc1) mRNA_x0001_gb-BT045139.1- Salmo salar clone ssal-rgf-513-095 H/ACA ribonucleoprotein complex subunit 4 putative mRNA complete cds	1.445	0.000103	DKC1		DKC1		dyskerin pseudouridine synthase 1	Nucleus	enzyme
	TC154008	NM_001140049	Salmo salar dyskeratosis congenita 1 dyskerin (dkc1) mRNA_x0001_gb-BT045139.1- Salmo salar clone ssal-rgf-513-095 H/ACA ribonucleoprotein complex subunit 4 putative mRNA complete cds	1.197	0.000133	DKC1		DKC1		dyskerin pseudouridine synthase 1	Nucleus	enzyme
	TC146336	NM_001140049	Salmo salar dyskeratosis congenita 1 dyskerin (dkc1) mRNA_x0001_gb-BT045139.1- Salmo salar clone ssal-rgf-513-095 H/ACA ribonucleoprotein complex subunit 4 putative mRNA complete cds	1.186	8.8e-05	DKC1		DKC1		dyskerin pseudouridine synthase 1	Nucleus	enzyme
	IMM 299	CR729718	Tetraodon nigroviridis full-length cDNA	-1.257	0.00078	DUSP22		DUSP22	-1.30967	dual specificity phosphatase 22	Cytoplasm	phosphatase
	IMM 299	CR729718	Tetraodon nigroviridis full-length cDNA	-1.332	0.000201	DUSP22		DUSP22		dual specificity phosphatase 22	Cytoplasm	phosphatase
	IMM 299	CR729718	Tetraodon nigroviridis full-length cDNA	-1.34	0.000113	DUSP22		DUSP22		dual specificity phosphatase 22	Cytoplasm	phosphatase
	TC142013	NM_001141605	Salmo salar Dynein light chain 2 cytoplasmic (dyl2) mRNA_x0001_gb-BT050320.1- Salmo salar clone ssal-evd-552-248 Dynein light chain 2 cytoplasmic putative mRNA complete cds	-1.06	0.00687	DYNLL2		DYNLL2	-1.7485	dynein light chain LC8-type 2	Cytoplasm	other
	TC149310	BT047272	Salmo salar clone ssal-eve-503-354 Dynein light chain 1 cytoplasmic putative mRNA complete cds	-2.437	0.03065	DYNLL2		DYNLL2		dynein light chain LC8-type 2	Cytoplasm	other
	TC139172	NM_001140142	Salmo salar EH-domain containing 3 (ehd3) mRNA_x0001_gb-BT045311.1- Salmo salar clone ssal-rgf-518-062 EH domain-containing protein 3 putative mRNA complete cds	1.343	0.000228	EHD3		EHD3	1.341	EH domain containing 3	Cytoplasm	other
	TC158758	NM_001140142	Salmo salar EH-domain containing 3 (ehd3) mRNA_x0001_gb-BT045311.1- Salmo salar clone ssal-rgf-518-062 EH domain-containing protein 3 putative mRNA complete cds	1.339	6.7e-05	EHD3		EHD3		EH domain containing 3	Cytoplasm	other
	TC132607	NM_001140183	Salmo salar Eukaryotic translation initiation factor 2 subunit 1 (if2a) mRNA_x0001_gb-BT045385.1- Salmo salar clone ssal-rgf-519-365 Eukaryotic translation initiation factor 2 subunit 1 putative mRNA complete cds	1.511	8.5e-05	EIF2S1		EIF2S1	1.4145	eukaryotic translation initiation factor 2 subunit alpha	Cytoplasm	translation regulator
	TC158799	NM_001140183	Salmo salar Eukaryotic translation initiation factor 2 subunit 1 (if2a) mRNA_x0001_gb-BT045385.1- Salmo salar clone ssal-rgf-519-365 Eukaryotic translation initiation factor 2 subunit 1 putative mRNA complete cds	1.318	0.000243	EIF2S1		EIF2S1		eukaryotic translation initiation factor 2 subunit alpha	Cytoplasm	translation regulator
	TC163641	BT072636	Salmo salar clone ssal-rgf-534-103 Eukaryotic translation initiation factor 4 gamma 1 putative mRNA partial cds	1.422	7e-05	EIF4G1		EIF4G1	1.353	eukaryotic translation initiation factor 4 gamma 1	Cytoplasm	translation regulator
	TC161522	BT072636	Salmo salar clone ssal-rgf-534-103 Eukaryotic translation initiation factor 4 gamma 1 putative mRNA partial cds	1.284	5.2e-05	EIF4G1		EIF4G1		eukaryotic translation initiation factor 4 gamma 1	Cytoplasm	translation regulator
	TC143685	not-annotated	not-annotated	1.412	1.4e-05	ELAC1		ELAC1	1.253	elaC ribonuclease Z 1	Nucleus	enzyme
	TC137897	not-annotated	not-annotated	1.3	0.000259	ELAC1		ELAC1		elaC ribonuclease Z 1	Nucleus	enzyme
	TC139725	not-annotated	not-annotated	1.047	0.0062	ELAC1		ELAC1		elaC ribonuclease Z 1	Nucleus	enzyme
	TC139255	not-annotated	not-annotated	2.24	0	ELOVL1		ELOVL1	1.85367	ELOVL fatty acid elongase 1	Cytoplasm	enzyme
	TC150028	NM_001146393	Salmo salar Elongation of very long chain fatty acids protein 1 (elov1) mRNA_x0001_gb-BT056536.1- Salmo salar clone ssal-evf-543-268 Elongation of very long chain fatty acids protein 1 putative mRNA complete cds	1.843	2e-05	ELOVL1		ELOVL1		ELOVL fatty acid elongase 1	Cytoplasm	enzyme
	TC140097	NM_213416	Danio rerio elongation of very long chain fatty acids (FEN1/Elo2 SUR4/Elo3 yeast)-like 1b (elovl1b) mRNA_x0001_gb-BC049330.1- Danio rerio elongation of very long chain fatty acids (FEN1/Elo2 SUR4/Elo3 yeast)-like 1b mRNA (cDNA clone MGC:56567 IMAGE:5914824) complete cds	1.478	1.1e-05	ELOVL1		ELOVL1		ELOVL fatty acid elongase 1	Cytoplasm	enzyme
	TC145746	BT074577	Osmerus mordax clone omor-eva-515-289 Eukaryotic peptide chain release factor subunit 1 putative mRNA complete cds	1.404	0.005074	ETF1		ETF1	1.29	eukaryotic translation termination factor 1	Cytoplasm	translation regulator
	TC151091	BT074577	Osmerus mordax clone omor-eva-515-289 Eukaryotic peptide chain release factor subunit 1 putative mRNA complete cds	1.176	0.022859	ETF1		ETF1		eukaryotic translation termination factor 1	Cytoplasm	translation regulator
	TC154041	NM_001140089	Salmo salar v-ets erythroblastosis virus E26 oncogene homolog 2 (avian) (ets2) mRNA_x0001_gb-BT045218.1- Salmo salar clone ssal-rgf-515-168 C-ets-2 putative mRNA complete cds	2.122	4e-06	ETS2		ETS2	1.9375	ETS proto-oncogene 2, transcription factor	Nucleus	transcription regulator
	TC161588	NM_001140089	Salmo salar v-ets erythroblastosis virus E26 oncogene homolog 2 (avian) (ets2) mRNA_x0001_gb-BT045218.1- Salmo salar clone ssal-rgf-515-168 C-ets-2 putative mRNA complete cds	1.753	3e-05	ETS2		ETS2		ETS proto-oncogene 2, transcription factor	Nucleus	transcription regulator
	TC168725	NM_001141201	Salmo salar Exosome complex exonuclease MTR3 (exos6) mRNA_x0001_gb-BT048637.2- Salmo salar clone ssal-rgb2-530-129 Exosome complex exonuclease MTR3 putative mRNA complete cds	1.664	8.3e-05	EXOSC6		EXOSC6	1.26833	exosome component 6	Nucleus	other
	TC142315	NM_001141201	Salmo salar Exosome complex exonuclease MTR3 (exos6) mRNA_x0001_gb-BT048637.2- Salmo salar clone ssal-rgb2-530-129 Exosome complex exonuclease MTR3 putative mRNA complete cds	1.088	0.000605	EXOSC6		EXOSC6		exosome component 6	Nucleus	other
	TC161194	NM_001141201	Salmo salar Exosome complex exonuclease MTR3 (exos6) mRNA_x0001_gb-BT048637.2- Salmo salar clone ssal-rgb2-530-129 Exosome complex exonuclease MTR3 putative mRNA complete cds	1.053	0.0009	EXOSC6		EXOSC6		exosome component 6	Nucleus	other
	TC135948	NM_001140517	Salmo salar Proteinase-activated receptor 2 (par2) mRNA_x0001_gb-FJ184032.1- Salmo salar proteinase-activated receptor-2b (PAR-2) mRNA complete cds	1.888	0.022048	F2RL1		F2RL1	1.4885	F2R like trypsin receptor 1	Plasma Membrane	G-protein coupled receptor
	TC147260	NM_001140517	Salmo salar Proteinase-activated receptor 2 (par2) mRNA_x0001_gb-FJ184032.1- Salmo salar proteinase-activated receptor-2b (PAR-2) mRNA complete cds	1.089	0.000638	F2RL1		F2RL1		F2R like trypsin receptor 1	Plasma Membrane	G-protein coupled receptor
	IMM 892	NM_001124358	Oncorhynchus mykiss tissue factor (tf) mRNA_x0001_emb-AJ295167.2- Oncorhynchus mykiss mRNA for tissue factor (tf gene)	1.933	5e-06	F3		F3	1.73367	coagulation factor III, tissue factor	Plasma Membrane	cell surface receptor
	TC152172	NM_001124358	Oncorhynchus mykiss tissue factor (tf) mRNA_x0001_emb-AJ295167.2- Oncorhynchus mykiss mRNA for tissue factor (tf gene)	1.893	3e-06	F3		F3		coagulation factor III, tissue factor	Plasma Membrane	cell surface receptor
	TC134901	NM_001124358	Oncorhynchus mykiss tissue factor (tf) mRNA_x0001_emb-AJ295167.2- Oncorhynchus mykiss mRNA for tissue factor (tf gene)	1.872	0.00017	F3		F3		coagulation factor III, tissue factor	Plasma Membrane	cell surface receptor
	IMM 892	NM_001124358	Oncorhynchus mykiss tissue factor (tf) mRNA_x0001_emb-AJ295167.2- Oncorhynchus mykiss mRNA for tissue factor (tf gene)	1.776	1.4e-05	F3		F3		coagulation factor III, tissue factor	Plasma Membrane	cell surface receptor
	TC132862	NM_001124358	Oncorhynchus mykiss tissue factor (tf) mRNA_x0001_emb-AJ295167.2- Oncorhynchus mykiss mRNA for tissue factor (tf gene)	1.474	0.000357	F3		F3		coagulation factor III, tissue factor	Plasma Membrane	cell surface receptor
	IMM 892	NM_001124358	Oncorhynchus mykiss tissue factor (tf) mRNA_x0001_emb-AJ295167.2- Oncorhynchus mykiss mRNA for tissue factor (tf gene)	1.454	0.000157	F3		F3		coagulation factor III, tissue factor	Plasma Membrane	cell surface receptor
	TC143221	BT056780	Salmo salar clone ssal-eve-564-305 FAM3C precursor putative mRNA complete cds	-1.105	0.000277	FAM3C		FAM3C	-1.211	FAM3 metabolism regulating signaling molecule C	Extracellular Space	cytokine
	TC133927	BT046831	Salmo salar clone ssal-eve-525-316 FAM3C precursor putative mRNA complete cds	-1.317	0.000108	FAM3C		FAM3C		FAM3 metabolism regulating signaling molecule C	Extracellular Space	cytokine
	TC152757	not-annotated	not-annotated	-1.364	0.003114	FCGBP		FCGBP	-1.7105	Fc fragment of IgG binding protein	Extracellular Space	other
	TC165726	not-annotated	not-annotated	-2.057	8.6e-05	FCGBP		FCGBP		Fc fragment of IgG binding protein	Extracellular Space	other
	TC153421	XM_002665785	PREDICTED: Danio rerio fermitin family member 1 (fermt1) mRNA	2.141	8e-06	FERMT1		FERMT1	1.82	fermitin family member 1	Plasma Membrane	other
	TC143887	XM_002665785	PREDICTED: Danio rerio fermitin family member 1 (fermt1) mRNA	1.499	0.039746	FERMT1		FERMT1		fermitin family member 1	Plasma Membrane	other
	TC165451	BT072030	Salmo salar clone ssal-rgf-508-090 farnesyltransferase/geranylgeranyltransferase type-1 subunit alpha putative mRNA pseudogene cds	1.395	2.9e-05	FNTA		FNTA	1.2415	farnesyltransferase, CAAX box, alpha	Cytoplasm	enzyme
	TC143621	BT072030	Salmo salar clone ssal-rgf-508-090 farnesyltransferase/geranylgeranyltransferase type-1 subunit alpha putative mRNA pseudogene cds	1.088	0.000139	FNTA		FNTA		farnesyltransferase, CAAX box, alpha	Cytoplasm	enzyme
	TC150377	AB111054	Oncorhynchus masou mRNA for c-Fos protein complete cds	3.231	0	FOS		FOS	2.007	Fos proto-oncogene, AP-1 transcription factor subunit	Nucleus	transcription regulator
	IMM 95	AB111054	Oncorhynchus masou mRNA for c-Fos protein complete cds	1.571	0.005711	FOS		FOS		Fos proto-oncogene, AP-1 transcription factor subunit	Nucleus	transcription regulator
	IMM 95	AB111054	Oncorhynchus masou mRNA for c-Fos protein complete cds	1.219	0.001567	FOS		FOS		Fos proto-oncogene, AP-1 transcription factor subunit	Nucleus	transcription regulator
	TC135326	XM_002812167	PREDICTED: Pongo abelii fos-related antigen 2-like (LOC100462426) mRNA	3.438	0.000157	FOSL2		FOSL2	3.10433	FOS like 2, AP-1 transcription factor subunit	Nucleus	transcription regulator
	TC133784	XM_002812167	PREDICTED: Pongo abelii fos-related antigen 2-like (LOC100462426) mRNA	2.944	2e-06	FOSL2		FOSL2		FOS like 2, AP-1 transcription factor subunit	Nucleus	transcription regulator
	TC133953	AC182751	Gasterosteus aculeatus clone VMRC26-154K14 complete sequence	2.931	0	FOSL2		FOSL2		FOS like 2, AP-1 transcription factor subunit	Nucleus	transcription regulator
	TC171322	NM_001124547	Oncorhynchus mykiss ferritin H-1 (LOC100136293) mRNA_x0001_dbj-D86625.1- Oncorhynchus mykiss mRNA for ferritin H-1 complete cds	2.188	0.0181	FTH1		FTH1	1.321	ferritin heavy chain 1	Cytoplasm	enzyme
	TC159694	NM_001124549	Oncorhynchus mykiss ferritin H-3 (LOC100136295) mRNA_x0001_dbj-D86627.1- Oncorhynchus mykiss mRNA for ferritin H-3 complete cds	1.165	0.006771	FTH1		FTH1		ferritin heavy chain 1	Cytoplasm	enzyme
	TC160684	NM_001160521	Oncorhynchus mykiss Ferritin heavy subunit (frih) mRNA_x0001_gb-BT073048.1- Oncorhynchus mykiss clone omyk-evn-507-078 Ferritin heavy subunit putative mRNA complete cds	1.1	0.017372	FTH1		FTH1		ferritin heavy chain 1	Cytoplasm	enzyme
	TC157877	NM_001124548	Oncorhynchus mykiss ferritin H-2 (LOC100136294) mRNA_x0001_dbj-D86626.1- Oncorhynchus mykiss mRNA for ferritin H-2 complete cds	1.09	0.001789	FTH1		FTH1		ferritin heavy chain 1	Cytoplasm	enzyme
	TC157555	NM_001124548	Oncorhynchus mykiss ferritin H-2 (LOC100136294) mRNA_x0001_dbj-D86626.1- Oncorhynchus mykiss mRNA for ferritin H-2 complete cds	1.062	0.020676	FTH1		FTH1		ferritin heavy chain 1	Cytoplasm	enzyme
	TC169115	BT058833	Salmo salar clone ssal-rgf-506-046 Ras GTPase-activating protein-binding protein 2 putative mRNA complete cds	1.561	0.010513	G3BP2		G3BP2	1.4115	G3BP stress granule assembly factor 2	Cytoplasm	enzyme
	TC146467	NM_001141803	Salmo salar GTPase activating protein (SH3 domain) binding protein 2 (g3bp2) mRNA_x0001_gb-BT045877.1- Salmo salar clone ssal-rgf-535-191 Ras GTPase-activating protein-binding protein 2 putative mRNA complete cds	1.262	0.001437	G3BP2		G3BP2		G3BP stress granule assembly factor 2	Cytoplasm	enzyme
	IMM 562	NM_001124446	Oncorhynchus mykiss glycogen synthase kinase binding protein (gbp) mRNA_x0001_gb-AY103470.1- Oncorhynchus mykiss guanylate-binding protein mRNA complete cds	-1.134	0.017855	GBP1		GBP1	-1.351	guanylate binding protein 1	Cytoplasm	enzyme
	IMM 478	NM_001124446	Oncorhynchus mykiss glycogen synthase kinase binding protein (gbp) mRNA_x0001_gb-AY103470.1- Oncorhynchus mykiss guanylate-binding protein mRNA complete cds	-1.256	0.002997	GBP1		GBP1		guanylate binding protein 1	Cytoplasm	enzyme
	IMM 562	NM_001124446	Oncorhynchus mykiss glycogen synthase kinase binding protein (gbp) mRNA_x0001_gb-AY103470.1- Oncorhynchus mykiss guanylate-binding protein mRNA complete cds	-1.473	0.009552	GBP1		GBP1		guanylate binding protein 1	Cytoplasm	enzyme
	IMM 478	NM_001124446	Oncorhynchus mykiss glycogen synthase kinase binding protein (gbp) mRNA_x0001_gb-AY103470.1- Oncorhynchus mykiss guanylate-binding protein mRNA complete cds	-1.541	0.00278	GBP1		GBP1		guanylate binding protein 1	Cytoplasm	enzyme
	IMM 206	NM_001124446	Oncorhynchus mykiss glycogen synthase kinase binding protein (gbp) mRNA_x0001_gb-AY103470.1- Oncorhynchus mykiss guanylate-binding protein mRNA complete cds	-1.132	0.01131	GBP3		GBP3	-1.3364	guanylate binding protein 3	Cytoplasm	enzyme
	IMM 265	NM_001124446	Oncorhynchus mykiss glycogen synthase kinase binding protein (gbp) mRNA_x0001_gb-AY103470.1- Oncorhynchus mykiss guanylate-binding protein mRNA complete cds	-1.235	0.009671	GBP3		GBP3		guanylate binding protein 3	Cytoplasm	enzyme
	IMM 206	NM_001124446	Oncorhynchus mykiss glycogen synthase kinase binding protein (gbp) mRNA_x0001_gb-AY103470.1- Oncorhynchus mykiss guanylate-binding protein mRNA complete cds	-1.242	0.011265	GBP3		GBP3		guanylate binding protein 3	Cytoplasm	enzyme
	IMM 265	NM_001124446	Oncorhynchus mykiss glycogen synthase kinase binding protein (gbp) mRNA_x0001_gb-AY103470.1- Oncorhynchus mykiss guanylate-binding protein mRNA complete cds	-1.444	0.018922	GBP3		GBP3		guanylate binding protein 3	Cytoplasm	enzyme
	IMM 206	NM_001124446	Oncorhynchus mykiss glycogen synthase kinase binding protein (gbp) mRNA_x0001_gb-AY103470.1- Oncorhynchus mykiss guanylate-binding protein mRNA complete cds	-1.629	0.000612	GBP3		GBP3		guanylate binding protein 3	Cytoplasm	enzyme
	TC148381	NM_001173943	Salmo salar Glutamate--cysteine ligase regulatory subunit (gsh0) mRNA_x0001_gb-BT059343.1- Salmo salar clone ssal-rgf-504-291 Glutamate--cysteine ligase regulatory subunit putative mRNA complete cds	1.337	0.000813	GCLM		GCLM	1.2515	glutamate-cysteine ligase modifier subunit	Cytoplasm	enzyme
	TC144556	NM_001173943	Salmo salar Glutamate--cysteine ligase regulatory subunit (gsh0) mRNA_x0001_gb-BT059343.1- Salmo salar clone ssal-rgf-504-291 Glutamate--cysteine ligase regulatory subunit putative mRNA complete cds	1.166	0.0014	GCLM		GCLM		glutamate-cysteine ligase modifier subunit	Cytoplasm	enzyme
	TC145718	NM_001173827	Salmo salar CQ039 protein (cq039) mRNA_x0001_gb-BT059597.1- Salmo salar clone ssal-rgf-532-113 C17orf39 homolog putative mRNA complete cds	2.151	0.03824	GID4		GID4	1.6575	GID complex subunit 4 homolog	Nucleus	other
	TC132564	NM_001173827	Salmo salar CQ039 protein (cq039) mRNA_x0001_gb-BT059597.1- Salmo salar clone ssal-rgf-532-113 C17orf39 homolog putative mRNA complete cds	1.164	0.000655	GID4		GID4		GID complex subunit 4 homolog	Nucleus	other
	TC164697	not-annotated	not-annotated	-2.204	0.045156	GIMAP7		GIMAP7	-2.524	GTPase, IMAP family member 7	Cytoplasm	enzyme
	TC141721	BT058820	Salmo salar clone ssal-rgf-505-123 Neurogenic differentiation factor 1 putative mRNA complete cds	-2.493	0.000237	GIMAP7		GIMAP7		GTPase, IMAP family member 7	Cytoplasm	enzyme
	TC135335	BT057717	Salmo salar clone ssal-evd-520-231 GTPase IMAP family member 7 putative mRNA complete cds	-2.875	4e-06	GIMAP7		GIMAP7		GTPase, IMAP family member 7	Cytoplasm	enzyme
	TC159194	XM_688079	PREDICTED: Danio rerio glutaminase b (glsb) mRNA	1.928	2e-06	GLS		GLS	1.5805	glutaminase	Cytoplasm	enzyme
	TC150991	XM_002191412	PREDICTED: Taeniopygia guttata glutaminase C (LOC100231894) mRNA	1.233	0.01581	GLS		GLS		glutaminase	Cytoplasm	enzyme
	TC166223	BT074263	Oncorhynchus mykiss clone omyk-evo-505-320 Histone H5A putative mRNA complete cds	-1.814	1.2e-05	H1F0		H1-0	-2.093	H1.0 linker histone	Nucleus	other
	TC147113	BT074263	Oncorhynchus mykiss clone omyk-evo-505-320 Histone H5A putative mRNA complete cds	-1.922	1e-05	H1F0		H1-0		H1.0 linker histone	Nucleus	other
	TC141718	BT074330	Oncorhynchus mykiss clone omyk-evo-501-252 Histone H5A putative mRNA complete cds	-2.205	6e-06	H1F0		H1-0		H1.0 linker histone	Nucleus	other
	TC142939	BT073136	Oncorhynchus mykiss clone omyk-evn-503-031 Histone H5A putative mRNA complete cds	-2.431	1e-06	H1F0		H1-0		H1.0 linker histone	Nucleus	other
	TC146793	BT073775	Oncorhynchus mykiss clone omyk-evo-514-199 Histone H1x putative mRNA complete cds	-1.125	0.000561	H1FX		H1-10	-1.196	H1.10 linker histone	Nucleus	other
	TC138538	BT073775	Oncorhynchus mykiss clone omyk-evo-514-199 Histone H1x putative mRNA complete cds	-1.267	0.000108	H1FX		H1-10		H1.10 linker histone	Nucleus	other
	TC148656	BT060197	Salmo salar clone ssal-rgh-508-250 Histone H3.3 putative mRNA complete cds	1.462	0.006121	H3F3A		H3-3A/H3-3B	1.18933	H3.3 histone A	Nucleus	other
	TC135731	BT073171	Oncorhynchus mykiss clone omyk-evn-510-375 Histone H3.3 putative mRNA complete cds	1.099	6.8e-05	H3F3A		H3-3A/H3-3B		H3.3 histone A	Nucleus	other
	IMM 233	BT073171	Oncorhynchus mykiss clone omyk-evn-510-375 Histone H3.3 putative mRNA complete cds	1.007	0.000156	H3F3A		H3-3A/H3-3B		H3.3 histone A	Nucleus	other
	IMM 234	BT074263	Oncorhynchus mykiss clone omyk-evo-505-320 Histone H5A putative mRNA complete cds	-1.626	4.2e-05	H5A		-	-1.69433	-	-	-
	IMM 234	BT074263	Oncorhynchus mykiss clone omyk-evo-505-320 Histone H5A putative mRNA complete cds	-1.645	2.5e-05	H5A		-		-	-	-
	IMM 234	BT074263	Oncorhynchus mykiss clone omyk-evo-505-320 Histone H5A putative mRNA complete cds	-1.812	9e-06	H5A		-		-	-	-
	IMM 831	AF281354	Oncorhynchus mykiss putative hepcidin antibacterial peptide mRNA partial cds	1.964	0.012661	HAMP		HAMP	1.784	hepcidin antimicrobial peptide	Extracellular Space	other
	IMM 831	AF281354	Oncorhynchus mykiss putative hepcidin antibacterial peptide mRNA partial cds	1.604	0.00721	HAMP		HAMP		hepcidin antimicrobial peptide	Extracellular Space	other
	IMM 238	NM_001124288	Oncorhynchus mykiss hypoxia-inducible factor 1 alpha (hif-1a) mRNA_x0001_gb-AF304864.1-AF304864 Oncorhynchus mykiss hypoxia-inducible factor 1 alpha (HIF-1a) mRNA complete cds	1.153	0.000389	HIF1A		HIF1A	1.118	hypoxia inducible factor 1 subunit alpha	Nucleus	transcription regulator
	TC168871	BT072233	Salmo salar clone ssal-rgf-517-341 Hypoxia-inducible factor 1 alpha putative mRNA partial cds	1.123	0.000547	HIF1A		HIF1A		hypoxia inducible factor 1 subunit alpha	Nucleus	transcription regulator
	TC150125	not-annotated	not-annotated	1.078	0.001141	HIF1A		HIF1A		hypoxia inducible factor 1 subunit alpha	Nucleus	transcription regulator
	TC155732	BT046987	Salmo salar clone ssal-eve-563-197 Heme oxygenase putative mRNA complete cds	2.147	7.8e-05	HMOX1		HMOX1	1.9965	heme oxygenase 1	Cytoplasm	enzyme
	TC144540	BT046987	Salmo salar clone ssal-eve-563-197 Heme oxygenase putative mRNA complete cds	1.846	3.2e-05	HMOX1		HMOX1		heme oxygenase 1	Cytoplasm	enzyme
	TC133427	BT044656	Salmo salar clone ssal-rgf-002-074 Heterogeneous nuclear ribonucleoprotein A0 putative mRNA complete cds	1.154	0.002185	HNRNPA0		HNRNPA0	1.0785	heterogeneous nuclear ribonucleoprotein A0	Nucleus	other
	TC158541	BT044656	Salmo salar clone ssal-rgf-002-074 Heterogeneous nuclear ribonucleoprotein A0 putative mRNA complete cds	1.003	0.000146	HNRNPA0		HNRNPA0		heterogeneous nuclear ribonucleoprotein A0	Nucleus	other
	TC163932	NM_001173702	Salmo salar Heat shock protein HSP 90-alpha (hs90a) mRNA_x0001_gb-BT059272.1- Salmo salar clone ssal-rgf-537-361 Heat shock protein HSP 90-alpha putative mRNA complete cds	1.389	0.000737	HSP90AA1		HSP90AA1	1.16867	heat shock protein 90 alpha family class A member 1	Cytoplasm	enzyme
	TC136379	U89945	Oncorhynchus tshawytscha heat shock protein hsp90 mRNA complete cds	1.079	0.003467	HSP90AA1		HSP90AA1		heat shock protein 90 alpha family class A member 1	Cytoplasm	enzyme
	TC145126	U89945	Oncorhynchus tshawytscha heat shock protein hsp90 mRNA complete cds	1.038	0.024631	HSP90AA1		HSP90AA1		heat shock protein 90 alpha family class A member 1	Cytoplasm	enzyme
	TC141848	NM_001173702	Salmo salar Heat shock protein HSP 90-alpha (hs90a) mRNA_x0001_gb-BT059272.1- Salmo salar clone ssal-rgf-537-361 Heat shock protein HSP 90-alpha putative mRNA complete cds	1.384	0.000222	HSP90AB1		HSP90AB1	1.193	heat shock protein 90 alpha family class B member 1	Cytoplasm	enzyme
	TC132347	NM_001124591	Oncorhynchus mykiss heat shock 90kDa protein 1 beta isoform b (hsp90bb) mRNA_x0001_dbj-AB196458.1- Oncorhynchus mykiss HSP90BB mRNA for heat shock 90kDa protein 1 beta isoform b complete cds	1.182	0.000103	HSP90AB1		HSP90AB1		heat shock protein 90 alpha family class B member 1	Cytoplasm	enzyme
	TC155694	U89945	Oncorhynchus tshawytscha heat shock protein hsp90 mRNA complete cds	1.013	0.035021	HSP90AB1		HSP90AB1		heat shock protein 90 alpha family class B member 1	Cytoplasm	enzyme
	IMM 1068	K02549	Rainbow trout 70 kd heat shock protein mRNA clone pTHS70.7	1.509	0.002061	HSPA1B		HSPA1A/HSPA1B	1.42567	heat shock protein family A (Hsp70) member 1A	Cytoplasm	enzyme
	IMM 1068	K02549	Rainbow trout 70 kd heat shock protein mRNA clone pTHS70.7	1.498	0.002352	HSPA1B		HSPA1A/HSPA1B		heat shock protein family A (Hsp70) member 1A	Cytoplasm	enzyme
	IMM 1068	K02549	Rainbow trout 70 kd heat shock protein mRNA clone pTHS70.7	1.27	0.006254	HSPA1B		HSPA1A/HSPA1B		heat shock protein family A (Hsp70) member 1A	Cytoplasm	enzyme
	TC147116	BT072374	Salmo salar clone ssal-rgf-523-005 Heat shock 70 kDa protein 4 putative mRNA partial cds	1.501	0.000231	HSPA4		HSPA4	1.33067	heat shock protein family A (Hsp70) member 4	Cytoplasm	other
	IMM 216	BT072374	Salmo salar clone ssal-rgf-523-005 Heat shock 70 kDa protein 4 putative mRNA partial cds	1.428	4.7e-05	HSPA4		HSPA4		heat shock protein family A (Hsp70) member 4	Cytoplasm	other
	IMM 216	BT072374	Salmo salar clone ssal-rgf-523-005 Heat shock 70 kDa protein 4 putative mRNA partial cds	1.063	0.000613	HSPA4		HSPA4		heat shock protein family A (Hsp70) member 4	Cytoplasm	other
	TC132380	AB196459	Oncorhynchus mykiss GRP78 mRNA for glucose-regulated protein 78kDa partial cds	1.48	0.006121	HSPA5		HSPA5	1.162	heat shock protein family A (Hsp70) member 5	Cytoplasm	enzyme
	IMM 211	AB196459	Oncorhynchus mykiss GRP78 mRNA for glucose-regulated protein 78kDa partial cds	1.005	0.005302	HSPA5		HSPA5		heat shock protein family A (Hsp70) member 5	Cytoplasm	enzyme
	IMM 211	AB196459	Oncorhynchus mykiss GRP78 mRNA for glucose-regulated protein 78kDa partial cds	1.001	0.004613	HSPA5		HSPA5		heat shock protein family A (Hsp70) member 5	Cytoplasm	enzyme
	TC164426	BT072169	Salmo salar clone ssal-rgf-514-349 Stress-70 protein mitochondrial precursor putative mRNA partial cds	2.625	0.009635	HSPA9		HSPA9	1.55125	heat shock protein family A (Hsp70) member 9	Cytoplasm	other
	TC158230	BT072169	Salmo salar clone ssal-rgf-514-349 Stress-70 protein mitochondrial precursor putative mRNA partial cds	1.268	4.8e-05	HSPA9		HSPA9		heat shock protein family A (Hsp70) member 9	Cytoplasm	other
	TC138974	BT072169	Salmo salar clone ssal-rgf-514-349 Stress-70 protein mitochondrial precursor putative mRNA partial cds	1.204	0.00011	HSPA9		HSPA9		heat shock protein family A (Hsp70) member 9	Cytoplasm	other
	TC162569	BT059314	Salmo salar clone ssal-rgf-540-298 Stress-70 protein mitochondrial precursor putative mRNA complete cds	1.108	0.012461	HSPA9		HSPA9		heat shock protein family A (Hsp70) member 9	Cytoplasm	other
	TC146024	BT071923	Salmo salar clone ssal-rgf-504-002 60 kDa heat shock protein mitochondrial precursor putative mRNA partial cds	1.497	0.000211	HSPD1		HSPD1	1.34867	heat shock protein family D (Hsp60) member 1	Cytoplasm	enzyme
	TC162374	BT044886	Salmo salar clone ssal-rgf-506-231 60 kDa heat shock protein mitochondrial precursor putative mRNA complete cds	1.426	0.018607	HSPD1		HSPD1		heat shock protein family D (Hsp60) member 1	Cytoplasm	enzyme
	TC161889	BT059657	Salmo salar clone ssal-rgf-502-172 60 kDa heat shock protein mitochondrial precursor putative mRNA complete cds	1.123	0.000344	HSPD1		HSPD1		heat shock protein family D (Hsp60) member 1	Cytoplasm	enzyme
	IMM 891	NM_001124613	Oncorhynchus mykiss interferon inducible protein (iip) mRNA_x0001_emb-AJ291989.1- Oncorhynchus Mykiss mRNA for interferon inducible protein (IIP gene)	2.073	1.1e-05	IFITM5		IFITM5	1.42282	interferon induced transmembrane protein 5	Plasma Membrane	other
	IMM 891	NM_001124613	Oncorhynchus mykiss interferon inducible protein (iip) mRNA_x0001_emb-AJ291989.1- Oncorhynchus Mykiss mRNA for interferon inducible protein (IIP gene)	1.898	2.5e-05	IFITM5		IFITM5		interferon induced transmembrane protein 5	Plasma Membrane	other
	IMM 891	NM_001124613	Oncorhynchus mykiss interferon inducible protein (iip) mRNA_x0001_emb-AJ291989.1- Oncorhynchus Mykiss mRNA for interferon inducible protein (IIP gene)	1.748	0.000181	IFITM5		IFITM5		interferon induced transmembrane protein 5	Plasma Membrane	other
	IMM 746	BT073834	Oncorhynchus mykiss clone omyk-evo-501-202 Interferon-inducible protein putative mRNA complete cds	1.576	0.001379	IFITM5		IFITM5		interferon induced transmembrane protein 5	Plasma Membrane	other
	IMM 746	BT073834	Oncorhynchus mykiss clone omyk-evo-501-202 Interferon-inducible protein putative mRNA complete cds	1.529	0.005319	IFITM5		IFITM5		interferon induced transmembrane protein 5	Plasma Membrane	other
	IMM 746	BT073834	Oncorhynchus mykiss clone omyk-evo-501-202 Interferon-inducible protein putative mRNA complete cds	1.465	0.005616	IFITM5		IFITM5		interferon induced transmembrane protein 5	Plasma Membrane	other
	TC154576	BT073834	Oncorhynchus mykiss clone omyk-evo-501-202 Interferon-inducible protein putative mRNA complete cds	1.194	0.000243	IFITM5		IFITM5		interferon induced transmembrane protein 5	Plasma Membrane	other
	IMM 259	BT073834	Oncorhynchus mykiss clone omyk-evo-501-202 Interferon-inducible protein putative mRNA complete cds	1.076	0.000523	IFITM5		IFITM5		interferon induced transmembrane protein 5	Plasma Membrane	other
	IMM 923	NM_001124369	Oncorhynchus mykiss interferon inducible protein 2 (iip2) mRNA_x0001_emb-AJ320157.1- Oncorhynchus mykiss mRNA for interferon inducible protein 2 (iip2 gene)	1.046	0.000248	IFITM5		IFITM5		interferon induced transmembrane protein 5	Plasma Membrane	other
	IMM 259	BT073834	Oncorhynchus mykiss clone omyk-evo-501-202 Interferon-inducible protein putative mRNA complete cds	1.044	0.000247	IFITM5		IFITM5		interferon induced transmembrane protein 5	Plasma Membrane	other
	IMM 923	NM_001124369	Oncorhynchus mykiss interferon inducible protein 2 (iip2) mRNA_x0001_emb-AJ320157.1- Oncorhynchus mykiss mRNA for interferon inducible protein 2 (iip2 gene)	1.002	0.000289	IFITM5		IFITM5		interferon induced transmembrane protein 5	Plasma Membrane	other
	IMM 269	BT058907	Salmo salar clone ssal-rgf-512-273 Interferon-related developmental regulator 1 putative mRNA complete cds	1.423	5.7e-05	IFRD1		IFRD1	1.214	interferon related developmental regulator 1	Nucleus	other
	IMM 269	BT058907	Salmo salar clone ssal-rgf-512-273 Interferon-related developmental regulator 1 putative mRNA complete cds	1.143	0.000367	IFRD1		IFRD1		interferon related developmental regulator 1	Nucleus	other
	TC164612	BT058907	Salmo salar clone ssal-rgf-512-273 Interferon-related developmental regulator 1 putative mRNA complete cds	1.076	0.000533	IFRD1		IFRD1		interferon related developmental regulator 1	Nucleus	other
	TC132392	NM_001124560	Oncorhynchus mykiss insulin-like growth factor binding protein 6 (igfbp6) mRNA	1.652	7e-06	IGFBP6		IGFBP6	1.516	insulin like growth factor binding protein 6	Extracellular Space	other
	TC160642	NM_001124560	Oncorhynchus mykiss insulin-like growth factor binding protein 6 (igfbp6) mRNA	1.38	3.2e-05	IGFBP6		IGFBP6		insulin like growth factor binding protein 6	Extracellular Space	other
	TC153055	BT046646	Salmo salar clone ssal-rgb2-562-380 IMM unoglobulin lambda-like polypeptide 1 precursor putative mRNA complete cds	-1.187	0.008981	IGLL5		IGLL1/IGLL5	-1.196	immunoglobulin lambda like polypeptide 1	Plasma Membrane	other
	TC152829	U69987	Oncorhynchus mykiss IMM unoglobulin light chain L2 mRNA complete cds	-1.205	0.007552	IGLL5		IGLL1/IGLL5		immunoglobulin lambda like polypeptide 1	Plasma Membrane	other
	CUST_14_PI425348775	IL-10B	0	2.426	0.008853	IL10		IL10	2.4145	interleukin 10	Extracellular Space	cytokine
	CUST_14_PI425348775	IL-10B	0	2.403	0.033068	IL10		IL10		interleukin 10	Extracellular Space	cytokine
	TC160181	BT047745	Salmo salar clone ssal-eve-544-209 Interleukin-10 receptor beta chain precursor putative mRNA complete cds	2.739	0.024704	IL10RB		IL10RB	1.9565	interleukin 10 receptor subunit beta	Plasma Membrane	cell surface receptor
	CUST_50_PI425348775	CRFB5	0	1.174	0.00041	IL10RB		IL10RB		interleukin 10 receptor subunit beta	Plasma Membrane	cell surface receptor
	IMM 552	NM_001124382	Oncorhynchus mykiss interleukin-11 (il-11) mRNA_x0001_emb-AJ535687.1- Oncorhynchus mykiss mRNA for interleukin-11 (il-11 gene)	2.523	0.035738	IL11		IL11	2.201	interleukin 11	Extracellular Space	cytokine
	TC132334	NM_001124382	Oncorhynchus mykiss interleukin-11 (il-11) mRNA_x0001_emb-AJ535687.1- Oncorhynchus mykiss mRNA for interleukin-11 (il-11 gene)	2.46	4e-06	IL11		IL11		interleukin 11	Extracellular Space	cytokine
	IMM 936	NM_001124382	Oncorhynchus mykiss interleukin-11 (il-11) mRNA_x0001_emb-AJ535687.1- Oncorhynchus mykiss mRNA for interleukin-11 (il-11 gene)	2.172	8e-06	IL11		IL11		interleukin 11	Extracellular Space	cytokine
	IMM 552	NM_001124382	Oncorhynchus mykiss interleukin-11 (il-11) mRNA_x0001_emb-AJ535687.1- Oncorhynchus mykiss mRNA for interleukin-11 (il-11 gene)	2.156	3e-06	IL11		IL11		interleukin 11	Extracellular Space	cytokine
	IMM 936	NM_001124382	Oncorhynchus mykiss interleukin-11 (il-11) mRNA_x0001_emb-AJ535687.1- Oncorhynchus mykiss mRNA for interleukin-11 (il-11 gene)	2.114	3e-05	IL11		IL11		interleukin 11	Extracellular Space	cytokine
	IMM 552	NM_001124382	Oncorhynchus mykiss interleukin-11 (il-11) mRNA_x0001_emb-AJ535687.1- Oncorhynchus mykiss mRNA for interleukin-11 (il-11 gene)	2.051	3.6e-05	IL11		IL11		interleukin 11	Extracellular Space	cytokine
	IMM 936	NM_001124382	Oncorhynchus mykiss interleukin-11 (il-11) mRNA_x0001_emb-AJ535687.1- Oncorhynchus mykiss mRNA for interleukin-11 (il-11 gene)	1.931	0.000277	IL11		IL11		interleukin 11	Extracellular Space	cytokine
	TC132478	NM_001124392	Oncorhynchus mykiss interleukin-12 beta chain (il12b) mRNA_x0001_emb-AJ548829.1- Oncorhynchus mykiss mRNA for interleukin-12 beta chain (il12b gene) large transcript	1.83	0.000157	IL12B		IL12B	1.37725	interleukin 12B	Extracellular Space	cytokine
	IMM 947	NM_001124392	Oncorhynchus mykiss interleukin-12 beta chain (il12b) mRNA_x0001_emb-AJ548829.1- Oncorhynchus mykiss mRNA for interleukin-12 beta chain (il12b gene) large transcript	1.692	1.6e-05	IL12B		IL12B		interleukin 12B	Extracellular Space	cytokine
	TC132513	AJ548830	Oncorhynchus mykiss mRNA for interleukin-12 beta chain (il12b gene) small transcript	1.466	6.4e-05	IL12B		IL12B		interleukin 12B	Extracellular Space	cytokine
	IMM 948	AJ548830	Oncorhynchus mykiss mRNA for interleukin-12 beta chain (il12b gene) small transcript	1.351	0.000202	IL12B		IL12B		interleukin 12B	Extracellular Space	cytokine
	IMM 947	NM_001124392	Oncorhynchus mykiss interleukin-12 beta chain (il12b) mRNA_x0001_emb-AJ548829.1- Oncorhynchus mykiss mRNA for interleukin-12 beta chain (il12b gene) large transcript	1.22	0.001713	IL12B		IL12B		interleukin 12B	Extracellular Space	cytokine
	IMM 947	NM_001124392	Oncorhynchus mykiss interleukin-12 beta chain (il12b) mRNA_x0001_emb-AJ548829.1- Oncorhynchus mykiss mRNA for interleukin-12 beta chain (il12b gene) large transcript	1.177	0.00285	IL12B		IL12B		interleukin 12B	Extracellular Space	cytokine
	IMM 948	AJ548830	Oncorhynchus mykiss mRNA for interleukin-12 beta chain (il12b gene) small transcript	1.147	0.000621	IL12B		IL12B		interleukin 12B	Extracellular Space	cytokine
	IMM 948	AJ548830	Oncorhynchus mykiss mRNA for interleukin-12 beta chain (il12b gene) small transcript	1.135	0.00067	IL12B		IL12B		interleukin 12B	Extracellular Space	cytokine
	TC133989	AJ223954	Oncorhynchus mykiss mRNA for interleukin-1-beta	3.212	0	IL1B		IL1B	2.50067	interleukin 1 beta	Extracellular Space	cytokine
	CUST_86_PI420312184	AJ223954	Oncorhynchus mykiss mRNA for interleukin-1-beta	2.918	1e-06	IL1B		IL1B		interleukin 1 beta	Extracellular Space	cytokine
	IMM 1054	AJ223954	Oncorhynchus mykiss mRNA for interleukin-1-beta	2.472	1e-06	IL1B		IL1B		interleukin 1 beta	Extracellular Space	cytokine
	IMM 883	AJ245925	Oncorhynchus mykiss IL-1 beta 2 gene for interleukin-1 beta 2 precursor exons 1-6	2.429	0.03903	IL1B		IL1B		interleukin 1 beta	Extracellular Space	cytokine
	IMM 1054	AJ223954	Oncorhynchus mykiss mRNA for interleukin-1-beta	2.108	4e-06	IL1B		IL1B		interleukin 1 beta	Extracellular Space	cytokine
	IMM 1054	AJ223954	Oncorhynchus mykiss mRNA for interleukin-1-beta	1.865	5.1e-05	IL1B		IL1B		interleukin 1 beta	Extracellular Space	cytokine
	TC136568	NM_001124355	Oncorhynchus mykiss interleukin-1 receptor type II (il-1rii) mRNA_x0001_emb-AJ276474.2- Oncorhynchus mykiss mRNA for interleukin-1 receptor type II (IL-1rII gene)	2.454	1e-06	IL1R2		IL1R2	2.24425	interleukin 1 receptor type 2	Plasma Membrane	cell surface receptor
	IMM 886	NM_001124355	Oncorhynchus mykiss interleukin-1 receptor type II (il-1rii) mRNA_x0001_emb-AJ276474.2- Oncorhynchus mykiss mRNA for interleukin-1 receptor type II (IL-1rII gene)	2.347	0	IL1R2		IL1R2		interleukin 1 receptor type 2	Plasma Membrane	cell surface receptor
	IMM 886	NM_001124355	Oncorhynchus mykiss interleukin-1 receptor type II (il-1rii) mRNA_x0001_emb-AJ276474.2- Oncorhynchus mykiss mRNA for interleukin-1 receptor type II (IL-1rII gene)	2.236	4e-06	IL1R2		IL1R2		interleukin 1 receptor type 2	Plasma Membrane	cell surface receptor
	IMM 886	NM_001124355	Oncorhynchus mykiss interleukin-1 receptor type II (il-1rii) mRNA_x0001_emb-AJ276474.2- Oncorhynchus mykiss mRNA for interleukin-1 receptor type II (IL-1rII gene)	1.94	3.2e-05	IL1R2		IL1R2		interleukin 1 receptor type 2	Plasma Membrane	cell surface receptor
	TC169313	HM159469	Salmo salar clone BAC 33H18 orphan nuclear receptor Dax-1 (Dax1) gene complete cds; and X-linked interleukin-1 receptor accessory protein-like 1 precursor (IL1RAPL-1) pseudogene complete sequence	2.886	0.029074	IL1RAPL1		IL1RAPL1	2.1745	interleukin 1 receptor accessory protein like 1	Plasma Membrane	cell surface receptor
	TC159985	HM159469	Salmo salar clone BAC 33H18 orphan nuclear receptor Dax-1 (Dax1) gene complete cds; and X-linked interleukin-1 receptor accessory protein-like 1 precursor (IL1RAPL-1) pseudogene complete sequence	1.463	0.000339	IL1RAPL1		IL1RAPL1		interleukin 1 receptor accessory protein like 1	Plasma Membrane	cell surface receptor
	IMM 1052	NM_001124355	Oncorhynchus mykiss interleukin-1 receptor type II (il-1rii) mRNA_x0001_emb-AJ276474.2- Oncorhynchus mykiss mRNA for interleukin-1 receptor type II (IL-1rII gene)	2.687	1e-06	IL1RAPL2		IL1RAPL2	2.60533	interleukin 1 receptor accessory protein like 2	Plasma Membrane	cell surface receptor
	IMM 1052	NM_001124355	Oncorhynchus mykiss interleukin-1 receptor type II (il-1rii) mRNA_x0001_emb-AJ276474.2- Oncorhynchus mykiss mRNA for interleukin-1 receptor type II (IL-1rII gene)	2.686	8e-06	IL1RAPL2		IL1RAPL2		interleukin 1 receptor accessory protein like 2	Plasma Membrane	cell surface receptor
	IMM 1052	NM_001124355	Oncorhynchus mykiss interleukin-1 receptor type II (il-1rii) mRNA_x0001_emb-AJ276474.2- Oncorhynchus mykiss mRNA for interleukin-1 receptor type II (IL-1rII gene)	2.443	1.7e-05	IL1RAPL2		IL1RAPL2		interleukin 1 receptor accessory protein like 2	Plasma Membrane	cell surface receptor
	CUST_46_PI425348775	IL-21Ralpha	0	1.682	1.3e-05	IL21R		IL21R	1.626	interleukin 21 receptor	Plasma Membrane	cell surface receptor
	CUST_46_PI425348775	IL-21Ralpha	0	1.57	3.4e-05	IL21R		IL21R		interleukin 21 receptor	Plasma Membrane	cell surface receptor
	CUST_12_PI425348775	NP_001233270	Oncorhynchus mykiss interleukin 4/13A	-1.027	0.022427	IL4		IL4	-1.0395	interleukin 4	Extracellular Space	cytokine
	CUST_12_PI425348775	NP_001233270	Oncorhynchus mykiss interleukin 4/13A	-1.052	0.006641	IL4		IL4		interleukin 4	Extracellular Space	cytokine
	IMM 438	AJ310565	Oncorhynchus mykiss il-8 gene for putative interleukin 8 exons 1-4	2.35	0.002131	IL8		CXCL8	1.7426	C-X-C motif chemokine ligand 8	Extracellular Space	cytokine
	IMM 901	AJ310565	Oncorhynchus mykiss il-8 gene for putative interleukin 8 exons 1-4	1.854	0.000215	IL8		CXCL8		C-X-C motif chemokine ligand 8	Extracellular Space	cytokine
	IMM 901	AJ310565	Oncorhynchus mykiss il-8 gene for putative interleukin 8 exons 1-4	1.545	0.00837	IL8		CXCL8		C-X-C motif chemokine ligand 8	Extracellular Space	cytokine
	IMM 438	AJ310565	Oncorhynchus mykiss il-8 gene for putative interleukin 8 exons 1-4	1.528	0.002458	IL8		CXCL8		C-X-C motif chemokine ligand 8	Extracellular Space	cytokine
	IMM 991	AY221022	Oncorhynchus mykiss interleukin 8X (IL-8) gene IL-8-X allele complete cds	1.436	0.004063	IL8		CXCL8		C-X-C motif chemokine ligand 8	Extracellular Space	cytokine
	IMM 616	FN806856	Salmo salar mRNA for interferon regulatory factor 1 isoform 2 (IRF1-2 gene)	-1.005	0.000499	IRF1		IRF1	-1.107	interferon regulatory factor 1	Nucleus	transcription regulator
	CUST_117_PI420312184	NM_001124293	Oncorhynchus mykiss interferon regulatory factor 1 (irf-1) mRNA_x0001_gb-AF332147.1- Oncorhynchus mykiss interferon regulatory factor 1 (IRF-1) mRNA complete cds	-1.042	0.000513	IRF1		IRF1		interferon regulatory factor 1	Nucleus	transcription regulator
	IMM 260	FN806856	Salmo salar mRNA for interferon regulatory factor 1 isoform 2 (IRF1-2 gene)	-1.044	0.000408	IRF1		IRF1		interferon regulatory factor 1	Nucleus	transcription regulator
	TC159024	FN806856	Salmo salar mRNA for interferon regulatory factor 1 isoform 2 (IRF1-2 gene)	-1.121	0.000339	IRF1		IRF1		interferon regulatory factor 1	Nucleus	transcription regulator
	TC159407	FN806856	Salmo salar mRNA for interferon regulatory factor 1 isoform 2 (IRF1-2 gene)	-1.129	0.000195	IRF1		IRF1		interferon regulatory factor 1	Nucleus	transcription regulator
	TC170556	FN806856	Salmo salar mRNA for interferon regulatory factor 1 isoform 2 (IRF1-2 gene)	-1.15	0.000234	IRF1		IRF1		interferon regulatory factor 1	Nucleus	transcription regulator
	IMM 616	FN806856	Salmo salar mRNA for interferon regulatory factor 1 isoform 2 (IRF1-2 gene)	-1.175	0.000163	IRF1		IRF1		interferon regulatory factor 1	Nucleus	transcription regulator
	IMM 260	FN806856	Salmo salar mRNA for interferon regulatory factor 1 isoform 2 (IRF1-2 gene)	-1.19	0.000274	IRF1		IRF1		interferon regulatory factor 1	Nucleus	transcription regulator
	IMM 986	NM_001124438	Oncorhynchus mykiss interferon regulatory factor 2 (irf2) mRNA_x0001_gb-AY034055.2- Oncorhynchus mykiss interferon regulatory-factor 2 mRNA complete cds	-1.154	0.022649	IRF2		IRF2	-1.1565	interferon regulatory factor 2	Nucleus	transcription regulator
	CUST_118_PI420312184	NM_001124438	Oncorhynchus mykiss interferon regulatory factor 2 (irf2) mRNA_x0001_gb-AY034055.2- Oncorhynchus mykiss interferon regulatory-factor 2 mRNA complete cds	-1.159	0.000519	IRF2		IRF2		interferon regulatory factor 2	Nucleus	transcription regulator
	TC167917	BC056772	Danio rerio interferon regulatory factor 6 mRNA (cDNA clone MGC:63500 IMAGE:2640695) complete cds	1.497	0.00014	IRF6		IRF6	1.349	interferon regulatory factor 6	Nucleus	transcription regulator
	IMM 970	BC056772	Danio rerio interferon regulatory factor 6 mRNA (cDNA clone MGC:63500 IMAGE:2640695) complete cds	1.201	0.025124	IRF6		IRF6		interferon regulatory factor 6	Nucleus	transcription regulator
	TC132389	NM_001124411	Oncorhynchus mykiss jun proto-oncogene (jun) mRNA_x0001_emb-AJ627207.1- Oncorhynchus mykiss mRNA for transcription factor AP-1 (jun gene)	1.998	4e-06	JUN		JUN	1.55238	Jun proto-oncogene, AP-1 transcription factor subunit	Nucleus	transcription regulator
	IMM 454	NM_001124411	Oncorhynchus mykiss jun proto-oncogene (jun) mRNA_x0001_emb-AJ627207.1- Oncorhynchus mykiss mRNA for transcription factor AP-1 (jun gene)	1.831	1.4e-05	JUN		JUN		Jun proto-oncogene, AP-1 transcription factor subunit	Nucleus	transcription regulator
	TC137999	BT045224	Salmo salar clone ssal-rgf-515-291 Transcription factor AP-1 putative mRNA complete cds	1.747	1.2e-05	JUN		JUN		Jun proto-oncogene, AP-1 transcription factor subunit	Nucleus	transcription regulator
	IMM 454	NM_001124411	Oncorhynchus mykiss jun proto-oncogene (jun) mRNA_x0001_emb-AJ627207.1- Oncorhynchus mykiss mRNA for transcription factor AP-1 (jun gene)	1.643	1e-05	JUN		JUN		Jun proto-oncogene, AP-1 transcription factor subunit	Nucleus	transcription regulator
	TC160860	BT045224	Salmo salar clone ssal-rgf-515-291 Transcription factor AP-1 putative mRNA complete cds	1.441	5.1e-05	JUN		JUN		Jun proto-oncogene, AP-1 transcription factor subunit	Nucleus	transcription regulator
	TC156564	BT045224	Salmo salar clone ssal-rgf-515-291 Transcription factor AP-1 putative mRNA complete cds	1.378	2.5e-05	JUN		JUN		Jun proto-oncogene, AP-1 transcription factor subunit	Nucleus	transcription regulator
	IMM 454	NM_001124411	Oncorhynchus mykiss jun proto-oncogene (jun) mRNA_x0001_emb-AJ627207.1- Oncorhynchus mykiss mRNA for transcription factor AP-1 (jun gene)	1.237	0.000672	JUN		JUN		Jun proto-oncogene, AP-1 transcription factor subunit	Nucleus	transcription regulator
	TC147942	BT045224	Salmo salar clone ssal-rgf-515-291 Transcription factor AP-1 putative mRNA complete cds	1.144	7.3e-05	JUN		JUN		Jun proto-oncogene, AP-1 transcription factor subunit	Nucleus	transcription regulator
	IMM 416	NM_001124520	Oncorhynchus mykiss junB protein (LOC100136256) mRNA_x0001_gb-AY614595.1- Oncorhynchus mykiss junB protein mRNA complete cds	2.222	0	JUNB		JUNB	1.676	JunB proto-oncogene, AP-1 transcription factor subunit	Nucleus	transcription regulator
	IMM 416	NM_001124520	Oncorhynchus mykiss junB protein (LOC100136256) mRNA_x0001_gb-AY614595.1- Oncorhynchus mykiss junB protein mRNA complete cds	2.163	1e-06	JUNB		JUNB		JunB proto-oncogene, AP-1 transcription factor subunit	Nucleus	transcription regulator
	TC132801	NM_001124520	Oncorhynchus mykiss junB protein (LOC100136256) mRNA_x0001_gb-AY614595.1- Oncorhynchus mykiss junB protein mRNA complete cds	1.918	2e-06	JUNB		JUNB		JunB proto-oncogene, AP-1 transcription factor subunit	Nucleus	transcription regulator
	IMM 416	NM_001124520	Oncorhynchus mykiss junB protein (LOC100136256) mRNA_x0001_gb-AY614595.1- Oncorhynchus mykiss junB protein mRNA complete cds	1.826	2e-06	JUNB		JUNB		JunB proto-oncogene, AP-1 transcription factor subunit	Nucleus	transcription regulator
	TC156791	BT026598	Gasterosteus aculeatus clone CEC16-H09 mRNA sequence	1.769	6e-06	JUNB		JUNB		JunB proto-oncogene, AP-1 transcription factor subunit	Nucleus	transcription regulator
	TC160082	CR690290	Tetraodon nigroviridis full-length cDNA	1.733	1.4e-05	JUNB		JUNB		JunB proto-oncogene, AP-1 transcription factor subunit	Nucleus	transcription regulator
	TC148637	DQ285670	Xiphophorus maculatus JUN-B (JunB) gene complete cds	1.534	5.6e-05	JUNB		JUNB		JunB proto-oncogene, AP-1 transcription factor subunit	Nucleus	transcription regulator
	IMM 1050	NM_001124520	Oncorhynchus mykiss junB protein (LOC100136256) mRNA_x0001_gb-AY614595.1- Oncorhynchus mykiss junB protein mRNA complete cds	1.519	1.1e-05	JUNB		JUNB		JunB proto-oncogene, AP-1 transcription factor subunit	Nucleus	transcription regulator
	IMM 1050	NM_001124520	Oncorhynchus mykiss junB protein (LOC100136256) mRNA_x0001_gb-AY614595.1- Oncorhynchus mykiss junB protein mRNA complete cds	1.404	2.8e-05	JUNB		JUNB		JunB proto-oncogene, AP-1 transcription factor subunit	Nucleus	transcription regulator
	TC158779	DQ285670	Xiphophorus maculatus JUN-B (JunB) gene complete cds	1.386	0.000295	JUNB		JUNB		JunB proto-oncogene, AP-1 transcription factor subunit	Nucleus	transcription regulator
	IMM 1050	NM_001124520	Oncorhynchus mykiss junB protein (LOC100136256) mRNA_x0001_gb-AY614595.1- Oncorhynchus mykiss junB protein mRNA complete cds	1.374	2.7e-05	JUNB		JUNB		JunB proto-oncogene, AP-1 transcription factor subunit	Nucleus	transcription regulator
	IMM 493	NM_001124520	Oncorhynchus mykiss junB protein (LOC100136256) mRNA_x0001_gb-AY614595.1- Oncorhynchus mykiss junB protein mRNA complete cds	1.264	1.8e-05	JUNB		JUNB		JunB proto-oncogene, AP-1 transcription factor subunit	Nucleus	transcription regulator
	TC169887	NM_001146353	Salmo salar Krueppel-like factor 2 (klf2) mRNA_x0001_gb-BT044789.1- Salmo salar clone ssal-rgf-503-311 Krueppel-like factor 2 putative mRNA complete cds	1.548	0.000423	KLF2		KLF2	1.4425	Kruppel like factor 2	Nucleus	transcription regulator
	TC149223	NM_001146353	Salmo salar Krueppel-like factor 2 (klf2) mRNA_x0001_gb-BT044789.1- Salmo salar clone ssal-rgf-503-311 Krueppel-like factor 2 putative mRNA complete cds	1.337	0.001656	KLF2		KLF2		Kruppel like factor 2	Nucleus	transcription regulator
	IMM 140	BT049640	Salmo salar clone ssal-eve-543-224 Krueppel-like factor 6 putative mRNA complete cds	1.762	1.4e-05	KLF6		KLF6	1.5342	Kruppel like factor 6	Nucleus	transcription regulator
	IMM 140	BT049640	Salmo salar clone ssal-eve-543-224 Krueppel-like factor 6 putative mRNA complete cds	1.746	2e-05	KLF6		KLF6		Kruppel like factor 6	Nucleus	transcription regulator
	IMM 140	BT049640	Salmo salar clone ssal-eve-543-224 Krueppel-like factor 6 putative mRNA complete cds	1.578	5.1e-05	KLF6		KLF6		Kruppel like factor 6	Nucleus	transcription regulator
	TC147949	BT049640	Salmo salar clone ssal-eve-543-224 Krueppel-like factor 6 putative mRNA complete cds	1.359	8.5e-05	KLF6		KLF6		Kruppel like factor 6	Nucleus	transcription regulator
	IMM 140	BT049640	Salmo salar clone ssal-eve-543-224 Krueppel-like factor 6 putative mRNA complete cds	1.226	0.000267	KLF6		KLF6		Kruppel like factor 6	Nucleus	transcription regulator
	TC158343	BT060257	Salmo salar clone ssal-rgh-511-105 Importin subunit alpha-2 putative mRNA complete cds	-1.014	0.011564	KPNA2		KPNA2	-1.0585	karyopherin subunit alpha 2	Nucleus	transporter
	TC143306	BT060257	Salmo salar clone ssal-rgh-511-105 Importin subunit alpha-2 putative mRNA complete cds	-1.103	0.010302	KPNA2		KPNA2		karyopherin subunit alpha 2	Nucleus	transporter
	TC135240	NM_001124376	Oncorhynchus mykiss keratin 13 (k13) mRNA_x0001_emb-AJ427867.1- Oncorhynchus mykiss mRNA for Keratin 13 (k13 gene)	-1.003	0.007246	KRT16		KRT16	-1.34667	keratin 16	Cytoplasm	other
	TC153711	NM_001124376	Oncorhynchus mykiss keratin 13 (k13) mRNA_x0001_emb-AJ427867.1- Oncorhynchus mykiss mRNA for Keratin 13 (k13 gene)	-1.079	0.001353	KRT16		KRT16		keratin 16	Cytoplasm	other
	TC140692	NM_001124376	Oncorhynchus mykiss keratin 13 (k13) mRNA_x0001_emb-AJ427867.1- Oncorhynchus mykiss mRNA for Keratin 13 (k13 gene)	-1.958	0.000565	KRT16		KRT16		keratin 16	Cytoplasm	other
	TC140043	BC129316	Danio rerio zgc:109868 mRNA (cDNA clone MGC:158600 IMAGE:8159224) complete cds	2.621	5e-06	KRT17		KRT17	1.9085	keratin 17	Cytoplasm	other
	TC135539	NM_001124353	Oncorhynchus mykiss type I keratin E7 (e7) mRNA_x0001_emb-AJ272371.1- Oncorhynchus mykiss mRNA for type I keratin E7 (E7 gene)	1.196	0.000268	KRT17		KRT17		keratin 17	Cytoplasm	other
	TC153905	NM_001123548	Salmo salar hypothetical protein LOC100136396 (LOC100136396) mRNA_x0001_emb-AJ312748.1- Salmo salar hypothetical protein ORF1	-1.285	0.003731	LALBA		LALBA	-1.48033	lactalbumin alpha	Extracellular Space	enzyme
	TC163465	NM_001123548	Salmo salar hypothetical protein LOC100136396 (LOC100136396) mRNA_x0001_emb-AJ312748.1- Salmo salar hypothetical protein ORF1	-1.451	0.00418	LALBA		LALBA		lactalbumin alpha	Extracellular Space	enzyme
	TC142727	NM_001123548	Salmo salar hypothetical protein LOC100136396 (LOC100136396) mRNA_x0001_emb-AJ312748.1- Salmo salar hypothetical protein ORF1	-1.705	0.001929	LALBA		LALBA		lactalbumin alpha	Extracellular Space	enzyme
	TC133909	not-annotated	not-annotated	2.798	1e-06	LAMA3		LAMA3	2.52633	laminin subunit alpha 3	Extracellular Space	other
	TC170679	not-annotated	not-annotated	2.439	0.00014	LAMA3		LAMA3		laminin subunit alpha 3	Extracellular Space	other
	TC169302	XM_690939	PREDICTED: Danio rerio similar to laminin alpha 3 (LOC567640) mRNA	2.342	0.006784	LAMA3		LAMA3		laminin subunit alpha 3	Extracellular Space	other
	IMM 280	NM_001124309	Oncorhynchus mykiss LECT2 neutrophil chemotactic factor (lect2) mRNA_x0001_gb-AF363272.1- Oncorhynchus mykiss LECT2 neutrophil chemotactic factor (LECT2) mRNA complete cds	1.538	0.00116	LECT2		LECT2	1.29067	leukocyte cell derived chemotaxin 2	Extracellular Space	other
	IMM 849	NM_001124309	Oncorhynchus mykiss LECT2 neutrophil chemotactic factor (lect2) mRNA_x0001_gb-AF363272.1- Oncorhynchus mykiss LECT2 neutrophil chemotactic factor (LECT2) mRNA complete cds	1.499	0.000839	LECT2		LECT2		leukocyte cell derived chemotaxin 2	Extracellular Space	other
	IMM 280	NM_001124309	Oncorhynchus mykiss LECT2 neutrophil chemotactic factor (lect2) mRNA_x0001_gb-AF363272.1- Oncorhynchus mykiss LECT2 neutrophil chemotactic factor (LECT2) mRNA complete cds	1.408	0.004705	LECT2		LECT2		leukocyte cell derived chemotaxin 2	Extracellular Space	other
	IMM 737	BT050009	Salmo salar clone ssal-eve-570-356 Leukocyte cell-derived chemotaxin 2 precursor putative mRNA complete cds	1.387	0.006493	LECT2		LECT2		leukocyte cell derived chemotaxin 2	Extracellular Space	other
	TC168846	NM_001124309	Oncorhynchus mykiss LECT2 neutrophil chemotactic factor (lect2) mRNA_x0001_gb-AF363272.1- Oncorhynchus mykiss LECT2 neutrophil chemotactic factor (LECT2) mRNA complete cds	1.368	0.00161	LECT2		LECT2		leukocyte cell derived chemotaxin 2	Extracellular Space	other
	IMM 280	NM_001124309	Oncorhynchus mykiss LECT2 neutrophil chemotactic factor (lect2) mRNA_x0001_gb-AF363272.1- Oncorhynchus mykiss LECT2 neutrophil chemotactic factor (LECT2) mRNA complete cds	1.153	0.023793	LECT2		LECT2		leukocyte cell derived chemotaxin 2	Extracellular Space	other
	TC154068	NM_001124309	Oncorhynchus mykiss LECT2 neutrophil chemotactic factor (lect2) mRNA_x0001_gb-AF363272.1- Oncorhynchus mykiss LECT2 neutrophil chemotactic factor (LECT2) mRNA complete cds	1.115	0.004683	LECT2		LECT2		leukocyte cell derived chemotaxin 2	Extracellular Space	other
	IMM 805	AF271114	Oncorhynchus mykiss chemotaxin mRNA partial cds	1.103	0.005091	LECT2		LECT2		leukocyte cell derived chemotaxin 2	Extracellular Space	other
	IMM 849	NM_001124309	Oncorhynchus mykiss LECT2 neutrophil chemotactic factor (lect2) mRNA_x0001_gb-AF363272.1- Oncorhynchus mykiss LECT2 neutrophil chemotactic factor (LECT2) mRNA complete cds	1.045	0.026153	LECT2		LECT2		leukocyte cell derived chemotaxin 2	Extracellular Space	other
	TC158355	not-annotated	not-annotated	2.017	0	LRRN4		LRRN4	1.747	leucine rich repeat neuronal 4	Plasma Membrane	other
	TC155119	BT125522	Salmo salar clone ssal-rgb2-610-340 fibronectin type-III domain-containing protein UNQ728/PRO1410 homolog precursor putative mRNA complete cds	1.477	0.0005	LRRN4		LRRN4		leucine rich repeat neuronal 4	Plasma Membrane	other
	IMM 466	NM_001124425	Oncorhynchus mykiss lymphotoxin beta 2 (lt-b2) mRNA_x0001_emb-AJ971434.1- Oncorhynchus mykiss mRNA for lymphotoxin beta 2 (lt-b2 gene)	2.256	6e-06	LTB		LTB	1.97267	lymphotoxin beta	Extracellular Space	cytokine
	IMM 466	NM_001124425	Oncorhynchus mykiss lymphotoxin beta 2 (lt-b2) mRNA_x0001_emb-AJ971434.1- Oncorhynchus mykiss mRNA for lymphotoxin beta 2 (lt-b2 gene)	1.907	0.001649	LTB		LTB		lymphotoxin beta	Extracellular Space	cytokine
	IMM 466	NM_001124425	Oncorhynchus mykiss lymphotoxin beta 2 (lt-b2) mRNA_x0001_emb-AJ971434.1- Oncorhynchus mykiss mRNA for lymphotoxin beta 2 (lt-b2 gene)	1.755	0.000135	LTB		LTB		lymphotoxin beta	Extracellular Space	cytokine
	TC135398	not-annotated	not-annotated	1.686	0.000116	LTB4R		LTB4R	1.4005	leukotriene B4 receptor	Plasma Membrane	G-protein coupled receptor
	TC156636	XM_002662721	PREDICTED: Danio rerio leukotriene B4 receptor 1-like (LOC100329657) mRNA	1.115	0.036584	LTB4R		LTB4R		leukotriene B4 receptor	Plasma Membrane	G-protein coupled receptor
	IMM 288	BT060237	Salmo salar clone ssal-rgh-510-202 Lymphatic vessel endothelial hyaluronic acid receptor 1 precursor putative mRNA complete cds	1.538	0.000468	LYVE1		LYVE1	1.3345	lymphatic vessel endothelial hyaluronan receptor 1	Plasma Membrane	cell surface receptor
	IMM 288	BT060237	Salmo salar clone ssal-rgh-510-202 Lymphatic vessel endothelial hyaluronic acid receptor 1 precursor putative mRNA complete cds	1.309	0.000647	LYVE1		LYVE1		lymphatic vessel endothelial hyaluronan receptor 1	Plasma Membrane	cell surface receptor
	IMM 288	BT060237	Salmo salar clone ssal-rgh-510-202 Lymphatic vessel endothelial hyaluronic acid receptor 1 precursor putative mRNA complete cds	1.262	0.002905	LYVE1		LYVE1		lymphatic vessel endothelial hyaluronan receptor 1	Plasma Membrane	cell surface receptor
	TC161513	NM_001141251	Salmo salar Lymphatic vessel endothelial hyaluronic acid receptor 1 (xlkd1) mRNA_x0001_gb-BT048800.1- Salmo salar clone ssal-eve-509-295 Lymphatic vessel endothelial hyaluronic acid receptor 1 precursor putative mRNA complete cds	1.229	0.000619	LYVE1		LYVE1		lymphatic vessel endothelial hyaluronan receptor 1	Plasma Membrane	cell surface receptor
	TC150282	NM_001139612	Salmo salar v-maf musculoaponeurotic fibrosarcoma oncogene-like (maffl) mRNA_x0001_gb-BT043547.1- Salmo salar clone HM4_1986 v-maf musculoaponeurotic fibrosarcoma oncogene-like (maffl) mRNA complete cds	1.252	7.1e-05	MAFF		MAFF	1.15533	MAF bZIP transcription factor F	Nucleus	transcription regulator
	TC136388	NM_001139612	Salmo salar v-maf musculoaponeurotic fibrosarcoma oncogene-like (maffl) mRNA_x0001_gb-BT043547.1- Salmo salar clone HM4_1986 v-maf musculoaponeurotic fibrosarcoma oncogene-like (maffl) mRNA complete cds	1.126	0.000196	MAFF		MAFF		MAF bZIP transcription factor F	Nucleus	transcription regulator
	TC170128	NM_001139612	Salmo salar v-maf musculoaponeurotic fibrosarcoma oncogene-like (maffl) mRNA_x0001_gb-BT043547.1- Salmo salar clone HM4_1986 v-maf musculoaponeurotic fibrosarcoma oncogene-like (maffl) mRNA complete cds	1.088	0.005616	MAFF		MAFF		MAF bZIP transcription factor F	Nucleus	transcription regulator
	TC146978	BT050155	Salmo salar clone ssal-evf-516-263 ARMET precursor putative mRNA complete cds	1.651	0.000174	MANF		MANF	1.539	mesencephalic astrocyte derived neurotrophic factor	Extracellular Space	other
	TC161375	BT050155	Salmo salar clone ssal-evf-516-263 ARMET precursor putative mRNA complete cds	1.571	1.5e-05	MANF		MANF		mesencephalic astrocyte derived neurotrophic factor	Extracellular Space	other
	TC136939	BT050155	Salmo salar clone ssal-evf-516-263 ARMET precursor putative mRNA complete cds	1.395	0.000231	MANF		MANF		mesencephalic astrocyte derived neurotrophic factor	Extracellular Space	other
	TC145319	EU069828	Oncorhynchus mykiss mitogen-activated protein kinase kinase kinase kinase 4-like protein gene partial cds	2.089	1e-06	MAP4K4		MAP4K4	1.59433	mitogen-activated protein kinase kinase kinase kinase 4	Cytoplasm	kinase
	CUST_56_PI420312184	EU069828	Oncorhynchus mykiss mitogen-activated protein kinase kinase kinase kinase 4-like protein gene partial cds	1.411	3.2e-05	MAP4K4		MAP4K4		mitogen-activated protein kinase kinase kinase kinase 4	Cytoplasm	kinase
	TC160173	EU069828	Oncorhynchus mykiss mitogen-activated protein kinase kinase kinase kinase 4-like protein gene partial cds	1.283	5.9e-05	MAP4K4		MAP4K4		mitogen-activated protein kinase kinase kinase kinase 4	Cytoplasm	kinase
	TC163737	AY134883	Mus musculus mitogen-activated protein kinase 6 (Map) gene exon 6 and complete cds	1.932	2e-05	MAPK6		MAPK6	1.627	mitogen-activated protein kinase 6	Cytoplasm	kinase
	TC156262	not-annotated	not-annotated	1.322	0.000264	MAPK6		MAPK6		mitogen-activated protein kinase 6	Cytoplasm	kinase
	TC143529	DQ207960	Paralichthys olivaceus microsatellite OF102 sequence	2.54	0	MARCKSL1		MARCKSL1	2.513	MARCKS like 1	Cytoplasm	other
	TC152134	DQ207960	Paralichthys olivaceus microsatellite OF102 sequence	2.486	0	MARCKSL1		MARCKSL1		MARCKS like 1	Cytoplasm	other
	IMM 1058	BT071873	Salmo salar clone ssal-rgf-501-166 Induced myeloid leukemia cell differentiation protein Mcl-1 putative mRNA pseudogene cds	1.005	0.000896	MCL1		MCL1	1.003	MCL1 apoptosis regulator, BCL2 family member	Cytoplasm	transporter
	IMM 1058	BT071873	Salmo salar clone ssal-rgf-501-166 Induced myeloid leukemia cell differentiation protein Mcl-1 putative mRNA pseudogene cds	1.001	0.000355	MCL1		MCL1		MCL1 apoptosis regulator, BCL2 family member	Cytoplasm	transporter
	TC136425	BT072027	Salmo salar clone ssal-rgf-508-057 DNA replication licensing factor mcm2 putative mRNA partial cds	-1.041	0.040519	MCM2		MCM2	-1.2065	minichromosome maintenance complex component 2	Nucleus	enzyme
	TC165384	BT072027	Salmo salar clone ssal-rgf-508-057 DNA replication licensing factor mcm2 putative mRNA partial cds	-1.171	0.000145	MCM2		MCM2		minichromosome maintenance complex component 2	Nucleus	enzyme
	TC136542	BT072027	Salmo salar clone ssal-rgf-508-057 DNA replication licensing factor mcm2 putative mRNA partial cds	-1.22	0.000705	MCM2		MCM2		minichromosome maintenance complex component 2	Nucleus	enzyme
	TC167129	BT072027	Salmo salar clone ssal-rgf-508-057 DNA replication licensing factor mcm2 putative mRNA partial cds	-1.394	0.000174	MCM2		MCM2		minichromosome maintenance complex component 2	Nucleus	enzyme
	TC149301	NM_001146654	Salmo salar Mediator of RNA polymerase II transcription subunit 19-B (md19b) mRNA_x0001_gb-BT056901.1- Salmo salar clone ssal-eve-528-126 Mediator of RNA polymerase II transcription subunit 19-B putative mRNA complete cds	1.238	0.000151	MED19		MED19	1.153	mediator complex subunit 19	Nucleus	other
	TC169166	NM_001146654	Salmo salar Mediator of RNA polymerase II transcription subunit 19-B (md19b) mRNA_x0001_gb-BT056901.1- Salmo salar clone ssal-eve-528-126 Mediator of RNA polymerase II transcription subunit 19-B putative mRNA complete cds	1.068	0.000786	MED19		MED19		mediator complex subunit 19	Nucleus	other
	TC160786	BT075674	Osmerus mordax clone omor-eva-514-090 Microsomal glutathione S-transferase 1 putative mRNA complete cds	-1.255	0.012982	MGST1		MGST1	-1.31133	microsomal glutathione S-transferase 1	Cytoplasm	enzyme
	TC139201	BT075674	Osmerus mordax clone omor-eva-514-090 Microsomal glutathione S-transferase 1 putative mRNA complete cds	-1.329	0.014085	MGST1		MGST1		microsomal glutathione S-transferase 1	Cytoplasm	enzyme
	TC142126	BT075674	Osmerus mordax clone omor-eva-514-090 Microsomal glutathione S-transferase 1 putative mRNA complete cds	-1.35	0.001062	MGST1		MGST1		microsomal glutathione S-transferase 1	Cytoplasm	enzyme
	TC140314	BT048883	Salmo salar clone ssal-rgb2-629-143 Mid1-interacting protein 1 putative mRNA complete cds	1.121	0.000376	MID1IP1		MID1IP1	1.101	MID1 interacting protein 1	Cytoplasm	other
	TC171336	BT048803	Salmo salar clone ssal-rgb2-624-214 Mid1-interacting protein 1 putative mRNA complete cds	1.081	0.000304	MID1IP1		MID1IP1		MID1 interacting protein 1	Cytoplasm	other
	TC140005	NM_001160666	Oncorhynchus mykiss MKI67 FHA domain-interacting nucleolar phosphoprotein-like (mk67i) mRNA_x0001_gb-BT073583.1- Oncorhynchus mykiss clone omyk-evn-508-198 MKI67 FHA domain-interacting nucleolar phosphoprotein-like putative mRNA complete cds	1.306	0.000141	MKI67IP		NIFK	1.258	nucleolar protein interacting with the FHA domain of MKI67	Nucleus	other
	TC140539	NM_001160666	Oncorhynchus mykiss MKI67 FHA domain-interacting nucleolar phosphoprotein-like (mk67i) mRNA_x0001_gb-BT073583.1- Oncorhynchus mykiss clone omyk-evn-508-198 MKI67 FHA domain-interacting nucleolar phosphoprotein-like putative mRNA complete cds	1.21	4.9e-05	MKI67IP		NIFK		nucleolar protein interacting with the FHA domain of MKI67	Nucleus	other
	IMM 725	BT060383	Salmo salar clone ssal-rgh-518-066 Collagenase 3 precursor putative mRNA complete cds	3.308	0	MMP13		MMP13	2.54787	matrix metallopeptidase 13	Extracellular Space	peptidase
	IMM 725	BT060383	Salmo salar clone ssal-rgh-518-066 Collagenase 3 precursor putative mRNA complete cds	3.147	0	MMP13		MMP13		matrix metallopeptidase 13	Extracellular Space	peptidase
	IMM 725	BT060383	Salmo salar clone ssal-rgh-518-066 Collagenase 3 precursor putative mRNA complete cds	3.096	1e-06	MMP13		MMP13		matrix metallopeptidase 13	Extracellular Space	peptidase
	TC132896	BT060383	Salmo salar clone ssal-rgh-518-066 Collagenase 3 precursor putative mRNA complete cds	2.889	1.1e-05	MMP13		MMP13		matrix metallopeptidase 13	Extracellular Space	peptidase
	TC162883	BT060383	Salmo salar clone ssal-rgh-518-066 Collagenase 3 precursor putative mRNA complete cds	2.757	2e-05	MMP13		MMP13		matrix metallopeptidase 13	Extracellular Space	peptidase
	IMM 879	AJ006411	Oncorhynchus mykiss mRNA for collagenase 3 partial	1.839	6.5e-05	MMP13		MMP13		matrix metallopeptidase 13	Extracellular Space	peptidase
	IMM 879	AJ006411	Oncorhynchus mykiss mRNA for collagenase 3 partial	1.748	3.9e-05	MMP13		MMP13		matrix metallopeptidase 13	Extracellular Space	peptidase
	IMM 879	AJ006411	Oncorhynchus mykiss mRNA for collagenase 3 partial	1.599	0.000163	MMP13		MMP13		matrix metallopeptidase 13	Extracellular Space	peptidase
	TC134331	NM_001124370	Oncorhynchus mykiss matrix metalloproteinase 9 (mmp9) mRNA_x0001_emb-AJ320533.1- Oncorhynchus mykiss mRNA for matrix metalloproteinase 9 (mmp9 gene)	2.436	0.001542	MMP9		MMP9	1.5126	matrix metallopeptidase 9	Extracellular Space	peptidase
	IMM 924	NM_001124370	Oncorhynchus mykiss matrix metalloproteinase 9 (mmp9) mRNA_x0001_emb-AJ320533.1- Oncorhynchus mykiss mRNA for matrix metalloproteinase 9 (mmp9 gene)	1.494	0.000126	MMP9		MMP9		matrix metallopeptidase 9	Extracellular Space	peptidase
	IMM 924	NM_001124370	Oncorhynchus mykiss matrix metalloproteinase 9 (mmp9) mRNA_x0001_emb-AJ320533.1- Oncorhynchus mykiss mRNA for matrix metalloproteinase 9 (mmp9 gene)	1.354	0.000251	MMP9		MMP9		matrix metallopeptidase 9	Extracellular Space	peptidase
	TC132759	NM_001124370	Oncorhynchus mykiss matrix metalloproteinase 9 (mmp9) mRNA_x0001_emb-AJ320533.1- Oncorhynchus mykiss mRNA for matrix metalloproteinase 9 (mmp9 gene)	1.263	0.000685	MMP9		MMP9		matrix metallopeptidase 9	Extracellular Space	peptidase
	IMM 924	NM_001124370	Oncorhynchus mykiss matrix metalloproteinase 9 (mmp9) mRNA_x0001_emb-AJ320533.1- Oncorhynchus mykiss mRNA for matrix metalloproteinase 9 (mmp9 gene)	1.016	0.001771	MMP9		MMP9		matrix metallopeptidase 9	Extracellular Space	peptidase
	TC137047	NM_001141131	Salmo salar myeloid cell leukemia sequence 1b (mcl1b) mRNA_x0001_gb-BT048368.1- Salmo salar clone ssal-rgb2-501-309 L-Myc-1b putative mRNA complete cds	-1.18	0.001876	MYCL1		MYCL	-1.60267	MYCL proto-oncogene, bHLH transcription factor	Nucleus	transcription regulator
	TC147899	NM_001141131	Salmo salar myeloid cell leukemia sequence 1b (mcl1b) mRNA_x0001_gb-BT048368.1- Salmo salar clone ssal-rgb2-501-309 L-Myc-1b putative mRNA complete cds	-1.812	3.6e-05	MYCL1		MYCL		MYCL proto-oncogene, bHLH transcription factor	Nucleus	transcription regulator
	TC143086	NM_001141131	Salmo salar myeloid cell leukemia sequence 1b (mcl1b) mRNA_x0001_gb-BT048368.1- Salmo salar clone ssal-rgb2-501-309 L-Myc-1b putative mRNA complete cds	-1.816	0.009013	MYCL1		MYCL		MYCL proto-oncogene, bHLH transcription factor	Nucleus	transcription regulator
	IMM 327	BT071825	Salmo salar clone ssal-rgf-001-044 Nucleophosmin putative mRNA partial cds	1.496	1.6e-05	NPM1		NPM1	1.35871	nucleophosmin 1	Nucleus	transcription regulator
	TC163491	BT071825	Salmo salar clone ssal-rgf-001-044 Nucleophosmin putative mRNA partial cds	1.453	1.4e-05	NPM1		NPM1		nucleophosmin 1	Nucleus	transcription regulator
	IMM 327	BT071825	Salmo salar clone ssal-rgf-001-044 Nucleophosmin putative mRNA partial cds	1.375	3e-05	NPM1		NPM1		nucleophosmin 1	Nucleus	transcription regulator
	IMM 327	BT071825	Salmo salar clone ssal-rgf-001-044 Nucleophosmin putative mRNA partial cds	1.343	3.6e-05	NPM1		NPM1		nucleophosmin 1	Nucleus	transcription regulator
	TC161664	BT071825	Salmo salar clone ssal-rgf-001-044 Nucleophosmin putative mRNA partial cds	1.315	0.000816	NPM1		NPM1		nucleophosmin 1	Nucleus	transcription regulator
	TC149884	NM_001140148	Salmo salar Nucleophosmin (npm) mRNA_x0001_gb-BT045325.1- Salmo salar clone ssal-rgf-518-190 Nucleophosmin putative mRNA complete cds	1.282	0.003452	NPM1		NPM1		nucleophosmin 1	Nucleus	transcription regulator
	TC160085	NM_001140148	Salmo salar Nucleophosmin (npm) mRNA_x0001_gb-BT045325.1- Salmo salar clone ssal-rgf-518-190 Nucleophosmin putative mRNA complete cds	1.247	0.004784	NPM1		NPM1		nucleophosmin 1	Nucleus	transcription regulator
	TC136181	BT045263	Salmo salar clone ssal-rgf-516-350 Ornithine decarboxylase 1 putative mRNA complete cds	2.83	0	ODC1		ODC1	2.19725	ornithine decarboxylase 1	Cytoplasm	enzyme
	TC140405	BT045263	Salmo salar clone ssal-rgf-516-350 Ornithine decarboxylase 1 putative mRNA complete cds	2.702	0.000181	ODC1		ODC1		ornithine decarboxylase 1	Cytoplasm	enzyme
	TC143575	BT045263	Salmo salar clone ssal-rgf-516-350 Ornithine decarboxylase 1 putative mRNA complete cds	1.714	4.9e-05	ODC1		ODC1		ornithine decarboxylase 1	Cytoplasm	enzyme
	TC153559	AC182751	Gasterosteus aculeatus clone VMRC26-154K14 complete sequence	1.543	1.4e-05	ODC1		ODC1		ornithine decarboxylase 1	Cytoplasm	enzyme
	TC143363	EU221177	Salmo salar clone 242N16 formin-binding protein 1 gene partial sequence and TCR gamma locus region	4.332	0.003719	OLFM1		OLFM1	2.64967	olfactomedin 1	Cytoplasm	other
	TC161394	EU221177	Salmo salar clone 242N16 formin-binding protein 1 gene partial sequence and TCR gamma locus region	2.064	7.7e-05	OLFM1		OLFM1		olfactomedin 1	Cytoplasm	other
	TC155032	EU221177	Salmo salar clone 242N16 formin-binding protein 1 gene partial sequence and TCR gamma locus region	1.553	0.007761	OLFM1		OLFM1		olfactomedin 1	Cytoplasm	other
	TC150838	NM_001172049	Oryzias latipes paired-box transcription factor pax1 (pax1) mRNA_x0001_dbj-AB187121.1- Oryzias latipes pax1 mRNA for paired-box transcription factor pax1 complete cds	-1.144	0.000213	PAX1		PAX1	-1.314	paired box 1	Nucleus	transcription regulator
	TC143799	XM_695785	PREDICTED: Danio rerio si:dkeyp-50f5.1 (si:dkeyp-50f5.1) mRNA	-1.484	6.3e-05	PAX1		PAX1		paired box 1	Nucleus	transcription regulator
	TC139516	NM_001089369	Danio rerio polycomb group ring finger 6 (pcgf6) mRNA_x0001_gb-BC139554.1- Danio rerio si:ch211-67n3.7 mRNA (cDNA clone MGC:162242 IMAGE:8745325) complete cds	-1.219	0.000419	PCGF6		PCGF6	-1.298	polycomb group ring finger 6	Nucleus	transcription regulator
	TC157651	NM_001089369	Danio rerio polycomb group ring finger 6 (pcgf6) mRNA_x0001_gb-BC139554.1- Danio rerio si:ch211-67n3.7 mRNA (cDNA clone MGC:162242 IMAGE:8745325) complete cds	-1.377	0.000616	PCGF6		PCGF6		polycomb group ring finger 6	Nucleus	transcription regulator
	TC137496	BT072660	Salmo salar clone ssal-rgf-535-153 3-phosphoinositide-dependent protein kinase 1 putative mRNA partial cds	1.198	0.0002	PDPK1		PDPK1	1.15267	3-phosphoinositide dependent protein kinase 1	Cytoplasm	kinase
	TC138111	BT072517	Salmo salar clone ssal-rgf-528-225 3-phosphoinositide-dependent protein kinase 1 putative mRNA pseudogene cds	1.154	0.000809	PDPK1		PDPK1		3-phosphoinositide dependent protein kinase 1	Cytoplasm	kinase
	TC145160	BT072517	Salmo salar clone ssal-rgf-528-225 3-phosphoinositide-dependent protein kinase 1 putative mRNA pseudogene cds	1.106	0.000611	PDPK1		PDPK1		3-phosphoinositide dependent protein kinase 1	Cytoplasm	kinase
	TC147184	NM_001140004	Salmo salar Peflin (pef1) mRNA_x0001_gb-BT045052.1- Salmo salar clone ssal-rgf-510-271 Peflin putative mRNA complete cds	1.566	0.00069	PEF1		PEF1	1.363	penta-EF-hand domain containing 1	Cytoplasm	other
	TC152742	NM_001140004	Salmo salar Peflin (pef1) mRNA_x0001_gb-BT045052.1- Salmo salar clone ssal-rgf-510-271 Peflin putative mRNA complete cds	1.391	6.2e-05	PEF1		PEF1		penta-EF-hand domain containing 1	Cytoplasm	other
	TC161617	NM_001140004	Salmo salar Peflin (pef1) mRNA_x0001_gb-BT045052.1- Salmo salar clone ssal-rgf-510-271 Peflin putative mRNA complete cds	1.132	0.003214	PEF1		PEF1		penta-EF-hand domain containing 1	Cytoplasm	other
	TC157817	NM_001141720	Salmo salar PERP TP53 apoptosis effector (perp) mRNA_x0001_gb-BT044829.1- Salmo salar clone ssal-rgf-505-001 p53 apoptosis effector related to PMP-22 putative mRNA complete cds	1.315	0.000151	PERP		PERP	1.309	p53 apoptosis effector related to PMP22	Plasma Membrane	other
	TC171177	NM_001141720	Salmo salar PERP TP53 apoptosis effector (perp) mRNA_x0001_gb-BT044829.1- Salmo salar clone ssal-rgf-505-001 p53 apoptosis effector related to PMP-22 putative mRNA complete cds	1.303	0.00017	PERP		PERP		p53 apoptosis effector related to PMP22	Plasma Membrane	other
	TC165829	NM_001140298	Salmo salar Probable phosphatase phospho1 (phop1) mRNA_x0001_gb-BT045610.1- Salmo salar clone ssal-rgf-526-176 Probable phosphatase phospho1 putative mRNA complete cds	1.315	0.000908	PHOSPHO1		PHOSPHO1	1.138	phosphoethanolamine/phosphocholine phosphatase 1	Extracellular Space	enzyme
	TC142223	NM_001140298	Salmo salar Probable phosphatase phospho1 (phop1) mRNA_x0001_gb-BT045610.1- Salmo salar clone ssal-rgf-526-176 Probable phosphatase phospho1 putative mRNA complete cds	1.079	0.00173	PHOSPHO1		PHOSPHO1		phosphoethanolamine/phosphocholine phosphatase 1	Extracellular Space	enzyme
	TC156772	NM_001140298	Salmo salar Probable phosphatase phospho1 (phop1) mRNA_x0001_gb-BT045610.1- Salmo salar clone ssal-rgf-526-176 Probable phosphatase phospho1 putative mRNA complete cds	1.02	0.022634	PHOSPHO1		PHOSPHO1		phosphoethanolamine/phosphocholine phosphatase 1	Extracellular Space	enzyme
	TC149357	NM_001141576	Salmo salar pirin (pir) mRNA_x0001_gb-BT050207.1- Salmo salar clone ssal-rgb2-577-293 Pirin putative mRNA complete cds	-1.479	2.8e-05	PIR		PIR	-1.54733	pirin	Nucleus	transcription regulator
	TC135742	NM_001141576	Salmo salar pirin (pir) mRNA_x0001_gb-BT050207.1- Salmo salar clone ssal-rgb2-577-293 Pirin putative mRNA complete cds	-1.524	8.3e-05	PIR		PIR		pirin	Nucleus	transcription regulator
	TC154022	NM_001141576	Salmo salar pirin (pir) mRNA_x0001_gb-BT050207.1- Salmo salar clone ssal-rgb2-577-293 Pirin putative mRNA complete cds	-1.639	6e-06	PIR		PIR		pirin	Nucleus	transcription regulator
	TC143245	NM_001165095	Oncorhynchus mykiss Group XIIA secretory phospholipase A2 (pg12a) mRNA_x0001_gb-BT073865.1- Oncorhynchus mykiss clone omyk-evo-507-207 Group XIIA secretory phospholipase A2 precursor putative mRNA complete cds	-1.472	0.000173	PLA2G12A		PLA2G12A	-1.493	phospholipase A2 group XIIA	Other	enzyme
	TC134444	BT073421	Oncorhynchus mykiss clone omyk-evn-504-011 Group XIIA secretory phospholipase A2 precursor putative mRNA complete cds	-1.514	6.7e-05	PLA2G12A		PLA2G12A		phospholipase A2 group XIIA	Other	enzyme
	TC152989	BT074121	Oncorhynchus mykiss clone omyk-evo-506-266 Placenta-specific gene 8 protein putative mRNA complete cds	2.42	2e-06	PLAC8L1		PLAC8L1	1.789	PLAC8 like 1	Other	other
	TC164012	BT074121	Oncorhynchus mykiss clone omyk-evo-506-266 Placenta-specific gene 8 protein putative mRNA complete cds	1.158	4.6e-05	PLAC8L1		PLAC8L1		PLAC8 like 1	Other	other
	TC155239	BT072598	Salmo salar clone ssal-rgf-532-023 Adipophilin putative mRNA partial cds	2.973	0	PLIN2		PLIN2	2.01725	perilipin 2	Plasma Membrane	other
	TC135848	BT072598	Salmo salar clone ssal-rgf-532-023 Adipophilin putative mRNA partial cds	2.705	0	PLIN2		PLIN2		perilipin 2	Plasma Membrane	other
	TC135784	BT072598	Salmo salar clone ssal-rgf-532-023 Adipophilin putative mRNA partial cds	1.213	0.001289	PLIN2		PLIN2		perilipin 2	Plasma Membrane	other
	TC136864	BT072598	Salmo salar clone ssal-rgf-532-023 Adipophilin putative mRNA partial cds	1.178	0.000818	PLIN2		PLIN2		perilipin 2	Plasma Membrane	other
	TC171005	BT059243	Salmo salar clone ssal-rgf-536-004 Peripheral myelin protein 22 putative mRNA complete cds	1.583	0.000132	PMP22		PMP22	1.437	peripheral myelin protein 22	Plasma Membrane	other
	TC143263	BT059243	Salmo salar clone ssal-rgf-536-004 Peripheral myelin protein 22 putative mRNA complete cds	1.291	0.000129	PMP22		PMP22		peripheral myelin protein 22	Plasma Membrane	other
	TC157368	U56718	Oncorhynchus nerka microsatellite Oneu18 sequence	1.374	0.004328	POPDC3		POPDC3	1.283	popeye domain containing 3	Other	other
	TC142323	BX511173	Zebrafish DNA sequence from clone DKEY-278K10 in linkage group 16 complete sequence	1.192	0.019036	POPDC3		POPDC3		popeye domain containing 3	Other	other
	TC136629	BT045163	Salmo salar clone ssal-rgf-513-355 PQ-loop repeat-containing protein 2 putative mRNA complete cds	1.675	0.008957	PQLC2		SLC66A1	1.48	solute carrier family 66 member 1	Cytoplasm	transporter
	TC146126	BT045163	Salmo salar clone ssal-rgf-513-355 PQ-loop repeat-containing protein 2 putative mRNA complete cds	1.285	0.000108	PQLC2		SLC66A1		solute carrier family 66 member 1	Cytoplasm	transporter
	IMM 356	not-annotated	not-annotated	-2.084	0.017151	PRKRA		PRKRA	-2.4035	protein activator of interferon induced protein kinase EIF2AK2	Cytoplasm	other
	IMM 356	not-annotated	not-annotated	-2.723	0.038983	PRKRA		PRKRA		protein activator of interferon induced protein kinase EIF2AK2	Cytoplasm	other
	TC165363	FQ310508	Dicentrarchus labrax chromosome sequence corresponding to linkage group 18 complete sequence	1.798	7e-06	PRMT6		PRMT6	1.55133	protein arginine methyltransferase 6	Nucleus	enzyme
	CUST_60_PI420312184	FQ310508	Dicentrarchus labrax chromosome sequence corresponding to linkage group 18 complete sequence	1.689	6.1e-05	PRMT6		PRMT6		protein arginine methyltransferase 6	Nucleus	enzyme
	TC137992	NM_001163988	Danio rerio protein arginine methyltransferase 6 (prmt6) mRNA	1.167	0.001477	PRMT6		PRMT6		protein arginine methyltransferase 6	Nucleus	enzyme
	IMM 882	NM_001124348	Oncorhynchus mykiss cyclooxygenase-2 (cox-2) mRNA_x0001_emb-AJ238307.1- Oncorhynchus mykiss mRNA for cyclooxygenase-2	2.47	2e-06	PTGS2		PTGS2	2.06313	prostaglandin-endoperoxide synthase 2	Cytoplasm	enzyme
	IMM 882	NM_001124348	Oncorhynchus mykiss cyclooxygenase-2 (cox-2) mRNA_x0001_emb-AJ238307.1- Oncorhynchus mykiss mRNA for cyclooxygenase-2	2.287	4e-06	PTGS2		PTGS2		prostaglandin-endoperoxide synthase 2	Cytoplasm	enzyme
	IMM 1051	NM_001124667	Oncorhynchus mykiss prostaglandin-endoperoxide synthase 2b (ptgs2b) mRNA_x0001_gb-EF175381.1- Oncorhynchus mykiss prostaglandin G/H synthase 2b (ptgs2b) mRNA complete cds	2.263	8e-05	PTGS2		PTGS2		prostaglandin-endoperoxide synthase 2	Cytoplasm	enzyme
	IMM 882	NM_001124348	Oncorhynchus mykiss cyclooxygenase-2 (cox-2) mRNA_x0001_emb-AJ238307.1- Oncorhynchus mykiss mRNA for cyclooxygenase-2	2.184	3e-06	PTGS2		PTGS2		prostaglandin-endoperoxide synthase 2	Cytoplasm	enzyme
	IMM 1051	NM_001124667	Oncorhynchus mykiss prostaglandin-endoperoxide synthase 2b (ptgs2b) mRNA_x0001_gb-EF175381.1- Oncorhynchus mykiss prostaglandin G/H synthase 2b (ptgs2b) mRNA complete cds	2.184	0.000187	PTGS2		PTGS2		prostaglandin-endoperoxide synthase 2	Cytoplasm	enzyme
	IMM 1051	NM_001124667	Oncorhynchus mykiss prostaglandin-endoperoxide synthase 2b (ptgs2b) mRNA_x0001_gb-EF175381.1- Oncorhynchus mykiss prostaglandin G/H synthase 2b (ptgs2b) mRNA complete cds	1.809	0.000141	PTGS2		PTGS2		prostaglandin-endoperoxide synthase 2	Cytoplasm	enzyme
	TC155987	NM_001124667	Oncorhynchus mykiss prostaglandin-endoperoxide synthase 2b (ptgs2b) mRNA_x0001_gb-EF175381.1- Oncorhynchus mykiss prostaglandin G/H synthase 2b (ptgs2b) mRNA complete cds	1.763	0.000187	PTGS2		PTGS2		prostaglandin-endoperoxide synthase 2	Cytoplasm	enzyme
	TC132712	NM_001124667	Oncorhynchus mykiss prostaglandin-endoperoxide synthase 2b (ptgs2b) mRNA_x0001_gb-EF175381.1- Oncorhynchus mykiss prostaglandin G/H synthase 2b (ptgs2b) mRNA complete cds	1.545	0.001331	PTGS2		PTGS2		prostaglandin-endoperoxide synthase 2	Cytoplasm	enzyme
	TC171846	NM_001141178	Salmo salar CS022 protein (cs022) mRNA_x0001_gb-BT048544.1- Salmo salar clone ssal-evf-543-035 C19orf22 homolog putative mRNA complete cds	-1.231	0.016849	R3HDM4		R3HDM4	-1.291	R3H domain containing 4	Other	other
	TC161801	NM_001141178	Salmo salar CS022 protein (cs022) mRNA_x0001_gb-BT048544.1- Salmo salar clone ssal-evf-543-035 C19orf22 homolog putative mRNA complete cds	-1.351	0.022103	R3HDM4		R3HDM4		R3H domain containing 4	Other	other
	TC169464	NM_001140559	Salmo salar Ras-related protein Rab-11A (rb11a) mRNA_x0001_gb-BT046081.1- Salmo salar clone ssal-rgf-541-069 Ras-related protein Rab-11A putative mRNA complete cds	1.387	0.01099	RAB11A		RAB11A	1.213	RAB11A, member RAS oncogene family	Cytoplasm	enzyme
	TC153769	NM_001140559	Salmo salar Ras-related protein Rab-11A (rb11a) mRNA_x0001_gb-BT046081.1- Salmo salar clone ssal-rgf-541-069 Ras-related protein Rab-11A putative mRNA complete cds	1.254	0.000174	RAB11A		RAB11A		RAB11A, member RAS oncogene family	Cytoplasm	enzyme
	TC158393	NM_001140559	Salmo salar Ras-related protein Rab-11A (rb11a) mRNA_x0001_gb-BT046081.1- Salmo salar clone ssal-rgf-541-069 Ras-related protein Rab-11A putative mRNA complete cds	1.195	0.000654	RAB11A		RAB11A		RAB11A, member RAS oncogene family	Cytoplasm	enzyme
	TC161839	NM_001140559	Salmo salar Ras-related protein Rab-11A (rb11a) mRNA_x0001_gb-BT046081.1- Salmo salar clone ssal-rgf-541-069 Ras-related protein Rab-11A putative mRNA complete cds	1.016	0.02248	RAB11A		RAB11A		RAB11A, member RAS oncogene family	Cytoplasm	enzyme
	TC161983	BT059700	Salmo salar clone ssal-rgf-002-342 Ras-related protein Rab-1A putative mRNA complete cds	1.555	0.012439	RAB1A		RAB1A	1.3885	RAB1A, member RAS oncogene family	Cytoplasm	enzyme
	TC161926	BT059700	Salmo salar clone ssal-rgf-002-342 Ras-related protein Rab-1A putative mRNA complete cds	1.222	0.005092	RAB1A		RAB1A		RAB1A, member RAS oncogene family	Cytoplasm	enzyme
	TC148517	NM_001173870	Salmo salar RAB9A member RAS oncogene family (rab9a) mRNA_x0001_gb-BT059706.1- Salmo salar clone ssal-rgf-522-243 Ras-related protein Rab-9A putative mRNA complete cds	1.834	3e-06	RAB9A		RAB9A	1.556	RAB9A, member RAS oncogene family	Cytoplasm	enzyme
	TC148063	BT027421	Gasterosteus aculeatus clone CFW272-G11 mRNA sequence	1.278	8.3e-05	RAB9A		RAB9A		RAB9A, member RAS oncogene family	Cytoplasm	enzyme
	TC142738	NM_001140262	Salmo salar RAD21 homolog (S. pombe) (rad21) mRNA_x0001_gb-BT045542.1- Salmo salar clone ssal-rgf-524-220 Double-strand-break repair protein rad21 homolog putative mRNA complete cds	-1.064	0.000525	RAD21		RAD21	-1.896	RAD21 cohesin complex component	Nucleus	transcription regulator
	TC139268	NM_001140262	Salmo salar RAD21 homolog (S. pombe) (rad21) mRNA_x0001_gb-BT045542.1- Salmo salar clone ssal-rgf-524-220 Double-strand-break repair protein rad21 homolog putative mRNA complete cds	-2.728	0.005117	RAD21		RAD21		RAD21 cohesin complex component	Nucleus	transcription regulator
	TC158765	BT075649	Osmerus mordax clone omor-eva-513-377 Ras-related protein Rap-2b precursor putative mRNA complete cds	2.482	0.000888	RAP2B		RAP2B	1.849	RAP2B, member of RAS oncogene family	Plasma Membrane	enzyme
	TC135114	XM_002759480	PREDICTED: Callithrix jacchus ras-related protein Rap-2b-like (LOC100391175) mRNA	1.216	0.003653	RAP2B		RAP2B		RAP2B, member of RAS oncogene family	Plasma Membrane	enzyme
	TC161632	NM_001140381	Salmo salar receptor accessory protein 3 (reep3) mRNA_x0001_gb-BT045759.1- Salmo salar clone ssal-rgf-530-260 Receptor expression-enhancing protein 3 putative mRNA complete cds	1.139	0.000118	REEP3		REEP3	1.097	receptor accessory protein 3	Other	other
	TC160459	NM_001140381	Salmo salar receptor accessory protein 3 (reep3) mRNA_x0001_gb-BT045759.1- Salmo salar clone ssal-rgf-530-260 Receptor expression-enhancing protein 3 putative mRNA complete cds	1.055	0.000199	REEP3		REEP3		receptor accessory protein 3	Other	other
	TC134098	BT048894	Salmo salar clone ssal-eve-562-283 Regulator of G-protein signaling 2 putative mRNA complete cds	1.598	4.9e-05	RGS1		RGS1	1.445	regulator of G protein signaling 1	Plasma Membrane	enzyme
	TC159660	BT047230	Salmo salar clone ssal-sjb-017-163 Regulator of G-protein signaling 1 putative mRNA complete cds	1.48	2e-05	RGS1		RGS1		regulator of G protein signaling 1	Plasma Membrane	enzyme
	TC135515	NM_001165154	Oncorhynchus mykiss regulator of G-protein signaling 1 (rgs1) mRNA_x0001_gb-BT074111.1- Oncorhynchus mykiss clone omyk-evo-508-055 Regulator of G-protein signaling 1 putative mRNA complete cds	1.257	0.00091	RGS1		RGS1		regulator of G protein signaling 1	Plasma Membrane	enzyme
	TC159745	NM_001124516	Oncorhynchus mykiss regulator of G-protein signalling 14 (LOC100136252) mRNA_x0001_gb-AY606041.1- Oncorhynchus mykiss regulator of G-protein signalling 14 mRNA complete cds	2.384	3e-06	RGS14		RGS14	2.0116	regulator of G protein signaling 14	Cytoplasm	enzyme
	TC168207	NM_001124516	Oncorhynchus mykiss regulator of G-protein signalling 14 (LOC100136252) mRNA_x0001_gb-AY606041.1- Oncorhynchus mykiss regulator of G-protein signalling 14 mRNA complete cds	2.223	4.7e-05	RGS14		RGS14		regulator of G protein signaling 14	Cytoplasm	enzyme
	IMM 492	NM_001124516	Oncorhynchus mykiss regulator of G-protein signalling 14 (LOC100136252) mRNA_x0001_gb-AY606041.1- Oncorhynchus mykiss regulator of G-protein signalling 14 mRNA complete cds	2.006	0.00358	RGS14		RGS14		regulator of G protein signaling 14	Cytoplasm	enzyme
	IMM 492	NM_001124516	Oncorhynchus mykiss regulator of G-protein signalling 14 (LOC100136252) mRNA_x0001_gb-AY606041.1- Oncorhynchus mykiss regulator of G-protein signalling 14 mRNA complete cds	1.726	0.001509	RGS14		RGS14		regulator of G protein signaling 14	Cytoplasm	enzyme
	IMM 492	NM_001124516	Oncorhynchus mykiss regulator of G-protein signalling 14 (LOC100136252) mRNA_x0001_gb-AY606041.1- Oncorhynchus mykiss regulator of G-protein signalling 14 mRNA complete cds	1.719	0.003948	RGS14		RGS14		regulator of G protein signaling 14	Cytoplasm	enzyme
	TC146368	BT050028	Salmo salar clone ssal-evd-566-338 Regulator of G-protein signaling 5 putative mRNA complete cds	3.482	0	RGS5		RGS5	2.265	regulator of G protein signaling 5	Plasma Membrane	enzyme
	TC137593	BT057794	Salmo salar clone ssal-sjb-014-115 Regulator of G-protein signaling 5 putative mRNA complete cds	1.048	0.030857	RGS5		RGS5		regulator of G protein signaling 5	Plasma Membrane	enzyme
	TC132358	NM_001124523	Oncorhynchus mykiss Rhesus blood group C glycoprotein (rhcg) mRNA_x0001_gb-AY619986.1- Oncorhynchus mykiss Rh type C glycoprotein (RhCG) mRNA complete cds	-1.351	0.000301	RHCG		RHCG	-1.569	Rh family C glycoprotein	Plasma Membrane	transporter
	TC147068	NM_001124523	Oncorhynchus mykiss Rhesus blood group C glycoprotein (rhcg) mRNA_x0001_gb-AY619986.1- Oncorhynchus mykiss Rh type C glycoprotein (RhCG) mRNA complete cds	-1.787	3.3e-05	RHCG		RHCG		Rh family C glycoprotein	Plasma Membrane	transporter
	TC152190	BT074355	Oncorhynchus mykiss clone omyk-evo-502-258 Rho-related GTP-binding protein RhoF putative mRNA complete cds	1.45	1.5e-05	RHOF		RHOF	1.2815	ras homolog family member F, filopodia associated	Cytoplasm	enzyme
	TC136112	BT074175	Oncorhynchus mykiss clone omyk-evo-503-156 Rho-related GTP-binding protein RhoF putative mRNA complete cds	1.357	0.000103	RHOF		RHOF		ras homolog family member F, filopodia associated	Cytoplasm	enzyme
	TC134467	BT074175	Oncorhynchus mykiss clone omyk-evo-503-156 Rho-related GTP-binding protein RhoF putative mRNA complete cds	1.171	0.000193	RHOF		RHOF		ras homolog family member F, filopodia associated	Cytoplasm	enzyme
	TC138483	BT074175	Oncorhynchus mykiss clone omyk-evo-503-156 Rho-related GTP-binding protein RhoF putative mRNA complete cds	1.148	0.000366	RHOF		RHOF		ras homolog family member F, filopodia associated	Cytoplasm	enzyme
	TC143338	BT043618	Salmo salar clone HM4_3639 ankyrin repeat domain 1 (ankrd1) mRNA complete cds	-1.044	0.027186	RPP30		RPP30	-1.7885	ribonuclease P/MRP subunit p30	Nucleus	enzyme
	TC139961	NM_001141560	Salmo salar ribonuclease P/MRP 30 subunit (rpp30) mRNA_x0001_gb-BT050151.1- Salmo salar clone ssal-eve-552-168 Ribonuclease P protein subunit p30 putative mRNA complete cds	-2.533	0.025299	RPP30		RPP30		ribonuclease P/MRP subunit p30	Nucleus	enzyme
	TC141015	not-annotated	not-annotated	1.449	1.2e-05	RSL1D1		RSL1D1	1.384	ribosomal L1 domain containing 1	Nucleus	other
	TC151072	not-annotated	not-annotated	1.319	0.000267	RSL1D1		RSL1D1		ribosomal L1 domain containing 1	Nucleus	other
	TC171602	NM_001124750	Oncorhynchus mykiss reticulon 4 (rtn4) mRNA_x0001_tpg-BK004986.1- TPA_exp: Oncorhynchus mykiss RTN4-L (RTN4) mRNA complete cds; and 3' UTR	1.18	0.005382	RTN4		RTN4	1.1055	reticulon 4	Cytoplasm	other
	TC141789	tpg-BK004984.1-	TPA_exp: Oncorhynchus mykiss RTN10-N (RTN10) mRNA complete cds; and 3' UTR	1.031	0.000261	RTN4		RTN4		reticulon 4	Cytoplasm	other
	TC168650	AM422447	Oncorhynchus mykiss saa gene for serum amyloid A exons 1-3	2.806	0.00014	SAA2		SAA2	1.3257	serum amyloid A2	Extracellular Space	other
	IMM 1088	NM_001124436	Oncorhynchus mykiss serum amyloid A (saa) mRNA_x0001_emb-AM422446.1- Oncorhynchus mykiss mRNA for serum amyloid A (saa gene)	1.336	0.000453	SAA2		SAA2		serum amyloid A2	Extracellular Space	other
	TC171675	NM_001124436	Oncorhynchus mykiss serum amyloid A (saa) mRNA_x0001_emb-AM422446.1- Oncorhynchus mykiss mRNA for serum amyloid A (saa gene)	1.33	0.000457	SAA2		SAA2		serum amyloid A2	Extracellular Space	other
	TC170600	AM422447	Oncorhynchus mykiss saa gene for serum amyloid A exons 1-3	1.299	0.001027	SAA2		SAA2		serum amyloid A2	Extracellular Space	other
	TC171918	NM_001124436	Oncorhynchus mykiss serum amyloid A (saa) mRNA_x0001_emb-AM422446.1- Oncorhynchus mykiss mRNA for serum amyloid A (saa gene)	1.219	0.000486	SAA2		SAA2		serum amyloid A2	Extracellular Space	other
	TC169258	NM_001146565	Salmo salar Serum amyloid A-5 protein (saa5) mRNA_x0001_gb-BT057477.1- Salmo salar clone ssal-eve-561-244 Serum amyloid A-5 protein putative mRNA complete cds	1.095	0.001375	SAA2		SAA2		serum amyloid A2	Extracellular Space	other
	TC162265	NM_001124436	Oncorhynchus mykiss serum amyloid A (saa) mRNA_x0001_emb-AM422446.1- Oncorhynchus mykiss mRNA for serum amyloid A (saa gene)	1.068	0.001335	SAA2		SAA2		serum amyloid A2	Extracellular Space	other
	IMM 1088	NM_001124436	Oncorhynchus mykiss serum amyloid A (saa) mRNA_x0001_emb-AM422446.1- Oncorhynchus mykiss mRNA for serum amyloid A (saa gene)	1.057	0.001446	SAA2		SAA2		serum amyloid A2	Extracellular Space	other
	TC171267	NM_001124436	Oncorhynchus mykiss serum amyloid A (saa) mRNA_x0001_emb-AM422446.1- Oncorhynchus mykiss mRNA for serum amyloid A (saa gene)	1.043	0.00177	SAA2		SAA2		serum amyloid A2	Extracellular Space	other
	TC165887	NM_001124436	Oncorhynchus mykiss serum amyloid A (saa) mRNA_x0001_emb-AM422446.1- Oncorhynchus mykiss mRNA for serum amyloid A (saa gene)	1.004	0.004486	SAA2		SAA2		serum amyloid A2	Extracellular Space	other
	TC159835	NM_001141789	Salmo salar SAR1 gene homolog A (S. cerevisiae) (sar1a) mRNA_x0001_gb-BT045729.1- Salmo salar clone ssal-rgf-529-352 GTP-binding protein SAR1a putative mRNA complete cds	2.497	0.029831	SAR1A		SAR1A	1.8025	secretion associated Ras related GTPase 1A	Cytoplasm	enzyme
	TC155316	NM_001141789	Salmo salar SAR1 gene homolog A (S. cerevisiae) (sar1a) mRNA_x0001_gb-BT045729.1- Salmo salar clone ssal-rgf-529-352 GTP-binding protein SAR1a putative mRNA complete cds	1.108	0.000212	SAR1A		SAR1A		secretion associated Ras related GTPase 1A	Cytoplasm	enzyme
	TC161962	BT059298	Salmo salar clone ssal-rgf-540-024 Diamine acetyltransferase 1 putative mRNA complete cds	2.113	2e-06	SAT1		SAT1	2.0185	spermidine/spermine N1-acetyltransferase 1	Cytoplasm	enzyme
	TC165462	BT057151	Salmo salar clone ssal-evf-507-121 Diamine acetyltransferase 1 putative mRNA complete cds	1.924	5e-06	SAT1		SAT1		spermidine/spermine N1-acetyltransferase 1	Cytoplasm	enzyme
	IMM 664	CR722688	Tetraodon nigroviridis full-length cDNA	1.424	0.000505	SDC4		SDC4	1.36225	syndecan 4	Plasma Membrane	other
	IMM 664	CR722688	Tetraodon nigroviridis full-length cDNA	1.401	0.00058	SDC4		SDC4		syndecan 4	Plasma Membrane	other
	IMM 664	CR722688	Tetraodon nigroviridis full-length cDNA	1.381	0.000705	SDC4		SDC4		syndecan 4	Plasma Membrane	other
	TC143542	CR722688	Tetraodon nigroviridis full-length cDNA	1.243	0.007063	SDC4		SDC4		syndecan 4	Plasma Membrane	other
	TC132445	NM_001124515	Oncorhynchus mykiss leukocyte elastase inhibitor (LOC100136251) mRNA_x0001_gb-AY606039.1- Oncorhynchus mykiss leukocyte elastase inhibitor mRNA complete cds	1.418	1.7e-05	SERPINB1		SERPINB1	1.34167	serpin family B member 1	Cytoplasm	other
	IMM 1021	NM_001124515	Oncorhynchus mykiss leukocyte elastase inhibitor (LOC100136251) mRNA_x0001_gb-AY606039.1- Oncorhynchus mykiss leukocyte elastase inhibitor mRNA complete cds	1.347	2.1e-05	SERPINB1		SERPINB1		serpin family B member 1	Cytoplasm	other
	IMM 1021	NM_001124515	Oncorhynchus mykiss leukocyte elastase inhibitor (LOC100136251) mRNA_x0001_gb-AY606039.1- Oncorhynchus mykiss leukocyte elastase inhibitor mRNA complete cds	1.26	3e-05	SERPINB1		SERPINB1		serpin family B member 1	Cytoplasm	other
	TC165381	BT058794	Salmo salar clone ssal-rgf-503-184 Serine/threonine-protein kinase Sgk1 putative mRNA complete cds	1.716	0.001393	SGK1		SGK1	1.6345	serum/glucocorticoid regulated kinase 1	Cytoplasm	kinase
	TC160929	BT058794	Salmo salar clone ssal-rgf-503-184 Serine/threonine-protein kinase Sgk1 putative mRNA complete cds	1.553	0.003719	SGK1		SGK1		serum/glucocorticoid regulated kinase 1	Cytoplasm	kinase
	TC154724	BT044669	Salmo salar clone ssal-rgf-002-189 Small glutamine-rich tetratricopeptide repeat-containing protein A putative mRNA complete cds	1.128	0.007565	SGTA		SGTA	1.0665	small glutamine rich tetratricopeptide repeat containing alpha	Cytoplasm	other
	TC156774	BT044669	Salmo salar clone ssal-rgf-002-189 Small glutamine-rich tetratricopeptide repeat-containing protein A putative mRNA complete cds	1.005	0.014325	SGTA		SGTA		small glutamine rich tetratricopeptide repeat containing alpha	Cytoplasm	other
	TC153563	NM_001104741	Oryzias latipes Medaka OG-12 (mog-12) mRNA_x0001_gb-AF001393.1-AF001393 Oryzias latipes Medaka OG-12 (MOG-12) mRNA complete cds	-1.18	0.004282	SHOX		SHOX	-1.196	short stature homeobox	Cytoplasm	transcription regulator
	TC150937	NM_001104741	Oryzias latipes Medaka OG-12 (mog-12) mRNA_x0001_gb-AF001393.1-AF001393 Oryzias latipes Medaka OG-12 (MOG-12) mRNA complete cds	-1.212	0.004875	SHOX		SHOX		short stature homeobox	Cytoplasm	transcription regulator
	TC142099	BT072023	Salmo salar clone ssal-rgf-508-001 Mitochondrial glutamate carrier 1 putative mRNA pseudogene cds	1.959	1.8e-05	SLC25A22		SLC25A22	1.8725	solute carrier family 25 member 22	Cytoplasm	transporter
	TC141410	BT072023	Salmo salar clone ssal-rgf-508-001 Mitochondrial glutamate carrier 1 putative mRNA pseudogene cds	1.786	2e-05	SLC25A22		SLC25A22		solute carrier family 25 member 22	Cytoplasm	transporter
	TC132999	NM_001124481	Oncorhynchus mykiss zinc/iron-regulated protein (zip1) mRNA_x0001_gb-AY387045.1- Oncorhynchus mykiss zinc/iron-regulated protein (ZIP1) mRNA complete cds	1.876	1e-05	SLC39A1		SLC39A1	1.7325	solute carrier family 39 member 1	Plasma Membrane	transporter
	TC132479	NM_001124481	Oncorhynchus mykiss zinc/iron-regulated protein (zip1) mRNA_x0001_gb-AY387045.1- Oncorhynchus mykiss zinc/iron-regulated protein (ZIP1) mRNA complete cds	1.589	3e-06	SLC39A1		SLC39A1		solute carrier family 39 member 1	Plasma Membrane	transporter
	TC145762	BT059429	Salmo salar clone ssal-rgf-535-295 4F2 cell-surface antigen heavy chain putative mRNA complete cds	1.301	0.010968	SLC3A2		SLC3A2	1.1845	solute carrier family 3 member 2	Plasma Membrane	transporter
	TC133867	BT071973	Salmo salar clone ssal-rgf-505-306 4F2 cell-surface antigen heavy chain putative mRNA pseudogene cds	1.068	0.002273	SLC3A2		SLC3A2		solute carrier family 3 member 2	Plasma Membrane	transporter
	TC139036	BT058849	Salmo salar clone ssal-rgf-507-300 Ezrin-radixin-moesin-binding phosphoprotein 50 putative mRNA complete cds	2.489	0.017904	SLC9A3R1		SLC9A3R1	1.96067	SLC9A3 regulator 1	Plasma Membrane	other
	TC159209	BT058849	Salmo salar clone ssal-rgf-507-300 Ezrin-radixin-moesin-binding phosphoprotein 50 putative mRNA complete cds	1.742	5e-06	SLC9A3R1		SLC9A3R1		SLC9A3 regulator 1	Plasma Membrane	other
	TC150201	BT058849	Salmo salar clone ssal-rgf-507-300 Ezrin-radixin-moesin-binding phosphoprotein 50 putative mRNA complete cds	1.651	0.00118	SLC9A3R1		SLC9A3R1		SLC9A3 regulator 1	Plasma Membrane	other
	TC168434	BT050297	Salmo salar clone ssal-eve-547-204 slowmo homolog 2 putative mRNA complete cds	1.511	0.000611	SLMO2		PRELID3B	1.3	PRELI domain containing 3B	Cytoplasm	other
	TC132613	BT047121	Salmo salar clone ssal-rgb2-608-184 slowmo homolog 2 putative mRNA complete cds	1.089	6.5e-05	SLMO2		PRELID3B		PRELI domain containing 3B	Cytoplasm	other
	TC171815	BC066413	Danio rerio spermine oxidase mRNA (cDNA clone MGC:77167 IMAGE:6961486) complete cds	1.183	0.001334	SMOX		SMOX	1.1035	spermine oxidase	Cytoplasm	enzyme
	TC149175	BC066413	Danio rerio spermine oxidase mRNA (cDNA clone MGC:77167 IMAGE:6961486) complete cds	1.024	0.000993	SMOX		SMOX		spermine oxidase	Cytoplasm	enzyme
	TC169834	NM_001146166	Oncorhynchus mykiss suppressor of cytokine signaling 1 (socs1) mRNA_x0001_emb-AM748721.1- Oncorhynchus mykiss mRNA for suppressor of cytokine signaling 1 (socs1 gene)	1.273	0.000122	SOCS1		SOCS1	1.186	suppressor of cytokine signaling 1	Cytoplasm	other
	IMM 588	NM_001146166	Oncorhynchus mykiss suppressor of cytokine signaling 1 (socs1) mRNA_x0001_emb-AM748721.1- Oncorhynchus mykiss mRNA for suppressor of cytokine signaling 1 (socs1 gene)	1.099	0.000305	SOCS1		SOCS1		suppressor of cytokine signaling 1	Cytoplasm	other
	IMM 590	NM_001146168	Oncorhynchus mykiss suppressor of cytokine signaling 3 (socs3) mRNA_x0001_emb-AM748723.1- Oncorhynchus mykiss mRNA for suppressor of cytokine signaling 3 (socs3 gene)	1.603	2.8e-05	SOCS3		SOCS3	1.43275	suppressor of cytokine signaling 3	Cytoplasm	phosphatase
	TC172556	NM_001146168	Oncorhynchus mykiss suppressor of cytokine signaling 3 (socs3) mRNA_x0001_emb-AM748723.1- Oncorhynchus mykiss mRNA for suppressor of cytokine signaling 3 (socs3 gene)	1.426	5e-05	SOCS3		SOCS3		suppressor of cytokine signaling 3	Cytoplasm	phosphatase
	IMM 590	NM_001146168	Oncorhynchus mykiss suppressor of cytokine signaling 3 (socs3) mRNA_x0001_emb-AM748723.1- Oncorhynchus mykiss mRNA for suppressor of cytokine signaling 3 (socs3 gene)	1.383	0.000119	SOCS3		SOCS3		suppressor of cytokine signaling 3	Cytoplasm	phosphatase
	IMM 590	NM_001146168	Oncorhynchus mykiss suppressor of cytokine signaling 3 (socs3) mRNA_x0001_emb-AM748723.1- Oncorhynchus mykiss mRNA for suppressor of cytokine signaling 3 (socs3 gene)	1.319	0.000108	SOCS3		SOCS3		suppressor of cytokine signaling 3	Cytoplasm	phosphatase
	TC147510	BX465208	Zebrafish DNA sequence from clone DKEYP-91H6 in linkage group 6 complete sequence	-2.27	0.003391	SOX14		SOX14	-2.41	SRY-box transcription factor 14	Nucleus	transcription regulator
	TC142408	BX465208	Zebrafish DNA sequence from clone DKEYP-91H6 in linkage group 6 complete sequence	-2.55	0.005143	SOX14		SOX14		SRY-box transcription factor 14	Nucleus	transcription regulator
	TC147491	BC078221	Danio rerio SRY-box containing gene 19a mRNA (cDNA clone MGC:100784 IMAGE:7149968) complete cds	-1.497	0.016938	SOX2		SOX2	-2.52633	SRY-box transcription factor 2	Nucleus	transcription regulator
	TC140724	AY277954	Takifugu rubripes transcription factor Sox19 (Sox19) gene complete cds	-3.003	0.000987	SOX2		SOX2		SRY-box transcription factor 2	Nucleus	transcription regulator
	TC142205	AY277954	Takifugu rubripes transcription factor Sox19 (Sox19) gene complete cds	-3.079	0.009754	SOX2		SOX2		SRY-box transcription factor 2	Nucleus	transcription regulator
	TC156248	BT125170	Salmo salar clone ssal-rgb2-582-164 Signal peptidase complex subunit 3 putative mRNA complete cds	-1.381	0.000463	SPCS3		SPCS3	-1.387	signal peptidase complex subunit 3	Cytoplasm	peptidase
	TC163368	BT125170	Salmo salar clone ssal-rgb2-582-164 Signal peptidase complex subunit 3 putative mRNA complete cds	-1.393	0.007969	SPCS3		SPCS3		signal peptidase complex subunit 3	Cytoplasm	peptidase
	TC161336	NM_001165328	Salmo salar Spindlin-Z (spinz) mRNA_x0001_gb-BT058785.1- Salmo salar clone ssal-rgf-503-023 Spindlin-Z putative mRNA complete cds	-1.581	0.000132	SPIN1		SPIN1	-1.8455	spindlin 1	Nucleus	other
	TC146342	NM_001165328	Salmo salar Spindlin-Z (spinz) mRNA_x0001_gb-BT058785.1- Salmo salar clone ssal-rgf-503-023 Spindlin-Z putative mRNA complete cds	-2.11	3.3e-05	SPIN1		SPIN1		spindlin 1	Nucleus	other
	TC147283	BT049216	Salmo salar clone ssal-eve-502-340 Claudin-4 putative mRNA complete cds	2.477	0	STXBP2		STXBP2	1.7465	syntaxin binding protein 2	Plasma Membrane	transporter
	TC159630	not-annotated	not-annotated	1.016	0.003512	STXBP2		STXBP2		syntaxin binding protein 2	Plasma Membrane	transporter
	TC138487	not-annotated	not-annotated	-1.351	0.001042	SULT1C3		SULT1C3	-1.4835	sulfotransferase family 1C member 3	Cytoplasm	enzyme
	TC150648	not-annotated	not-annotated	-1.616	0.000103	SULT1C3		SULT1C3		sulfotransferase family 1C member 3	Cytoplasm	enzyme
	TC145384	BT075274	Osmerus mordax clone omor-eva-007-066 Sulfotransferase 6B1 putative mRNA complete cds	-1.163	0.001119	SULT6B1		SULT6B1	-1.3175	sulfotransferase family 6B member 1	Cytoplasm	enzyme
	TC143712	BT075274	Osmerus mordax clone omor-eva-007-066 Sulfotransferase 6B1 putative mRNA complete cds	-1.472	2.5e-05	SULT6B1		SULT6B1		sulfotransferase family 6B member 1	Cytoplasm	enzyme
	TC140997	BT046971	Salmo salar clone ssal-rgb2-658-181 Transgelin putative mRNA complete cds	2.41	1e-06	TAGLN2		TAGLN2	2.221	transgelin 2	Cytoplasm	other
	TC152086	BT046971	Salmo salar clone ssal-rgb2-658-181 Transgelin putative mRNA complete cds	2.032	6e-06	TAGLN2		TAGLN2		transgelin 2	Cytoplasm	other
	TC132384	NM_001140074	Salmo salar ATP-binding cassette sub-family B (MDR/TAP) member 3 (abcb3) mRNA_x0001_gb-BT045188.1- Salmo salar clone ssal-rgf-514-169 Antigen peptide transporter 2 putative mRNA complete cds	-1.031	0.00418	TAP2		TAP2	-1.18067	transporter 2, ATP binding cassette subfamily B member	Cytoplasm	transporter
	IMM 795	AF115538	Oncorhynchus mykiss TAP2B protein (OnmyTAP2B) mRNA OnmyTAP2B*01 allele complete cds	-1.13	0.018993	TAP2		TAP2		transporter 2, ATP binding cassette subfamily B member	Cytoplasm	transporter
	TC140759	NM_001123689	Salmo salar transport-associated protein 2A (tap2a1) mRNA	-1.381	0.000129	TAP2		TAP2		transporter 2, ATP binding cassette subfamily B member	Cytoplasm	transporter
	IMM 387	DQ092323	Oncorhynchus mykiss OSU-142 tapasin short form mRNA complete cds	-1.003	0.011215	TAPBP		TAPBP	-1.30071	TAP binding protein	Cytoplasm	transporter
	IMM 388	DQ092323	Oncorhynchus mykiss OSU-142 tapasin short form mRNA complete cds	-1.105	7.5e-05	TAPBP		TAPBP		TAP binding protein	Cytoplasm	transporter
	IMM 388	DQ092323	Oncorhynchus mykiss OSU-142 tapasin short form mRNA complete cds	-1.293	3.5e-05	TAPBP		TAPBP		TAP binding protein	Cytoplasm	transporter
	IMM 387	DQ092323	Oncorhynchus mykiss OSU-142 tapasin short form mRNA complete cds	-1.357	0.000936	TAPBP		TAPBP		TAP binding protein	Cytoplasm	transporter
	TC132395	NM_001124553	Oncorhynchus mykiss tapasin long form (LOC100136299) mRNA_x0001_gb-DQ092322.1- Oncorhynchus mykiss OSU-142 tapasin long form mRNA complete cds	-1.378	0.000723	TAPBP		TAPBP		TAP binding protein	Cytoplasm	transporter
	TC146685	NM_001124553	Oncorhynchus mykiss tapasin long form (LOC100136299) mRNA_x0001_gb-DQ092322.1- Oncorhynchus mykiss OSU-142 tapasin long form mRNA complete cds	-1.454	2e-05	TAPBP		TAPBP		TAP binding protein	Cytoplasm	transporter
	IMM 387	DQ092323	Oncorhynchus mykiss OSU-142 tapasin short form mRNA complete cds	-1.515	0.000386	TAPBP		TAPBP		TAP binding protein	Cytoplasm	transporter
	TC137650	BT125454	Salmo salar clone ssal-evd-559-368 Telethonin putative mRNA complete cds	1.546	0.011999	TCAP		TCAP	1.2875	titin-cap	Cytoplasm	other
	TC138411	BT125454	Salmo salar clone ssal-evd-559-368 Telethonin putative mRNA complete cds	1.029	0.031643	TCAP		TCAP		titin-cap	Cytoplasm	other
	IMM 1017	NM_001124508	Oncorhynchus mykiss tissue inhibitor of metalloproteinase 2 (LOC100136244) mRNA_x0001_gb-AY606030.1- Oncorhynchus mykiss tissue inhibitor of metalloproteinase 2 mRNA complete cds	1.503	6.4e-05	TIMP2		TIMP2	1.403	TIMP metallopeptidase inhibitor 2	Extracellular Space	other
	IMM 1017	NM_001124508	Oncorhynchus mykiss tissue inhibitor of metalloproteinase 2 (LOC100136244) mRNA_x0001_gb-AY606030.1- Oncorhynchus mykiss tissue inhibitor of metalloproteinase 2 mRNA complete cds	1.434	2.4e-05	TIMP2		TIMP2		TIMP metallopeptidase inhibitor 2	Extracellular Space	other
	IMM 1017	NM_001124508	Oncorhynchus mykiss tissue inhibitor of metalloproteinase 2 (LOC100136244) mRNA_x0001_gb-AY606030.1- Oncorhynchus mykiss tissue inhibitor of metalloproteinase 2 mRNA complete cds	1.272	0.000139	TIMP2		TIMP2		TIMP metallopeptidase inhibitor 2	Extracellular Space	other
	IMM 307	NM_001141843	Salmo salar Metalloproteinase inhibitor 3 (timp3) mRNA_x0001_gb-BT047204.2- Salmo salar clone ssal-evf-516-362 Metalloproteinase inhibitor 3 precursor putative mRNA complete cds	1.64	9.4e-05	TIMP3		TIMP3	1.37133	TIMP metallopeptidase inhibitor 3	Extracellular Space	other
	IMM 307	NM_001141843	Salmo salar Metalloproteinase inhibitor 3 (timp3) mRNA_x0001_gb-BT047204.2- Salmo salar clone ssal-evf-516-362 Metalloproteinase inhibitor 3 precursor putative mRNA complete cds	1.303	0.001299	TIMP3		TIMP3		TIMP metallopeptidase inhibitor 3	Extracellular Space	other
	IMM 307	NM_001141843	Salmo salar Metalloproteinase inhibitor 3 (timp3) mRNA_x0001_gb-BT047204.2- Salmo salar clone ssal-evf-516-362 Metalloproteinase inhibitor 3 precursor putative mRNA complete cds	1.171	0.000703	TIMP3		TIMP3		TIMP metallopeptidase inhibitor 3	Extracellular Space	other
	TC132333	NM_001124419	Oncorhynchus mykiss Toll-like receptor II (LOC100136121) mRNA_x0001_emb-AJ878915.1- Oncorhynchus mykiss mRNA for Toll-like receptor II (tlr II gene)	-4.424	0.0083	TLR3		TLR3	-4.643	toll like receptor 3	Plasma Membrane	cell surface receptor
	IMM 592	NM_001124578	Oncorhynchus mykiss Toll-like receptor 3-like protein (LOC100136342) mRNA_x0001_gb-DQ459470.1- Oncorhynchus mykiss Toll-like receptor 3-like protein mRNA complete cds	-4.862	0.022555	TLR3		TLR3		toll like receptor 3	Plasma Membrane	cell surface receptor
	IMM 406	NM_001171871	Oncorhynchus mykiss TNF decoy receptor-like (LOC100329213) mRNA	5.563	0	TNFRSF6B		TNFRSF6B	4.4647	TNF receptor superfamily member 6b	Plasma Membrane	cell surface receptor
	IMM 851	AF401631	Oncorhynchus mykiss TNF decoy receptor mRNA complete cds	5.373	0	TNFRSF6B		TNFRSF6B		TNF receptor superfamily member 6b	Plasma Membrane	cell surface receptor
	IMM 851	AF401631	Oncorhynchus mykiss TNF decoy receptor mRNA complete cds	5.274	0	TNFRSF6B		TNFRSF6B		TNF receptor superfamily member 6b	Plasma Membrane	cell surface receptor
	IMM 406	NM_001171871	Oncorhynchus mykiss TNF decoy receptor-like (LOC100329213) mRNA	5.203	0	TNFRSF6B		TNFRSF6B		TNF receptor superfamily member 6b	Plasma Membrane	cell surface receptor
	IMM 406	NM_001171871	Oncorhynchus mykiss TNF decoy receptor-like (LOC100329213) mRNA	5.195	0	TNFRSF6B		TNFRSF6B		TNF receptor superfamily member 6b	Plasma Membrane	cell surface receptor
	IMM 851	AF401631	Oncorhynchus mykiss TNF decoy receptor mRNA complete cds	4.778	0	TNFRSF6B		TNFRSF6B		TNF receptor superfamily member 6b	Plasma Membrane	cell surface receptor
	TC132555	NM_001124614	Oncorhynchus mykiss decoy receptor 3 protein-like (LOC100136637) mRNA_x0001_emb-AJ315137.1- Oncorhynchus mykiss partial mRNA for putative decoy receptor 3 protein	3.919	0	TNFRSF6B		TNFRSF6B		TNF receptor superfamily member 6b	Plasma Membrane	cell surface receptor
	IMM 916	NM_001124614	Oncorhynchus mykiss decoy receptor 3 protein-like (LOC100136637) mRNA_x0001_emb-AJ315137.1- Oncorhynchus mykiss partial mRNA for putative decoy receptor 3 protein	3.291	7.6e-05	TNFRSF6B		TNFRSF6B		TNF receptor superfamily member 6b	Plasma Membrane	cell surface receptor
	IMM 916	NM_001124614	Oncorhynchus mykiss decoy receptor 3 protein-like (LOC100136637) mRNA_x0001_emb-AJ315137.1- Oncorhynchus mykiss partial mRNA for putative decoy receptor 3 protein	3.118	0.000123	TNFRSF6B		TNFRSF6B		TNF receptor superfamily member 6b	Plasma Membrane	cell surface receptor
	IMM 916	NM_001124614	Oncorhynchus mykiss decoy receptor 3 protein-like (LOC100136637) mRNA_x0001_emb-AJ315137.1- Oncorhynchus mykiss partial mRNA for putative decoy receptor 3 protein	2.933	0.000178	TNFRSF6B		TNFRSF6B		TNF receptor superfamily member 6b	Plasma Membrane	cell surface receptor
	TC132470	NM_001124565	Oncorhynchus mykiss TNF superfamily member 10-like protein (LOC100136317) mRNA_x0001_gb-DQ218468.1- Oncorhynchus mykiss TNF superfamily member 10-like protein mRNA complete cds	-1.007	0.001162	TNFSF10		TNFSF10	-1.15	TNF superfamily member 10	Extracellular Space	cytokine
	TC139579	NM_001124565	Oncorhynchus mykiss TNF superfamily member 10-like protein (LOC100136317) mRNA_x0001_gb-DQ218468.1- Oncorhynchus mykiss TNF superfamily member 10-like protein mRNA complete cds	-1.293	4.6e-05	TNFSF10		TNFSF10		TNF superfamily member 10	Extracellular Space	cytokine
	TC152793	BT044692	Salmo salar clone ssal-rgf-002-373 Tob1 putative mRNA complete cds	1.186	0.000568	TOB1		TOB1	1.174	transducer of ERBB2, 1	Nucleus	transcription regulator
	TC155471	CR846974	Takifugu rubripes DNA highly conserved vertebrate non-coding sequence element ID CNE870	1.162	0.000467	TOB1		TOB1		transducer of ERBB2, 1	Nucleus	transcription regulator
	CUST_133_PI420312184	NM_001160506	Oncorhynchus mykiss fish virus induced TRIM protein (fintrim) mRNA	-1.005	0.00087	TRIM16		TRIM16	-1.0585	tripartite motif containing 16	Cytoplasm	transcription regulator
	TC164173	AY696631	Pagrus major clone cmcon023 microsatellite sequence	-1.03	0.000532	TRIM16		TRIM16		tripartite motif containing 16	Cytoplasm	transcription regulator
	TC170729	AM887813	Oncorhynchus mykiss mRNA for fish virus induced TRIM protein (finTRIM gene) clone mLV9	-1.056	0.000225	TRIM16		TRIM16		tripartite motif containing 16	Cytoplasm	transcription regulator
	TC150152	AM887824	Oncorhynchus mykiss mRNA for fish virus induced TRIM protein (finTRIM gene) clone RTG17	-1.143	0.000212	TRIM16		TRIM16		tripartite motif containing 16	Cytoplasm	transcription regulator
	TC141381	NM_001140940	Salmo salar Twist-related protein 2 (twst2) mRNA_x0001_gb-BT047611.1- Salmo salar clone ssal-eve-509-368 Twist-related protein 2 putative mRNA complete cds	1.058	0.000561	TWIST2		TWIST2	1.054	twist family bHLH transcription factor 2	Nucleus	transcription regulator
	TC139987	NM_001140940	Salmo salar Twist-related protein 2 (twst2) mRNA_x0001_gb-BT047611.1- Salmo salar clone ssal-eve-509-368 Twist-related protein 2 putative mRNA complete cds	1.05	0.000396	TWIST2		TWIST2		twist family bHLH transcription factor 2	Nucleus	transcription regulator
	TC145083	BT058954	Salmo salar clone ssal-rgf-515-371 Thioredoxin-interacting protein putative mRNA complete cds	-1.178	0.000286	TXNIP		TXNIP	-1.6235	thioredoxin interacting protein	Cytoplasm	other
	TC169214	NM_001140431	Salmo salar thioredoxin interacting protein (txnip) mRNA_x0001_gb-BT045851.1- Salmo salar clone ssal-rgf-534-292 Thioredoxin-interacting protein putative mRNA complete cds	-2.069	0.006016	TXNIP		TXNIP		thioredoxin interacting protein	Cytoplasm	other
	TC164235	BT072601	Salmo salar clone ssal-rgf-532-043 Thioredoxin reductase 1 cytoplasmic putative mRNA pseudogene cds	1.795	0.000199	TXNRD1		TXNRD1	1.528	thioredoxin reductase 1	Cytoplasm	enzyme
	TC139648	BT072601	Salmo salar clone ssal-rgf-532-043 Thioredoxin reductase 1 cytoplasmic putative mRNA pseudogene cds	1.261	0.000113	TXNRD1		TXNRD1		thioredoxin reductase 1	Cytoplasm	enzyme
	TC145001	BT047062	Salmo salar clone ssal-sjb-011-116 Ubiquitin-conjugating enzyme E2 D2 putative mRNA complete cds	2.787	0.003913	UBE2D2		UBE2D2	1.82233	ubiquitin conjugating enzyme E2 D2	Cytoplasm	enzyme
	TC147791	BT045035	Salmo salar clone ssal-rgf-510-148 Ubiquitin-conjugating enzyme E2 D2 putative mRNA complete cds	1.358	0.000937	UBE2D2		UBE2D2		ubiquitin conjugating enzyme E2 D2	Cytoplasm	enzyme
	TC160822	BT049960	Salmo salar clone ssal-evd-535-167 Ubiquitin-conjugating enzyme E2 D2 putative mRNA complete cds	1.322	0.00498	UBE2D2		UBE2D2		ubiquitin conjugating enzyme E2 D2	Cytoplasm	enzyme
	TC133224	BT056431	Salmo salar clone ssal-evd-550-363 Uridine-cytidine kinase 2 putative mRNA complete cds	1.69	0.001362	UCK2		UCK2	1.6445	uridine-cytidine kinase 2	Cytoplasm	kinase
	TC168585	BT056431	Salmo salar clone ssal-evd-550-363 Uridine-cytidine kinase 2 putative mRNA complete cds	1.599	0.000391	UCK2		UCK2		uridine-cytidine kinase 2	Cytoplasm	kinase
	TC164478	BT072290	Salmo salar clone ssal-rgf-519-358 Ubiquitin carboxyl-terminal hydrolase 4 putative mRNA partial cds	1.193	0.043642	USP4		USP4	1.192	ubiquitin specific peptidase 4	Nucleus	peptidase
	TC143849	BT072290	Salmo salar clone ssal-rgf-519-358 Ubiquitin carboxyl-terminal hydrolase 4 putative mRNA partial cds	1.191	0.000288	USP4		USP4		ubiquitin specific peptidase 4	Nucleus	peptidase
	TC149113	XM_688124	PREDICTED: Danio rerio si:ch211-153j24.6 (si:ch211-153j24.6) mRNA	1.138	0.001495	WDR26		WDR26	1.1095	WD repeat domain 26	Cytoplasm	other
	TC134522	XM_688124	PREDICTED: Danio rerio si:ch211-153j24.6 (si:ch211-153j24.6) mRNA	1.081	0.000534	WDR26		WDR26		WD repeat domain 26	Cytoplasm	other
	TC135287	BT072144	Salmo salar clone ssal-rgf-513-265 WD repeat-containing protein 43 putative mRNA pseudogene cds	1.72	2.9e-05	WDR43		WDR43	1.542	WD repeat domain 43	Nucleus	transcription regulator
	TC158342	BT072144	Salmo salar clone ssal-rgf-513-265 WD repeat-containing protein 43 putative mRNA pseudogene cds	1.7	0.00533	WDR43		WDR43		WD repeat domain 43	Nucleus	transcription regulator
	TC139918	BT072144	Salmo salar clone ssal-rgf-513-265 WD repeat-containing protein 43 putative mRNA pseudogene cds	1.206	0.016589	WDR43		WDR43		WD repeat domain 43	Nucleus	transcription regulator
	TC161497	NM_001140462	Salmo salar Methylosome protein 50 (mep50) mRNA_x0001_gb-BT045904.1- Salmo salar clone ssal-rgf-536-134 Methylosome protein 50 putative mRNA complete cds	2.133	1e-06	WDR77		WDR77	1.91375	WD repeat domain 77	Nucleus	transcription regulator
	TC158434	NM_001140462	Salmo salar Methylosome protein 50 (mep50) mRNA_x0001_gb-BT045904.1- Salmo salar clone ssal-rgf-536-134 Methylosome protein 50 putative mRNA complete cds	1.935	0.002166	WDR77		WDR77		WD repeat domain 77	Nucleus	transcription regulator
	TC161227	NM_001140462	Salmo salar Methylosome protein 50 (mep50) mRNA_x0001_gb-BT045904.1- Salmo salar clone ssal-rgf-536-134 Methylosome protein 50 putative mRNA complete cds	1.844	3e-06	WDR77		WDR77		WD repeat domain 77	Nucleus	transcription regulator
	TC140052	NM_001140462	Salmo salar Methylosome protein 50 (mep50) mRNA_x0001_gb-BT045904.1- Salmo salar clone ssal-rgf-536-134 Methylosome protein 50 putative mRNA complete cds	1.743	2e-06	WDR77		WDR77		WD repeat domain 77	Nucleus	transcription regulator
	TC171660	NM_001124471	Oncorhynchus mykiss 14-3-3C2 protein (LOC100136195) mRNA_x0001_gb-AY370882.1- Oncorhynchus mykiss 14-3-3C2 protein mRNA complete cds	2.396	7e-06	YWHAZ		YWHAZ	1.45433	tyrosine 3-monooxygenase/tryptophan 5-monooxygenase activation protein zeta	Cytoplasm	enzyme
	TC164678	BT060133	Salmo salar clone ssal-rgh-505-023 14-3-3 protein zeta putative mRNA complete cds	1.515	0.000475	YWHAZ		YWHAZ		tyrosine 3-monooxygenase/tryptophan 5-monooxygenase activation protein zeta	Cytoplasm	enzyme
	TC150486	BT060133	Salmo salar clone ssal-rgh-505-023 14-3-3 protein zeta putative mRNA complete cds	1.456	9.7e-05	YWHAZ		YWHAZ		tyrosine 3-monooxygenase/tryptophan 5-monooxygenase activation protein zeta	Cytoplasm	enzyme
	TC171584	BT060133	Salmo salar clone ssal-rgh-505-023 14-3-3 protein zeta putative mRNA complete cds	1.165	0.004358	YWHAZ		YWHAZ		tyrosine 3-monooxygenase/tryptophan 5-monooxygenase activation protein zeta	Cytoplasm	enzyme
	TC163942	NM_001124470	Oncorhynchus mykiss 14-3-3C1 protein (LOC100136194) mRNA_x0001_gb-AY370881.1- Oncorhynchus mykiss 14-3-3C1 protein mRNA complete cds	1.104	0.001188	YWHAZ		YWHAZ		tyrosine 3-monooxygenase/tryptophan 5-monooxygenase activation protein zeta	Cytoplasm	enzyme
	TC156427	BT060133	Salmo salar clone ssal-rgh-505-023 14-3-3 protein zeta putative mRNA complete cds	1.09	0.000475	YWHAZ		YWHAZ		tyrosine 3-monooxygenase/tryptophan 5-monooxygenase activation protein zeta	Cytoplasm	enzyme
	TC167974	BT059498	Salmo salar clone ssal-rgf-524-168 AN1-type zinc finger protein 5 putative mRNA complete cds	1.607	5.1e-05	ZFAND5		ZFAND5	1.391	zinc finger AN1-type containing 5	Nucleus	other
	TC135980	BT056540	Salmo salar clone ssal-evf-005-156 AN1-type zinc finger protein 5 putative mRNA complete cds	1.56	0.003611	ZFAND5		ZFAND5		zinc finger AN1-type containing 5	Nucleus	other
	TC137706	BT045183	Salmo salar clone ssal-rgf-514-142 AN1-type zinc finger protein 5 putative mRNA complete cds	1.497	0.021678	ZFAND5		ZFAND5		zinc finger AN1-type containing 5	Nucleus	other
	TC162066	BT045183	Salmo salar clone ssal-rgf-514-142 AN1-type zinc finger protein 5 putative mRNA complete cds	1.403	2.2e-05	ZFAND5		ZFAND5		zinc finger AN1-type containing 5	Nucleus	other
	TC160878	BT045183	Salmo salar clone ssal-rgf-514-142 AN1-type zinc finger protein 5 putative mRNA complete cds	1.233	4e-05	ZFAND5		ZFAND5		zinc finger AN1-type containing 5	Nucleus	other
	TC158556	BT056540	Salmo salar clone ssal-evf-005-156 AN1-type zinc finger protein 5 putative mRNA complete cds	1.046	0.004382	ZFAND5		ZFAND5		zinc finger AN1-type containing 5	Nucleus	other
	TC155131	NM_001140451	Salmo salar Butyrate response factor 1 (tisb) mRNA_x0001_gb-BT045883.1- Salmo salar clone ssal-rgf-535-262 Butyrate response factor 1 putative mRNA complete cds	1.203	0.000686	ZFP36L1		ZFP36L1	1.124	ZFP36 ring finger protein like 1	Nucleus	transcription regulator
	TC139562	NM_001140451	Salmo salar Butyrate response factor 1 (tisb) mRNA_x0001_gb-BT045883.1- Salmo salar clone ssal-rgf-535-262 Butyrate response factor 1 putative mRNA complete cds	1.045	0.000471	ZFP36L1		ZFP36L1		ZFP36 ring finger protein like 1	Nucleus	transcription regulator
	TC142517	BT057902	Salmo salar clone ssal-evd-503-154 Zymogen granule membrane protein 16 precursor putative mRNA complete cds	-1.537	0.000123	ZG16		ZG16	-1.971	zymogen granule protein 16	Extracellular Space	other
	TC148127	BT075773	Caligus rogercresseyi clone crog-evp-519-176 Zymogen granule membrane protein 16 precursor putative mRNA complete cds	-1.583	6.8e-05	ZG16		ZG16		zymogen granule protein 16	Extracellular Space	other
	TC151830	BT057545	Salmo salar clone ssal-evd-529-189 Zymogen granule membrane protein 16 precursor putative mRNA complete cds	-2.793	0.000817	ZG16		ZG16		zymogen granule protein 16	Extracellular Space	other
	TC150444	BT047593	Salmo salar clone ssal-eve-564-085 Zinc finger protein ZPR1 putative mRNA complete cds	1.893	0.000116	ZNF259		ZPR1	1.635	ZPR1 zinc finger	Nucleus	other
	TC164236	BT074564	Osmerus mordax clone omor-eva-504-037 Zinc-finger protein ZPR1 putative mRNA complete cds	1.377	3.5e-05	ZNF259		ZPR1		ZPR1 zinc finger	Nucleus	other
	TC171536	not-annotated	not-annotated	-1.228	0.000237	ZNF79		ZNF79	-1.562	zinc finger protein 79	Nucleus	transcription regulator
	TC164819	NM_001146648	Salmo salar Zinc finger protein 391 (zn391) mRNA_x0001_gb-BT056386.1- Salmo salar clone ssal-eve-563-079 Zinc finger protein 391 putative mRNA complete cds	-1.896	0.000159	ZNF79		ZNF79		zinc finger protein 79	Nucleus	transcription regulator
	Multiple RNA targets mapped to the same HGNC gene identifier (multiple RNA targets → 1 HGNC gene identifier), with the opposite direction of change (excluded from functional analysis of gene expression)
	TC145781	FJ969488	Salmo salar clone BAC CHORI214-114L13 von Willebrand factor A domain containing 5A (VWA5A) gene complete cds; gaps in BAC sequence with unknown sequence contribute to premature stops in the CDS (VWA5A-like protein) pseudogene complete sequence; and MHC class I antigen (Sasa-SAA) gene Sasa-SAA*0101 allele and v-akt murine thymoma viral oncogene 2-like protein (AKT2) gene complete cds	2.239	4.9e-05	AKT2
	TC137207	FJ969488	Salmo salar clone BAC CHORI214-114L13 von Willebrand factor A domain containing 5A (VWA5A) gene complete cds; gaps in BAC sequence with unknown sequence contribute to premature stops in the CDS (VWA5A-like protein) pseudogene complete sequence; and MHC class I antigen (Sasa-SAA) gene Sasa-SAA*0101 allele and v-akt murine thymoma viral oncogene 2-like protein (AKT2) gene complete cds	1.403	1.9e-05	AKT2
	TC146918	FJ969488	Salmo salar clone BAC CHORI214-114L13 von Willebrand factor A domain containing 5A (VWA5A) gene complete cds; gaps in BAC sequence with unknown sequence contribute to premature stops in the CDS (VWA5A-like protein) pseudogene complete sequence; and MHC class I antigen (Sasa-SAA) gene Sasa-SAA*0101 allele and v-akt murine thymoma viral oncogene 2-like protein (AKT2) gene complete cds	-1.211	0.000269	AKT2
	TC152352	FJ969488	Salmo salar clone BAC CHORI214-114L13 von Willebrand factor A domain containing 5A (VWA5A) gene complete cds; gaps in BAC sequence with unknown sequence contribute to premature stops in the CDS (VWA5A-like protein) pseudogene complete sequence; and MHC class I antigen (Sasa-SAA) gene Sasa-SAA*0101 allele and v-akt murine thymoma viral oncogene 2-like protein (AKT2) gene complete cds	-1.267	9.7e-05	AKT2
	TC172521	FJ969488	Salmo salar clone BAC CHORI214-114L13 von Willebrand factor A domain containing 5A (VWA5A) gene complete cds; gaps in BAC sequence with unknown sequence contribute to premature stops in the CDS (VWA5A-like protein) pseudogene complete sequence; and MHC class I antigen (Sasa-SAA) gene Sasa-SAA*0101 allele and v-akt murine thymoma viral oncogene 2-like protein (AKT2) gene complete cds	-1.325	0.03175	AKT2
	TC141632	BT072558	Salmo salar clone ssal-rgf-530-149 CD166 antigen homolog precursor putative mRNA partial cds	2.141	1.1e-05	ALCAM
	TC162246	BT072558	Salmo salar clone ssal-rgf-530-149 CD166 antigen homolog precursor putative mRNA partial cds	1.085	0.000174	ALCAM
	TC161024	BT072099	Salmo salar clone ssal-rgf-511-243 CD166 antigen homolog precursor putative mRNA pseudogene cds	-1.209	0.001393	ALCAM
	TC141478	DQ156149	Salmo salar clone BAC S0085O16 partial sequence	2.063	0.014948	B3GNT9
	TC172459	DQ156150	Salmo salar BAC S0188I22 partial sequence	1.895	0.001685	B3GNT9
	TC159798	DQ156149	Salmo salar clone BAC S0085O16 partial sequence	1.779	0.03824	B3GNT9
	TC152033	DQ156149	Salmo salar clone BAC S0085O16 partial sequence	1.041	0.02323	B3GNT9
	TC153752	DQ156149	Salmo salar clone BAC S0085O16 partial sequence	1.039	0.00067	B3GNT9
	TC155935	DQ156151	Oncorhynchus mykiss BAC 127C24 partial sequence	-1.022	0.003412	B3GNT9
	TC158206	DQ156149	Salmo salar clone BAC S0085O16 partial sequence	-1.053	0.000156	B3GNT9
	TC143661	DQ156150	Salmo salar BAC S0188I22 partial sequence	-1.055	0.003622	B3GNT9
	TC157482	DQ156149	Salmo salar clone BAC S0085O16 partial sequence	-1.122	0.009894	B3GNT9
	TC166389	DQ156149	Salmo salar clone BAC S0085O16 partial sequence	-1.129	0.00055	B3GNT9
	TC143981	DQ156149	Salmo salar clone BAC S0085O16 partial sequence	-1.162	0.02883	B3GNT9
	TC158917	DQ156149	Salmo salar clone BAC S0085O16 partial sequence	-1.185	0.000305	B3GNT9
	TC168687	DQ156149	Salmo salar clone BAC S0085O16 partial sequence	-1.223	0.01574	B3GNT9
	TC159775	DQ156150	Salmo salar BAC S0188I22 partial sequence	-1.262	0.000104	B3GNT9
	TC146152	DQ156150	Salmo salar BAC S0188I22 partial sequence	-2.462	1e-06	B3GNT9
	TC144188	not-annotated	not-annotated	2.143	0.025845	C10orf11
	TC136575	NM_001020701	Danio rerio c10orf11 homolog (H. sapiens) (c10orf11) mRNA_x0001_gb-BC095822.1- Danio rerio c10orf11 homolog (H. sapiens) mRNA (cDNA clone MGC:112463 IMAGE:7407095) complete cds	-1.468	0.013084	C10orf11
	TC144728	GU588073	Ictalurus furcatus clone CBZC5179 upf0468 protein c16orf80-like protein (CP080) mRNA complete cds	1.309	3.1e-05	C16orf80
	TC170071	GU588073	Ictalurus furcatus clone CBZC5179 upf0468 protein c16orf80-like protein (CP080) mRNA complete cds	-2.623	0.018136	C16orf80
	TC166783	L24433	Oncorhynchus mykiss complement component C3 mRNA partial cds	6.944	0.00015	C3
	TC167563	L24433	Oncorhynchus mykiss complement component C3 mRNA partial cds	1.49	0.01259	C3
	TC159878	U61753	Oncorhynchus mykiss complement component C3-3 mRNA partial cds	-1.477	0.047327	C3
	TC155519	U61753	Oncorhynchus mykiss complement component C3-3 mRNA partial cds	-2.389	0.011132	C3
	TC157286	BT072197	Salmo salar clone ssal-rgf-516-138 OX-2 membrane glycoprotein precursor putative mRNA pseudogene cds	1.091	0.000747	CD200
	TC150694	HM190257	Oncorhynchus mykiss CD200 mRNA partial cds	-1.396	0.000103	CD200
	TC144472	BT059171	Salmo salar clone ssal-rgf-529-373 Cold-inducible RNA-binding protein putative mRNA complete cds	1.208	6.3e-05	CIRBP
	TC170214	BT059171	Salmo salar clone ssal-rgf-529-373 Cold-inducible RNA-binding protein putative mRNA complete cds	-4.842	0.013184	CIRBP
	TC137327	BT028585	Gasterosteus aculeatus clone CNB255-G04 mRNA sequence	1.089	0.000754	CIRH1A
	TC162530	NM_001200367	Ictalurus punctatus chromosome transmission fidelity protein 8-like protein (ctf8) mRNA_x0001_gb-GU588505.1- Ictalurus punctatus clone CBPN22852 chromosome transmission fidelity protein 8-like protein (CTF8) mRNA complete cds	-1.219	0.000647	CIRH1A
	TC143884	BT049216	Salmo salar clone ssal-eve-502-340 Claudin-4 putative mRNA complete cds	1.769	7e-06	CLDN4
	TC134765	BT047482	Salmo salar clone ssal-evd-531-040 Claudin-4 putative mRNA complete cds	1.008	0.005075	CLDN4
	TC147167	BT048350	Salmo salar clone ssal-eve-537-043 Claudin-4 putative mRNA complete cds	-1.596	1.6e-05	CLDN4
	TC163230	NM_001124406	Oncorhynchus mykiss chemokine receptor-like protein 1 (LOC100136107) mRNA_x0001_emb-AJ620468.1- Oncorhynchus mykiss mRNA for chemokine receptor-like protein 1	1.476	0.000317	CMKLR1
	IMM 111	NM_001124406	Oncorhynchus mykiss chemokine receptor-like protein 1 (LOC100136107) mRNA_x0001_emb-AJ620468.1- Oncorhynchus mykiss mRNA for chemokine receptor-like protein 1	1.45	0.009865	CMKLR1
	IMM 451	NM_001124406	Oncorhynchus mykiss chemokine receptor-like protein 1 (LOC100136107) mRNA_x0001_emb-AJ620468.1- Oncorhynchus mykiss mRNA for chemokine receptor-like protein 1	1.277	0.002521	CMKLR1
	TC147168	BT074452	Osmerus mordax clone omor-rgc-518-339 Chemokine receptor-like 1 putative mRNA complete cds	1.1	0.000199	CMKLR1
	IMM 451	NM_001124406	Oncorhynchus mykiss chemokine receptor-like protein 1 (LOC100136107) mRNA_x0001_emb-AJ620468.1- Oncorhynchus mykiss mRNA for chemokine receptor-like protein 1	1.069	0.01661	CMKLR1
	TC160138	BT047457	Salmo salar clone ssal-evd-532-192 Chemokine receptor-like 1 putative mRNA complete cds	-1.008	0.004228	CMKLR1
	TC166663	AC187702	Gasterosteus aculeatus clone VMRC26-150C14 complete sequence	1.695	2e-06	CXCR7
	TC168792	AC187702	Gasterosteus aculeatus clone VMRC26-150C14 complete sequence	-2.615	0.040519	CXCR7
	TC155728	NM_001165387	Salmo salar death-associated protein kinase 3 (dapk3) mRNA_x0001_gb-BT058912.1- Salmo salar clone ssal-rgf-512-355 Death-associated protein kinase 3 putative mRNA complete cds	1.288	0.001167	DAPK3
	TC151235	NM_001165387	Salmo salar death-associated protein kinase 3 (dapk3) mRNA_x0001_gb-BT058912.1- Salmo salar clone ssal-rgf-512-355 Death-associated protein kinase 3 putative mRNA complete cds	-1.357	0.00969	DAPK3
	TC142875	BT125212	Salmo salar clone ssal-rgb2-528-166 Acyl-CoA-binding protein putative mRNA complete cds	1.323	0.010662	DBI
	TC160612	BT125212	Salmo salar clone ssal-rgb2-528-166 Acyl-CoA-binding protein putative mRNA complete cds	-1.513	0.010409	DBI
	TC142192	BT050375	Salmo salar clone ssal-rgf-535-024 Eukaryotic translation initiation factor 1b putative mRNA complete cds	1.562	8e-06	EIF1B
	TC139779	BT056792	Salmo salar clone ssal-eve-558-331 Eukaryotic translation initiation factor 1b putative mRNA complete cds	1.484	5e-06	EIF1B
	TC148015	NM_001165193	Oncorhynchus mykiss eukaryotic translation initiation factor 1B (eif1b) mRNA_x0001_gb-BT074268.1- Oncorhynchus mykiss clone omyk-evo-513-346 Eukaryotic translation initiation factor 1b putative mRNA complete cds	1.48	5e-06	EIF1B
	TC164598	BT050375	Salmo salar clone ssal-rgf-535-024 Eukaryotic translation initiation factor 1b putative mRNA complete cds	-2.551	0.002341	EIF1B
	TC152130	BT059114	Salmo salar clone ssal-rgf-526-102 Glyceraldehyde-3-phosphate dehydrogenase putative mRNA complete cds	1.173	0.000382	GAPDH
	TC161791	NM_001124209	Oncorhynchus mykiss glyceraldehyde 3-phosphate dehydrogenase (LOC100135813) mRNA_x0001_dbj-AB066373.1- Oncorhynchus mykiss mRNA for glyceraldehyde 3-phosphate dehydrogenase complete cds	-1.242	0.01763	GAPDH
	TC152401	AC203456	Salmo salar BAC CH214-397C7 (Children's Hospital Oakland Research Institute Atlantic Salmon BAC Library) complete sequence	1.361	0.047731	GGA3
	TC154161	AC203456	Salmo salar BAC CH214-397C7 (Children's Hospital Oakland Research Institute Atlantic Salmon BAC Library) complete sequence	1.241	4.4e-05	GGA3
	TC146356	AC203456	Salmo salar BAC CH214-397C7 (Children's Hospital Oakland Research Institute Atlantic Salmon BAC Library) complete sequence	1.071	0.007648	GGA3
	TC150815	AC203456	Salmo salar BAC CH214-397C7 (Children's Hospital Oakland Research Institute Atlantic Salmon BAC Library) complete sequence	-1.018	0.002332	GGA3
	TC169269	AC203456	Salmo salar BAC CH214-397C7 (Children's Hospital Oakland Research Institute Atlantic Salmon BAC Library) complete sequence	-1.883	4.2e-05	GGA3
	TC171598	AC203456	Salmo salar BAC CH214-397C7 (Children's Hospital Oakland Research Institute Atlantic Salmon BAC Library) complete sequence	-1.897	7e-06	GGA3
	TC145822	AC203456	Salmo salar BAC CH214-397C7 (Children's Hospital Oakland Research Institute Atlantic Salmon BAC Library) complete sequence	-2.047	4e-06	GGA3
	TC146992	AC203456	Salmo salar BAC CH214-397C7 (Children's Hospital Oakland Research Institute Atlantic Salmon BAC Library) complete sequence	-2.525	2e-06	GGA3
	TC147028	BT073882	Oncorhynchus mykiss clone omyk-evo-508-262 GTPase IMAP family member 7 putative mRNA complete cds	1.146	0.00901	GIMAP7
	TC133177	BT076905	Caligus rogercresseyi clone crog-evp-518-175 GTPase IMAP family member 7 putative mRNA complete cds	-2.055	2.1e-05	GIMAP7
	TC162574	NM_001139959	Salmo salar HEXIM protein (hexim) mRNA_x0001_gb-BT044960.1- Salmo salar clone ssal-rgf-508-208 HEXIM putative mRNA complete cds	1.333	3.5e-05	HEXIM1
	TC149740	NM_001139959	Salmo salar HEXIM protein (hexim) mRNA_x0001_gb-BT044960.1- Salmo salar clone ssal-rgf-508-208 HEXIM putative mRNA complete cds	-1.243	0.03385	HEXIM1
	TC151972	EU025707	Salmo salar homeobox protein HoxB13ab (HoxB13ab) homeobox protein HoxB10ab (HoxB10ab) homeobox protein HoxB9ab (HoxB9ab) homeobox protien HoxB8ab (HoxB8ab) homeobox protien HoxB7ab (HoxB7ab) homeobox protien HoxB6ab (HoxB6ab) homeobox protien HoxB5ab (HoxB5ab) homeobox protien HoxB4ab (HoxB4ab) homeobox protien HoxB3ab (HoxB3ab) homeobox protien HoxB2ab (HoxB2ab) and homeobox protien HoxB1ab (Hox…	1.355	0.000211	HOXB3
	TC141192	EU025706	Salmo salar homeobox protein HoxB9aa (HoxB9aa) homeobox protein HoxB8aa (HoxB8aa) homeobox protein HoxB7aa (HoxB7aa) homeobox protein HoxB6aa (HoxB6aa) homeobox protein HoxB5aa (HoxB5aa) homeobox protein HoxB4aa (HoxB4aa) homeobox protein HoxB3aa (HoxB3aa) homeobox protein HoxB2aa (HoxB2aa) and homeobox protein HoxB1aa (HoxB1aa) genes complete cds	-1.273	0.034739	HOXB3
	TC142536	EU025717	Salmo salar coiled-coil transcriptional coactivator b (Kiaa1536) homeobox protein HoxC13bb (HoxC13bb) homeobox protein HoxC12bb (HoxC12bb) and homeobox protein HoxC11bb (HoxC11bb) genes complete cds; HoxC10bb (HoxC10bb) pseudogene partial sequence; and homeobox protein HoxC9bb (HoxC9bb) homeobox protein HoxC8bb (HoxC8bb) homeobox protein HoxC6bb (HoxC6bb) homeobox protein HoxC5bb (HoxC5bb) homeob…	1.464	0.040082	HOXC13
	TC170763	EU025716	Salmo salar retinoic acid receptor gamma b (Rargb) gene partial cds; and homeobox protein HoxC13ba (HoxC13ba) homeobox protein HoxC12ba (HoxC12ba) homeobox protein HoxC11ba (HoxC11ba) homeobox protein HoxC10ba (HoxC10ba) homeobox protein HoxC9ba (HoxC9ba) homeobox protein HoxC8ba (HoxC8ba) homeobox protein HoxC6ba (HoxC6ba) homeobox protein HoxC5ba (HoxC5ba) and homeobox protein HoxC4ba (HoxC4ba)…	1.09	0.000816	HOXC13
	TC158032	EU025716	Salmo salar retinoic acid receptor gamma b (Rargb) gene partial cds; and homeobox protein HoxC13ba (HoxC13ba) homeobox protein HoxC12ba (HoxC12ba) homeobox protein HoxC11ba (HoxC11ba) homeobox protein HoxC10ba (HoxC10ba) homeobox protein HoxC9ba (HoxC9ba) homeobox protein HoxC8ba (HoxC8ba) homeobox protein HoxC6ba (HoxC6ba) homeobox protein HoxC5ba (HoxC5ba) and homeobox protein HoxC4ba (HoxC4ba)…	-1.025	0.002753	HOXC13
	TC159211	EU025717	Salmo salar coiled-coil transcriptional coactivator b (Kiaa1536) homeobox protein HoxC13bb (HoxC13bb) homeobox protein HoxC12bb (HoxC12bb) and homeobox protein HoxC11bb (HoxC11bb) genes complete cds; HoxC10bb (HoxC10bb) pseudogene partial sequence; and homeobox protein HoxC9bb (HoxC9bb) homeobox protein HoxC8bb (HoxC8bb) homeobox protein HoxC6bb (HoxC6bb) homeobox protein HoxC5bb (HoxC5bb) homeob…	-1.127	0.001242	HOXC13
	TC170242	EU025716	Salmo salar retinoic acid receptor gamma b (Rargb) gene partial cds; and homeobox protein HoxC13ba (HoxC13ba) homeobox protein HoxC12ba (HoxC12ba) homeobox protein HoxC11ba (HoxC11ba) homeobox protein HoxC10ba (HoxC10ba) homeobox protein HoxC9ba (HoxC9ba) homeobox protein HoxC8ba (HoxC8ba) homeobox protein HoxC6ba (HoxC6ba) homeobox protein HoxC5ba (HoxC5ba) and homeobox protein HoxC4ba (HoxC4ba)…	-1.317	0.029119	HOXC13
	TC172470	EU025714	Salmo salar retinoic acid receptor gamma a (Rarga) coiled-coil transcriptional coactivator a (Kiaa1536) homeobox protein HoxC13aa (HoxC13aa) homeobox protein HoxC12aa (HoxC12aa) homeobox protein HoxC11aa (HoxC11aa) homeobox protein HoxC10aa (HoxC10aa) homeobox protein HoxC9aa (HoxC9aa) homeobox protein HoxC8aa (HoxC8aa) and homeobox protein HoxC6aa (HoxC6aa) genes complete cds	-1.329	0.000418	HOXC13
	TC170406	EU025716	Salmo salar retinoic acid receptor gamma b (Rargb) gene partial cds; and homeobox protein HoxC13ba (HoxC13ba) homeobox protein HoxC12ba (HoxC12ba) homeobox protein HoxC11ba (HoxC11ba) homeobox protein HoxC10ba (HoxC10ba) homeobox protein HoxC9ba (HoxC9ba) homeobox protein HoxC8ba (HoxC8ba) homeobox protein HoxC6ba (HoxC6ba) homeobox protein HoxC5ba (HoxC5ba) and homeobox protein HoxC4ba (HoxC4ba)…	-1.331	0.009056	HOXC13
	TC171784	EU025716	Salmo salar retinoic acid receptor gamma b (Rargb) gene partial cds; and homeobox protein HoxC13ba (HoxC13ba) homeobox protein HoxC12ba (HoxC12ba) homeobox protein HoxC11ba (HoxC11ba) homeobox protein HoxC10ba (HoxC10ba) homeobox protein HoxC9ba (HoxC9ba) homeobox protein HoxC8ba (HoxC8ba) homeobox protein HoxC6ba (HoxC6ba) homeobox protein HoxC5ba (HoxC5ba) and homeobox protein HoxC4ba (HoxC4ba)…	-1.458	0.000498	HOXC13
	TC166508	EU025714	Salmo salar retinoic acid receptor gamma a (Rarga) coiled-coil transcriptional coactivator a (Kiaa1536) homeobox protein HoxC13aa (HoxC13aa) homeobox protein HoxC12aa (HoxC12aa) homeobox protein HoxC11aa (HoxC11aa) homeobox protein HoxC10aa (HoxC10aa) homeobox protein HoxC9aa (HoxC9aa) homeobox protein HoxC8aa (HoxC8aa) and homeobox protein HoxC6aa (HoxC6aa) genes complete cds	-1.654	1.6e-05	HOXC13
	TC166519	EU025715	Salmo salar homeobox protein HoxC13ab (HoxC13ab) homeobox protein HoxC12ab (HoxC12ab) homeobox protein HoxC11ab (HoxC11ab) homeobox protein HoxC10ab (HoxC10ab) homeobox protein HoxC9ab (HoxC9ab) homeobox protein HoxC8ab (HoxC8ab) homeobox protein HoxC6ab (HoxC6ab) homeobox protein HoxC5ab (HoxC5ab) and homeobox protein HoxC4ab (HoxC4ab) genes complete cds; homeobox protein HoxC3ab (HoxC3ab) pseud…	-2.395	0.008699	HOXC13
	TC155801	EU025719	Salmo salar lunapark (Lnp) and even-skipped homeobox 2 (Evx2) genes complete cds; HoxD13ab pseudogene complete sequence; homeobox protein HoxD12ab (HoxD12ab) homeobox protein HoxD11ab (HoxD11ab) homeobox protein HoxD10ab (HoxD10ab) homeobox protein HoxD9ab (HoxD9ab) homeobox protein HoxD4ab (HoxD4ab) and homeobox protein HoxD3ab (HoxD3ab) genes complete cds; and HoxD1ab pseudogene complete sequen…	1.545	0.000153	HOXD3
	TC149392	EU025718	Salmo salar homeobox protein HoxD13aa (HoxD13aa) gene partial sequence; and homeobox protein HoxD13aa homeobox protein HoxD12aa (HoxD12aa) homeobox protein HoxD11aa (HoxD11aa) homeobox protein HoxD10aa (HoxD10aa) homeobox protein HoxD9aa (HoxD9aa) homeobox protein HoxD4aa (HoxD4aa) homeobox protein HoxD3aa (HoxD3aa) and homeobox protein HoxD1aa (HoxD1aa) genes complete cds	-1.526	0.030857	HOXD3
	IMM 750	AF281339	Oncorhynchus mykiss hemopexin-like protein variant 1 mRNA partial cds	2.602	0.044316	HPX
	IMM 817	AF281339	Oncorhynchus mykiss hemopexin-like protein variant 1 mRNA partial cds	1.139	0.024747	HPX
	TC169206	Z68112	O.mykiss mRNA for hemopexin-like protein (tHxl)	-1.671	0.040848	HPX
	TC151743	HQ287746	Coregonus clupeaformis heat shock cognate 70 kDa protein (HSP70) gene partial cds	3.617	0	HSPA8
	TC146376	HQ287746	Coregonus clupeaformis heat shock cognate 70 kDa protein (HSP70) gene partial cds	1.716	3.5e-05	HSPA8
	TC132383	NM_001124745	Oncorhynchus mykiss heat shock protein 70b (hsp70b) mRNA_x0001_dbj-AB176855.1- Oncorhynchus mykiss HSP70b mRNA for heat shock 70kDa protein complete cds	1.701	0.003056	HSPA8
	TC166848	HQ287746	Coregonus clupeaformis heat shock cognate 70 kDa protein (HSP70) gene partial cds	1.469	4e-06	HSPA8
	TC152821	HQ287746	Coregonus clupeaformis heat shock cognate 70 kDa protein (HSP70) gene partial cds	1.046	0.003606	HSPA8
	TC167011	HQ287746	Coregonus clupeaformis heat shock cognate 70 kDa protein (HSP70) gene partial cds	-1.113	0.017705	HSPA8
	TC147409	HQ287746	Coregonus clupeaformis heat shock cognate 70 kDa protein (HSP70) gene partial cds	-1.135	0.009506	HSPA8
	TC172150	HQ287746	Coregonus clupeaformis heat shock cognate 70 kDa protein (HSP70) gene partial cds	-1.477	0.010449	HSPA8
	TC146864	AY325275	Oncorhynchus mykiss inhibitor of differentiation 1B gene promoter region and complete cds	1.353	7.5e-05	ID1
	TC152587	AY325276	Oncorhynchus mykiss inhibitor of differentiation 1C (ID1C) gene promoter region and complete cds	1.343	0.000305	ID1
	TC139476	AY842406	Oncorhynchus mykiss inhibitor of DNA binding/differentiation 1D gene complete cds	-1.031	0.000723	ID1
	TC165067	not-annotated	not-annotated	1.25	0.000577	KIAA0754
	TC134476	NM_001124687	Oncorhynchus mykiss polysialoglycoprotein (LOC100136727) mRNA_x0001_gb-J04051.1-SMOAPOPSG Rainbow trout apopolysialoglycoprotein (apoPSGP) mRNA complete cds	-1.723	0.044409	KIAA0754
	TC137344	HM159473	Salmo salar clone BAC 19C14 DOT1-like histone H3 methyltransferase pseudogene complete sequence; anti-mullerian hormone gene complete cds; ornithine decarboxylase antizyme 1 pseudogene complete sequence; oogenesis-related protein gene complete cds; and nuclear factor interleukin 3 regulated pseudogene complete sequence	2.335	4e-06	LINGO3
	TC160189	HM159473	Salmo salar clone BAC 19C14 DOT1-like histone H3 methyltransferase pseudogene complete sequence; anti-mullerian hormone gene complete cds; ornithine decarboxylase antizyme 1 pseudogene complete sequence; oogenesis-related protein gene complete cds; and nuclear factor interleukin 3 regulated pseudogene complete sequence	2.063	2e-06	LINGO3
	TC134445	HM159473	Salmo salar clone BAC 19C14 DOT1-like histone H3 methyltransferase pseudogene complete sequence; anti-mullerian hormone gene complete cds; ornithine decarboxylase antizyme 1 pseudogene complete sequence; oogenesis-related protein gene complete cds; and nuclear factor interleukin 3 regulated pseudogene complete sequence	1.801	0.025557	LINGO3
	TC155150	HM159473	Salmo salar clone BAC 19C14 DOT1-like histone H3 methyltransferase pseudogene complete sequence; anti-mullerian hormone gene complete cds; ornithine decarboxylase antizyme 1 pseudogene complete sequence; oogenesis-related protein gene complete cds; and nuclear factor interleukin 3 regulated pseudogene complete sequence	1.447	0.001265	LINGO3
	TC156552	HM159473	Salmo salar clone BAC 19C14 DOT1-like histone H3 methyltransferase pseudogene complete sequence; anti-mullerian hormone gene complete cds; ornithine decarboxylase antizyme 1 pseudogene complete sequence; oogenesis-related protein gene complete cds; and nuclear factor interleukin 3 regulated pseudogene complete sequence	-1.06	0.000418	LINGO3
	TC157462	HM159473	Salmo salar clone BAC 19C14 DOT1-like histone H3 methyltransferase pseudogene complete sequence; anti-mullerian hormone gene complete cds; ornithine decarboxylase antizyme 1 pseudogene complete sequence; oogenesis-related protein gene complete cds; and nuclear factor interleukin 3 regulated pseudogene complete sequence	-1.307	0.000267	LINGO3
	TC172195	NM_001013445	Danio rerio zgc:101523 (zgc:101523) mRNA_x0001_gb-BC090814.1- Danio rerio zgc:101523 mRNA (cDNA clone MGC:101523 IMAGE:2643171) complete cds	1.071	0.000785	LRRC1
	TC170278	NM_001013445	Danio rerio zgc:101523 (zgc:101523) mRNA_x0001_gb-BC090814.1- Danio rerio zgc:101523 mRNA (cDNA clone MGC:101523 IMAGE:2643171) complete cds	-1.246	0.000306	LRRC1
	TC144353	DQ789367	Oncorhynchus mykiss nonclassical MHC class I antigen (Onmy-LEA) gene Onmy-LEA*0101 allele and nonclassical MHC class I antigen (Onmy-LCA) gene Onmy-LCA-Onmy-LEA*0101 allele partial cds	1.594	0.017212	MR1
	TC155871	DQ789367	Oncorhynchus mykiss nonclassical MHC class I antigen (Onmy-LEA) gene Onmy-LEA*0101 allele and nonclassical MHC class I antigen (Onmy-LCA) gene Onmy-LCA-Onmy-LEA*0101 allele partial cds	-1.223	0.000538	MR1
	TC133032	FR688126	Oncorhynchus mykiss partial mRNA for MHC class I alpha chain (oncmyk-UBA gene) isolate B25	-1.225	0.038034	MR1
	TC132378	AB162342	Oncorhynchus mykiss genes MHC class I a region complete and partial cds	-1.233	0.003149	MR1
	IMM 840	FR688125	Oncorhynchus mykiss partial mRNA for MHC class I alpha chain (oncmyk-UBA gene) isolate A32	-1.368	0.028599	MR1
	IMM 840	FR688125	Oncorhynchus mykiss partial mRNA for MHC class I alpha chain (oncmyk-UBA gene) isolate A32	-1.384	0.026649	MR1
	IMM 840	FR688125	Oncorhynchus mykiss partial mRNA for MHC class I alpha chain (oncmyk-UBA gene) isolate A32	-1.644	0.009635	MR1
	TC132567	FR688119	Oncorhynchus mykiss partial mRNA for MHC class I alpha chain (oncmyk-UBA gene) isolate A3	-3.617	0.013577	MR1
	TC157271	XM_001920063	PREDICTED: Danio rerio myosin heavy polypeptide 9b non-muscle (myh9b) partial mRNA	3.009	0.009429	MYH9
	TC163358	XM_682888	PREDICTED: Danio rerio wu:fi04f09 (wu:fi04f09) mRNA	-1.431	0.044321	MYH9
	IMM 896	AJ300555	Oncorhynchus mykiss mRNA for inducible nitric oxide synthase (iNOS gene)	2.978	0.030138	NOS2
	TC168435	AJ300555	Oncorhynchus mykiss mRNA for inducible nitric oxide synthase (iNOS gene)	-1.045	0.028889	NOS2
	TC144275	HM159470	Salmo salar clone BAC 105M10 orphan nuclear receptor Dax-1 (Dax1) gene complete cds	1.432	4.4e-05	NR0B1
	TC137397	HM159470	Salmo salar clone BAC 105M10 orphan nuclear receptor Dax-1 (Dax1) gene complete cds	1.128	0.03399	NR0B1
	TC154854	HM159470	Salmo salar clone BAC 105M10 orphan nuclear receptor Dax-1 (Dax1) gene complete cds	-1.348	0.000586	NR0B1
	TC164822	EU481821	Salmo salar physical map contig 483 genomic sequence	2.227	2.2e-05	NR2F2
	TC152212	EU481821	Salmo salar physical map contig 483 genomic sequence	-1.637	0.003272	NR2F2
	TC170355	EU481821	Salmo salar physical map contig 483 genomic sequence	-2.378	1.7e-05	NR2F2
	TC145491	BT048615	Salmo salar clone ssal-evf-523-312 C6orf130 putative mRNA complete cds	-1.178	0.003272	OARD1
	TC136555	BT048172	Salmo salar clone ssal-sjb-009-295 C6orf130 homolog putative mRNA complete cds	-1.42	0.000554	OARD1
	TC170752	AY872256	Oncorhynchus mykiss IgH.A locus partial sequence	1.693	0.033426	PGBD4
	TC171340	AY872256	Oncorhynchus mykiss IgH.A locus partial sequence	1.238	0.008039	PGBD4
	TC133035	BT071950	Salmo salar clone ssal-rgf-504-336 PiggyBac transposable element-derived protein 4 putative mRNA pseudogene cds	-1.212	0.016434	PGBD4
	TC134724	NM_001160568	Oncorhynchus mykiss Calcineurin subunit B (canb1) mRNA_x0001_gb-BT073207.1- Oncorhynchus mykiss clone omyk-evn-507-223 Calcineurin subunit B isoform 1 putative mRNA complete cds	1.239	0.018254	PPP3R1
	TC152225	BT072110	Salmo salar clone ssal-rgf-512-019 Calcineurin subunit B isoform 1 putative mRNA partial cds	-1.896	0.001528	PPP3R1
	TC169552	AB162343	Oncorhynchus mykiss genes MHC class I b region complete cds	1.019	0.002504	PSMB8
	TC165021	HM210571	Oncorhynchus mykiss strain OSU-142 MHC class IA core region genomic sequence	-1.139	0.000293	PSMB8
	TC158037	HM210571	Oncorhynchus mykiss strain OSU-142 MHC class IA core region genomic sequence	-2.548	0.015259	PSMB8
	TC135099	not-annotated	not-annotated	1.494	0.047037	PTRH1
	TC150918	not-annotated	not-annotated	-1.219	0.034602	PTRH1
	TC137295	BT059585	Salmo salar clone ssal-rgf-516-299 Rho-related GTP-binding protein RhoE precursor putative mRNA complete cds	1.827	0.023417	RND3
	TC136218	BT059585	Salmo salar clone ssal-rgf-516-299 Rho-related GTP-binding protein RhoE precursor putative mRNA complete cds	1.458	0.00053	RND3
	TC138271	NM_001140259	Salmo salar Rho-related GTP-binding protein RhoE (rnd3) mRNA_x0001_gb-BT045538.1- Salmo salar clone ssal-rgf-524-163 Rho-related GTP-binding protein RhoE precursor putative mRNA complete cds	1.177	0.004558	RND3
	TC163930	BC165068	Danio rerio Rho family GTPase 2 mRNA (cDNA clone MGC:192243 IMAGE:100060552) complete cds	-1.486	0.007969	RND3
	TC144413	GU129140	Salmo salar IgH locus B genomic sequence	2.14	1e-06	RTL1
	TC137759	EU025709	Salmo salar chromatin modifying protein 2a (Chmp2a) male-specific lethal-1-like protein (Hampin) gastric inhibitory polypeptide (Gip) EAP30 subunit of ELL complex b (Eap30b) and nuclear domain 10 protein 52b (Ndp52b) genes complete cds; BAC05032 (BAC05032) pseudogene partial sequence; HoxB8bb (HoxB8bb) pseudogene complete sequence; homeobox protein HoxB6bb (HoxB6bb) and homeobox protein HoxB5bb (…	1.775	6.2e-05	RTL1
	TC143873	GU129140	Salmo salar IgH locus B genomic sequence	1.599	0.000288	RTL1
	TC170683	GU129140	Salmo salar IgH locus B genomic sequence	1.459	0.010842	RTL1
	TC158617	GU129139	Salmo salar IgH locus A genomic sequence	1.458	2e-05	RTL1
	TC156016	GU129139	Salmo salar IgH locus A genomic sequence	1.356	0.000656	RTL1
	TC154054	GU129140	Salmo salar IgH locus B genomic sequence	1.326	3.3e-05	RTL1
	TC158182	GU129139	Salmo salar IgH locus A genomic sequence	1.207	0.000376	RTL1
	TC152978	GU129140	Salmo salar IgH locus B genomic sequence	1.013	0.002011	RTL1
	TC158049	GU129140	Salmo salar IgH locus B genomic sequence	1.009	0.007401	RTL1
	TC171380	EU025709	Salmo salar chromatin modifying protein 2a (Chmp2a) male-specific lethal-1-like protein (Hampin) gastric inhibitory polypeptide (Gip) EAP30 subunit of ELL complex b (Eap30b) and nuclear domain 10 protein 52b (Ndp52b) genes complete cds; BAC05032 (BAC05032) pseudogene partial sequence; HoxB8bb (HoxB8bb) pseudogene complete sequence; homeobox protein HoxB6bb (HoxB6bb) and homeobox protein HoxB5bb (…	-1.043	0.001828	RTL1
	TC169209	GU129140	Salmo salar IgH locus B genomic sequence	-1.046	0.009806	RTL1
	TC166277	GU129139	Salmo salar IgH locus A genomic sequence	-1.071	0.005502	RTL1
	TC146018	GU552297	Salmo salar clone BAC 24B13 genomic sequence	-1.153	0.000118	RTL1
	TC166309	EU025709	Salmo salar chromatin modifying protein 2a (Chmp2a) male-specific lethal-1-like protein (Hampin) gastric inhibitory polypeptide (Gip) EAP30 subunit of ELL complex b (Eap30b) and nuclear domain 10 protein 52b (Ndp52b) genes complete cds; BAC05032 (BAC05032) pseudogene partial sequence; HoxB8bb (HoxB8bb) pseudogene complete sequence; homeobox protein HoxB6bb (HoxB6bb) and homeobox protein HoxB5bb (…	-1.179	0.003681	RTL1
	TC153514	GU129140	Salmo salar IgH locus B genomic sequence	-1.229	0.000264	RTL1
	TC153062	GU129139	Salmo salar IgH locus A genomic sequence	-1.238	0.001203	RTL1
	TC168664	GU129140	Salmo salar IgH locus B genomic sequence	-1.247	0.00123	RTL1
	TC159597	GU129139	Salmo salar IgH locus A genomic sequence	-1.275	0.004762	RTL1
	TC157259	EU025709	Salmo salar chromatin modifying protein 2a (Chmp2a) male-specific lethal-1-like protein (Hampin) gastric inhibitory polypeptide (Gip) EAP30 subunit of ELL complex b (Eap30b) and nuclear domain 10 protein 52b (Ndp52b) genes complete cds; BAC05032 (BAC05032) pseudogene partial sequence; HoxB8bb (HoxB8bb) pseudogene complete sequence; homeobox protein HoxB6bb (HoxB6bb) and homeobox protein HoxB5bb (…	-1.341	0.01723	RTL1
	TC140249	GU129140	Salmo salar IgH locus B genomic sequence	-1.452	0.000184	RTL1
	TC137475	EF210363	Salmo salar clone CH214-714P22 MHC Class I (Sasa-UBA) gene Sasa-UBA*0601 allele partial cds; and proteasome subunit beta type 8 (PSMB8a) proteasome subunit beta type 10 (PSMB10a) PSMB9a-like (PSMB9a-like) proteosome subunit beta type 9 (PSMB9) transporter 2 ATP binding cassette (TAP2a) bromodomain containing 2 (BRD2) collagen Type XI Alpha2 (COL11A2) retinoid X receptor beta (RXRB) solute carrier…	2.327	0.003932	SCAND3
	TC154179	DQ246664	Oncorhynchus mykiss SYPG1 (SYPG1) PHF1 (PHF1) and RGL2 (RGL2) genes complete cds; DNaseII pseudogene complete sequence; LGN-like PBX2 (PBX2) NOTCH-like TAP1 (TAP1) and BRD2 (BRD2) genes complete cds; and MHCII-alpha and Raftlin-like pseudogenes complete sequence	1.06	0.020075	SCAND3
	TC164681	EF210363	Salmo salar clone CH214-714P22 MHC Class I (Sasa-UBA) gene Sasa-UBA*0601 allele partial cds; and proteasome subunit beta type 8 (PSMB8a) proteasome subunit beta type 10 (PSMB10a) PSMB9a-like (PSMB9a-like) proteosome subunit beta type 9 (PSMB9) transporter 2 ATP binding cassette (TAP2a) bromodomain containing 2 (BRD2) collagen Type XI Alpha2 (COL11A2) retinoid X receptor beta (RXRB) solute carrier…	-1.394	0.033323	SCAND3
	TC148314	DQ246664	Oncorhynchus mykiss SYPG1 (SYPG1) PHF1 (PHF1) and RGL2 (RGL2) genes complete cds; DNaseII pseudogene complete sequence; LGN-like PBX2 (PBX2) NOTCH-like TAP1 (TAP1) and BRD2 (BRD2) genes complete cds; and MHCII-alpha and Raftlin-like pseudogenes complete sequence	-1.759	0.000233	SCAND3
	TC145509	EU621899	Salmo salar clone 63I10 growth hormone 2 gene complete cds; and skeletal muscle sodium channel alpha subunit-like myosin alkali light chain-like and microtubule-associated protein Tau-like genes complete sequence	1.813	0.000166	SCN4A
	TC170231	EU621898	Salmo salar clone 11F04_73D15 interferon alpha 1-like gene complete sequence; growth hormone 1 gene complete cds; and skeletal muscle sodium channel alpha subunit-like myosin alkali light chain-like and microtubule-associated protein Tau-like genes complete sequence	1.58	9.6e-05	SCN4A
	TC158508	EU621898	Salmo salar clone 11F04_73D15 interferon alpha 1-like gene complete sequence; growth hormone 1 gene complete cds; and skeletal muscle sodium channel alpha subunit-like myosin alkali light chain-like and microtubule-associated protein Tau-like genes complete sequence	1.388	0.000215	SCN4A
	TC166170	EU621899	Salmo salar clone 63I10 growth hormone 2 gene complete cds; and skeletal muscle sodium channel alpha subunit-like myosin alkali light chain-like and microtubule-associated protein Tau-like genes complete sequence	1.204	0.00055	SCN4A
	TC150350	EU621901	Oncorhynchus tshawytscha clone ChinookGH2 growth hormone 2 gene complete cds; and skeletal muscle sodium channel alpha subunit-like myosin alkali light chain-like and microtubule-associated protein Tau-like genes complete sequence	-1.035	0.000551	SCN4A
	TC154499	EU621899	Salmo salar clone 63I10 growth hormone 2 gene complete cds; and skeletal muscle sodium channel alpha subunit-like myosin alkali light chain-like and microtubule-associated protein Tau-like genes complete sequence	-1.293	0.000186	SCN4A
	TC158613	EU621901	Oncorhynchus tshawytscha clone ChinookGH2 growth hormone 2 gene complete cds; and skeletal muscle sodium channel alpha subunit-like myosin alkali light chain-like and microtubule-associated protein Tau-like genes complete sequence	-1.346	0.001167	SCN4A
	TC167123	EU621901	Oncorhynchus tshawytscha clone ChinookGH2 growth hormone 2 gene complete cds; and skeletal muscle sodium channel alpha subunit-like myosin alkali light chain-like and microtubule-associated protein Tau-like genes complete sequence	-1.47	0.001371	SCN4A
	TC144545	EU621899	Salmo salar clone 63I10 growth hormone 2 gene complete cds; and skeletal muscle sodium channel alpha subunit-like myosin alkali light chain-like and microtubule-associated protein Tau-like genes complete sequence	-1.749	0.026363	SCN4A
	TC154720	NM_053962	Rattus norvegicus serine dehydratase (Sds) mRNA_x0001_gb-BC088110.1- Rattus norvegicus serine dehydratase mRNA (cDNA clone MGC:108581 IMAGE:7323391) complete cds	1.137	0.000367	SDS
	TC156392	BT059861	Salmo salar clone ssal-rgg-506-208 C-C motif chemokine 19 precursor putative mRNA complete cds	-2.846	0.000306	SDS
	TC144172	BT028065	Gasterosteus aculeatus clone CNB118-A06 mRNA sequence	1.966	9e-06	SLC26A5
	TC143580	not-annotated	not-annotated	-1.479	0.007497	SLC26A5
	TC153826	NM_001195172	Oncorhynchus mykiss suppressor of cytokine signaling 7 (socs7) mRNA_x0001_emb-AM903343.1- Oncorhynchus mykiss mRNA for suppressor of cytokine signaling 7 (socs7 gene)	1.268	0.014387	SOCS7
	TC134417	NM_001195172	Oncorhynchus mykiss suppressor of cytokine signaling 7 (socs7) mRNA_x0001_emb-AM903343.1- Oncorhynchus mykiss mRNA for suppressor of cytokine signaling 7 (socs7 gene)	-4.13	0.026217	SOCS7
	TC136643	NM_001124401	Oncorhynchus mykiss alpha23-sialyltransferase (st3gal-i) mRNA_x0001_emb-AJ585760.1- Oncorhynchus mykiss mRNA for alpha23-sialyltransferase (st3Gal-I gene)	1.683	0.038506	ST3GAL1
	TC134164	NM_001124401	Oncorhynchus mykiss alpha23-sialyltransferase (st3gal-i) mRNA_x0001_emb-AJ585760.1- Oncorhynchus mykiss mRNA for alpha23-sialyltransferase (st3Gal-I gene)	-1.13	0.000415	ST3GAL1
	TC132634	NM_001124401	Oncorhynchus mykiss alpha23-sialyltransferase (st3gal-i) mRNA_x0001_emb-AJ585760.1- Oncorhynchus mykiss mRNA for alpha23-sialyltransferase (st3Gal-I gene)	-1.263	0.000116	ST3GAL1
	TC143007	NM_001140674	Salmo salar Cytosolic sulfotransferase 2 (st2s2) mRNA_x0001_gb-BT046564.1- Salmo salar clone ssal-plnb-506-065 Cytosolic sulfotransferase 2 putative mRNA complete cds	1.098	0.000208	SULT1C4
	TC156673	not-annotated	not-annotated	-1.781	9.7e-05	SULT1C4
	TC152087	NM_001200899	Ictalurus punctatus sulfotransferase family cytosolic 2b member 1 (st2b1) mRNA_x0001_gb-GU589223.1- Ictalurus punctatus clone CBZB11065 sulfotransferase family cytosolic 2b member 1 (ST2B1) mRNA complete cds	2.448	6.1e-05	SULT2B1
	TC162107	not-annotated	not-annotated	-1.35	0.000855	SULT2B1
	TC134375	AY305661	Oncorhynchus mykiss RH2 opsin gene promoter region 5' UTR and partial cds	-1.71	1.3e-05	SULT2B1
	IMM 417	NM_001140256	Salmo salar TGF-beta receptor type-2 (tgfr2) mRNA_x0001_gb-BT045532.1- Salmo salar clone ssal-rgf-524-132 TGF-beta receptor type-2 precursor putative mRNA complete cds	1.826	0.020059	TGFBR2
	TC169410	NM_001140256	Salmo salar TGF-beta receptor type-2 (tgfr2) mRNA_x0001_gb-BT045532.1- Salmo salar clone ssal-rgf-524-132 TGF-beta receptor type-2 precursor putative mRNA complete cds	-3.034	0.00987	TGFBR2
	TC151083	EU816603	Salmo salar clone BAC S0142M23 complete sequence	1.282	0.000121	TIMM44
	TC170959	EU816603	Salmo salar clone BAC S0142M23 complete sequence	-1.011	0.010412	TIMM44
	TC163905	EU816603	Salmo salar clone BAC S0142M23 complete sequence	-1.066	0.002723	TIMM44
	TC152686	EU816603	Salmo salar clone BAC S0142M23 complete sequence	-1.666	0.04848	TIMM44
	TC163412	HM208332	Oncorhynchus mykiss clone BAC20-C13 zinc transporter (SLC39A7.B) gene MHC class I antigen (Onmy-UGA) gene Onmy-UGA-OSU allele RING1.B ribosomal protein S18 (RPS18.B) vacuolar protein sorting-associated protein 52-like protein (VPS52.b) putative adhesion protein (VIG-B319.b) hyopthetical protein and cyclic AMP-dependent transcription factor ATF-6 alpha-like protein (ATF6) genes complete cds; and T…	2.698	0	TNXB
	TC159311	GQ505858	Salmo salar clone BAC CHORI214-129P21 genomic sequence	1.404	0.000117	TNXB
	TC167242	HM208332	Oncorhynchus mykiss clone BAC20-C13 zinc transporter (SLC39A7.B) gene MHC class I antigen (Onmy-UGA) gene Onmy-UGA-OSU allele RING1.B ribosomal protein S18 (RPS18.B) vacuolar protein sorting-associated protein 52-like protein (VPS52.b) putative adhesion protein (VIG-B319.b) hyopthetical protein and cyclic AMP-dependent transcription factor ATF-6 alpha-like protein (ATF6) genes complete cds; and T…	1.092	0.031708	TNXB
	TC148467	GQ505859	Salmo salar clone BAC CHORI214-439H13 genomic sequence	-1.065	0.034228	TNXB
	TC157012	HM208332	Oncorhynchus mykiss clone BAC20-C13 zinc transporter (SLC39A7.B) gene MHC class I antigen (Onmy-UGA) gene Onmy-UGA-OSU allele RING1.B ribosomal protein S18 (RPS18.B) vacuolar protein sorting-associated protein 52-like protein (VPS52.b) putative adhesion protein (VIG-B319.b) hyopthetical protein and cyclic AMP-dependent transcription factor ATF-6 alpha-like protein (ATF6) genes complete cds; and T…	-1.201	0.000529	TNXB
	TC160036	GQ505858	Salmo salar clone BAC CHORI214-129P21 genomic sequence	-1.367	0.001071	TNXB
	TC157082	BT045316	Salmo salar clone ssal-rgf-518-106 Tropomyosin-1 alpha chain putative mRNA complete cds	1.144	0.049937	TPM1
	TC150080	BT058926	Salmo salar clone ssal-rgf-514-002 Tropomyosin alpha-3 chain putative mRNA complete cds	-1.046	0.001499	TPM1
	TC148159	BT058926	Salmo salar clone ssal-rgf-514-002 Tropomyosin alpha-3 chain putative mRNA complete cds	-1.166	0.00131	TPM1
	TC161649	EF427381	Salmo salar clone BAC CHORI214-30C23 complete sequence	1.511	7.1e-05	TUBB
	TC159378	EF427381	Salmo salar clone BAC CHORI214-30C23 complete sequence	-1.412	0.000152	TUBB
	TC147321	EU008541	Salmo salar neurogranin TIP41-like protein (TIP41) MHC class II antigen beta chain (Sasa-DBB) MHC class II antigen alpha chain (Sasa-DBA) leucine rich repeat containing 35-like protein and alpha-tectorin-like protein genes complete cds	2.114	0.025789	ZBED5
	TC157357	GU817336	Salmo salar clone BAC CHORI214-109F19 complete sequence	1.35	0.000436	ZBED5
	TC155579	EU008541	Salmo salar neurogranin TIP41-like protein (TIP41) MHC class II antigen beta chain (Sasa-DBB) MHC class II antigen alpha chain (Sasa-DBA) leucine rich repeat containing 35-like protein and alpha-tectorin-like protein genes complete cds	-1.179	0.003706	ZBED5
	TC171661	HM159472	Salmo salar clone BAC 261D01 Foxl2-like protein (Foxl2) gene complete cds	-1.206	0.005666	ZBED5
	TC144500	GU817336	Salmo salar clone BAC CHORI214-109F19 complete sequence	-1.331	0.023507	ZBED5
	TC159903	EF467298	Salmo salar clone 39N03 TCR-alpha/delta locus genomic sequence	-1.666	0.000241	ZBED5
	TC157152	EU008541	Salmo salar neurogranin TIP41-like protein (TIP41) MHC class II antigen beta chain (Sasa-DBB) MHC class II antigen alpha chain (Sasa-DBA) leucine rich repeat containing 35-like protein and alpha-tectorin-like protein genes complete cds	-2.901	0.006728	ZBED5
	TC146070	GQ505860	Salmo salar clone BAC CHORI214-68O19 genomic sequence	2.152	0.037663	ZHX1
	TC142521	GQ505860	Salmo salar clone BAC CHORI214-68O19 genomic sequence	-1.193	4.9e-05	ZHX1
	RNA targets with no HGNC gene identifier (excluded from functional analysis of gene expression)
	CUST_33_PI425348775	IL-2Rbeta2	0	1.076	0.004505
	CUST_47_PI420312184	not-annotated	not-annotated	2.499	1e-06
	CUST_57_PI420312184	not-annotated	not-annotated	2.195	1.3e-05
	CUST_67_PI420312184	not-annotated	not-annotated	2.011	2e-06
	IMM 3	NM_001124472	Oncorhynchus mykiss 14-3-3E1 protein (LOC100136196) mRNA_x0001_gb-AY370883.1- Oncorhynchus mykiss 14-3-3E1 protein mRNA complete cds	1.034	0.000504
	IMM 3	NM_001124472	Oncorhynchus mykiss 14-3-3E1 protein (LOC100136196) mRNA_x0001_gb-AY370883.1- Oncorhynchus mykiss 14-3-3E1 protein mRNA complete cds	1.187	0.000108
	IMM 574	NM_001124601		1.579	0.000344
	IMM 574	NM_001124601		1.243	0.00302
	IMM 574	NM_001124601		1.263	0.002828
	IMM 640	GU817335	Salmo salar clone BAC CHORI214-083H23 complete sequence	1.094	0.020652
	IMM 640	GU817335	Salmo salar clone BAC CHORI214-083H23 complete sequence	1.57	0.001132
	IMM 658	GQ925600	Salmo salar conserved noncoding element 1011 and conserved noncoding element 1000 genomic sequences	1.013	0.005828
	IMM 832	NM_001124601	Oncorhynchus mykiss differentially regulated trout protein 1 (LOC100136615) mRNA_x0001_gb-AF281355.1- Oncorhynchus mykiss differentially regulated trout protein 1 mRNA complete cds	1.089	0.01892
	IMM 832	NM_001124601	Oncorhynchus mykiss differentially regulated trout protein 1 (LOC100136615) mRNA_x0001_gb-AF281355.1- Oncorhynchus mykiss differentially regulated trout protein 1 mRNA complete cds	1.497	0.000565
	IMM 832	NM_001124601	Oncorhynchus mykiss differentially regulated trout protein 1 (LOC100136615) mRNA_x0001_gb-AF281355.1- Oncorhynchus mykiss differentially regulated trout protein 1 mRNA complete cds	1.685	0.000165
	IMM 852	NM_001124317	Oncorhynchus mykiss CC chemokine with stalk CK2 (LOC100135979) mRNA_x0001_gb-AF418561.1- Oncorhynchus mykiss CC chemokine with stalk CK2 mRNA complete cds	1.035	0.01263
	TC132601	not-annotated	not-annotated	1.519	9.5e-05
	TC132737	not-annotated	not-annotated	2.933	0
	TC132944	not-annotated	not-annotated	1.547	0.00123
	TC133086	not-annotated	not-annotated	1.075	0.023372
	TC133338	not-annotated	not-annotated	1.062	0.003413
	TC133624	not-annotated	not-annotated	1.169	0.00649
	TC133645	not-annotated	not-annotated	1.203	0.000516
	TC133781	not-annotated	not-annotated	1.526	0.006186
	TC133922	not-annotated	not-annotated	1.013	0.001639
	TC134414	not-annotated	not-annotated	1.753	0.011067
	TC134447	not-annotated	not-annotated	1.978	1.1e-05
	TC134669	not-annotated	not-annotated	1.335	0.002781
	TC134685	not-annotated	not-annotated	1.122	0.000118
	TC134699	not-annotated	not-annotated	3.756	0
	TC135019	not-annotated	not-annotated	1.423	2.5e-05
	TC135138	BT125516	Salmo salar clone ssal-evf-514-051 Natterin-like protein putative mRNA complete cds	1.547	0.000312
	TC135322	not-annotated	not-annotated	3.245	0.007121
	TC135400	not-annotated	not-annotated	1.251	0.029551
	TC135650	not-annotated	not-annotated	1.204	0.031859
	TC136241	not-annotated	not-annotated	1.886	6e-06
	TC136523	DQ218473	Oncorhynchus mykiss TNF-New isoform 2 mRNA partial cds	2.03	3.5e-05
	TC136532	not-annotated	not-annotated	2.937	1e-06
	TC136585	not-annotated	not-annotated	2.699	0
	TC137021	not-annotated	not-annotated	1.098	0.000179
	TC137198	not-annotated	not-annotated	1.841	8.4e-05
	TC137364	not-annotated	not-annotated	1.225	0.000123
	TC137367	not-annotated	not-annotated	1.179	0.03241
	TC137518	not-annotated	not-annotated	2.025	3e-06
	TC137703	not-annotated	not-annotated	1.367	0.000775
	TC137731	not-annotated	not-annotated	1.48	1.1e-05
	TC137873	not-annotated	not-annotated	1.016	0.00856
	TC138032	not-annotated	not-annotated	1.768	0.000389
	TC138216	not-annotated	not-annotated	1.289	0.000185
	TC138259	not-annotated	not-annotated	1.093	0.010183
	TC138785	not-annotated	not-annotated	1.66	9e-06
	TC138872	not-annotated	not-annotated	2.207	4.2e-05
	TC138948	EF427378	Salmo salar clone BAC CH15L20 complete sequence	1.946	6.9e-05
	TC139290	not-annotated	not-annotated	2.541	0
	TC139333	not-annotated	not-annotated	2.364	0.000178
	TC139355	not-annotated	not-annotated	1.447	7e-05
[truncated: 455 more rows]
