# Supplementary material for: Gill Transcriptomic Responses to Toxin-producing Alga Prymnesium parvum in Rainbow Trout
Source: Front Immunol. 2021 Dec 8;12:794593. doi: 10.3389/fimmu.2021.794593 (PMC8693183; doi:10.3389/fimmu.2021.794593)
Supplement: Supplementary file 10 [file Table_5.xlsx]

## Sheet: Suppl Table 5
	Supplementary Table 5. Details of 34 canonical pathways that were significantly altered (Benjamini-Hochberg multiple testing correction p-value < 0.001) in the gills of rainbow
	trout from HH vs control groups (HH, high exposure/high response), as identified by Ingenuity Pathway Analysis (IPA). The analysis was performed on 1423 analysis-ready
	genes (for details see Supplementary Table 1). The gene ratio is calculated as the number of genes in each pathway that are present in our experimental dataset (column G), divided
	by the total number of genes that constitute the pathway and that are in the reference set (Ingenuity Knowledge Base). The overall activation/inhibition states of canonical pathways
	are predicted based on a z-score algorithm; z-score ≥ 2 predicts an increase in the pathway activity (in red) while z-score ≤ −2 predicts a decrease in the pathway activity (in green).
	No information on the pathway activity is denoted by a hyphen (-).
	Canonical pathway	-Log (B-H p-value)	B-H p-value	Gene ratio	z-score	Contributing genes
	Acute Phase Response Signaling	7.28	5.24807e-08	0.206	1.732	AMBP,APOA2,C4BPA,CEBPB,CFB,CP,ELP1,FGG,FOS,HAMP,HMOX1,HNRNPK,HPX,HRAS,IL1B,IL6R,JUN,LBP,MAPK13,MBL2,MTOR,NFKBIA,PDPK1,RAP2B,RASD1,RBP1,RBP2,SAA2,SERPINA1,SERPINE1,SOCS1,SOCS2,SOCS3,SOCS7,SOS1,TF,TRAF6
	Glucocorticoid Receptor Signaling	6.81	1.54882e-07	0.141	-	ANXA1,ARG2,ATP5F1A,BRD7,CDKN1C,CREBBP,CSF2RB,CXCL8,CXCR1,CXCR2,ELP1,FGG,FOS,GJA1,GTF2B,GTF2H2,HRAS,HSP90AA1,HSP90AB1,HSPA1A/HSPA1B,HSPA4,HSPA9,IGF1,IL10,IL10RB,IL12RB1,IL15RA,IL1B,IL1R2,IL20RA,IL21R,IL2RG,IL4,IL6R,JUN,KRT14,KRT15,KRT16,KRT8,MAPK13,MMP13,MMP3,MMP9,MYC,NCOR1,NFKBIA,NOS2,PC,PIK3R5,PLA2G12A,POLR2A,PPP3R1,PTGS2,RAP2B,RASD1,SERPINE1,SGK1,SMAD3,SOS1,SRA1,TAF5,TBP,TRAF6,TSC22D3,UQCRFS1
	HIF1α Signaling	6.65	2.23872e-07	0.185	1.947	ADM,APEX1,CREBBP,EGLN3,FOXP3,HIF1A,HK1,HMOX1,HRAS,HSP90AA1,HSPA1A/HSPA1B,HSPA4,HSPA9,IGF1,IL6R,JUN,MET,MMP13,MMP19,MMP3,MMP9,MTOR,NOS2,PIK3R5,PKM,PPP3R1,PRKCH,PRKD3,RACK1,RAP2B,RASD1,SAT1,SERPINE1,SLC2A1,SLC2A4,STUB1,TF,VEGFA
	Tumor Microenvironment Pathway	5.36	4.36516e-06	0.182	4.95	CCND1,CD274,CSF3,CTLA4,CXCL12,CXCL8,CXCR4,FOS,HIF1A,HLA-C,HRAS,IGF1,IL10,IL1B,IL4,IL6R,JUN,LEPR,MMP13,MMP19,MMP3,MMP9,MYC,NOS2,PIK3R5,PTGS2,RAP2B,RASD1,SLC2A1,SLC2A4,TNC,VEGFA
	IL-6 Signaling	5.31	4.89779e-06	0.206	3.128	CEBPB,CXCL8,ELP1,FOS,HRAS,IL1B,IL1R2,IL1RAPL1,IL1RAPL2,IL6R,JUN,LBP,MAP4K4,MAPK13,MCL1,NFKBIA,PIK3R5,RAP2B,RASD1,SOCS1,SOCS3,SOS1,SRF,TNFAIP6,TRAF6,VEGFA
	Role of Tissue Factor in Cancer	4.89	1.28825e-05	0.207	-	CASP3,CCN1,CCN2,CFL2,CXCL8,F2RL1,F3,FGG,FRK,GNA13,HRAS,IL1B,ITGA6,ITGB1,LCK,MAPK13,MMP13,MTOR,PDXP,PIK3R5,PTK2B,RAP2B,RASD1,VEGFA
	NRF2-mediated Oxidative Stress Response	4.82	1.51356e-05	0.169	1.964	ABCC4,ACTA1,ACTC1,CAT,CDC34,CREBBP,DNAJA4,DNAJB14,DNAJB5,DNAJC17,FOS,FTH1,GPX2,GSTP1,HERPUD1,HMOX1,HRAS,HSPB8,JUN,JUNB,JUND,MAFF,MAFK,MGST1,PIK3R5,PRKCH,PRKD3,RAP2B,RASD1,STIP1,TXNRD1,VCP
	HER-2 Signaling in Breast Cancer	4.68	2.0893e-05	0.165	0.354	ARF1,CASP3,CASP9,CCND1,CCNE2,CDKN1B,COX6B1,COX7C,COX8A,ELF2,ETS1,ETS2,FOS,FRK,GNB1L,HRAS,ITGB1,JUN,LCK,MTOR,MYC,NFKBIA,NRG1,PIK3R5,PRKCH,PRKD3,PTGS2,RAP2B,RASD1,RBL2,SMAD3,SOS1
	PI3K/AKT Signaling	4.68	2.0893e-05	0.168	2.5	CCND1,CDKN1B,CSF2RB,CXCR1,CXCR2,ELP1,HRAS,HSP90AA1,HSP90AB1,IL10RB,IL12RB1,IL15RA,IL1R2,IL20RA,IL21R,IL2RG,IL6R,ITGA6,ITGB1,MCL1,MTOR,NFKBIA,PDPK1,PPP2CA,PTGS2,RAP2B,RASD1,SOS1,YWHAB,YWHAG,YWHAZ
	PPAR Signaling	4.68	2.0893e-05	0.21	-3.13	CITED2,CREBBP,ELP1,FOS,HRAS,HSP90AA1,HSP90AB1,IL1B,IL1R2,IL1RAPL1,IL1RAPL2,JUN,MAP4K4,NCOR1,NFKBIA,PPARD,PTGS2,RAP2B,RASD1,SOS1,SRA1,TRAF6
	Prostate Cancer Signaling	4.54	2.88403e-05	0.22	-	ABL1,CASP9,CCND1,CCNE2,CDKN1B,CREBBP,GSTP1,HRAS,HSP90AA1,HSP90AB1,MTOR,NFKBIA,NKX3-1,PA2G4,PDPK1,PIK3R5,RAP2B,RASD1,SIN3A,SOS1
	IL-10 Signaling	4.52	3.01995e-05	0.243	-	ARG2,ELP1,FOS,HMOX1,IL10,IL10RB,IL1B,IL1R2,IL1RAPL1,IL1RAPL2,JUN,LBP,MAP4K4,MAPK13,NFKBIA,SOCS3,TRAF6
	Huntington's Disease Signaling	4.52	3.01995e-05	0.151	0	ATP5F1A,BDNF,BET1L,CAPN10,CASP10,CASP3,CASP8,CASP9,CREBBP,CYCS,GNB1L,GNB2,HDAC3,HRAS,HSPA1A/HSPA1B,HSPA4,HSPA9,IGF1,JUN,MTOR,NAPG,NCOR1,NSF,PDPK1,PENK,PIK3R5,POLR2A,PRKCH,PRKD3,SGK1,SH3GL3,SIN3A,SNAP25,SOS1,TBP,TGM2
	Role of PKR in Interferon Induction and Antiviral Response	4.52	3.01995e-05	0.195	-0.218	ATF3,CASP3,CASP8,CASP9,COLEC12,CYCS,ELP1,FOS,HSP90AA1,HSP90AB1,HSPA1A/HSPA1B,HSPA4,HSPA9,IL1B,IRF1,JUN,MAPK13,NFKBIA,NPM1,PRKRA,TLR3,TRAF3,TRAF6
	Role of Macrophages, Fibroblasts and Endothelial Cells in Rheumatoid Arthritis	4.52	3.01995e-05	0.137	-	CCND1,CEBPB,CEBPD,CREBBP,CXCL12,CXCL8,DAAM1,ELP1,F2RL1,FOS,FZD8,HRAS,IL10,IL16,IL1B,IL1R2,IL1RAPL1,IL1RAPL2,IL6R,JUN,LTB,MMP13,MMP3,MYC,NFKBIA,NOS2,PIK3R5,PPP3R1,PRKCH,PRKD3,RAP2B,RASD1,SMO,SOCS1,SOCS3,TLR3,TLR5,TRAF1,TRAF3,TRAF5,TRAF6,VEGFA,WNT11
	STAT3 Pathway	4.52	3.01995e-05	0.185	1	CISH,CSF2RB,CXCR1,CXCR2,FGFR2,HRAS,IGF1,IL10RB,IL12RB1,IL15RA,IL1B,IL1R2,IL20RA,IL21R,IL2RG,IL6R,MAPK13,MYC,RAP2B,RASD1,SOCS1,SOCS2,SOCS3,SOCS7,VEGFA
	Hepatic Fibrosis Signaling Pathway	4.52	3.01995e-05	0.13	3.355	ACVR1B,CASP3,CCN2,CCND1,CD40,CDKN1B,CEBPB,CREBBP,CXCL8,DVL2,FOS,FTH1,FZD8,GLI2,HIF1A,HRAS,IL1B,IL1R2,IL1RAPL1,IL1RAPL2,ITGA6,ITGB1,JUN,LEPR,MAPK13,MMP13,MTOR,MYC,MYL6,MYLK,NFKBIA,PIK3R5,PRKCH,PRKD3,RAC2,RAP2B,RASD1,RHOB,RHOF,SERPINE1,SHH,SMAD3,SMO,SNAI1,SOS1,TF,TRAF6,VEGFA,WNT11
	LXR/RXR Activation	4.4	3.98107e-05	0.19	-0.943	AMBP,APOA2,APOA4,ARG2,CCL7,FASN,HMGCR,HPX,IL1B,IL1R2,IL1RAPL1,IL1RAPL2,LBP,LPL,MMP9,NCOR1,NOS2,PTGS2,SAA2,SERPINA1,SREBF1,TF,TLR3
	IGF-1 Signaling	4.4	3.98107e-05	0.202	1.069	CASP9,CCN1,CCN2,FOS,HRAS,IGF1,IGFBP6,JUN,PDPK1,PIK3R5,RAP2B,RASD1,SOCS1,SOCS2,SOCS3,SOCS7,SOS1,SRF,YWHAB,YWHAG,YWHAZ
	Prolactin Signaling	4.3	5.01187e-05	0.222	0.775	CEBPB,CREBBP,FOS,HRAS,IRF1,JUN,MYC,PDPK1,PIK3R5,PRKCH,PRKD3,RAP2B,RASD1,SOCS1,SOCS2,SOCS3,SOCS7,SOS1
	MSP-RON Signaling In Cancer Cells Pathway	4.2	6.30957e-05	0.179	3.266	CCND1,CREBBP,CSF2RB,ELF2,ETS1,ETS2,FOS,HIF1A,HRAS,ITGA6,ITGB1,JUN,MET,MTOR,MYC,NFKBIA,PIK3R5,PTK2B,RAP2B,RASD1,VEGFA,YWHAB,YWHAG,YWHAZ
	Systemic Lupus Erythematosus In B Cell Signaling Pathway	4.1	7.94328e-05	0.138	1.298	CCND1,CCND2,CD22,CD40,CXCL8,FOS,HRAS,IL10,IL11,IL12B,IL1B,IL4,IL6R,JUN,LCK,LTB,MAP4K4,MCL1,MTOR,MYC,PDPK1,PIK3AP1,PIK3R5,PPP3R1,PRKCH,PRKD3,RAC2,RAP2B,RASD1,SOS1,SYK,TLR3,TNFSF10,TRAF1,TRAF3,TRAF5,TRAF6,VAV1
	Small Cell Lung Cancer Signaling	3.87	0.000134896	0.225	0	ABL1,CASP9,CCND1,CCNE2,CDKN1B,CYCS,MYC,NFKBIA,PA2G4,PIK3R5,PTGS2,SIN3A,TRAF1,TRAF3,TRAF5,TRAF6
	Neuregulin Signaling	3.84	0.000144544	0.19	0.535	CDKN1B,CRK,DCN,ERRFI1,HRAS,HSP90AA1,HSP90AB1,ITGA6,ITGB1,MTOR,MYC,NRG1,NRG4,PDPK1,PRKCH,PRKD3,RAP2B,RASD1,RNF41,SOS1
	IL-8 Signaling	3.84	0.000144544	0.15	2.746	ANGPT2,CCND1,CCND2,CSTB,CXCL8,CXCR1,CXCR2,ELP1,FOS,GNA13,GNB1L,GNB2,HMOX1,HRAS,JUN,MAP4K4,MMP9,MTOR,PIK3R5,PRKCH,PRKD3,PTGS2,PTK2B,RAC2,RAP2B,RASD1,RHOB,RHOF,TRAF6,VEGFA
	Senescence Pathway	3.78	0.000165959	0.135	3.43	ACVR1B,ANAPC5,ANAPC7,ATF3,CAPN10,CAT,CCNB1,CCND1,CDC16,CDKN1B,CEBPB,CREBBP,CXCL8,ELF2,ETS1,ETS2,GADD45A,GADD45B,HRAS,JUN,MAPK6,MTOR,NBN,PCGF6,PDHA1,PIK3R5,PML,PPP2CA,PPP3R1,RAP2B,RASD1,RBL2,SAA2,SERPINE1,SMAD3,TRAF6,ZFP36L1
	IL-17 Signaling	3.56	0.000275423	0.15	3.402	CEBPB,CSF3,CXCL8,FOS,HRAS,HSP90AA1,HSP90AB1,IL11,IL12B,IL1B,IL4,JUN,LTB,MAPK13,MMP13,MMP3,MMP9,MUC5B,NOS2,PIK3R5,PTGS2,RAP2B,RASD1,RGS16,TNFSF10,TRAF5,TRAF6,VEGFA
	Lymphotoxin β Receptor Signaling	3.51	0.00030903	0.245	1.732	CASP3,CASP9,CREBBP,CYCS,ELP1,LTB,NFKBIA,PDPK1,PIK3R5,TRAF1,TRAF3,TRAF5,TRAF6
	Adipogenesis pathway	3.3	0.000501187	0.164	-	ATG7,BMP4,CEBPB,CEBPD,CTBP1,FBXW7,FGFR2,FZD8,GTF2H2,HDAC3,HIF1A,LPL,NOCT,RBP1,SIN3A,SLC2A4,SMAD3,SMO,SOX9,SREBF1,TBL1XR1,TXNIP
	Hepatic Fibrosis / Hepatic Stellate Cell Activation	3.21	0.000616595	0.145	-	CCN2,CD40,COL11A1,COL12A1,COL28A1,COL4A5,CXCL8,FGFR2,IGF1,IL10,IL1B,IL1R2,IL1RAPL1,IL1RAPL2,IL4,IL6R,KLF6,LBP,LEPR,MET,MMP13,MMP9,MYL6,SERPINE1,SMAD3,TIMP2,VEGFA
	Protein Ubiquitination Pathway	3.16	0.000691831	0.128	-	AMFR,ANAPC5,CDC34,CRYAB,DNAJB14,DNAJB5,DNAJC17,FBXW7,HLA-C,HSCB,HSP90AA1,HSP90AB1,HSPA13,HSPA1A/HSPA1B,HSPA4,HSPA4L,HSPA9,HSPB8,HSPD1,PSMB4,PSMB8,PSMB9,SMO,STUB1,SUGT1,TAP1,TAP2,TRAF6,UBA1,UBE2B,UBE3A,UCHL5,USP18,USP2,USP4
	ILK Signaling	3.07	0.000851138	0.142	2.711	ACTA1,ACTC1,ACTN4,CASP3,CCND1,CFL2,CREBBP,FBLIM1,FOS,HIF1A,ITGB1,JUN,MMP9,MTOR,MYC,MYL6,NACA,NOS2,PDPK1,PIK3R5,PPP2CA,PTGS2,RAC2,RHOB,RHOF,SNAI1,VEGFA
	PPARα/RXRα Activation	3.05	0.000891251	0.141	-3.128	ACADL,ACOX1,ACVR1B,APOA2,BCL3,CREBBP,ELP1,FASN,GK,HRAS,HSP90AA1,HSP90AB1,IL1B,IL1R2,IL1RAPL1,IL1RAPL2,JUN,LPL,MAP4K4,MED24,NCOR1,NFKBIA,RAP2B,RASD1,SMAD3,SOS1,TRAF6
	Coronavirus Pathogenesis Pathway	3.05	0.000891251	0.153	1.789	ABL1,CASP3,CASP8,CASP9,CCND1,CXCL8,EEF1A1,FAU,FOS,IL1B,JUN,MAPK13,NFKBIA,NPM1,PA2G4,PTGS2,RBL2,RPS17,SERPINE1,SIN3A,SMAD3,TRAF3,TRIM25
		.
