# Supplementary material for: Gill Transcriptomic Responses to Toxin-producing Alga Prymnesium parvum in Rainbow Trout
Source: Front Immunol. 2021 Dec 8;12:794593. doi: 10.3389/fimmu.2021.794593 (PMC8693183; doi:10.3389/fimmu.2021.794593)
Supplement: Supplementary file 13 [file Table_8.xlsx]

## Sheet: Suppl Table 8
	Supplementary Table 8. Common and unique canonical pathways that were significantly altered in the gills of rainbow trout from HH vs control, HM vs control
	and LL vs control groups, as presented in Figure 3A (HH, HM and LL refer to the high exposure/high response, high exposure/moderate response, and low exposure/low
	response fish, respectively). Pathways were considered significantly altered at Benjamini-Hochberg multiple testing correction p-value < 0.001 (for details
	see Supplementary Tables 5-7). The gene ratio is calculated as the number of genes in each pathway that are present in our experimental dataset, divided by the total
	number of genes that constitute the pathway and that are in the reference set (Ingenuity Knowledge Base). The overall activation/inhibition states of the pathways
	are predicted based on a z-score algorithm; z-score ≥ 2 predicts an increase in the pathway activity (in red) while z-score ≤ −2 predicts a decrease in the pathway
	activity (in green). No information on the pathway activity is marked as NA. Pathways that are absent from comparison are denoted by a hyphen (-).
	Canonical pathway	-Log (B-H p-value)				Gene ratio				z-score
		HH vs control	HM vs control	LL vs control		HH vs control	HM vs control	LL vs control		HH vs control	HM vs control	LL vs control
	18 common pathways for HH vs control x HM vs control x LL vs control
	Acute Phase Response Signaling	7.28	9.45	5.98		0.206	0.189	0.111		1.732	1	2.668
	Glucocorticoid Receptor Signaling	6.81	9.51	7.4		0.141	0.13	0.0801		NA	NA	NA
	HIF1α Signaling	6.65	6.37	5.79		0.185	0.151	0.102		1.947	0.898	1.528
	Tumor Microenvironment Pathway	5.36	9.17	6.1		0.182	0.188	0.114		4.95	4.004	3.578
	IL-6 Signaling	5.31	6.16	6.1		0.206	0.183	0.135		3.128	2.132	3.638
	Role of Tissue Factor in Cancer	4.89	9.45	5.94		0.207	0.233	0.138		NA	NA	NA
	PI3K/AKT Signaling	4.68	6.37	3.1		0.168	0.158	0.0815		2.5	1.606	3.162
	PPAR Signaling	4.68	4.6	5.78		0.21	0.171	0.143		-3.13	-3.153	-3.873
	Hepatic Fibrosis Signaling Pathway	4.52	6.37	5.13		0.13	0.119	0.0741		3.355	1.809	2.746
	Role of Macrophages, Fibroblasts and Endothelial Cells in Rheumatoid Arthritis	4.52	5.67	8.22		0.137	0.121	0.102		NA	NA	NA
	IL-10 Signaling	4.52	6.17	5.41		0.243	0.243	0.171		NA	NA	NA
	Role of PKR in Interferon Induction and Antiviral Response	4.52	7.87	6.47		0.195	0.212	0.144		-0.218	-0.655	0
	LXR/RXR Activation	4.4	4.83	3.13		0.19	0.165	0.0992		-0.943	-0.728	-0.905
	IGF-1 Signaling	4.4	5.17	3.1		0.202	0.183	0.106		1.069	0.535	2.121
	Prolactin Signaling	4.3	5.39	3.27		0.222	0.21	0.123		0.775	0	1.667
	Systemic Lupus Erythematosus In B Cell Signaling Pathway	4.1	5.67	5.48		0.138	0.127	0.0873		1.298	1.859	2.449
	IL-8 Signaling	3.84	7.77	5.41		0.15	0.165	0.1		2.746	1.826	3.441
	IL-17 Signaling	3.56	5.8	8.01		0.15	0.15	0.128		3.402	3.024	4.082
	15 common pathways for HH vs control x HM vs control (excluding 18 pathways shared with LL vs control)
	NRF2-mediated Oxidative Stress Response	4.82	6.17	-		0.169	0.153	-		1.964	2.524	-
	HER-2 Signaling in Breast Cancer	4.68	4.68	-		0.165	0.134	-		0.354	0	-
	Prostate Cancer Signaling	4.54	4.79	-		0.22	0.187	-		NA	NA	-
	STAT3 Pathway	4.52	4.29	-		0.185	0.148	-		1	0.535	-
	Huntington's Disease Signaling	4.52	3.42	-		0.151	0.109	-		0	0.243	-
	MSP-RON Signaling In Cancer Cells Pathway	4.2	4.75	-		0.179	0.157	-		3.266	2.4	-
	Small Cell Lung Cancer Signaling	3.87	3.71	-		0.225	0.183	-		0	0.632	-
	Neuregulin Signaling	3.84	3.18	-		0.19	0.143	-		0.535	0	-
	Senescence Pathway	3.78	3.23	-		0.135	0.102	-		3.43	2.117	-
	Lymphotoxin β Receptor Signaling	3.51	4.29	-		0.245	0.226	-		1.732	1.508	-
	Hepatic Fibrosis / Hepatic Stellate Cell Activation	3.21	4.54	-		0.145	0.134	-		NA	NA	-
	Protein Ubiquitination Pathway	3.16	3.59	-		0.128	0.106	-		NA	NA	-
	ILK Signaling	3.07	4.38	-		0.142	0.132	-		2.711	1.964	-
	Coronavirus Pathogenesis Pathway	3.05	4.99	-		0.153	0.153	-		1.789	1.706	-
	PPARα/RXRα Activation	3.05	3.25	-		0.141	0.115	-		-3.128	-1.964	-
	No common pathways for HH vs control x LL vs control (excluding 18 pathways shared with HM vs control)
	9 common pathways for HM vs control x LL vs control (excluding 18 pathways shared with HH vs control)
	Granulocyte Adhesion and Diapedesis	-	5.91	6.81		-	0.156	0.121		-	NA	NA
	HMGB1 Signaling	-	5.32	4.08		-	0.152	0.097		-	1.279	2.673
	Neuroinflammation Signaling Pathway	-	5.32	7.4		-	0.12	0.0967		-	1.372	1.671
	EIF2 Signaling	-	4.89	3.58		-	0.129	0.0804		-	0.5	2.111
	Agranulocyte Adhesion and Diapedesis	-	4.34	5.05		-	0.13	0.0984		-	NA	NA
	Cardiac Hypertrophy Signaling (Enhanced)	-	3.8	3.13		-	0.0905	0.0563		-	3.592	3.4
	Hepatic Cholestasis	-	3.74	4.66		-	0.124	0.0968		-	NA	NA
	Colorectal Cancer Metastasis Signaling	-	3.72	3.45		-	0.111	0.0751		-	2.117	2.828
	IL-17A Signaling in Gastric Cells	-	3.07	3.24		-	0.269	0.231		-	1	1.342
	1 unique pathway for HH vs control
	Adipogenesis pathway	3.3	-	-		0.164	-	-		NA	-	-
	53 unique pathways for HM vs control
	IL-12 Signaling and Production in Macrophages	-	5.79	-		-	0.173	-		-	NA	-
	Erythropoietin Signaling Pathway	-	5.45	-		-	0.15	-		-	0	-
	mTOR Signaling	-	4.94	-		-	0.133	-		-	0.688	-
	Endocannabinoid Cancer Inhibition Pathway	-	4.83	-		-	0.154	-		-	1.279	-
	Ferroptosis Signaling Pathway	-	4.61	-		-	0.159	-		-	0.894	-
	Regulation of eIF4 and p70S6K Signaling	-	4.38	-		-	0.139	-		-	0	-
	Role of IL-17F in Allergic Inflammatory Airway Diseases	-	4.37	-		-	0.256	-		-	1.414	-
	Thyroid Cancer Signaling	-	4.37	-		-	0.19	-		-	1.291	-
	BAG2 Signaling Pathway	-	4.37	-		-	0.256	-		-	1.508	-
	Renal Cell Carcinoma Signaling	-	4.34	-		-	0.188	-		-	1.732	-
	Apoptosis Signaling	-	4.34	-		-	0.17	-		-	0.775	-
	JAK/Stat Signaling	-	4.34	-		-	0.188	-		-	0.258	-
	Aldosterone Signaling in Epithelial Cells	-	4.29	-		-	0.139	-		-	-0.378	-
	Estrogen Receptor Signaling	-	4.29	-		-	0.107	-		-	2.959	-
	Molecular Mechanisms of Cancer	-	4.28	-		-	0.1	-		-	NA	-
	Natural Killer Cell Signaling	-	4.24	-		-	0.127	-		-	2.2	-
	T Cell Exhaustion Signaling Pathway	-	4.13	-		-	0.131	-		-	1	-
	ERK/MAPK Signaling	-	4.07	-		-	0.124	-		-	1.279	-
	IL-15 Signaling	-	4.07	-		-	0.187	-		-	0	-
	Leukocyte Extravasation Signaling	-	3.94	-		-	0.124	-		-	1.279	-
	Type I Diabetes Mellitus Signaling	-	3.84	-		-	0.153	-		-	0.577	-
	Sumoylation Pathway	-	3.71	-		-	0.155	-		-	-0.277	-
	Apelin Endothelial Signaling Pathway	-	3.68	-		-	0.148	-		-	0.5	-
	Production of Nitric Oxide and Reactive Oxygen Species in Macrophages	-	3.67	-		-	0.122	-		-	0	-
	14-3-3-mediated Signaling	-	3.67	-		-	0.142	-		-	1.069	-
	LPS-stimulated MAPK Signaling	-	3.64	-		-	0.169	-		-	0	-
	Glioma Invasiveness Signaling	-	3.62	-		-	0.178	-		-	0.577	-
	Aryl Hydrocarbon Receptor Signaling	-	3.53	-		-	0.133	-		-	-1.069	-
	RAR Activation	-	3.52	-		-	0.119	-		-	NA	-
	Role of MAPK Signaling in Inhibiting the Pathogenesis of Influenza	-	3.52	-		-	0.173	-		-	0.832	-
	Complement System	-	3.52	-		-	0.243	-		-	-1.134	-
	CD40 Signaling	-	3.51	-		-	0.185	-		-	0.905	-
	HGF Signaling	-	3.51	-		-	0.142	-		-	1.387	-
	Neurotrophin/TRK Signaling	-	3.48	-		-	0.171	-		-	1.387	-
	p53 Signaling	-	3.47	-		-	0.153	-		-	0	-
	Germ Cell-Sertoli Cell Junction Signaling	-	3.46	-		-	0.123	-		-	NA	-
	IL-7 Signaling Pathway	-	3.38	-		-	0.167	-		-	0	-
	PI3K Signaling in B Lymphocytes	-	3.28	-		-	0.13	-		-	2.183	-
	Th17 Activation Pathway	-	3.27	-		-	0.154	-		-	0.535	-
	Atherosclerosis Signaling	-	3.25	-		-	0.134	-		-	NA	-
	Myc Mediated Apoptosis Signaling	-	3.24	-		-	0.2	-		-	0.632	-
	p70S6K Signaling	-	3.18	-		-	0.132	-		-	-0.775	-
	Induction of Apoptosis by HIV1	-	3.18	-		-	0.18	-		-	1.508	-
	T Cell Receptor Signaling	-	3.14	-		-	0.142	-		-	NA	-
	Gα12/13 Signaling	-	3.11	-		-	0.13	-		-	1	-
	Telomerase Signaling	-	3.11	-		-	0.14	-		-	1.291	-
	Axonal Guidance Signaling	-	3.11	-		-	0.085	-		-	NA	-
	CD27 Signaling in Lymphocytes	-	3.07	-		-	0.189	-		-	-0.333	-
	Th1 Pathway	-	3.05	-		-	0.132	-		-	0.775	-
	Bladder Cancer Signaling	-	3.05	-		-	0.144	-		-	0.447	-
	Actin Cytoskeleton Signaling	-	3.05	-		-	0.106	-		-	-0.426	-
	Integrin Signaling	-	3.05	-		-	0.108	-		-	0.853	-
	B Cell Receptor Signaling	-	3.04	-		-	0.113	-		-	1.789	-
	6 unique pathways for LL vs control
	Role of Osteoblasts, Osteoclasts and Chondrocytes in Rheumatoid Arthritis	-	-	3.72		-	-	0.0826		-	-	NA
	Inhibition of Angiogenesis by TSP1	-	-	3.46		-	-	0.206		-	-	1.134
	Endothelin-1 Signaling	-	-	3.45		-	-	0.0851		-	-	2.5
	IL-17A Signaling in Fibroblasts	-	-	3.35		-	-	0.194		-	-	NA
	Mouse Embryonic Stem Cell Pluripotency	-	-	3.13		-	-	0.107		-	-	0.905
	Differential Regulation of Cytokine Production in Macrophages and T Helper Cells by IL-17A and IL-17F	-	-	3.07		-	-	0.278		-	-	2.236
